# Supplementary material for: Discovery of cyclohexadepsipeptides with anti-Zika virus activities and biosynthesis of the nonproteinogenic building block (3S)-methyl-l-proline
Source: PubMed Central journal article supplement — J Biol Chem. 2021 May 23;297(1):100822. doi: 10.1016/j.jbc.2021.100822 (PMC8233208; doi:10.1016/j.jbc.2021.100822), 2021-05-23
Supplement: mmc1.pdf [file mmc1.pdf]

**Discovery of Cyclohexadepsipeptides with Anti-Zika Virus Activities and Biosynthesis of the Nonproteinogenic Building Block (3S)-Methyl-L-Proline**

Bochuan Yuan,<sup>a,+</sup> Ziwei Wu,<sup>a,+</sup> Wei Ji,<sup>b</sup> Dong Liu,<sup>a</sup> Xiang Guo,<sup>a</sup> Donghui Yang,<sup>a</sup> Aili Fan,<sup>a</sup> Hongli Jia,<sup>a</sup> Ming Ma,<sup>a,\*</sup> Wenhan Lin<sup>a,c,\*</sup>

<sup>[a]</sup> State Key Laboratory of Natural and Biomimetic Drugs, Beijing 100191, P.R. China

<sup>[b]</sup> School of Basic Medical Sciences, Peking University, Beijing 100191, P.R. China

<sup>[c]</sup> Institute of Ocean Research, Peking University, Beijing 100191, P.R. China

<sup>[+]</sup> These authors contributed equally to this work

\*Correspondence: [mma@bjmu.edu.cn](mailto:mma@bjmu.edu.cn); [whlin@bjmu.edu.cn](mailto:whlin@bjmu.edu.cn)

ORCID of Prof. Ma: 0000-0001-8311-3892

ORCID of Prof. Lin: 0000-0002-4978-4083

## Table of Contents

### Spectroscopic data of cyclohexadepsipeptides

**Table S1.** The  $^1\text{H}$  and  $^{13}\text{C}$  NMR data of **1** in DMSO- $d_6$  ( $\delta$  in ppm) (600 MHz) (key  $^1\text{H}$ - $^1\text{H}$  COSY and HMBC correlations are shown below)

**Table S2.** The  $^1\text{H}$  and  $^{13}\text{C}$  NMR data of **2** in DMSO- $d_6$  ( $\delta$  in ppm) (600 MHz) (key  $^1\text{H}$ - $^1\text{H}$  COSY and HMBC correlations are shown below)

**Table S3.** The  $^1\text{H}$  and  $^{13}\text{C}$  NMR data of **3** in DMSO- $d_6$  ( $\delta$  in ppm) (600 MHz) (key  $^1\text{H}$ - $^1\text{H}$  COSY and HMBC correlations are shown below)

**Table S4.** The  $^1\text{H}$  and  $^{13}\text{C}$  NMR data of **4** in DMSO- $d_6$  ( $\delta$  in ppm) (600 MHz) (key  $^1\text{H}$ - $^1\text{H}$  COSY and HMBC correlations are shown below)

**Table S5.** The  $^1\text{H}$  and  $^{13}\text{C}$  NMR data of **5** in DMSO- $d_6$  ( $\delta$  in ppm) (600 MHz) (key  $^1\text{H}$ - $^1\text{H}$  COSY and HMBC correlations are shown below)

**Table S6.** The  $^1\text{H}$  and  $^{13}\text{C}$  NMR data of **6** in DMSO- $d_6$  ( $\delta$  in ppm) (600 MHz) (key  $^1\text{H}$ - $^1\text{H}$  COSY and HMBC correlations are shown below)

**Table S7.** The  $^1\text{H}$  and  $^{13}\text{C}$  NMR data of **7** in DMSO- $d_6$  ( $\delta$  in ppm) (600 MHz) (key  $^1\text{H}$ - $^1\text{H}$  COSY and HMBC correlations are shown below)

**Table S8.** Clusters encoding non ribosomal peptide synthases (NRPSs) (excluding PKS/NRPS hybrids) in *B. felina* SX-6-22

**Table S9.** Gene annotation for *detx*, *isd* and *isr* clusters

**Table S10.** The substrate selectivity-conferring codes of A domains in DtxA, IsrA and IsdA

**Table S11.** Primers used in this study

**Table S12.** Plasmids and strains used in this study

**Figure S1.** Natural products containing (3*S*)-methyl-L-proline moiety

**Figure S2.** Morphological feature and phylogenetic analysis of *Beauveria felina* SX-6-22

**Figure S3.** HPLC chromatograph and  $^1\text{H}$  NMR spectrum for EtOAc extract of *B. felina* SX-6-22

**Figure S4.** Global Natural Product Social Molecular Networking (GNPS) based on LC-MS data

**Figure S5.** MS/MS spectra of known compounds (**12**, **20**, **23**, **27-30**) detected from total ion chromatogram (TIC)

**Figure S6.** The Marfey's analysis for the determination of absolute configuration of **6**

**Figure S7.** Schematic diagrams of gene deletion of *detxA*, *isdA*, *isrA*, *detxE*, *SX-p5cr1* and *SX-p5cr2* and PCR confirmation for mutants

**Figure S8.** LC-MS analysis of compounds accumulated in wild-type strain and mutants including  $\Delta detxA$ ,  $\Delta isdA$  and  $\Delta isrA$ . Compounds **1/2**, **3/4**, **5/8**, **21/22** and **7/25** are isomers

**Figure S9.** Proposed biogenetic oxidation of  $\alpha$ -HIC

**Figure S10.** The extracted ion chromatogram (EIC) detection of compounds accumulated in  $\Delta detxE$  mutant compared to wild-type strain

**Figure S11.** SDS-PAGE analysis of purified DetxE, SX-P5CR1 and SX-P5CR2

**Figure S12.** The UPLC profile of DetxE reaction with *o*-AB derivatization using L-isoleucine as the substrate

**Figure S13.** The HPLC profiles of DetxE reaction with Fmoc-Cl derivatization

**Figure S14.** The EIC analysis of DetxE reactions without Fmoc-Cl derivatization

**Figure S15.** The biosynthetic process of (4*R*)-methyl-L-proline reported in previous literature

**Figure S16.** The EIC analysis of DetxE combined with P5CR1/P5CR2 reactions, using L-isoleucine as the substrate and derivatized with Fmoc-Cl

**Figure S17.** Detection of lysosome acidification of A549 cells and the uncropped NS5 production inhibition images.

**Figure S18.** <sup>1</sup>H NMR spectrum of **1** (600 MHz, DMSO-*d*<sub>6</sub>)

**Figure S19.** <sup>13</sup>C APT spectrum of compound **1** (600 MHz, DMSO-*d*<sub>6</sub>)

**Figure S20.** <sup>1</sup>H-<sup>1</sup>H COSY spectrum of compound **1**

**Figure S21.** HSQC spectrum of compound **1**

**Figure S22.** HMBC spectrum of compound **1**

**Figure S23.** NOESY spectrum of compound **1**

**Figure S24.** IR of compound **1**

**Figure S25.** HRESIMS of compound **1**

**Figure S26.** <sup>1</sup>H NMR spectrum of compound **2** (600 MHz, DMSO-*d*<sub>6</sub>)

**Figure S27.** <sup>13</sup>C APT spectrum of compound **2** (600 MHz, DMSO-*d*<sub>6</sub>)

**Figure S28.** <sup>1</sup>H-<sup>1</sup>H COSY spectrum of compound **2**

**Figure S29.** HSQC spectrum of compound **2**

**Figure S30.** HMBC spectrum of compound **2**

**Figure S31.** NOESY spectrum of compound **2**

**Figure S32.** IR of compound **2**

**Figure S33.** HRESIMS of compound **2**

**Figure S34.** <sup>1</sup>H NMR spectrum of compound **3** (600 MHz, DMSO-*d*<sub>6</sub>)

**Figure S35.** <sup>13</sup>C APT spectrum of compound **3** (600 MHz, DMSO-*d*<sub>6</sub>)

**Figure S36.** <sup>1</sup>H-<sup>1</sup>H COSY spectrum of compound **3**

**Figure S37.** HSQC spectrum of compound **3**

**Figure S38.** HMBC spectrum of compound **3**

**Figure S39.** NOESY spectrum of compound **3**

**Figure S40.** IR of compound **3**

**Figure S41.** HRESIMS of compound **3**

**Figure S42.** <sup>1</sup>H NMR spectrum of compound **4** (600 MHz, DMSO-*d*<sub>6</sub>)

**Figure S43.** <sup>13</sup>C APT spectrum of compound **4** (600 MHz, DMSO-*d*<sub>6</sub>)

**Figure S44.** <sup>1</sup>H-<sup>1</sup>H COSY spectrum of compound **4**

**Figure S45.** HSQC spectrum of compound **4**

**Figure S46.** HMBC spectrum of compound **4**

- Figure S47.** IR of compound **4**
- Figure S48.** HRESIMS of compound **4**
- Figure S49.**  $^1\text{H}$  NMR spectrum of compound **5** (600 MHz,  $\text{DMSO-}d_6$ )
- Figure S50.**  $^{13}\text{C}$  APT spectrum of compound **5** (600 MHz,  $\text{DMSO-}d_6$ )
- Figure S51.**  $^1\text{H-}^1\text{H}$  COSY spectrum of compound **5**
- Figure S52.** HSQC spectrum of compound **5**
- Figure S53.** HMBC spectrum of compound **5**
- Figure S54.** IR of compound **5**
- Figure S55.** HRESIMS of compound **5**
- Figure S56.**  $^1\text{H}$  NMR spectrum of **6** (600 MHz,  $\text{DMSO-}d_6$ )
- Figure S57.**  $^{13}\text{C}$  APT spectrum of **6** (600 MHz,  $\text{DMSO-}d_6$ )
- Figure S58.**  $^1\text{H-}^1\text{H}$  COSY spectrum of **6**
- Figure S59.** HSQC spectrum of **6**
- Figure S60.** HMBC spectrum of **6**
- Figure S61.** NOESY spectrum of **6**
- Figure S62.** IR spectrum of **6**
- Figure S63.** HRESIMS spectrum of **6**
- Figure S64.**  $^1\text{H}$  NMR spectrum of **7** (600 MHz,  $\text{DMSO-}d_6$ )
- Figure S65.**  $^{13}\text{C}$  APT spectrum of **7** (600 MHz,  $\text{DMSO-}d_6$ )
- Figure S66.**  $^1\text{H-}^1\text{H}$  COSY spectrum of **7**
- Figure S67.** HSQC spectrum of **7**
- Figure S68.** HMBC spectrum of **7**
- Figure S69.** NOESY spectrum of **7**
- Figure S70.** IR spectrum of **7**
- Figure S71.** HRESIMS spectrum of **7**
- Figure S72.**  $^1\text{H}$  and  $^{13}\text{C}$  NMR and ESIMS spectra of roseotoxin C (**8**)
- Figure S73.**  $^1\text{H}$  and  $^{13}\text{C}$  NMR and ESIMS spectra of roseotoxin B (**9**)
- Figure S74.**  $^1\text{H}$  and  $^{13}\text{C}$  NMR and ESIMS spectra of roseotoxin A (**10**)
- Figure S75.**  $^1\text{H}$  and  $^{13}\text{C}$  NMR and ESIMS spectra of [ $\beta$ -MePro] destruxin E chlorohydrin (**11**)
- Figure S76.**  $^1\text{H}$  and  $^{13}\text{C}$  NMR and ESIMS spectra of destruxin A (**12**)
- Figure S77.**  $^1\text{H}$  and  $^{13}\text{C}$  NMR and ESIMS spectra of destruxin C (**13**)
- Figure S78.**  $^1\text{H}$  and  $^{13}\text{C}$  NMR and ESIMS spectra of destruxin D (**14**)
- Figure S79.**  $^1\text{H}$  and  $^{13}\text{C}$  NMR and ESIMS spectra of destruxin Ed (**15**)
- Figure S80.**  $^1\text{H}$  and  $^{13}\text{C}$  NMR and ESIMS spectra of destruxin F (**16**)
- Figure S81.**  $^1\text{H}$  and  $^{13}\text{C}$  NMR and ESIMS spectra of destruxin Chl (**17**)
- Figure S82.**  $^1\text{H}$  and  $^{13}\text{C}$  NMR and ESIMS spectra of destruxin Brh (**18**)
- Figure S83.**  $^1\text{H}$  and  $^{13}\text{C}$  NMR and ESIMS spectra of isaridin C (**19**)
- Figure S84.**  $^1\text{H}$  and  $^{13}\text{C}$  NMR and ESIMS spectra of isaridin A (**20**)

**Figure S85.**  $^1\text{H}$  and  $^{13}\text{C}$  NMR and ESIMS spectra of isariin G1 (**21**)

**Figure S86.**  $^1\text{H}$  and  $^{13}\text{C}$  NMR and ESIMS spectra of isariin G2 (**22**)

**Figure S87.**  $^1\text{H}$  and  $^{13}\text{C}$  NMR and ESIMS spectra of isoisariin B (**23**)

**Figure S88.**  $^1\text{H}$  and  $^{13}\text{C}$  NMR and ESIMS spectra of isariin E (**24**)

**Figure S89.**  $^1\text{H}$  and  $^{13}\text{C}$  NMR and ESIMS spectra of nodupetide (**25**)

**Figure S90.**  $^1\text{H}$  and  $^{13}\text{C}$  NMR and ESIMS spectra of isariin A (**26**)

**References**

**Spectroscopic data of cyclohexadepsipeptides**

Felinotoxin A (**1**): light yellowish crystal; mp 229.5-230.7 °C,  $[\alpha]_{\text{D}}^{25}$  -110 (*c* 0.06, MeOH). IR (KBr)  $\nu_{\text{max}}$  3385, 3292, 1670, 1632, 1446  $\text{cm}^{-1}$ ;  $^1\text{H}$  and  $^{13}\text{C}$  NMR data, see Table S1; HRESIMS  $m/z$  638.3766  $[\text{M} + \text{H}]^+$  (calcd for  $\text{C}_{31}\text{H}_{51}\text{N}_5\text{O}_9$ , 638.3765).

Felinotoxin B (**2**): light yellowish amorphous;  $[\alpha]_{\text{D}}^{25}$  -27 (*c* 0.06, MeOH). IR (KBr)  $\nu_{\text{max}}$  3385, 3292, 1670, 1632, 1446  $\text{cm}^{-1}$ ;  $^1\text{H}$  and  $^{13}\text{C}$  NMR data, see Table S2; HRESIMS  $m/z$  638.3761  $[\text{M} + \text{H}]^+$  (calcd for  $\text{C}_{31}\text{H}_{51}\text{N}_5\text{O}_9$ , 638.3765).

Felinotoxin C (**3**): white crystal; mp 185-186 °C,  $[\alpha]_{\text{D}}^{25}$  -56 (*c* 0.06, MeOH). IR (KBr)  $\nu_{\text{max}}$  3381, 2965, 1670, 1639, 1450  $\text{cm}^{-1}$ ;  $^1\text{H}$  and  $^{13}\text{C}$  NMR data, see Table S3; HRESIMS  $m/z$  626.3757  $[\text{M} + \text{H}]^+$  (calcd for  $\text{C}_{30}\text{H}_{52}\text{N}_5\text{O}_9$ , 626.3765).

Felinotoxin D (**4**): white amorphous;  $[\alpha]_{\text{D}}^{25}$  -36 (*c* 0.06, MeOH). IR (KBr)  $\nu_{\text{max}}$  3382, 2965, 1639, 1449  $\text{cm}^{-1}$ ;  $^1\text{H}$  and  $^{13}\text{C}$  NMR data, see Table S4; HRESIMS  $m/z$  626.3763  $[\text{M} + \text{H}]^+$  (calcd for  $\text{C}_{30}\text{H}_{52}\text{N}_5\text{O}_9$ , 626.3765).

Felinotoxin E (**5**): light yellowish amorphous; mp 235.1-235.8 °C,  $[\alpha]_{\text{D}}^{25}$  -18 (*c* 0.06, MeOH). IR (KBr)  $\nu_{\text{max}}$  3378, 2968, 1678, 1209, 1186  $\text{cm}^{-1}$ ;  $^1\text{H}$  and  $^{13}\text{C}$  NMR data, see Table S5; HRESIMS  $m/z$  624.3763  $[\text{M} + \text{H}]^+$  (calcd for  $\text{C}_{30}\text{H}_{54}\text{N}_5\text{O}_8$ , 624.3972).

Felinotoxin F (**6**): white amorphous;  $[\alpha]_{\text{D}}^{25}$  -34 (*c* 0.06, MeOH). IR (KBr)  $\nu_{\text{max}}$  3282, 2960, 1645, 1541  $\text{cm}^{-1}$ ;  $^1\text{H}$  and  $^{13}\text{C}$  NMR data, see Table S6; HRESIMS  $m/z$  703.4182  $[\text{M} + \text{H}]^+$  (calcd for  $\text{C}_{39}\text{H}_{55}\text{N}_6\text{O}_6$ , 703.4183).

Felinotoxin G (**7**): white powder;  $[\alpha]_{\text{D}}^{25}$  -13 (*c* 0.06, MeOH). IR (KBr)  $\nu_{\text{max}}$  3400, 3325, 2960, 1651, 1542  $\text{cm}^{-1}$ ;  $^1\text{H}$  and  $^{13}\text{C}$  NMR data, see Table S7; HRESIMS  $m/z$  568.3708  $[\text{M} + \text{H}]^+$  (calcd for  $\text{C}_{28}\text{H}_{50}\text{N}_5\text{O}_7$ , 568.3710).

Roseotoxin C (**8**): white powder;  $[\alpha]_{\text{D}}^{25}$  -32 (*c* 0.06, MeOH).  $^1\text{H}$  and  $^{13}\text{C}$  NMR (100 MHz,  $\text{DMSO-}d_6$ ) data for  $\beta$ -Me-Pro:  $\delta_{\text{H}}$  3.98 (1H, d,  $J = 2.0$  Hz), 2.49 (1H, m), 1.03 (3H, d,  $J = 7.0$  Hz), 1.69/1.93 (2H, m), 3.65/3.80 (2H, m);  $\delta_{\text{C}}$  170.3 (CO), 66.5, 36.4, 18.7, 30.3, 44.6, Ile:  $\delta_{\text{H}}$  6.96 (1H, d,  $J = 9.4$  Hz, NH), 4.76 (1H, dd,  $J = 6.9, 9.4$  Hz), 1.85 (1H, m), 0.77 (3H, d,  $J = 6.2$  Hz), 1.25/1.39 (2H, m), 0.78 (3H, t,  $J = 7.0$  Hz);  $\delta_{\text{C}}$  173.1 (CO), 52.6, 36.7, 15.1, 23.9, 11.2, NMe-Val:  $\delta_{\text{H}}$  4.99 (1H, d,  $J = 10.9$

Hz), 2.19 (1H, dqq,  $J = 6.5, 6.5, 10.9$  Hz), 0.84 (3H, d,  $J = 6.5$  Hz), 0.86 (3H, d,  $J = 6.5$  Hz), 3.13 (3H, s, NMe);  $\delta_{\text{C}}$  170.5 (CO), 57.1, 26.7, 19.1, 19.1, NMe-Ala:  $\delta_{\text{H}}$  5.17 (1H, q,  $J = 6.5$  Hz), 1.17 (3H, d,  $J = 6.5$  Hz), 2.54 (3H, s, NMe);  $\delta_{\text{C}}$  169.0 (CO), 54.8, 15.4, 27.7,  $\beta$ -Ala:  $\delta_{\text{H}}$  8.10 (1H, dd,  $J = 3.0, 10.0$  Hz, NH), 2.35/2.77 (2H, m), 2.92/3.85 (2H, m);  $\delta_{\text{C}}$  173.3 (CO), 34.0, 32.9, 2,5-dihydroxy-4-methylpentanoic acid:  $\delta_{\text{H}}$  5.00 (1H, d,  $J = 11.0$  Hz), 1.37/1.89 (2H, m), 1.68 (1H, m), 0.88 (3H, d,  $J = 6.6$  Hz), 3.72 (2H, m);  $\delta_{\text{C}}$  173.1 (CO), 71.2, 33.6, 31.6, 15.9, 66.4, 23.1.  $\text{C}_{30}\text{H}_{53}\text{N}_5\text{O}_8$ , ESIMS  $m/z$  624.4299  $[\text{M}+\text{H}]^+$ , 646.4120  $[\text{M}+\text{Na}]^+$ .

Roseotoxin B (**9**): white powder;  $[\alpha]_{\text{D}}^{25} -50$  ( $c$  0.24, MeOH).  $^1\text{H}$  and  $^{13}\text{C}$  NMR (100 MHz, DMSO- $d_6$ ) data for  $\beta$ -Me-Pro:  $\delta_{\text{H}}$  3.97 (1H, d,  $J = 2.0$  Hz), 2.47 (1H, m), 1.00 (3H, d,  $J = 7.0$  Hz), 1.65/1.92 (2H, m), 3.67/3.76 (2H, m);  $\delta_{\text{C}}$  170.2 (CO), 66.5, 36.3, 18.6, 30.2, 44.7, Ile:  $\delta_{\text{H}}$  6.96 (1H, d,  $J = 9.4$  Hz, NH), 4.78 (1H, dd,  $J = 6.6, 9.4$  Hz), 1.83 (1H, m), 0.77 (3H, d,  $J = 6.2$  Hz), 1.23/1.38 (2H, m), 0.78 (3H, t,  $J = 7.0$  Hz);  $\delta_{\text{C}}$  173.0 (CO), 52.5, 36.7, 15.1, 23.8, 11.2, NMe-Val:  $\delta_{\text{H}}$  5.00 (1H, d,  $J = 10.9$  Hz), 2.19 (1H, dqq,  $J = 6.5, 6.5, 10.9$  Hz), 0.84 (3H, d,  $J = 6.5$  Hz), 0.86 (3H, d,  $J = 6.5$  Hz), 3.13 (3H, s, NMe);  $\delta_{\text{C}}$  170.5 (CO), 57.1, 26.7, 19.1, 19.1, 30.5 (NMe), NMe-Ala:  $\delta_{\text{H}}$  5.17 (1H, q,  $J = 6.6$  Hz), 1.17 (3H, d,  $J = 6.6$  Hz), 2.54 (3H, s, NMe);  $\delta_{\text{C}}$  169.0 (CO), 54.8, 15.4, 27.7,  $\beta$ -Ala:  $\delta_{\text{H}}$  8.10 (1H, dd,  $J = 3.0, 10.0$  Hz, NH), 2.36/2.77 (2H, m), 2.93/3.85 (2H, m);  $\delta_{\text{C}}$  173.2 (CO), 34.1, 32.9, 2-methylpent-4-enoic acid:  $\delta_{\text{H}}$  5.04 (1H, d,  $J = 11.0$  Hz), 2.50/2.51 (2H, m), 5.81 (1H, m), 5.14 (1H, brd,  $J = 11.0$  Hz), 5.21 (1H, brd,  $J = 16.0$  Hz);  $\delta_{\text{C}}$  168.6 (CO), 71.9, 34.7, 131.7, 119.3.  $\text{C}_{30}\text{H}_{49}\text{N}_5\text{O}_7$ , ESIMS  $m/z$  592.3715  $[\text{M}+\text{H}]^+$ , 614.3531  $[\text{M}+\text{Na}]^+$ .

Roseotoxin A (**10**): white powder;  $[\alpha]_{\text{D}}^{25} -46$  ( $c$  0.24, MeOH).  $^1\text{H}$  and  $^{13}\text{C}$  NMR (100 MHz, DMSO- $d_6$ ) data for  $\beta$ -Me-Pro:  $\delta_{\text{H}}$  3.98 (1H, d,  $J = 2.0$  Hz), 2.50 (1H, m), 1.03 (3H, d,  $J = 6.9$  Hz), 1.70/1.95 (2H, m), 3.61/3.81 (2H, m);  $\delta_{\text{C}}$  170.2 (CO), 66.5, 36.4, 18.7, 30.3, 44.6, Ile:  $\delta_{\text{H}}$  6.92 (1H, d,  $J = 9.3$  Hz, NH), 4.76 (1H, dd,  $J = 6.9, 9.3$  Hz), 1.86 (1H, m), 0.77 (3H, d,  $J = 6.2$  Hz), 1.25/1.74 (2H, m), 0.78 (3H, t,  $J = 7.0$  Hz);  $\delta_{\text{C}}$  173.0 (CO), 52.6, 36.7, 15.1, 23.9, 11.1, NMe-Val:  $\delta_{\text{H}}$  4.99 (1H, d,  $J = 10.9$  Hz), 2.19 (1H, dqq,  $J = 6.5, 6.5, 10.9$  Hz), 0.84 (3H, d,  $J = 6.5$  Hz), 0.87 (3H, d,  $J =$

6.5 Hz), 3.13 (3H, s, NMe);  $\delta_{\text{C}}$  170.5 (CO), 57.1, 26.7, 19.1, 19.1, NMe-Ala:  $\delta_{\text{H}}$  5.17 (1H, q,  $J = 6.6$  Hz), 1.17 (3H, d,  $J = 6.6$  Hz), 2.54 (3H, s, NMe);  $\delta_{\text{C}}$  169.2 (CO), 54.8, 15.4, 27.7,  $\beta$ -Ala:  $\delta_{\text{H}}$  8.09 (1H, dd,  $J = 3.0, 9.0$  Hz, NH), 2.35/2.77 (2H, m), 2.93/3.86 (2H, m);  $\delta_{\text{C}}$  173.3 (CO), 34.0, 32.5, 2-hydroxy-4-methylpentanoic acid:  $\delta_{\text{H}}$  4.97 (1H, d,  $J = 11.3$  Hz), 1.47/1.70 (2H, m), 1.74 (1H, m), 0.92 (3H, d,  $J = 6.5$  Hz), 0.94 (3H, d,  $J = 6.5$  Hz);  $\delta_{\text{C}}$  169.0 (CO), 71.5, 38.4, 24.0, 21.5, 23.1.  $\text{C}_{31}\text{H}_{53}\text{N}_5\text{O}_7$ , ESIMS  $m/z$  608.4021  $[\text{M}+\text{H}]^+$ , 630.3839  $[\text{M}+\text{Na}]^+$ .

Desmethyldestruxin Ch1 (**11**): white powder;  $[\alpha]_{\text{D}}^{25}$  -84 ( $c$  0.06, MeOH).  $^1\text{H}$  and  $^{13}\text{C}$  NMR (100 MHz, DMSO- $d_6$ ) data for  $\beta$ -Me-Pro:  $\delta_{\text{H}}$  4.01 (1H, d,  $J = 2.0$  Hz), 2.48 (1H, m), 1.03 (3H, d,  $J = 6.9$  Hz), 1.68/1.94 (2H, m), 3.77/3.88 (2H, m);  $\delta_{\text{C}}$  170.2 (CO), 66.6, 36.5, 18.7, 30.2, 44.6, Ile:  $\delta_{\text{H}}$  6.92 (1H, d,  $J = 9.3$  Hz, NH), 4.79 (1H, dd,  $J = 6.4, 9.3$  Hz), 1.83 (1H, m), 0.78 (3H, d,  $J = 6.2$  Hz), 1.24/1.38 (2H, m), 0.77 (3H, t,  $J = 7.0$  Hz);  $\delta_{\text{C}}$  173.0 (CO), 52.5, 36.7, 15.2, 23.7, 11.2, NMe-Val:  $\delta_{\text{H}}$  5.02 (1H, d,  $J = 11.0$  Hz), 2.19 (1H, dq,  $J = 6.5, 6.5, 11.0$  Hz), 0.86 (3H, d,  $J = 6.5$  Hz), 0.86 (3H, d,  $J = 6.5$  Hz), 3.13 (3H, s, NMe);  $\delta_{\text{C}}$  170.5 (CO), 57.1, 26.7, 19.1, 19.1, NMe-Ala:  $\delta_{\text{H}}$  5.17 (1H, q,  $J = 6.6$  Hz), 1.17 (3H, d,  $J = 6.6$  Hz), 2.54 (3H, s, NMe);  $\delta_{\text{C}}$  169.0 (CO), 54.8, 15.3, 27.7,  $\beta$ -Ala:  $\delta_{\text{H}}$  8.09 (1H, dd,  $J = 3.0, 9.6$  Hz, NH), 2.35/2.78 (2H, m), 2.94/3.84 (2H, m);  $\delta_{\text{C}}$  173.2 (CO), 34.1, 32.9, 5-chloro-2,4-dihydroxypentanoic acid:  $\delta_{\text{H}}$  5.09 (1H, t,  $J = 7.2$  Hz), 2.00 (2H, m), 3.66 (1H, m), 3.64 (2H, m);  $\delta_{\text{C}}$  168.7 (CO), 71.4, 35.1, 66.6, 49.4.  $\text{C}_{30}\text{H}_{50}\text{ClN}_5\text{O}_8$ , ESIMS  $m/z$  644.3451  $[\text{M}+\text{H}]^+$ , 666.3268  $[\text{M}+\text{Na}]^+$ .

Destruxin A (**12**): white powder;  $[\alpha]_{\text{D}}^{25}$  -100 ( $c$  0.06, MeOH).  $^1\text{H}$  and  $^{13}\text{C}$  NMR (100 MHz, DMSO- $d_6$ ) data for Pro:  $\delta_{\text{H}}$  4.39 (1H, dd,  $J = 2.0, 7.5$  Hz), 1.97/2.10 (2H, m), 1.74/1.98 (2H, m), 3.54/3.81 (2H, m);  $\delta_{\text{C}}$  170.5 (CO), 60.0, 29.0, 23.5, 46.3, Ile:  $\delta_{\text{H}}$  6.96 (1H, d,  $J = 9.4$  Hz, NH), 4.80 (1H, dd,  $J = 6.5, 9.4$  Hz), 1.83 (1H, m), 0.77 (3H, d,  $J = 7.0$  Hz), 1.21/1.36 (2H, m), 0.78 (3H, t,  $J = 7.0$  Hz);  $\delta_{\text{C}}$  173.0 (CO), 52.6, 36.8, 15.2, 23.7, 11.2, NMe-Val:  $\delta_{\text{H}}$  4.99 (1H, d,  $J = 11.0$  Hz), 2.18 (1H, dq,  $J = 6.5, 6.5, 11.0$  Hz), 0.84 (3H, d,  $J = 6.5$  Hz), 0.86 (3H, d,  $J = 6.5$  Hz), 3.13 (3H, s, NMe);  $\delta_{\text{C}}$  170.5 (CO), 57.2, 26.7, 19.1, 19.1, 30.5 (NMe), NMe-Ala:  $\delta_{\text{H}}$  5.18 (1H, q,  $J = 6.7$  Hz), 1.17 (3H, d,  $J = 6.7$  Hz), 2.54 (3H, s, NMe);  $\delta_{\text{C}}$  169.0 (CO), 54.8, 15.4, 27.7,



$\beta$ -Ala:  $\delta_{\text{H}}$  8.07 (1H, dd,  $J = 2.0, 10.0$  Hz, NH), 2.33/2.48 (2H, m), 2.93/3.84 (2H, m);  $\delta_{\text{C}}$  173.2 (CO), 34.0, 32.9, 2-hydroxypent-4-enoic acid:  $\delta_{\text{H}}$  5.02 (1H, t,  $J = 7.0$  Hz), 2.20/2.36 (2H, m), 5.80 (1H, m), 5.12 (1H, d,  $J = 11.0$  Hz), 5.19 (1H, d,  $J = 11.0$  Hz);  $\delta_{\text{C}}$  168.2 (CO), 72.1, 34.2, 132.2, 118.8.  $\text{C}_{29}\text{H}_{47}\text{N}_5\text{O}_7$ , ESIMS  $m/z$  578.3778  $[\text{M}+\text{H}]^+$ , 600.3605 $[\text{M}+\text{Na}]^+$ .

Destruxin C (**13**): white powder;  $[\alpha]_{\text{D}}^{25}$  -64 ( $c$  0.06, MeOH).  $^1\text{H}$  and  $^{13}\text{C}$  NMR (100 MHz, DMSO- $d_6$ ) data for Pro:  $\delta_{\text{H}}$  4.38 (1H, dd,  $J = 2.0, 7.6$  Hz), 2.12/2.20 (2H, m), 1.75/2.01 (2H, m), 3.49/3.86 (2H, m);  $\delta_{\text{C}}$  170.5 (CO), 60.0, 28.9, 23.6, 46.1, Ile:  $\delta_{\text{H}}$  6.96 (1H, d,  $J = 9.4$  Hz, NH), 4.79 (1H, dd,  $J = 6.7, 9.4$  Hz), 1.85 (1H, m), 0.78 (3H, d,  $J = 7.0$  Hz), 1.25/1.39 (2H, m), 0.77 (3H, t,  $J = 7.0$  Hz);  $\delta_{\text{C}}$  173.0 (CO), 52.6, 36.7, 15.1, 23.8, 11.2, NMe-Val:  $\delta_{\text{H}}$  4.97 (1H, d,  $J = 10.8$  Hz), 2.18 (1H, dq,  $J = 6.5, 10.8$  Hz), 0.84 (3H, d,  $J = 6.5$  Hz), 0.86 (3H, d,  $J = 6.5$  Hz), 3.13 (3H, s, NMe);  $\delta_{\text{C}}$  170.5 (CO), 57.2, 26.7, 19.1, 19.1, 30.5 (NMe), NMe-Ala:  $\delta_{\text{H}}$  5.17 (1H, q,  $J = 6.7$  Hz), 1.17 (3H, d,  $J = 6.7$  Hz), 2.54 (3H, s, NMe);  $\delta_{\text{C}}$  169.0 (CO), 54.7, 15.4, 27.7,  $\beta$ -Ala:  $\delta_{\text{H}}$  8.07 (1H, dd,  $J = 2.0, 10.0$  Hz, NH), 2.33/2.78 (2H, m), 2.93/3.84 (2H, m);  $\delta_{\text{C}}$  173.3 (CO), 34.0, 32.9, 2,5-dihydroxy-methylpentanedioic acid:  $\delta_{\text{H}}$  4.98 (1H, t,  $J = 7.0$  Hz), 1.36/1.87 (2H, m), 1.71 (1H, m), 0.87 (3H, d,  $J = 7.0$  Hz), 3.25 (2H, m);  $\delta_{\text{C}}$  169.0 (CO), 72.2, 33.4, 31.6, 15.8, 66.3.  $\text{C}_{29}\text{H}_{51}\text{N}_5\text{O}_8$ , ESIMS  $m/z$  610.4145  $[\text{M}+\text{H}]^+$ , 632.3973  $[\text{M}+\text{Na}]^+$ .

Destruxin D (**14**): white powder;  $[\alpha]_{\text{D}}^{25}$  -80 ( $c$  0.06, MeOH).  $^1\text{H}$  and  $^{13}\text{C}$  NMR (100 MHz, DMSO- $d_6$ ) data for Pro:  $\delta_{\text{H}}$  4.36 (1H, dd,  $J = 2.0, 7.5$  Hz), 2.00/2.11 (2H, m), 1.23/1.78 (2H, m), 3.54/3.83 (2H, m);  $\delta_{\text{C}}$  170.6 (CO), 60.1, 28.9, 23.7, 46.1, Ile:  $\delta_{\text{H}}$  6.96 (1H, d,  $J = 9.4$  Hz, NH), 4.79 (1H, dd,  $J = 6.5, 9.4$  Hz), 1.83 (1H, m), 0.78 (3H, d,  $J = 7.0$  Hz), 1.23/1.38 (2H, m), 0.77 (3H, t,  $J = 7.0$  Hz);  $\delta_{\text{C}}$  173.0 (CO), 52.6, 36.7, 15.2, 23.8, 11.2, NMe-Val:  $\delta_{\text{H}}$  4.97 (1H, d,  $J = 10.5$  Hz), 2.19 (1H, dq,  $J = 6.5, 10.5$  Hz), 0.84 (3H, d,  $J = 6.5$  Hz), 0.87 (3H, d,  $J = 6.5$  Hz), 3.13 (3H, s, NMe);  $\delta_{\text{C}}$  170.5 (CO), 57.2, 26.7, 19.1, 19.1, 30.5 (NMe), NMe-Ala:  $\delta_{\text{H}}$  5.17 (1H, q,  $J = 6.7$  Hz), 1.17 (3H, d,  $J = 6.7$  Hz), 2.54 (3H, s, NMe);  $\delta_{\text{C}}$  169.1 (CO), 54.8, 15.4, 27.7,  $\beta$ -Ala:  $\delta_{\text{H}}$  8.05 (1H, dd,  $J = 2.0, 10.0$  Hz, NH), 2.35/2.75 (2H, m), 2.93/3.83 (2H, m);

$\delta_{\text{C}}$  173.1 (CO), 34.0, 32.9, 2-hydroxy-4-methylpentanedioic acid:  $\delta_{\text{H}}$  4.99 (1H, t,  $J = 7.0$  Hz), 1.75/2.00 (2H, m), 2.49 (1H, m), 1.13 (3H, d,  $J = 7.0$  Hz);  $\delta_{\text{C}}$  176.8 (COOH), 168.3 (CO), 71.1, 23.6, 35.0, 16.9.  $\text{C}_{30}\text{H}_{48}\text{N}_5\text{O}_9$ , ESIMS  $m/z$  624.3854  $[\text{M}+\text{H}]^+$ , 600.3605 $[\text{M}+\text{Na}]^+$ .

Destruxin Ed (**15**): white powder;  $[\alpha]_{\text{D}}^{25} -53$  ( $c$  0.06, MeOH).  $^1\text{H}$  and  $^{13}\text{C}$  NMR (100 MHz, DMSO- $d_6$ ) data for Pro:  $\delta_{\text{H}}$  4.40 (1H, dd,  $J = 2.0, 7.7$  Hz), 2.00/2.09 (2H, m), 1.76/1.99 (2H, m), 3.80 (2H, m);  $\delta_{\text{C}}$  170.5 (CO), 60.0, 29.3, 23.5, 46.0, Ile:  $\delta_{\text{H}}$  6.97 (1H, d,  $J = 9.5$  Hz, NH), 4.81 (1H, dd,  $J = 6.3, 9.5$  Hz), 1.81 (1H, m), 0.78 (3H, d,  $J = 6.0$  Hz), 1.23/1.37 (2H, m), 0.77 (3H, t,  $J = 7.0$  Hz);  $\delta_{\text{C}}$  173.0 (CO), 52.5, 36.7, 15.2, 23.6, 11.2, NMe-Val:  $\delta_{\text{H}}$  5.01 (1H, d,  $J = 10.8$  Hz), 2.19 (1H, dq,  $J = 6.5, 6.5, 10.9$  Hz), 0.84 (3H, d,  $J = 6.5$  Hz), 0.87 (3H, d,  $J = 6.5$  Hz), 3.13 (3H, s, NMe);  $\delta_{\text{C}}$  170.5 (CO), 57.1, 26.7, 19.1, 19.1, NMe-Ala:  $\delta_{\text{H}}$  5.17 (1H, q,  $J = 6.7$  Hz), 1.17 (3H, d,  $J = 6.7$  Hz), 2.54 (3H, s, NMe);  $\delta_{\text{C}}$  168.8 (CO), 54.8, 15.4, 27.7,  $\beta$ -Ala:  $\delta_{\text{H}}$  8.07 (1H, dd,  $J = 3.0, 10.0$  Hz, NH), 2.35/2.77 (2H, m), 2.94/3.84 (2H, m);  $\delta_{\text{C}}$  173.3 (CO), 34.2, 32.9, 2,4,5-trihydroxypentanoic acid:  $\delta_{\text{H}}$  5.09 (1H, t,  $J = 7.0$  Hz), 1.75/1.94 (2H, m), 3.41 (1H, m), 3.27/3.34 (2H, m);  $\delta_{\text{C}}$  169.0 (CO), 71.1, 35.0, 67.2, 65.8.  $\text{C}_{29}\text{H}_{49}\text{N}_5\text{O}_9$ , ESIMS  $m/z$  612.3611  $[\text{M}+\text{H}]^+$ .

Destruxin F (**16**): white powder;  $[\alpha]_{\text{D}}^{25} -106$  ( $c$  0.06, MeOH).  $^1\text{H}$  and  $^{13}\text{C}$  NMR (100 MHz, DMSO- $d_6$ ) data for Pro:  $\delta_{\text{H}}$  4.40 (1H, dd,  $J = 2.0, 7.6$  Hz), 1.99/2.09 (2H, m), 1.76/2.00 (2H, m), 3.76/3.80 (2H, m);  $\delta_{\text{C}}$  170.5 (CO), 60.0, 29.2, 23.5, 46.1, Ile:  $\delta_{\text{H}}$  6.96 (1H, d,  $J = 9.4$  Hz, NH), 4.81 (1H, dd,  $J = 6.3, 9.4$  Hz), 1.82 (1H, m), 0.77 (3H, d,  $J = 6.0$  Hz), 1.23/1.36 (2H, m), 0.78 (3H, t,  $J = 7.0$  Hz);  $\delta_{\text{C}}$  172.9 (CO), 52.6, 36.7, 15.2, 23.7, 11.2, NMe-Val:  $\delta_{\text{H}}$  5.00 (1H, d,  $J = 11.0$  Hz), 2.18 (1H, dq,  $J = 6.5, 6.5, 11.0$  Hz), 0.84 (3H, d,  $J = 6.5$  Hz), 0.87 (3H, d,  $J = 6.5$  Hz), 3.13 (3H, s, NMe);  $\delta_{\text{C}}$  170.5 (CO), 57.1, 26.7, 19.1, 19.1, 30.5, NMe-Ala:  $\delta_{\text{H}}$  5.16 (1H, q,  $J = 6.6$  Hz), 1.17 (3H, d,  $J = 6.6$  Hz), 2.54 (3H, s, NMe);  $\delta_{\text{C}}$  169.0 (CO), 54.8, 15.3, 27.7,  $\beta$ -Ala:  $\delta_{\text{H}}$  8.07 (1H, dd,  $J = 2.0, 10.0$  Hz, NH), 2.34/2.77 (2H, m), 2.94/3.84 (2H, m);  $\delta_{\text{C}}$  173.3 (CO), 34.1, 32.9, 2,4-dihydroxypentanoic acid:  $\delta_{\text{H}}$  5.06 (1H, t,  $J = 7.0$  Hz), 1.79/1.80 (2H, m), 3.62 (1H, m), 1.10 (3H, d,  $J = 7.0$  Hz);  $\delta_{\text{C}}$  168.8 (CO), 71.0, 40.4,

62.2, 23.7. C<sub>29</sub>H<sub>49</sub>N<sub>5</sub>O<sub>8</sub>, ESIMS *m/z* 596.3654 [M+H]<sup>+</sup>.

Destruxin Chl (**17**): white powder; [α]<sub>D</sub><sup>25</sup> -128 (*c* 0.06, MeOH). <sup>1</sup>H and <sup>13</sup>C NMR (100 MHz, DMSO-*d*<sub>6</sub>) data for Pro: δ<sub>H</sub> 4.40 (1H, dd, *J* = 2.0, 7.6 Hz), 2.00/2.09 (2H, m), 1.76/2.00 (2H, m), 3.71/3.82 (2H, m); δ<sub>C</sub> 170.5 (CO), 60.1, 29.2, 23.5, 46.2, Ile: δ<sub>H</sub> 6.97 (1H, d, *J* = 9.4 Hz, NH), 4.81 (1H, dd, *J* = 6.4, 9.4 Hz), 1.83 (1H, m), 0.77 (3H, d, *J* = 6.0 Hz), 1.23/1.38 (2H, m), 0.78 (3H, t, *J* = 7.0 Hz); δ<sub>C</sub> 173.0 (CO), 52.6, 36.8, 15.2, 23.7, 11.2, NMe-Val: δ<sub>H</sub> 5.00 (1H, d, *J* = 10.9 Hz), 2.18 (1H, dq, *J* = 6.5, 6.5, 10.9 Hz), 0.84 (3H, d, *J* = 6.5 Hz), 0.87 (3H, d, *J* = 6.5 Hz), 3.13 (3H, s, NMe); δ<sub>C</sub> 170.5 (CO), 57.1, 26.7, 19.1, 19.2, NMe-Ala: δ<sub>H</sub> 5.16 (1H, q, *J* = 6.7 Hz), 1.17 (3H, d, *J* = 6.7 Hz), 2.54 (3H, s, NMe); δ<sub>C</sub> 169.0 (CO), 54.8, 15.4, 27.8, β-Ala: δ<sub>H</sub> 8.07 (1H, dd, *J* = 2.0, 10.0 Hz, NH), 2.34/2.78 (2H, m), 2.94/3.83 (2H, m); δ<sub>C</sub> 173.3 (CO), 34.3, 32.9, 5-chloro-2,4-dihydroxy pentanoic acid: δ<sub>H</sub> 5.06 (1H, t, *J* = 7.0 Hz), 1.92/1.96 (2H, m), 3.72 (1H, m), 3.62/3.63 (2H, m); δ<sub>C</sub> 168.4 (CO), 70.5, 35.0, 66.3, 46.5. C<sub>29</sub>H<sub>48</sub>ClN<sub>5</sub>O<sub>8</sub>, ESIMS *m/z* 630.3519 [M+H]<sup>+</sup>, 652.2346 [M+Na]<sup>+</sup>.

Destruxin Br1 (**18**): white crystal; mp 202.9-204.8, [α]<sub>D</sub><sup>25</sup> -43 (*c* 0.06, MeOH). <sup>1</sup>H and <sup>13</sup>C NMR (100 MHz, DMSO-*d*<sub>6</sub>) data for Pro: δ<sub>H</sub> 4.40 (1H, dd, *J* = 2.0, 7.5 Hz), 2.00/2.09 (2H, m), 1.76/2.00 (2H, m), 3.70/3.80 (2H, m); δ<sub>C</sub> 170.5 (CO), 60.0, 29.2, 23.5, 46.2, Ile: δ<sub>H</sub> 6.97 (1H, d, *J* = 9.4 Hz, NH), 4.81 (1H, dd, *J* = 6.4, 9.4 Hz), 1.81 (1H, m), 0.78 (3H, d, *J* = 6.0 Hz), 1.23/1.38 (2H, m), 0.77 (3H, t, *J* = 7.0 Hz); δ<sub>C</sub> 172.9 (CO), 52.6, 36.7, 15.2, 23.7, 11.2, NMe-Val: δ<sub>H</sub> 5.00 (1H, d, *J* = 10.8 Hz), 2.19 (1H, dq, *J* = 6.5, 6.5, 10.9 Hz), 0.84 (3H, d, *J* = 6.5 Hz), 0.87 (3H, d, *J* = 6.5 Hz), 3.13 (3H, s, NMe); δ<sub>C</sub> 170.5 (CO), 57.1, 26.7, 19.1, 19.1, NMe-Ala: δ<sub>H</sub> 5.16 (1H, q, *J* = 6.6 Hz), 1.17 (3H, d, *J* = 6.6 Hz), 2.54 (3H, s, NMe); δ<sub>C</sub> 169.0 (CO), 54.8, 15.4, 27.7, β-Ala: δ<sub>H</sub> 8.09 (1H, dd, *J* = 2.0, 10.0 Hz, NH), 2.36/2.78 (2H, m), 2.93/3.84 (2H, m); δ<sub>C</sub> 173.2 (CO), 34.1, 32.9, 25-bromo-2,4-dihydroxypentanoic acid: δ<sub>H</sub> 5.06 (1H, t, *J* = 7.2 Hz), 1.95 (2H, m), 3.77 (1H, m), 3.70/3.82 (2H, m); δ<sub>C</sub> 168.4 (CO), 71.5, 35.8, 65.8, 46.2. C<sub>29</sub>H<sub>48</sub>BrN<sub>5</sub>O<sub>8</sub>, ESIMS *m/z* 674.2794 [M+H]<sup>+</sup>.

Isaridin C (**19**): white powder; [α]<sub>D</sub><sup>25</sup> -40 (*c* 0.12, MeOH). <sup>1</sup>H and <sup>13</sup>C NMR (100 MHz, DMSO-*d*<sub>6</sub>) data for Pro: δ<sub>H</sub> 4.10 (1H, dd, *J* = 2.0, 8.3 Hz), 1.97, 2.08 (2H, m),

1.06, 1.69 (2H, m), 3.27 (2H, m);  $\delta_{\text{C}}$  171.1 (CO), 60.1, 31.5, 21.4, 46.7, Phe:  $\delta_{\text{H}}$  7.90 (1H, d,  $J = 7.6$  Hz, NH), 4.61 (1H, ddd,  $J = 3.0, 7.6, 8.0$  Hz), 2.89 (1H, dd,  $J = 3.0, 13.0$  Hz), 2.96 (1H, dd,  $J = 8.0, 13.0$  Hz), 7.90 (2H,  $J = 8.0$  Hz), 7.28 (2H, d,  $J = 8.0$  Hz), 7.26 (1H, t,  $J = 8.0$  Hz);  $\delta_{\text{C}}$  172.5 (CO), 52.7, 34.5, 137.2, 129.0 (2C), 128.3 (2C), 126.6, NMe-Val:  $\delta_{\text{H}}$  5.03 (1H, d,  $J = 10.7$  Hz), 2.24 (1H, dq,  $J = 6.5, 6.5, 10.7$  Hz), 0.77 (3H, d,  $J = 6.5$  Hz), 0.73 (3H, d,  $J = 6.5$  Hz), 2.98 (3H, s, NMe);  $\delta_{\text{C}}$  168.9 (CO), 56.5, 26.3, 19.2, 18.4, NMe-Leu:  $\delta_{\text{H}}$  4.92 (1H, d,  $J = 7.0$  Hz), 1.20/2.08 (2H, m), 1.41 (1H, m), 0.92 (6H, d,  $J = 6.5$  Hz), 2.86 (3H, s, NMe);  $\delta_{\text{C}}$  168.0 (CO), 58.0, 38.0, 24.7, 22.5, 22.1,  $\beta$ -Ala:  $\delta_{\text{H}}$  7.35 (1H, t,  $J = 5.6$  Hz, NH), 2.50/2.65 (2H, m), 3.44/3.55 (2H, m);  $\delta_{\text{C}}$  173.1 (CO), 34.4, 35.4, 2-hydroxy-4-methylpentanoic acid:  $\delta_{\text{H}}$  5.22 (1H, d,  $J = 11.3$  Hz), 1.47/1.64 (2H, m), 1.41 (1H, m), 0.92 (3H, d,  $J = 6.5$  Hz), 0.88 (3H, d,  $J = 6.5$  Hz);  $\delta_{\text{C}}$  168.9 (CO), 72.6, 37.7, 24.7, 20.1, 23.2.  $\text{C}_{36}\text{H}_{55}\text{N}_5\text{O}_7$ , ESIMS  $m/z$  670.4243  $[\text{M}+\text{H}]^+$ .

Isaridin A (**20**): white powder;  $[\alpha]_{\text{D}}^{25} -72$  ( $c$  0.06, MeOH).  $^1\text{H}$  and  $^{13}\text{C}$  NMR (100 MHz, DMSO- $d_6$ ) data for Pro:  $\delta_{\text{H}}$  4.10 (1H, dd,  $J = 2.0, 7.0$  Hz), 1.97/2.07 (2H, m), 1.06/1.67 (2H, m), 3.26 (1H, m), 3.30 (1H, m);  $\delta_{\text{C}}$  171.1 (CO), 60.1, 31.4, 21.4, 46.7, Phe:  $\delta_{\text{H}}$  7.90 (1H, d,  $J = 7.8$  Hz, NH), 4.52 (1H, ddd,  $J = 3.0, 7.6, 7.8$  Hz), 2.87 (1H, dd,  $J = 3.0, 13.0$  Hz), 2.88 (1H, dd,  $J = 7.6, 13.0$  Hz), 7.90 (2H,  $J = 8.0$  Hz), 7.31 (2H, d,  $J = 8.0$  Hz), 7.26 (1H, t,  $J = 8.0$  Hz);  $\delta_{\text{C}}$  171.7 (CO), 53.0, 34.3, 137.5, 129.0 (2C), 128.5 (2C), 126.6, NMe-Val:  $\delta_{\text{H}}$  4.74 (1H, d,  $J = 10.7$  Hz), 2.03 (1H, dq,  $J = 6.5, 6.5, 10.7$  Hz), 0.71 (3H, d,  $J = 6.5$  Hz), 0.58 (3H, d,  $J = 6.5$  Hz), 2.88 (3H, s, NMe);  $\delta_{\text{C}}$  169.1 (CO), 56.3, 25.7, 18.1, 18.0, NMe-Phe:  $\delta_{\text{H}}$  5.14 (1H, dd,  $J = 6.0, 8.2$  Hz), 2.77 (1H, dd,  $J = 8.2, 12.0$  Hz), 3.50 (1H, dd,  $J = 6.0, 12.0$  Hz), 7.30 (2H, d,  $J = 8.0$  Hz), 7.26 (2H, d,  $J = 8.0$  Hz), 7.21 (1H, t,  $J = 8.0$  Hz), 2.81 (3H, s, NMe);  $\delta_{\text{C}}$  167.7 (CO), 62.0, 34.9, 137.9, 128.8 (2C), 128.2 (2C), 126.5, 29.5 (NMe),  $\beta$ -Ala:  $\delta_{\text{H}}$  7.53 (1H, t,  $J = 5.3$  Hz, NH), 2.50/2.59 (2H, m), 3.33/3.67 (2H, m);  $\delta_{\text{C}}$  173.3 (CO), 34.0, 35.6, 2-hydroxy-4-methylpentanoic acid:  $\delta_{\text{H}}$  5.30 (1H, dd,  $J = 1.2, 11.5$  Hz), 1.46/1.64 (2H, m), 1.87 (1H, m), 0.92 (3H, d,  $J = 6.5$  Hz), 0.98 (3H, d,  $J = 6.5$  Hz);  $\delta_{\text{C}}$  169.0 (CO), 72.5, 37.8, 21.4, 20.0, 23.3.  $\text{C}_{39}\text{H}_{53}\text{N}_5\text{O}_7$ , ESIMS  $m/z$  704.4279  $[\text{M}+\text{H}]^+$ .

Isariin G1 (**21**): white amorphous;  $[\alpha]_{\text{D}}^{25}$  -14 (*c* 0.06, MeOH).  $^1\text{H}$  and  $^{13}\text{C}$  NMR (100 MHz, DMSO-*d*<sub>6</sub>) data for Gly:  $\delta_{\text{H}}$  7.90 (1H, dd, *J* = 3.1, 5.5 Hz, NH), 3.44 (1H, dd, *J* = 3.1, 12.0 Hz), 4.12 (1H, *J* = 5.5, 12.0 Hz);  $\delta_{\text{C}}$  169.1 (CO), 42.0, Val<sup>1</sup>:  $\delta_{\text{H}}$  8.10 (1H, d, *J* = 7.1 Hz, NH), 4.00 (1H, dd, 6.5, 7.1 Hz), 1.86 (1H, m), 0.89 (3H, d, *J* = 6.5 Hz), 0.86 (3H, d, *J* = 6.5 Hz);  $\delta_{\text{C}}$  171.8 (CO), 58.9, 29.4, 23.0, 18.7, Leu:  $\delta_{\text{H}}$  8.65 (1H, d, *J* = 6.4 Hz, NH), 4.04 (1H, dt, *J* = 6.4, 6.5 Hz), 1.50 (2H, m), 1.63 (1H, m), 0.81 (3H, d, *J* = 6.5 Hz), 0.88 (3H, d, *J* = 6.5 Hz);  $\delta_{\text{C}}$  171.2 (CO), 51.7, 38.6, 24.1, 20.8, 19.1, Ala: 7.96 (1H, d, *J* = 6.4 Hz, NH), 4.19 (1H, dd, *J* = 6.4, 7.0 Hz), 1.22 (3H, d, *J* = 7.0 Hz);  $\delta_{\text{C}}$  172.0 (CO), 47.9, 17.2, Val<sup>2</sup>:  $\delta_{\text{H}}$  7.47 (1H, d, *J* = 6.2 Hz, NH), 3.96 (1H, dd, *J* = 6.2, 6.5 Hz), 2.06 (1H, m), 0.88 (3H, d, *J* = 6.5 Hz), 0.84 (3H, d, *J* = 6.5 Hz);  $\delta_{\text{C}}$  169.3 (CO), 58.2, 29.2, 17.8, 18.9, 3-hydroxydecanoic acid:  $\delta_{\text{H}}$  2.34 (1H, dd, *J* = 2.5, 14.0 Hz), 2.45 (1H, dd, *J* = 6.5, 14.0 Hz), 4.93 (1H, m), 1.23-1.25 (12H, m), 0.85 (3H, t, *J* = 6.5 Hz);  $\delta_{\text{C}}$  170.1 (CO), 40.0, 72.0, 22.0-33.2, 13.9. C<sub>31</sub>H<sub>55</sub>N<sub>5</sub>O<sub>7</sub>, ESIMS *m/z* 610.4227 [M+H]<sup>+</sup>.

Isariin G2 (**22**): white amorphous;  $[\alpha]_{\text{D}}^{25}$  -5 (*c* 0.06, MeOH).  $^1\text{H}$  and  $^{13}\text{C}$  NMR (100 MHz, DMSO-*d*<sub>6</sub>) data for Gly:  $\delta_{\text{H}}$  7.94 (1H, dd, *J* = 3.1, 5.5 Hz, NH), 3.45 (1H, dd, *J* = 3.1, 12.0 Hz,  $\alpha$ -Ha), 4.06 (1H, dd, *J* = 5.5, 12.0 Hz,  $\alpha$ -Hb);  $\delta_{\text{C}}$  169.0 (CO), 42.5, Val:  $\delta_{\text{H}}$  7.79 (1H, d, *J* = 7.1 Hz, NH), 4.09 (1H, dd, *J* = 6.0, 7.1 Hz), 1.23 (1H, dq, *J* = 6.0, 6.5, 6.5 Hz), 0.89 (3H, d, *J* = 6.5 Hz), 0.87 (3H, d, *J* = 6.5 Hz);  $\delta_{\text{C}}$  171.8 (CO), 58.2, 29.9, 22.9, 18.6, Leu:  $\delta_{\text{H}}$  8.64 (3H, d, *J* = 6.4 Hz, NH), 4.02 (1H, dt, *J* = 6.4, 6.5 Hz), 1.49 (2H, m), 1.64 (1H, m), 0.81 (3H, d, *J* = 6.5 Hz), 0.84 (3H, d, *J* = 6.5 Hz);  $\delta_{\text{C}}$  171.1 (CO), 51.9, 38.5, 24.1, 21.1, 19.0, Ala<sup>1</sup>:  $\delta_{\text{H}}$  7.99 (1H, d, *J* = 6.4 Hz, NH), 4.20 (1H, dq, *J* = 6.5, 7.0 Hz), 1.20 (3H, *J* = 7.0 Hz);  $\delta_{\text{C}}$  171.9 (CO), 47.5, 17.2, Ala<sup>2</sup>:  $\delta_{\text{H}}$  7.87 (1H, d, *J* = 6.4 Hz, NH), 4.07 (1H, dq, *J* = 6.4, 7.0 Hz), 1.30 (3H, d, *J* = 7.0 Hz);  $\delta_{\text{C}}$  171.7 (CO), 48.6, 16.4, 3-hydroxydodecanoic acid:  $\delta_{\text{H}}$  2.40 (2H, d, *J* = 6.0 Hz), 4.94 (1H, m), 0.90-1.25 (16H, m), 0.86 (3H, d, *J* = 6.0 Hz);  $\delta_{\text{C}}$  169.4 (CO), 39.5, 71.5, 22.9-33.4, 13.9. C<sub>31</sub>H<sub>55</sub>N<sub>5</sub>O<sub>7</sub>, ESIMS *m/z* 610.4227 [M+H]<sup>+</sup>.

Isoisariin B (**23**): white amorphous;  $[\alpha]_{\text{D}}^{25}$  -12 (*c* 0.06, MeOH).  $^1\text{H}$  and  $^{13}\text{C}$  NMR (100 MHz, DMSO-*d*<sub>6</sub>) data for Gly:  $\delta_{\text{H}}$  7.91 (1H, dd, *J* = 3.8, 6.7 Hz, NH), 3.44 (1H,

dd,  $J = 3.8, 14.0$  Hz), 4.09 (1H, dd,  $J = 6.7, 14.0$  Hz);  $\delta_{\text{C}}$  169.1 (CO), 41.9, Val<sup>1</sup>:  $\delta_{\text{H}}$  8.11 (1H, d,  $J = 7.6$  Hz), 4.04 (1H, dd,  $J = 6.5, 7.6$  Hz), 1.88 (1H, m), 0.86 (3H, d,  $J = 6.5$  Hz), 0.89 (3H, d,  $J = 6.5$  Hz);  $\delta_{\text{C}}$  171.7 (CO), 58.8, 29.5, 23.0, 18.7, Leu:  $\delta_{\text{H}}$  8.65 (1H, d,  $J = 6.5$  Hz, NH), 4.03 (1H, m), 1.42 (2H, m), 1.61 (1H, m), 0.81 (3H, d,  $J = 6.5$  Hz), 0.92 (3H, d,  $J = 6.5$  Hz);  $\delta_{\text{C}}$  171.3 (CO), 51.9, 38.7, 24.2, 21.0, 19.0, Ala:  $\delta_{\text{H}}$  7.97 (1H, d,  $J = 6.5$  Hz, NH), 4.19 (1H, dq,  $J = 6.5, 6.6$  Hz), 1.22 (3H, d,  $J = 6.6$  Hz);  $\delta_{\text{C}}$  171.9 (CO), 48.0, 17.3, Val<sup>2</sup>:  $\delta_{\text{H}}$  7.47 (1H, d,  $J = 7.7$  Hz, NH), 4.08 (1H, dd,  $J = 6.5, 7.7$  Hz), 2.07 (1H, m), 0.86 (3H, d,  $J = 6.5$  Hz), 0.88 (3H, d,  $J = 6.5$  Hz);  $\delta_{\text{C}}$  170.8 (CO), 57.7, 29.5, 17.5, 19.0, 2-hydroxy-3-methylheptanoic acid:  $\delta_{\text{H}}$  2.23 (1H, dd,  $J = 3.0, 14.0$  Hz), 2.52 (1H, dd,  $J = 6.0, 14.0$  Hz), 4.91 (1H, m), 1.67 (1H, m), 0.84 (3H, d,  $J = 6.5$  Hz), 1.02, 1.37 (2H, m), 1.17, 1.25 (2H, m), 1.25 (2H, m), 0.85 (3H, t,  $J = 6.5$  Hz);  $\delta_{\text{C}}$  169.9 (CO), 31.6, 75.5, 36.2, 14.8, 31.2, 28.9, 22.4, 13.9. C<sub>30</sub>H<sub>53</sub>N<sub>5</sub>O<sub>7</sub>, ESIMS  $m/z$  596.4350 [M+H]<sup>+</sup>.

Isariin E (**24**): white amorphous;  $[\alpha]_{\text{D}}^{25} -10$  ( $c$  0.06, MeOH). <sup>1</sup>H and <sup>13</sup>C NMR (100 MHz, DMSO-*d*<sub>6</sub>) data for Gly:  $\delta_{\text{H}}$  7.91 (1H, dd,  $J = 3.1, 5.5$  Hz, NH), 3.44 (1H, dd,  $J = 3.1, 14.0$  Hz), 4.12 (1H, dd,  $J = 5.5, 14.0$  Hz);  $\delta_{\text{C}}$  169.2 (CO), 42.0, Val<sup>1</sup>:  $\delta_{\text{H}}$  8.11 (1H, d,  $J = 7.1$  Hz), 4.00 (1H, dd,  $J = 6.5, 7.1$  Hz), 1.86 (1H, m), 0.89 (3H, d,  $J = 6.5$  Hz), 0.87 (3H, d,  $J = 6.5$  Hz);  $\delta_{\text{C}}$  171.8 (CO), 59.0, 29.4, 23.1, 18.7, Leu:  $\delta_{\text{H}}$  8.66 (1H, d,  $J = 6.4$  Hz, NH), 4.04 (1H, m), 1.50 (2H, m), 1.63 (1H, m), 0.80 (3H, d,  $J = 6.5$  Hz), 0.88 (3H, d,  $J = 6.5$  Hz);  $\delta_{\text{C}}$  171.2 (CO), 51.7, 38.6, 24.1, 20.8, 18.9, Ala:  $\delta_{\text{H}}$  7.97 (1H, d,  $J = 6.4$  Hz, NH), 4.19 (1H, dq,  $J = 6.4, 7.0$  Hz), 1.22 (1H, d,  $J = 7.0$  Hz);  $\delta_{\text{C}}$  172.0 (CO), 47.9, 17.3, Val<sup>2</sup>:  $\delta_{\text{H}}$  7.47 (1H, d,  $J = 7.1$  Hz, NH), 3.97 (1H, dd,  $J = 6.5, 7.1$  Hz), 2.06 (1H, m), 0.88 (3H, d,  $J = 6.5$  Hz), 0.88 (3H, d,  $J = 6.5$  Hz);  $\delta_{\text{C}}$  170.8 (CO), 58.2, 29.2, 17.9, 19.2, 3-hydroxyhexanoic acid:  $\delta_{\text{H}}$  2.35 (1H, dd,  $J = 3.0, 14.0$  Hz), 2.44 (1H, dd,  $J = 6.0, 14.0$  Hz), 4.94 (1H, m), 1.51 (2H, m), 1.26 (2H, m), 0.85 (3H, t,  $J = 6.5$  Hz);  $\delta_{\text{C}}$  169.3 (CO), 40.0, 71.9, 35.4, 17.8, 13.7. C<sub>27</sub>H<sub>47</sub>N<sub>5</sub>O<sub>7</sub>, ESIMS  $m/z$  554.3866 [M+H]<sup>+</sup>.

Nodupetide (**25**): white amorphous;  $[\alpha]_{\text{D}}^{25} -14$  ( $c$  0.06, MeOH). <sup>1</sup>H and <sup>13</sup>C NMR (100 MHz, DMSO-*d*<sub>6</sub>) data for Gly:  $\delta_{\text{H}}$  7.89 (1H, dd,  $J = 3.2, 4.8$  Hz, NH), 3.45 (1H,

dd,  $J = 3.2, 14.0$  Hz), 4.08 (1H, dd,  $J = 4.8, 14.0$  Hz);  $\delta_{\text{C}}$  169.1 (CO), 42.0, Val<sup>1</sup>:  $\delta_{\text{H}}$  8.08 (1H, d,  $J = 7.6$  Hz, NH), 4.05 (1H, dd,  $J = 6.5, 7.6$  Hz), 1.87 (1H, m), 0.89 (3H, d,  $J = 6.5$  Hz), 0.88 (3H, d,  $J = 6.5$  Hz);  $\delta_{\text{C}}$  171.7 (CO), 58.8, 29.5, 23.0, 18.7, Leu:  $\delta_{\text{H}}$  8.65 (1H, d,  $J = 6.4$  Hz, NH), 4.04 (1H, m), 1.49 (2H, m), 1.64 (1H, m), 0.81 (3H, d,  $J = 6.5$  Hz), 0.88 (3H, d,  $J = 6.5$  Hz);  $\delta_{\text{C}}$  171.2 (CO), 51.8, 38.6, 24.1, 21.0, 18.9, Ala:  $\delta_{\text{H}}$  7.99 (1H, d,  $J = 7.9$  Hz, NH), 4.19 (1H, dd,  $J = 6.5, 7.9$  Hz), 1.22 (3H, d,  $J = 6.5$  Hz);  $\delta_{\text{C}}$  171.9 (CO), 48.0, 17.4, Val<sup>2</sup>:  $\delta_{\text{H}}$  7.44 (1H, d,  $J = 6.9$  Hz, NH), 4.09 (1H, dd,  $J = 6.5, 6.9$  Hz), 2.08 (1H, m), 0.88 (3H, d,  $J = 6.5$  Hz), 0.89 (3H, d,  $J = 6.5$  Hz);  $\delta_{\text{C}}$  170.8 (CO), 57.7, 29.5, 17.6, 19.0, 3-hydroxy-4-methylhexanoic acid: 2.25 (1H, dd,  $J = 3.0, 14.0$  Hz), 2.52 (1H, dd,  $J = 6.5, 14.0$  Hz), 4.93 (1H, m), 1.60 (1H, m), 0.84 (3H, d,  $J = 6.0$  Hz), m), 1.06, 1.41 (2H, m), 0.85 (3H, t,  $J = 6.5$  Hz);  $\delta_{\text{C}}$  169.8 (CO), 37.7, 75.4, 38.0, 14.3, 24.5, 11.5. C<sub>28</sub>H<sub>49</sub>N<sub>5</sub>O<sub>7</sub>, ESIMS  $m/z$  568.3743 [M+H]<sup>+</sup>.

Isariin A (**26**): white amorphous;  $[\alpha]_{\text{D}}^{25} -32$  ( $c$  0.06, MeOH). <sup>1</sup>H and <sup>13</sup>C NMR (100 MHz, DMSO-*d*<sub>6</sub>) data for Gly:  $\delta_{\text{H}}$  7.90 (1H, dd,  $J = 3.1, 5.5$  Hz, NH), 3.45 (1H, dd,  $J = 3.1, 14.0$  Hz), 4.11 (1H, dd,  $J = 5.5, 14.0$  Hz);  $\delta_{\text{C}}$  169.1 (CO), 42.0, Val<sup>1</sup>:  $\delta_{\text{H}}$  8.08 (1H, d,  $J = 7.1$  Hz), 4.00 (1H, dd,  $J = 6.5, 7.1$  Hz), 1.87 (1H, m), 0.89 (3H, d,  $J = 6.5$  Hz), 0.87 (3H, d,  $J = 6.5$  Hz);  $\delta_{\text{C}}$  171.7 (CO), 58.9, 29.4, 23.0, 18.7, Leu:  $\delta_{\text{H}}$  8.64 (1H, d,  $J = 6.4$  Hz, NH), 4.03 (1H, m), 1.50 (2H, m), 1.23 (1H, m), 0.81 (3H, d,  $J = 6.5$  Hz), 0.87 (3H, d,  $J = 6.5$  Hz);  $\delta_{\text{C}}$  171.2 (CO), 51.7, 38.6, 24.1, 20.9, 18.9, Ala:  $\delta_{\text{H}}$  7.97 (1H, d,  $J = 6.4$  Hz, NH), 4.20 (1H, dq,  $J = 6.4, 7.0$  Hz), 1.22 (1H, d,  $J = 7.0$  Hz);  $\delta_{\text{C}}$  172.0 (CO), 47.9, 17.2, Val<sup>2</sup>:  $\delta_{\text{H}}$  7.49 (1H, d,  $J = 6.2$  Hz, NH), 3.96 (1H, dd,  $J = 6.2, 6.5$  Hz), 2.06 (1H, m), 0.86 (3H, d,  $J = 6.5$  Hz), 0.88 (3H, d,  $J = 6.5$  Hz);  $\delta_{\text{C}}$  170.8 (CO), 58.2, 29.2, 17.9, 19.1, 3-hydroxydodecanoic acid:  $\delta_{\text{H}}$  2.25 (1H, dd,  $J = 3.0, 14.0$  Hz), 2.45 (1H, dd,  $J = 6.0, 14.0$  Hz), 4.94 (1H, m), 1.23-1.63 (16H, m), 0.85 (3H, t,  $J = 6.5$  Hz);  $\delta_{\text{C}}$  169.3 (CO), 39.9, 72.0, 22.1-33.2, 13.9. C<sub>33</sub>H<sub>59</sub>N<sub>5</sub>O<sub>7</sub>, ESIMS  $m/z$  638.4532 [M+H]<sup>+</sup>.

SUPPORTING INFORMATION

**Table S1.** The  $^1\text{H}$  and  $^{13}\text{C}$  NMR data of **1** in  $\text{DMSO-}d_6$  ( $\delta$  in ppm) (600 MHz) (key  $^1\text{H}$ - $^1\text{H}$  COSY and HMBC correlations are shown below)

| No.         | $\delta_{\text{H}}$ (J in Hz) | $\delta_{\text{C}}$ | No.              | $\delta_{\text{H}}$ (J in Hz)                    | $\delta_{\text{C}}$ |
|-------------|-------------------------------|---------------------|------------------|--------------------------------------------------|---------------------|
| Acid        |                               | -                   | $\delta^1$       | 0.78, t (7.0)                                    | 11.1, $\text{CH}_3$ |
| CO          |                               | 168.5, C            | NH               | 6.88, d (9.4)                                    | -                   |
| $\alpha$    | 4.99, dd (5.0,10.0)           | 71.1, CH            | N-MeVal          |                                                  | -                   |
| $\beta$     | 1.74, ddd (4.0, 5.0,12.0)     | 33.3, $\text{CH}_2$ | CO               |                                                  | 170.5, C            |
| $\gamma$    | 2.11, td (10.0,12.0)          | 34.9, CH            | $\alpha$         | 5.00, d (12.0)                                   | 57.1, CH            |
| $\delta^2$  | 2.46, ddq (4.0,6.9,10.0)      | 17.2, $\text{CH}_3$ | $\beta$          | 2.18, dq (6.4,6.4,12.0)                          | 26.7, CH            |
| $\delta^1$  | 1.14, d (6.9)                 | 176.7, C            | $\gamma^1$       | 0.84, d (6.4)                                    | 19.1, $\text{CH}_3$ |
| MePro       |                               | -                   | $\gamma^2$       | 0.87, d (6.4)                                    | 19.1, $\text{CH}_3$ |
| CO          |                               | 170.3, C            | N- $\text{CH}_3$ | 3.13, s                                          | 30.5, $\text{CH}_3$ |
| $\alpha$    | 3.96, d (2.0)                 | 66.6, CH            | N-MeAla          |                                                  | -                   |
| $\beta$     | 2.47, m                       | 36.4, CH            | CO               |                                                  | 169.0, C            |
| $\beta$ -Me | 1.05, d (7.0)                 | 18.7, $\text{CH}_3$ | $\alpha$         | 5.17, q (6.6)                                    | 54.8, CH            |
| $\gamma$    | 1.64, m; 1.94, m              | 30.5, $\text{CH}_2$ | $\beta$          | 1.17, d (6.6)                                    | 15.4, $\text{CH}_3$ |
| $\delta$    | 3.68, m; 3.77, m              | 44.7, $\text{CH}_2$ | N- $\text{CH}_3$ | 2.54, s                                          | 27.7, $\text{CH}_3$ |
| Ile         |                               | -                   | Ala              |                                                  | -                   |
| CO          |                               | 173.1, C            | CO               |                                                  | 173.2, C            |
| $\alpha$    | 4.76, dd (6.7, 9.4)           | 52.5, CH            | $\alpha$         | 2.35, dd (11.1, 18.2) ;<br>2.75, dd (4.0, 18.0)  | 34.0, $\text{CH}_2$ |
| $\beta$     | 1.83, m                       | 36.9, CH            | $\beta$          | 2.93, ddd (2.0,11.0,11.1)<br>3.85, dt (4.0,11.0) | 32.9, $\text{CH}_2$ |
| $\gamma^2$  | 0.77, d (5.6)                 | 15.1, CH            | NH               | 8.09, dd (2.0, 11.0)                             |                     |
| $\gamma^1$  | 1.23, m; 1.39, m              | 23.9, $\text{CH}_2$ |                  |                                                  |                     |

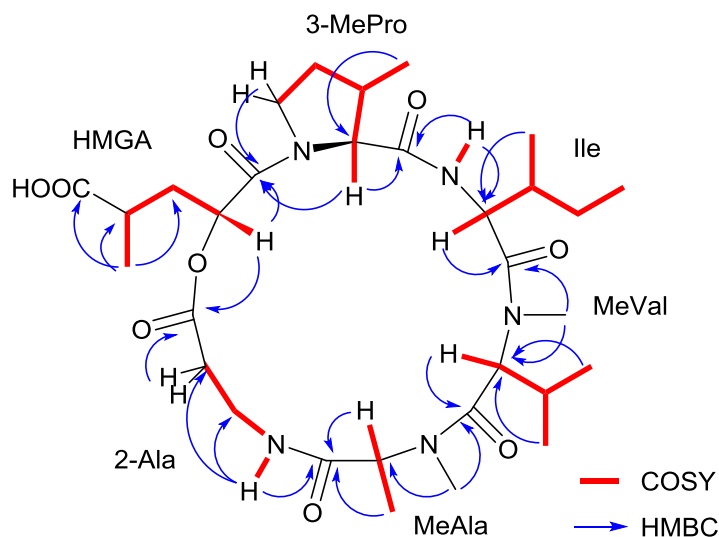



SUPPORTING INFORMATION

**Table S2.** The  $^1\text{H}$  and  $^{13}\text{C}$  NMR data of **2** in  $\text{DMSO-}d_6$  ( $\delta$  in ppm) (600 MHz) (key  $^1\text{H}$ - $^1\text{H}$  COSY and HMBC correlations are shown below)

| No.         | $\delta_{\text{H}}$ (J in Hz) | $\delta_{\text{C}}$ | No.              | $\delta_{\text{H}}$ (J in Hz) | $\delta_{\text{C}}$ |
|-------------|-------------------------------|---------------------|------------------|-------------------------------|---------------------|
| Acid        |                               | -                   | $\delta^1$       | 0.77, t (7.0)                 | 11.2, $\text{CH}_3$ |
| CO          |                               | 168.7, C            | NH               | 6.86, d (9.4)                 | -                   |
| $\alpha$    | 4.96, dd (2.0, 11.0)          | 71.7, CH            | N-MeVal          | -                             | -                   |
|             | 1.74, ddd (2.0,               |                     |                  |                               |                     |
| $\beta$     | 11.0,12.0)                    | 33.4, $\text{CH}_2$ | CO               | -                             | 170.5, C            |
|             | 1.95, ddd (4.0,11.0,12.0)     |                     |                  |                               |                     |
| $\gamma$    | 2.57, m                       | 34.9, CH            | $\alpha$         | 4.99, m                       | 57.1, CH            |
| $\delta^2$  | 1.15, d (6.9)                 | 17.8, $\text{CH}_3$ | $\beta$          | 2.18, m                       | 26.6, CH            |
| $\delta^1$  |                               | 176.6, C            | $\gamma^1$       | 0.83, d (6.4)                 | 19.1, $\text{CH}_3$ |
| MePro       |                               | -                   | $\gamma^2$       | 0.87, d (6.4)                 | 19.1, $\text{CH}_3$ |
| CO          |                               | 170.2, C            | N- $\text{CH}_3$ | 3.13, brs                     | 30.5, $\text{CH}_3$ |
| $\alpha$    | 3.97, m                       | 66.3, CH            | N-MeAla          | -                             | -                   |
| $\beta$     | 2.46, m                       | 36.6, CH            | CO               | -                             | 169.0, C            |
| $\beta$ -Me | 1.03, d (7.0)                 | 18.7, $\text{CH}_3$ | $\alpha$         | 5.17, q (6.6)                 | 54.7, CH            |
| $\gamma$    | 1.69, m; 1.95, m              | 30.5, $\text{CH}_2$ | $\beta$          | 1.16, d (6.6)                 | 15.4, $\text{CH}_3$ |
| $\delta$    | 3.68, m; 3.75, m              | 44.6, $\text{CH}_2$ | N- $\text{CH}_3$ | 2.54, s                       | 27.7, $\text{CH}_3$ |
| Ile         |                               | -                   | Ala              | -                             | -                   |
| CO          |                               | 173.0, C            | CO               | -                             | 173.3, C            |
| $\alpha$    | 4.74, dd (6.7, 9.3)           | 52.5, CH            | $\alpha$         | 2.35, dd (11.1, 18.0)         | 34.0, $\text{CH}_2$ |
|             |                               |                     |                  | 2.78, dd (4.0, 18.0)          |                     |
| $\beta$     | 1.84, m                       | 36.7, CH            | $\beta$          | 2.92, ddd (2.0,11.0,11.5)     | 32.9, $\text{CH}_2$ |
|             |                               |                     |                  | 3.84, ddd (4.0,11.0,11.5)     |                     |
| $\gamma^2$  | 0.76, d (5.6)                 | 15.1, CH            | NH               | 8.07, dd (2.0, 11.0)          | -                   |
| $\gamma^1$  | 1.22, m; 1.39, m              | 23.9, $\text{CH}_2$ |                  |                               |                     |

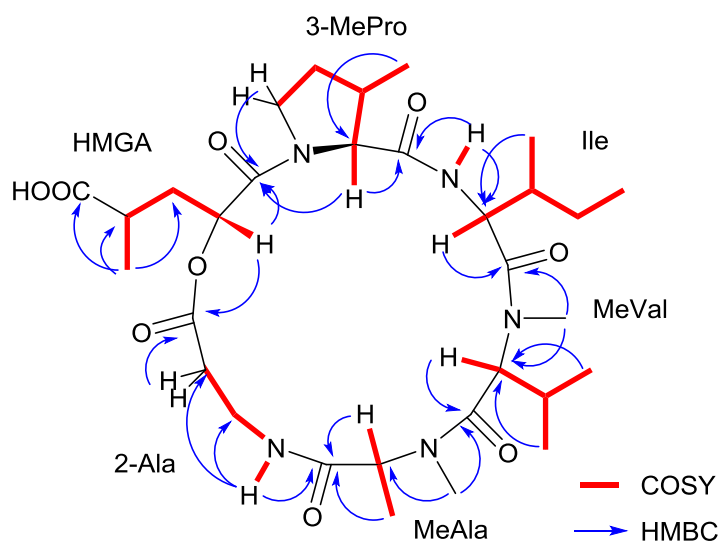

SUPPORTING INFORMATION

**Table S3.** The  $^1\text{H}$  and  $^{13}\text{C}$  NMR data of **3** in  $\text{DMSO-}d_6$  ( $\delta$  in ppm) (600 MHz) (key  $^1\text{H}$ - $^1\text{H}$  COSY and HMBC correlations are shown below)

| No.                     | $\delta_{\text{H}}$ ( $J$ in Hz) | $\delta_{\text{C}}$ | No.              | $\delta_{\text{H}}$ ( $J$ in Hz) | $\delta_{\text{C}}$ |
|-------------------------|----------------------------------|---------------------|------------------|----------------------------------|---------------------|
| Acid                    |                                  | -                   | $\gamma^1$       | 1.23, m; 1.37, m                 | 23.7, $\text{CH}_2$ |
| CO                      |                                  | 169.1, C            | $\delta^1$       | 0.78, t (7.0)                    | 11.2, $\text{CH}_3$ |
| $\alpha$                | 5.10, dd (5.8, 9.0)              | 71.0, CH            | NH               | 6.93, d (9.5)                    | -                   |
| $\beta$                 | 1.75, m; 1.97, m                 | 33.4, $\text{CH}_2$ | N-MeVal          | -                                | -                   |
| $\gamma$                | 3.36, m                          | 34.9, CH            | CO               | -                                | 170.5, C            |
| $\gamma$ -OH            | 4.98, m                          | -                   | $\alpha$         | 5.03, d (10.9)                   | 57.1, CH            |
| $\delta$                | 3.17, m; 3.27, m                 | 65.8, C             | $\beta$          | 2.18, m                          | 26.3, CH            |
| $\delta$ -OH            | 4.68, m                          | -                   | $\gamma^1$       | 0.84, d (6.4)                    | 19.1, $\text{CH}_3$ |
| MePro                   | -                                | -                   | $\gamma^2$       | 0.87, d (6.4)                    | 19.1, $\text{CH}_3$ |
| CO                      | -                                | 170.2, C            | N- $\text{CH}_3$ | 3.13, brs                        | 30.5, $\text{CH}_3$ |
| $\alpha$                | 4.00, m                          | 66.6, CH            | N-MeAla          | -                                | -                   |
| $\beta$                 | 2.46, m                          | 36.6, CH            | CO               | -                                | 169.0, C            |
| $\beta$ - $\text{CH}_3$ | 1.03, d (7.0)                    | 18.8, $\text{CH}_3$ | $\alpha$         | 5.16, q (6.6)                    | 54.8, CH            |
| $\gamma$                | 1.65, m; 1.93, m                 | 30.2, $\text{CH}_2$ | $\beta$          | 1.17, d (6.6)                    | 15.4, $\text{CH}_3$ |
| $\delta$                | 3.76, m; 3.98, m                 | 44.5, $\text{CH}_2$ | N- $\text{CH}_3$ | 2.54, brs                        | 27.7, $\text{CH}_3$ |
| Ile                     | -                                | -                   | Ala              | -                                | -                   |
| CO                      | -                                | 173.0, C            | CO               | -                                | 173.4, C            |
| $\alpha$                | 4.81, dd (6.4, 9.4)              | 52.4, CH            | $\alpha$         | 2.34, m; 2.77, m                 | 34.2, $\text{CH}_2$ |
| $\beta$                 | 1.82, m                          | 36.7, CH            | $\beta$          | 2.94, m; 3.84, m                 | 32.9, $\text{CH}_2$ |
| $\gamma^2$              | 0.76, d (5.6)                    | 15.2, CH            | NH               | 8.10, dd (2.3, 9.8)              | -                   |

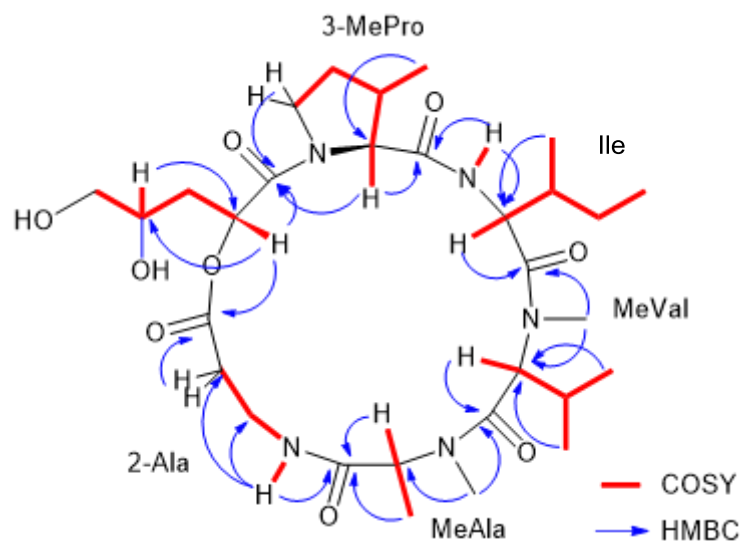

**Table S4.** The  $^1\text{H}$  and  $^{13}\text{C}$  NMR data of **4** in  $\text{DMSO-}d_6$  ( $\delta$  in ppm) (600 MHz) (key  $^1\text{H}$ - $^1\text{H}$  COSY and HMBC correlations are shown below)

| No.                     | $\delta_{\text{H}}$ ( $J$ in Hz) | $\delta_{\text{C}}$ | No.              | $\delta_{\text{H}}$ ( $J$ in Hz) | $\delta_{\text{C}}$ |
|-------------------------|----------------------------------|---------------------|------------------|----------------------------------|---------------------|
| Acid                    | -                                | -                   | $\gamma^1$       | 1.25, m; 1.40, m                 | 23.9, $\text{CH}_2$ |
| CO                      | -                                | 169.4, C            | $\delta^1$       | 0.78, m                          | 11.2, $\text{CH}_3$ |
| $\alpha$                | 5.12, dd (3.0, 10.1)             | 70.4, CH            | NH               | 6.92, d (9.4)                    | -                   |
| $\beta$                 | 1.52, m; 1.93, m                 | 34.7, $\text{CH}_2$ | N-MeVal          | -                                | -                   |
| $\gamma$                | 3.60, m                          | 67.3, CH            | CO               | -                                | 170.5, C            |
| $\gamma$ -OH            | 4.83, m                          | -                   | $\alpha$         | 4.99, d (11.0)                   | 57.1, CH            |
| $\delta$                | 3.25, m; 3.37, m                 | 65.7, C             | $\beta$          | 2.19, m                          | 26.7, CH            |
| $\delta$ -OH            | 4.64, m                          | -                   | $\gamma^1$       | 0.84, d (6.4)                    | 19.1, $\text{CH}_3$ |
| MePro                   | -                                | -                   | $\gamma^2$       | 0.87, d (6.4)                    | 19.1, $\text{CH}_3$ |
| CO                      | -                                | 170.3, C            | N- $\text{CH}_3$ | 3.13, brs                        | 30.5, $\text{CH}_3$ |
| $\alpha$                | 3.98, m                          | 66.3, CH            | N-MeAla          | -                                | -                   |
| $\beta$                 | 2.47, m                          | 36.5, CH            | CO               | -                                | 169.0, C            |
| $\beta$ - $\text{CH}_3$ | 1.03, d (7.1)                    | 18.7, $\text{CH}_3$ | $\alpha$         | 5.18, q (6.6)                    | 54.8, CH            |
| $\gamma$                | 1.68, m; 1.95, m                 | 30.5, $\text{CH}_2$ | $\beta$          | 1.17, d (6.6)                    | 15.4, $\text{CH}_3$ |
| $\delta$                | 3.71, m                          | 44.6, $\text{CH}_2$ | N- $\text{CH}_3$ | 2.54, brs                        | 27.7, $\text{CH}_3$ |
| Ile                     | -                                | -                   | Ala              | -                                | -                   |
| CO                      | -                                | 173.1, C            | CO               | -                                | 173.4, C            |
| $\alpha$                | 4.75, dd (6.9, 9.3)              | 52.5, CH            | $\alpha$         | 2.37, m; 2.76, m                 | 34.0, $\text{CH}_2$ |
| $\beta$                 | 1.86, m                          | 36.8, CH            | $\beta$          | 2.94, t (12.3);<br>3.87, m       | 32.9, $\text{CH}_2$ |
| $\gamma^2$              | 0.77, m                          | 15.1, CH            | NH               | 8.10, dd (2.2, 9.9)              | -                   |

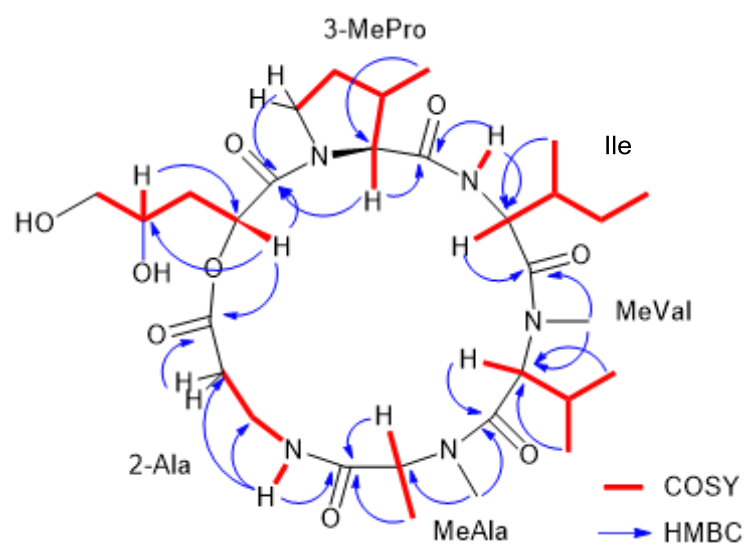

**Table S5.** The  $^1\text{H}$  and  $^{13}\text{C}$  NMR data of **5** in  $\text{DMSO-}d_6$  ( $\delta$  in ppm) (600 MHz) (key  $^1\text{H}$ - $^1\text{H}$  COSY and HMBC correlations are shown below)

| No.                     | $\delta_{\text{H}}$ ( $J$ in Hz) | $\delta_{\text{C}}$ | No.              | $\delta_{\text{H}}$ ( $J$ in Hz) | $\delta_{\text{C}}$ |
|-------------------------|----------------------------------|---------------------|------------------|----------------------------------|---------------------|
| Acid                    | -                                | -                   | $\delta^1$       | 0.78, t (7.0)                    | 11.1, $\text{CH}_3$ |
| CO                      | -                                | 169.3, C            | NH               | 6.93, d (9.3)                    | -                   |
| $\alpha$                | 5.10, m                          | 72.0, CH            | N-MeVal          | -                                | -                   |
| $\beta$                 | 1.56, m; 1.71, m                 | 34.0, $\text{CH}_2$ | CO               | -                                | 170.5, C            |
| $\gamma$                | 1.70, m                          | 31.5, CH            | $\alpha$         | 4.98, m                          | 57.1, CH            |
| $\delta^2$              | 0.91, d (6.5)                    | 17.8, $\text{CH}_3$ | $\beta$          | 2.19, m                          | 26.6, CH            |
| $\delta^1$              | 3.28, m; 3.25, m                 | 65.4, $\text{CH}_2$ | $\gamma^1$       | 0.84, d (6.4)                    | 19.1, $\text{CH}_3$ |
| MePro                   | -                                | -                   | $\gamma^2$       | 0.87, d (6.4)                    | 19.1, $\text{CH}_3$ |
| CO                      | -                                | 170.2, C            | N- $\text{CH}_3$ | 3.13, brs                        | 30.5, $\text{CH}_3$ |
| $\alpha$                | 3.97, m                          | 66.4, CH            | N-MeAla          | -                                | -                   |
| $\beta$                 | 2.48, m                          | 36.4, CH            | CO               | -                                | 169.0, C            |
| $\beta$ - $\text{CH}_3$ | 1.03, d (7.0)                    | 18.6, $\text{CH}_3$ | $\alpha$         | 5.17, q (6.6)                    | 54.7, CH            |
| $\gamma$                | 1.66, m; 1.93, m                 | 30.4, $\text{CH}_2$ | $\beta$          | 1.17, d (6.6)                    | 15.4, $\text{CH}_3$ |
| $\delta$                | 3.66, m; 3.76, m                 | 44.6, $\text{CH}_2$ | N- $\text{CH}_3$ | 2.54, brs                        | 27.7, $\text{CH}_3$ |
| Ile                     | -                                | -                   | Ala              | -                                | -                   |
| CO                      | -                                | 173.0, C            | CO               | -                                | 173.0, C            |
| $\alpha$                | 4.75, dd (6.7, 9.2)              | 52.7, CH            | $\alpha$         | 2.36, m; 2.76, m                 | 34.0, $\text{CH}_2$ |
| $\beta$                 | 1.85, m                          | 36.7, CH            | $\beta$          | 2.93, m; 3.86, dd                | 32.9, $\text{CH}_2$ |
| $\gamma^2$              | 0.77, d (5.6)                    | 15.1, CH            | NH               | 8.09, dd (2.2, 9.8)              | -                   |
| $\gamma^1$              | 1.25, m; 1.40, m                 | 23.9, $\text{CH}_2$ |                  |                                  |                     |

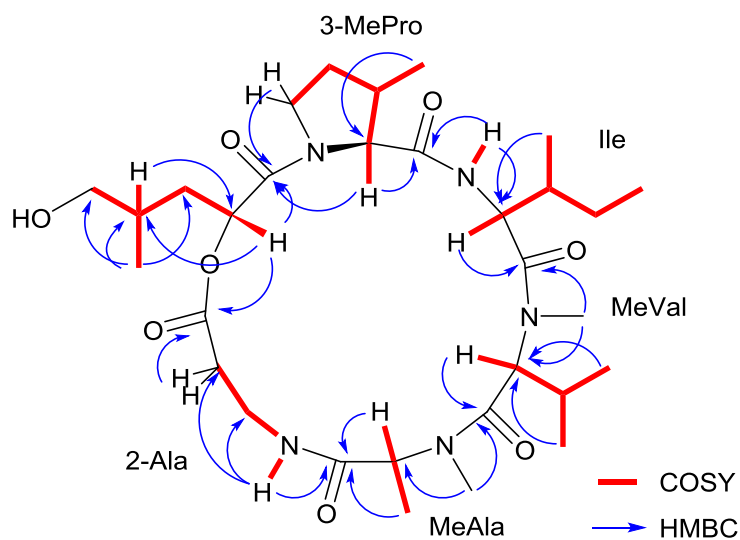

**Table S6.** The  $^1\text{H}$  and  $^{13}\text{C}$  NMR data of **6** in  $\text{DMSO-}d_6$  ( $\delta$  in ppm) (600 MHz) (key  $^1\text{H}$ - $^1\text{H}$  COSY and HMBC correlations are shown below)

| No.        | $\delta_{\text{H}}$ ( $J$ in Hz) | $\delta_{\text{C}}$ | No.              | $\delta_{\text{H}}$ ( $J$ in Hz) | $\delta_{\text{C}}$ |
|------------|----------------------------------|---------------------|------------------|----------------------------------|---------------------|
| Leu        | -                                | -                   | NH               | 8.96, d (8.0)                    | -                   |
| CO         | -                                | 172.5, C            | N-MeVal          | -                                | -                   |
| $\alpha$   | 4.51, m                          | 51.4, CH            | CO               | -                                | 169.0, C            |
| $\beta$    | 1.56, m; 1.29, m                 | 37.7, $\text{CH}_2$ | $\alpha$         | 4.75, d (10.6)                   | 56.5, CH            |
| $\gamma$   | 1.91, m                          | 24.2, CH            | $\beta$          | 2.03, m                          | 25.8, CH            |
| $\delta^1$ | 0.88, d (6.6)                    | 19.8, $\text{CH}_3$ | $\gamma^1$       | 0.56, d (6.5)                    | 18.1, $\text{CH}_3$ |
| $\delta^2$ | 0.97, d (6.7)                    | 23.6, $\text{CH}_3$ | $\gamma^2$       | 0.11, d (6.4)                    | 17.8, $\text{CH}_3$ |
| NH         | 8.33, d (2.5)                    | -                   | N- $\text{CH}_3$ | 2.54, brs                        | 40.4, $\text{CH}_3$ |
| Pro        | -                                | -                   | N-MePhe          | -                                | -                   |
| CO         | -                                | 171.9, C            | CO               | -                                | 168.0, C            |
| $\alpha$   | 4.08, dd (1.0, 8.4)              | 60.2, CH            | $\alpha$         | 5.19, dd (6.0, 8.1)              | 61.1, CH            |
| $\beta$    | 2.01, m; 2.05, m                 | 31.5, $\text{CH}_2$ | $\beta$          | 2.83, m; 3.28, m                 | 35.4, $\text{CH}_2$ |
| $\gamma$   | 1.09, m; 1.67, m                 | 21.6, $\text{CH}_2$ | $\gamma$         | -                                | 137.8, C            |
| $\delta$   | 3.26, m; 3.30, m                 | 46.6, $\text{CH}_2$ | $\delta$         | 7.30, m                          | 128.6, CH           |
| Phe        | -                                | -                   | $\epsilon$       | 7.26, m                          | 128.1, CH           |
| CO         | -                                | 172.5, C            | $\zeta$          | 7.21, m                          | 126.4, CH           |
| $\alpha$   | 4.50, m                          | 53.2, CH            | N- $\text{CH}_3$ | 2.89, brs                        | 29.1, $\text{CH}_3$ |
| $\beta$    | 2.86, m; 2.99, m                 | 34.2, $\text{CH}_2$ | Ala              | -                                | -                   |
| $\gamma$   | -                                | 137.6, C            | CO               | -                                | 171.5, C            |
| $\delta$   | 7.31, m                          | 129.1, CH           | $\alpha$         | 2.23, m; 2.41, m                 | 34.5, $\text{CH}_2$ |
| $\epsilon$ | 7.26, m                          | 128.5, CH           | $\beta$          | 3.32, m; 3.54, m                 | 35.4, $\text{CH}_2$ |
| $\zeta$    | 7.22, m                          | 126.7, CH           | NH               | 8.33, d (2.5)                    | -                   |

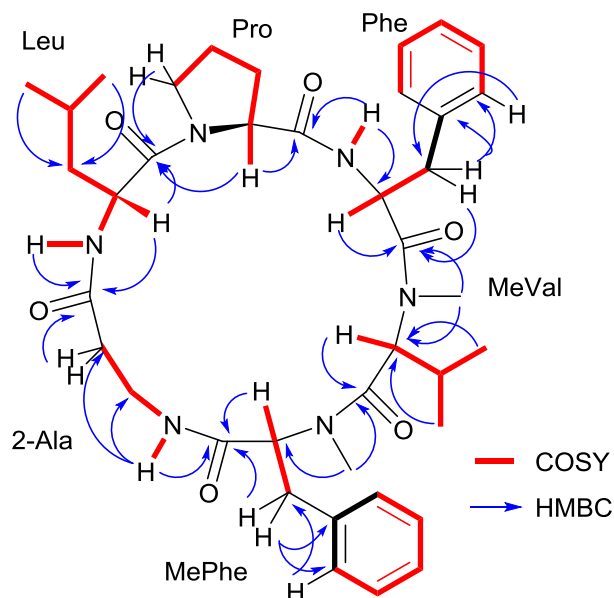

**Table S7.** The  $^1\text{H}$  and  $^{13}\text{C}$  NMR data of **7** in  $\text{DMSO-}d_6$  ( $\delta$  in ppm) (600 MHz) (key  $^1\text{H}$ - $^1\text{H}$  COSY and HMBC correlations are shown below)

| No.        | $\delta_{\text{H}}$ ( $J$ in Hz) | $\delta_{\text{C}}$ | No.        | $\delta_{\text{H}}$ ( $J$ in Hz) | $\delta_{\text{C}}$ |
|------------|----------------------------------|---------------------|------------|----------------------------------|---------------------|
| Acid       | -                                | -                   | NH         | 7.81, m                          | -                   |
| 1          | -                                | 169.7, C            | Leu        | -                                | -                   |
| 2          | 2.25, m; 2.54, m                 | 37.2, $\text{CH}_2$ | CO         | -                                | 171.1, C            |
| 3          | 4.96, d (7.4)                    | 74.5, CH            | $\alpha$   | 4.02, m                          | 51.9, CH            |
| 4          | 1.64, m                          | 36.2, CH            | $\beta$    | 1.48, m                          | 38.6, $\text{CH}_2$ |
| 5          | 0.81, m                          | 14.6, $\text{CH}_3$ | $\gamma$   | 1.62, m                          | 24.1, CH            |
| 6          | 1.00, m; 1.33, m                 | 31.5, $\text{CH}_2$ | $\delta^1$ | 0.81, m                          | 21.1, $\text{CH}_3$ |
| 7          | 1.24, m                          | 28.7, $\text{CH}_2$ | $\delta^2$ | 0.89, m                          | 22.9, $\text{CH}_3$ |
| 8          | 1.23, m                          | 22.3, $\text{CH}_2$ | NH         | 8.65, d (4.9)                    | -                   |
| 9          | 0.86, m                          | 13.9, $\text{CH}_3$ | Ala        | -                                | -                   |
| Gly        | -                                | -                   | CO         | -                                | 171.7, C            |
| CO         | -                                | 169.0, C            | $\alpha$   | 4.18, m                          | 47.6, CH            |
| $\alpha$   | 3.41, m; 4.10, m                 | 42.3, $\text{CH}_2$ | $\beta$    | 1.19, m                          | 17.3, $\text{CH}_3$ |
| NH         | 7.88, m                          | -                   | NH         | 7.96, d (7.6)                    | -                   |
| Val        | -                                | -                   | Ala        | -                                | -                   |
| CO         | -                                | 171.7, C            | CO         | -                                | 171.7, C            |
| $\alpha$   | 4.10, m                          | 58.2, CH            | $\alpha$   | 4.07, m                          | 48.3, CH            |
| $\beta$    | 1.85, m                          | 30.0, CH            | $\beta$    | 1.29, m                          | 16.6, $\text{CH}_3$ |
| $\gamma^1$ | 0.87, m                          | 18.9, $\text{CH}_3$ | NH         | 7.79, m                          | -                   |
| $\gamma^2$ | 0.83, m                          | 18.7, $\text{CH}_3$ |            |                                  |                     |

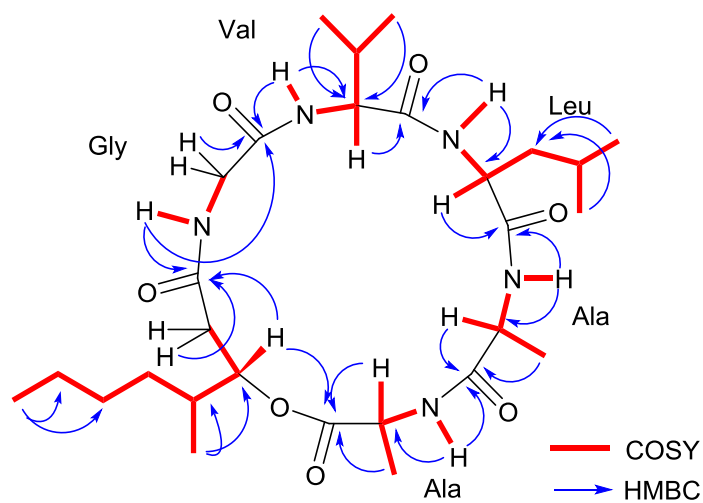

SUPPORTING INFORMATION

**Table S8.** Clusters encoding nonribosomal peptide synthases (NRPSs) (excluding PKS/NRPS hybrids) in *B. felina* SX-6-22

| Clusters | NRPS modules organization                                               | NRPSs in this study | Accession numbers of homologues | Hosts of the homologues               |
|----------|-------------------------------------------------------------------------|---------------------|---------------------------------|---------------------------------------|
| 1        | AT-C                                                                    |                     | OBT62387.1                      | <i>Pseudogymnoascus</i> sp.           |
| 2        | CAT-C                                                                   |                     | KPM39273.1                      | <i>Neonectria ditissima</i>           |
| 3        | AT-CATE-CAT-CAT-CA(MT)T-CA(MT)T-C                                       | DetxA               | KND86507.1                      | <i>Tolypocladium ophioglossoide</i>   |
| 4        | AT-CTC                                                                  |                     | KFH48348.1                      | <i>Acremonium chrysogenum</i>         |
| 5        | AT(Te)                                                                  |                     | RYP68643.1                      | <i>Monosporascus</i> sp.              |
| 6        | AT(Te)                                                                  |                     | OTB16444.1                      | <i>Daldinia</i> sp.                   |
| 7        | T-CAT-C                                                                 |                     | KPM35145.1                      | <i>Neonectria ditissima</i>           |
| 8        | AT(Te)                                                                  |                     | POR35295.1                      | <i>Tolypocladium paradoxum</i>        |
| 9        | A-CAT-CT-CACT-C                                                         |                     | KFH43976.1                      | <i>Acremonium chrysogenum</i>         |
| 10       | T-CATE-CAT-CATE-CAT-CAT-C                                               | IsrA                | KFX41393.1                      | <i>Talaromyces marneffeii</i>         |
| 11       | AT-CATE-CAT-CAT-CA(MT)T-CA(MT)T-C                                       | IsdA                | KND86507.1                      | <i>Tolypocladium ophioglossoide</i>   |
| 12       | ATE-CAT-CAT-C                                                           |                     | OJJ41173.1                      | <i>Aspergillus wentii</i>             |
| 13       | Ox-AC                                                                   |                     | KAF5494064.1                    | <i>Colletotrichum fructicola</i>      |
| 14       | CAT-CAT-CATE-CATE-CAT-CT-C                                              |                     | PKS08582.1                      | <i>Lomentospora prolificans</i>       |
| 15       | AT(Te)                                                                  |                     | RYP11740.1                      | <i>Monosporascus</i> sp.              |
| 16       | ATR                                                                     |                     | EKG19785.1                      | <i>Macrophomina phaseolina</i>        |
| 17       | TCA                                                                     |                     | EOD43397.1                      | <i>Neofusicoccum parvum</i>           |
| 18       | TCA                                                                     |                     | KND92421.1                      | <i>Tolypocladium ophioglossoide</i>   |
| 19       | CAT-CAT-C                                                               |                     | PYI02181.1                      | <i>Aspergillus sclerotiicarbona</i>   |
| 20       | CAT-CA(MT)T-CA(MT)T-CA(MT)T-CA(MT)T-CAT-CA(MT)T-CMT)T-CAT-CA(MT)T-CAT-C |                     | CAA82227.1                      | <i>Tolypocladium inflatum</i>         |
| 21       | ATR                                                                     |                     | OLN95656.1                      | <i>Colletotrichum chlorophyti</i>     |
| 22       | CAT-CAT-CAT-C                                                           |                     | KFH45129.1                      | <i>Acremonium chrysogenum</i>         |
| 23       | CAT-CAT-CAT-CAT-C                                                       |                     | XP_033604383.1                  | <i>Pseudovirgaria hyperparasitica</i> |

SUPPORTING INFORMATION

**Table S9.** Gene annotation for *detx*, *isd* and *isr* clusters

| Clusters    | Name/ID           | Size (bp/aa) | Accession numbers | Predicted functions                             | Accession numbers of homologues | Identity/similarity (%) |
|-------------|-------------------|--------------|-------------------|-------------------------------------------------|---------------------------------|-------------------------|
|             | <i>BFSX_00493</i> | 1111/346     | MW271810          | Zinc-type alcohol dehydrogenase-like protein    | KFH42175                        | 78/86                   |
|             | <i>BFSX_00492</i> | 2317/730     | MW271809          | $\alpha$ -1,2-Mannosidase                       | PNY25799                        | 65/73                   |
|             | <i>BFSX_00491</i> | 783/261      | MW271808          | Putative esterase                               | XP_035318235                    | 67/78                   |
|             | <i>BFSX_00490</i> | 1206/367     | MW271807          | Hypothetical protein                            | KFA76960                        | 28/34                   |
|             | <i>BFSX_00487</i> | 1653/551     | MW271806          | pH signal transduction protein                  | POR32663                        | 70/81                   |
| <i>detx</i> | <i>detxA</i>      | 24105/8002   | MT990934          | Destruxins-like nonribosomal peptide synthetase | KND86507                        | 69/81                   |
|             | <i>detxB</i>      | 2441/573     | MT990935          | Aldo/keto reductase                             | XP_007826234                    | 76/87                   |
|             | <i>detxC</i>      | 1608/513     | MT990936          | Cytochrome P450 monooxygenase                   | KAF5121804                      | 81/90                   |
|             | <i>detxD</i>      | 3945/1295    | MT990937          | ABC multidrug transporter Mdr1                  | KFG77710                        | 69/83                   |
|             | <i>detxE</i>      | 1229/377     | MT990938          | 2-oxoglutarate-Fe(II) type oxidoreductase       | TVY12977                        | 43/58                   |
|             | <i>BFSX_00481</i> | 2759/849     | MW271815          | pH-response regulator protein palA              | KFH40867                        | 84/91                   |
|             | <i>BFSX_00480</i> | 1595/494     | MW271814          | Flotillin domain-containing protein             | XP_018146344                    | 72/80                   |
|             | <i>BFSX_00478</i> | 1037/326     | MW271813          | Kinase-like domain                              | KAF4462691                      | 53/60                   |
|             | <i>BFSX_00477</i> | 2029/646     | MW271812          | UDP-glucose 4-epimerase                         | PNY28365                        | 47/55                   |
|             | <i>BFSX_00476</i> | 1380/460     | MW271811          | 3'(2'), 5'-bisphosphate nucleotidase            | XP_035318213                    | 62/71                   |
| <i>isd</i>  | <i>BFSX_04284</i> | 2241/691     | MW271825          | Calcium channel-like protein                    | KFH43535                        | 70/78                   |
|             | <i>BFSX_04283</i> | 1463/466     | MW271824          | Glycoside hydrolase superfamily                 | KXJ88434                        | 58/69                   |



SUPPORTING INFORMATION

|                |                   |            |          |                                                    |              |       |
|----------------|-------------------|------------|----------|----------------------------------------------------|--------------|-------|
|                | <i>BFSX_04282</i> | 1015/321   | MW271823 | Putative membrane protein-like protein             | KFH45179     | 72/81 |
|                | <i>BFSX_04281</i> | 3107/892   | MW271822 | SH3 domain-containing protein                      | XP_008098738 | 71/80 |
|                | <i>BFSX_04280</i> | 1624/503   | MW271821 | Leucine permease transcriptional regulator         | KAF4458932   | 73/82 |
|                | <i>isdA</i>       | 24258/8044 | MT990939 | Destruxins-like nonribosomal peptide synthetase    | KND86507     | 65/78 |
|                | <i>isdB</i>       | 1413/385   | MT990940 | Aldo/keto reductase                                | XP_007826234 | 68/77 |
|                | <i>BFSX_04277</i> | 2008/653   | MW271820 | Vacuolar protein-sorting-associated protein        | TVY72203     | 73/82 |
|                | <i>BFSX_04276</i> | 1140/380   | MW271819 | CENP-B homolog protein                             | GFP57757     | 79/90 |
|                | <i>BFSX_04274</i> | 939/291    | MW271818 | Mitochondrial fission process protein-like protein | KFH45208     | 79/90 |
|                | <i>BFSX_04273</i> | 927/309    | MW271817 | AN1-type zinc finger protein-like protein          | KFH45196     | 85/94 |
|                | <i>BFSX_04272</i> | 3115/1021  | MW271816 | DNA repair protein-like protein                    | KFH45197     | 76/84 |
|                | <i>BFSX_03676</i> | 3189/1006  | MW271830 | Armadillo-like helical protein                     | XP_018174607 | 68/77 |
|                | <i>BFSX_03674</i> | 2583/708   | MW271829 | High-affinity glucose transporter-like protein     | KFH42623     | 81/87 |
|                | <i>BFSX_03673</i> | 1689/473   | MW271828 | DUF89 domain-containing protein                    | KID97754     | 81/90 |
|                | <i>BFSX_03672</i> | 1593/488   | MW271827 | Pisatin demethylase-like protein (P450)            | KFH47378     | 73/87 |
|                | <i>BFSX_03670</i> | 1380/386   | MW271826 | Integral membrane protein                          | KZL68594     | 49/70 |
|                | <i>isrA</i>       | 22331/7398 | MT990941 | Nonribosomal peptide synthetase                    | KFX41393     | 38/56 |
| <i>isr</i>     | <i>isrB</i>       | 2194/574   | MT990942 | AMP dependent CoA ligase                           | XP_006666503 | 56/72 |
|                | <i>isrC</i>       | 1446/482   | MT990943 | Acyltransferase easC                               | C8VPT2       | 50/67 |
|                | <i>isrD</i>       | 8006/2544  | MT990944 | Polyketide synthase                                | KIA75545     | 60/74 |
|                | <i>BFSX_03665</i> | 1598/503   | MW271835 | Aminoglycoside phosphotransferase                  | PNY25379     | 56/72 |
|                | <i>BFSX_03664</i> | 1625/410   | MW271834 | Integral membrane protein                          | KAF4342798   | 55/67 |
|                | <i>BFSX_03663</i> | 9785/2981  | MW271833 | Polyketide synthase                                | PMD36174     | 75/85 |
|                | <i>BFSX_03662</i> | 1138/357   | MW271832 | Putative zinc-binding dehydrogenase                | PMD36173     | 80/92 |
|                | <i>BFSX_03661</i> | 1758/542   | MW271831 | Cytochrome P450                                    | PMD36172     | 78/88 |
| out of cluster | <i>SX-p5cr1</i>   | 926/287    | MT990945 | Pyrroline-5-carboxylate reductase                  | TVY57756     | 50/67 |
| out of cluster | <i>SX-p5cr2</i>   | 942/313    | MT990946 | Pyrroline-5-carboxylate reductase                  | KFH48959     | 81/89 |

**Table S10.** The substrate selectivity-conferring codes of A domains in DetxA, IsrA and IsdA

| NRPSs  | A domains      | Substrate selectivity-conferring codes |   |   |   |   |   |   |   |   |    | Predicted substrates based on analysis by NRPSsp <sup>[4]</sup> | Substrates based on natural products structures |
|--------|----------------|----------------------------------------|---|---|---|---|---|---|---|---|----|-----------------------------------------------------------------|-------------------------------------------------|
|        |                | 1                                      | 2 | 3 | 4 | 5 | 6 | 7 | 8 | 9 | 10 |                                                                 |                                                 |
| GrxA-A |                | D                                      | A | W | T | I | A | A | I | C | K  | Phe                                                             | L-Phe                                           |
| DetxA  | A <sub>1</sub> | D                                      | I | F | Y | A | I | T | T | A | K  | Phe                                                             | $\beta$ -Ala                                    |
|        | A <sub>2</sub> | G                                      | A | N | L | I | G | A | T | V | K  | Trp                                                             | L-HIC                                           |
|        | A <sub>3</sub> | D                                      | M | H | D | I | G | I | H | I | K  | Pro                                                             | $\beta$ -Me-L-Pro                               |
|        | A <sub>4</sub> | D                                      | G | L | F | I | G | I | P | V | K  | Pro                                                             | L-Ile                                           |
|        | A <sub>5</sub> | D                                      | A | W | F | Y | G | G | T | F | K  | Leu                                                             | L-Val                                           |
|        | A <sub>6</sub> | D                                      | V | W | I | Y | A | A | V | I | K  | Leu                                                             | L-Ala                                           |
| IsdA   | A <sub>1</sub> | D                                      | I | F | Y | A | I | T | T | A | K  | Pro                                                             | $\beta$ -Ala                                    |
|        | A <sub>2</sub> | G                                      | A | N | L | I | G | A | T | V | K  | Trp                                                             | L-HIC                                           |
|        | A <sub>3</sub> | D                                      | M | H | D | I | G | I | H | V | K  | Pro                                                             | L-Pro                                           |
|        | A <sub>4</sub> | D                                      | G | F | L | I | C | Y | P | A | K  | Pro                                                             | L-Phe                                           |
|        | A <sub>5</sub> | D                                      | A | W | F | V | G | G | S | F | K  | Leu                                                             | L-Val                                           |
|        | A <sub>6</sub> | D                                      | M | W | T | Y | G | A | A | I | K  | Leu                                                             | L-Phe                                           |
| IsrA   | A <sub>2</sub> | D                                      | I | Q | G | I | L | A | M | Q | K  | Pro                                                             | Gly                                             |
|        | A <sub>3</sub> | D                                      | A | S | Q | V | G | G | I | Y | K  | Phe                                                             | L-Val                                           |
|        | A <sub>4</sub> | D                                      | A | H | F | I | G | A | I | M | K  | Pro                                                             | L-Leu                                           |
|        | A <sub>5</sub> | D                                      | V | M | C | G | A | S | V | L | K  | Pro                                                             | L-Ala                                           |
|        | A <sub>6</sub> | D                                      | A | A | V | I | I | G | I | I | K  | Val                                                             | L-Val                                           |

**Table S11.** Primers used in this study

| Primers                                                                                                                                                                                                                                    | Sequence (5'-3')                                                           |
|--------------------------------------------------------------------------------------------------------------------------------------------------------------------------------------------------------------------------------------------|----------------------------------------------------------------------------|
| Plasmids construction (CRISPR/Cas9) for gene deletion of <i>detxA</i> , <i>detxE</i> , <i>isdA</i> , <i>isrA</i> , <i>p5cr1</i> and <i>p5cr2</i> (uppercase sequences indicate protospacer of sgRNA and its complementary ribozyme region) |                                                                            |
| detxA_sg-F                                                                                                                                                                                                                                 | accgGGTAGCcctgatgagtcctgaggacgaaacgagtaagctcgtcGCTACCCTGAAGTTAGCTCC        |
| detxA_sg-R                                                                                                                                                                                                                                 | aaacGGAGCTAACTTCAGGGTAGCgacgagcttactcgttcgtcctcacggactcatcaggGCTACC        |
| detxE_sg-F                                                                                                                                                                                                                                 | accgTGACACcctgatgagtcctgaggacgaaacgagtaagctcgtcGTGTCAACGGCGGTAAGGAG        |
| detxE_sg-R                                                                                                                                                                                                                                 | aaacCTCCTTACCGCCGTTGACACgacgagcttactcgttcgtcctcacggactcatcaggGTGTCA        |
| isdA_sg-F                                                                                                                                                                                                                                  | accgGATGCCcctgatgagtcctgaggacgaaacgagtaagctcgtcGGCATCTTGAATTGTCGTCG        |
| isdA_sg-R                                                                                                                                                                                                                                  | aaacCGACGACAATTCAAGATGCCgacgagcttactcgttcgtcctcacggactcatcaggggcaccGGCATC  |
| isrA_sg-F                                                                                                                                                                                                                                  | accgTATACCcctgatgagtcctgaggacgaaacgagtaagctcgtcGGTATACCGTATACC CAACG       |
| isrA_sg-R                                                                                                                                                                                                                                  | aaacCGTTGGGTATACGGTATACCgacgagcttactcgttcgtcctcacggactcatcaggggcaccGGTATA  |
| p5cr1_sg-F                                                                                                                                                                                                                                 | accgTGGAGAcctgatgagtcctgaggacgaaacgagtaagctcgtcTCTCCAGGTTCTGGCTCGCC        |
| p5cr1_sg-R                                                                                                                                                                                                                                 | aaacGGCGAGCCAGAACCCTGGAGAgacgagcttactcgttcgtcctcacggactcatcaggggcaccTCTCCA |
| p5cr2_sg-F                                                                                                                                                                                                                                 | accgGGCTGCcctgatgagtcctgaggacgaaacgagtaagctcgtcGCAGCCGAGCAGGATGATGT        |
| p5cr2_sg-R                                                                                                                                                                                                                                 | aaacACATCATCCTGCTCGGCTGCgacgagcttactcgttcgtcctcacggactcatcaggggcaccGCAGCC  |
| dDNAs construction for gene deletion of <i>detxA</i> , <i>detxE</i> , <i>isdA</i> , <i>isrA</i> , <i>p5cr1</i> and <i>p5cr2</i> (lowercase sequences indicate overlap region)                                                              |                                                                            |
| detxA_5f-F                                                                                                                                                                                                                                 | CCGGACTCGCTGCCTGATTAA                                                      |
| detxA_5f-R                                                                                                                                                                                                                                 | AGAAGTCGGCTGCCGTTTCT                                                       |
| detxA_3f-F                                                                                                                                                                                                                                 | agaacggcagccgacttctCAGAGCGTCGCTGACTACCTGAAT                                |
| detxA_3f-R                                                                                                                                                                                                                                 | CTGAGCTCCGGTGGTGAATGA                                                      |
| detxA-NF                                                                                                                                                                                                                                   | GGATGATGTGAACCGGTGGTGG                                                     |
| detxA-NR                                                                                                                                                                                                                                   | CTGCTGCGTATCTCGGTGATGAA                                                    |
| detxE_5f-F                                                                                                                                                                                                                                 | ATCACAGTAGGGTACAGCGCAG                                                     |
| detxE_5f-R                                                                                                                                                                                                                                 | CATGGCGCTTACACGGTGG                                                        |
| detxE_3f-F                                                                                                                                                                                                                                 | caccgtgaagcgcaccatgTGATGCCGGCAATTCCCTTTC                                   |
| detxE_3f-R                                                                                                                                                                                                                                 | AGAGCACCGCCATCATGCTT                                                       |
| detxE-NF                                                                                                                                                                                                                                   | GTATGTATCCAGTGCACCCAGG                                                     |

## SUPPORTING INFORMATION

---

|               |                                              |
|---------------|----------------------------------------------|
| detxE-NR      | CCACGACTACCGGTCTCACAT                        |
| isdA_5f-F     | GTAGCTCGCCTCCTGGATCCAA                       |
| isdA_5f-R     | ccaactttctggctcggagaCCTCTTAGATATCGGCTGCCG    |
| isdA_3f-F     | TCTCCGAGCCAGAAAGTTGGG                        |
| isdA_3f-R     | CGTCATCTGTGACGACGACAT                        |
| isdA-NF       | GTAAACATCTACGGACCCGCC                        |
| isdA-NR       | GCTCGCCTCCACTTGTGAAT                         |
| isrA_5f-F     | CTGGAGACTCTTGTCTTGGTG                        |
| isrA_5f-R     | tcgcccacgctttgagTCTCTGTGCGCCGTGACTGGTTTGA    |
| isrA_3f-F     | GAGACTCAAAGCGTGGGCGAA                        |
| isrA_3f-R     | TAGATGACAAGCGCAGCGTTG                        |
| isrA-NF       | AACGGATACGGGCCCTCAGA                         |
| isrA-NR       | TGAGGAACCTTACCCTCAAAGG                       |
| isrA_check-F  | ACTCTATCACGGTGGTTGCAT                        |
| isrA_check-R  | GTTTGCCTTCAGTCTTCGGAT                        |
| p5cr1_5f-F    | CTCATCATGATCGAGGCGACG                        |
| p5cr1_5f-R    | GAGCAAGTTTACATAGGGAGTCACCC                   |
| p5cr1_3f-F    | tgactccctatgtaaacttgctcGCGACTGTCAAGTTCTCGGAC |
| p5cr1_3f-R    | CATTCTGCTGAACATGTCCCAG                       |
| p5cr1-NF      | CTACGAGAACGTTGGCGTCATC                       |
| p5cr1-NR      | GTCACAGTGGGAGCTGTTGC                         |
| p5cr1_check-F | GGTCATTTACATTGGTGCTGGTGTC                    |
| p5cr1_check-R | ACATTGATGCCTACGAGCAAGTGTG                    |
| p5cr2_5f-F    | GTTGAGGTGTTGGAGCTGGGA                        |
| p5cr2_5f-R    | aggcagctttggcgtctcTAGGAGCTGACATGCTGGCTACT    |
| p5cr2_3f-F    | TAGAGACGCCAAAGCTGCCTAAG                      |
| p5cr2_3f-R    | GGAATTCCTGCGGAAGATGGC                        |
| p5cr2-NF      | AACCTCATGCGGACCTCGAAC                        |
| p5cr2-NR      | CACCTCGACACCAGTGTCACT                        |
| p5cr2_check-F | CATATAATCTGTGACGCCGAAACACC                   |
| p5cr2_check-R | CTCAACATCTCGCAACCGATATCGTA                   |

---

Plasmids construction for protein purification (lowercase sequences indicate overlap region)

|             |                                                    |
|-------------|----------------------------------------------------|
| LIC_DetxE-F | tacttccaatccaatgcaATGGGTTCCACAAGCCCCAATG           |
| LIC_DetxE-R | ttatccaactccaatgTCAGTACGCAGTGGCAACACG              |
| LIC_P5CR1-F | tacttccaatccaatgcaATGTCCGAGA ACTTGACAGTCGC         |
| LIC_P5CR1-R | ttatccaactccaatgCTATGTAACTTGCTCATGTTTCTCATTCTATCCG |
| LIC_P5CR2-F | tacttccaatccaatgcaATGGGTATTGCCATCGTCGGT            |
| LIC_P5CR2-R | ttatccaactccaatgCTAGTTTGGCGGCTGGTTGGT              |

---

**Table S12.** Plasmids and strains used in this study

| Name                          | Description                                                                                               | References                        |
|-------------------------------|-----------------------------------------------------------------------------------------------------------|-----------------------------------|
| <b>Plasmids</b>               |                                                                                                           |                                   |
| pYBC-01a                      | Initial CRISPR/Cas9 plasmid (hygromycin resistance) without any sgRNA sequence for in-frame gene deletion | [1]                               |
| pMM1029                       | Modified pYBC-01a with sgRNA sequence for <i>detxA</i> deletion                                           | This study                        |
| pMM1030                       | Modified pYBC-01a with sgRNA sequence for <i>isdA</i> deletion                                            | This study                        |
| pMM1031                       | Modified pYBC-01a with sgRNA sequence for <i>isrA</i> deletion                                            | This study                        |
| pMM1032                       | Modified pYBC-01a with sgRNA sequence for <i>detxE</i> deletion                                           | This study                        |
| pMM1033                       | Modified pYBC-01a with sgRNA sequence for <i>p5cr1</i> deletion                                           | This study                        |
| pMM1034                       | Modified pYBC-01a with sgRNA sequence for <i>p5cr2</i> deletion                                           | This study                        |
| pMCSG7                        | Plasmid with His <sub>6</sub> tag for protein purification                                                | [2]                               |
| pMCSG19                       | Plasmid with MBP tag for protein purification                                                             | [3]                               |
| pMM1035                       | Modified pMCSG7 with <i>detxE</i> for purification of DetxE                                               | This study                        |
| pMM1036                       | Modified pMCSG19 with <i>p5cr1</i> for purification of P5CR1                                              | This study                        |
| pMM1037                       | Modified pMCSG19 with <i>p5cr2</i> for purification of P5CR2                                              | This study                        |
| <b><i>E. coli</i> strains</b> |                                                                                                           |                                   |
| <i>E. coli</i> DH5 $\alpha$   | For plasmid construction                                                                                  | Beijing TransGen Biotech Co., Ltd |
| <i>E. coli</i> BL21(DE3)      | For protein overproduction                                                                                | Beijing TransGen Biotech Co., Ltd |
| <b>Fungi strains</b>          |                                                                                                           |                                   |
| <i>B. felina</i> SX-6-22      | Wild-type strain for destruxins, isaridins and isariins production                                        | This study                        |
| MM10024                       | <i>B. felina</i> SX-6-22 with <i>detxA</i> deletion                                                       | This study                        |
| MM10025                       | <i>B. felina</i> SX-6-22 with <i>isdA</i> deletion                                                        | This study                        |
| MM10026                       | <i>B. felina</i> SX-6-22 with <i>isrA</i> deletion                                                        | This study                        |
| MM10027                       | <i>B. felina</i> SX-6-22 with <i>detxE</i> deletion                                                       | This study                        |
| MM10028                       | <i>B. felina</i> SX-6-22 with <i>p5cr1</i> deletion                                                       | This study                        |
| MM10029                       | <i>B. felina</i> SX-6-22 with <i>p5cr2</i> deletion                                                       | This study                        |

**Figure S1.** Representative natural products that contain (3*S*/3*R*)-methyl-L-proline moieties. Neofrapeptin F,<sup>[1]</sup> scytalidamide B,<sup>[2]</sup> paraherquamide E<sup>[3]</sup> and penicilerquamide C<sup>[4]</sup> contain (3*S*)-methyl-L-proline moieties. The (3*S*)-methyl-L-proline is used as a building block in the biosynthesis of UCS1025A.<sup>[5]</sup> Pentaminolarin<sup>[6]</sup> and bottromycin A<sub>2</sub><sup>[7]</sup> contain (3*R*)-methyl-L-proline moieties. The 3-methyl-L-proline moieties are labelled in red.

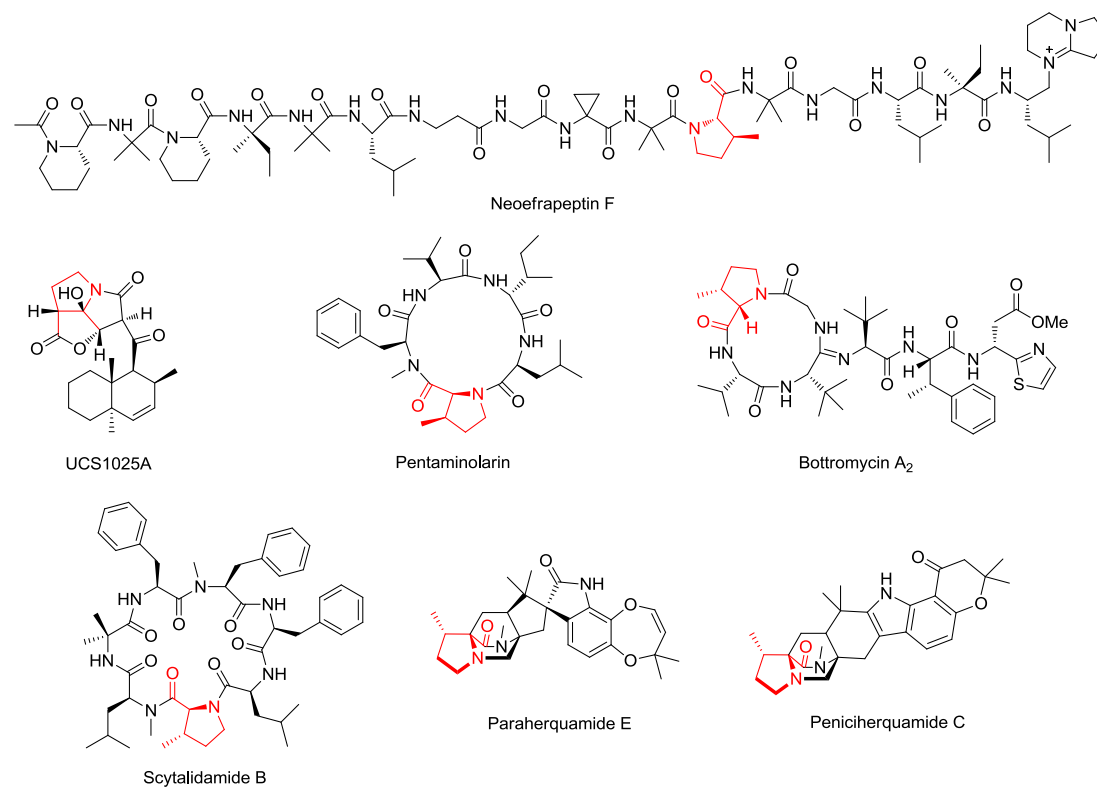

**Figure S2.** Morphological feature and phylogenetic analysis of *Beauveria felina* SX-6-22. (a) *B. felina* SX-6-22 isolated from marine sponge *Xestospongia testudinaria*. (b) The phylogenetic analysis of *B. felina* SX-6-22 based on ITS sequences (accession numbers were shown in parentheses).

a

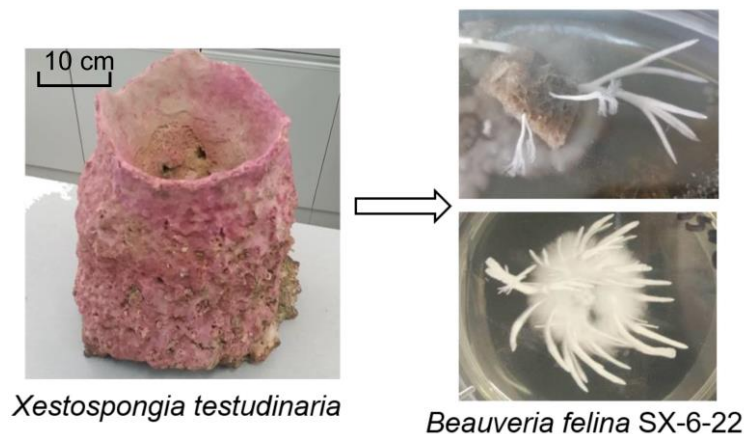

b

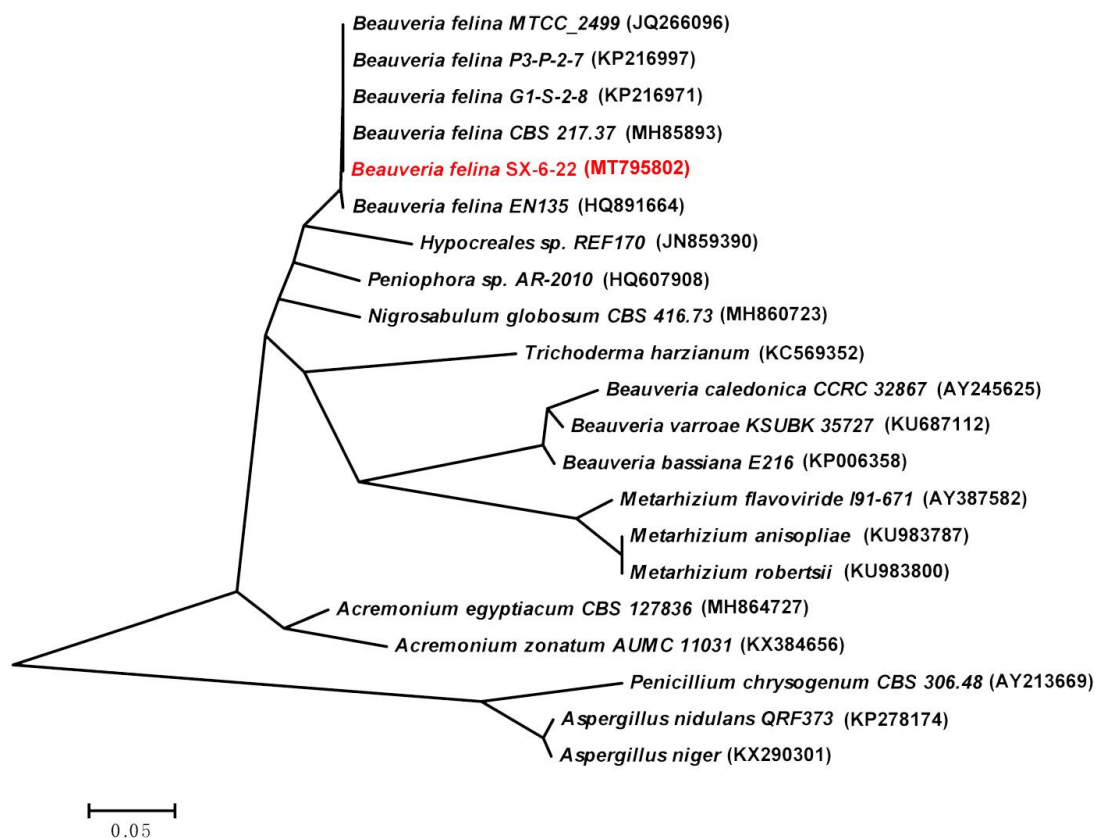

**Figure S3.** HPLC chromatograph and  $^1\text{H}$  NMR spectrum for EtOAc extract of *B. felina* SX-6-22. (a) HPLC profile of EtOAc extract of *B. felina* SX-6-22. (b)  $^1\text{H}$  NMR spectrum of the crude extract and characteristic signals related to peptides.

a. UPLC (210 nm)

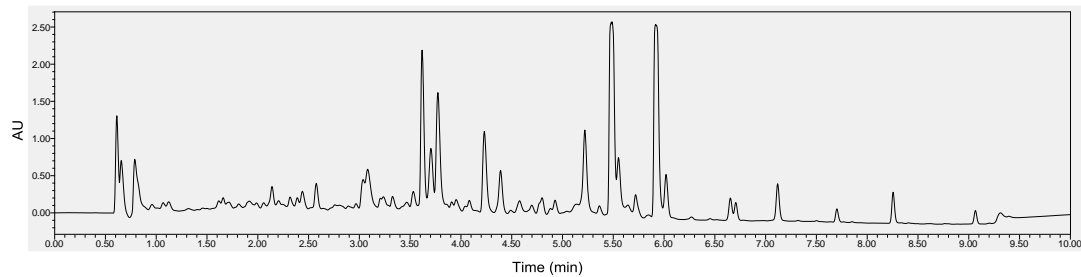

b.  $^1\text{H}$  NMR (400 MHz,  $\text{DMSO}-d_6$ )

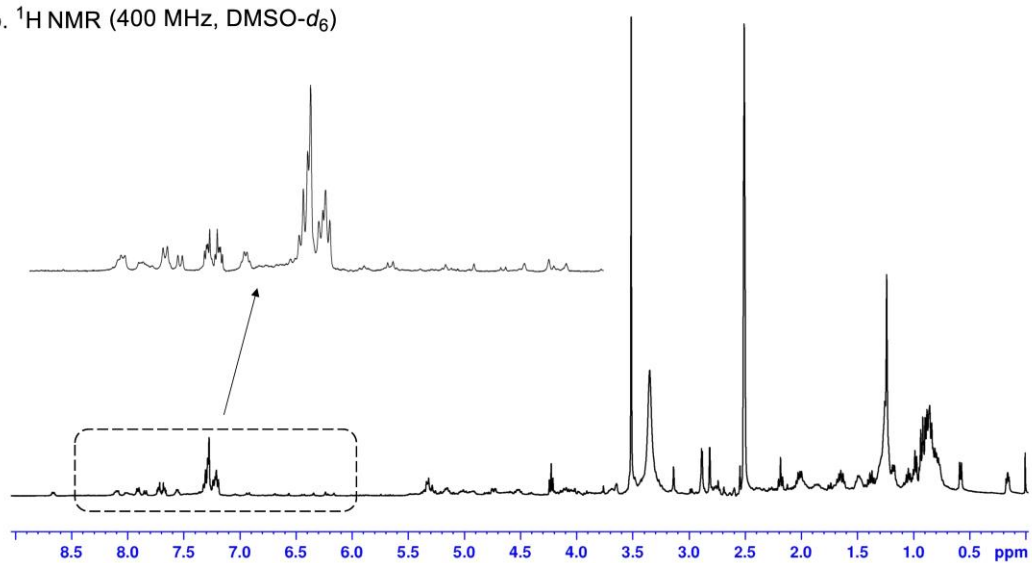



**Figure S4.** Global Natural Product Social Molecular Networking (GNPS) based on LC-MS data. The clusters marked in green, red and blue were related to destruxins' group, isaridins' group and isariins' group, respectively. The isolated compounds (**1-26**) were labeled with solid triangles ( $\blacktriangle$ ) while the compounds (**27-30**) predicted by MS<sup>2</sup> analysis were labeled with hollow triangles ( $\triangle$ ).

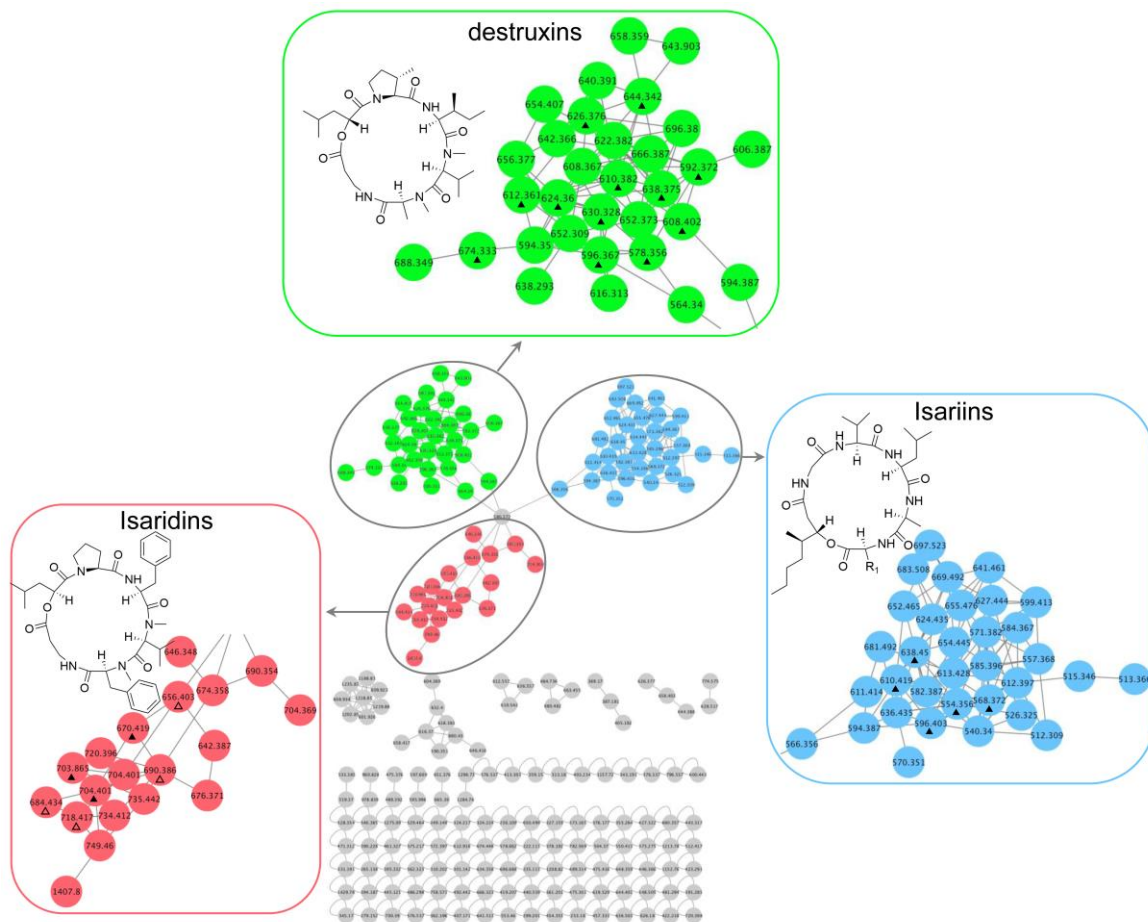

**Figure S5.** MS/MS spectra of known compounds (**12**, **20**, **23**, **27-30**) detected from total ion chromatogram (TIC).

a. MS/MS spectrum of destruxin A (**12**)

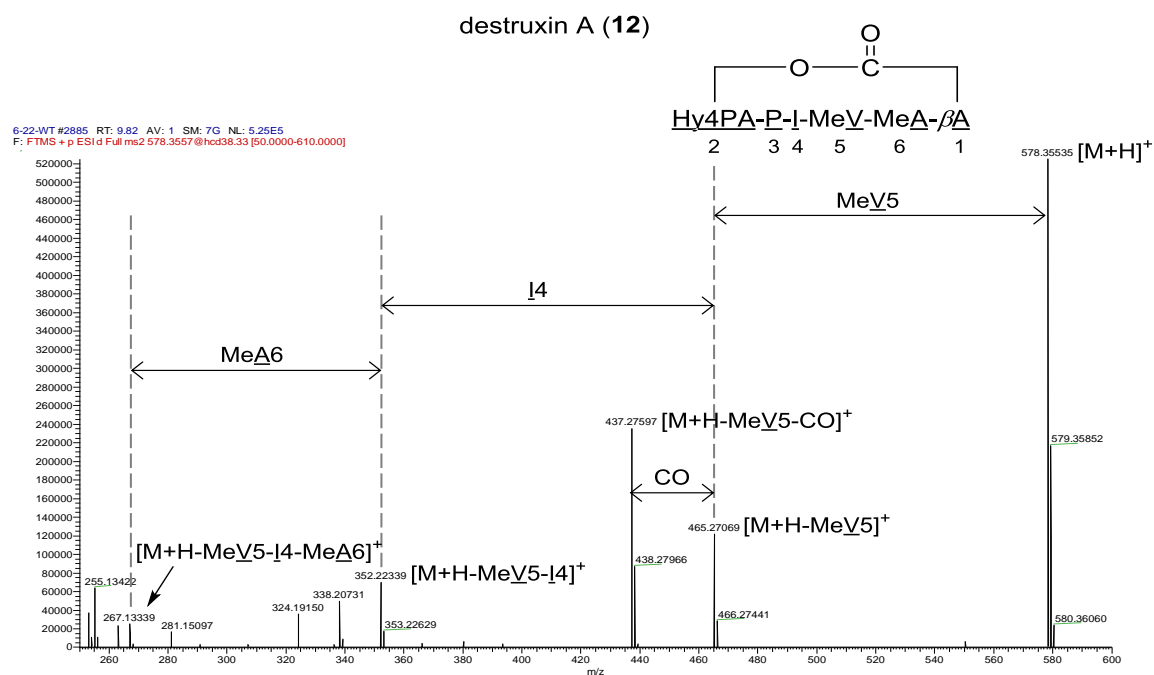

b. MS/MS spectrum of isaridin A (**20**)

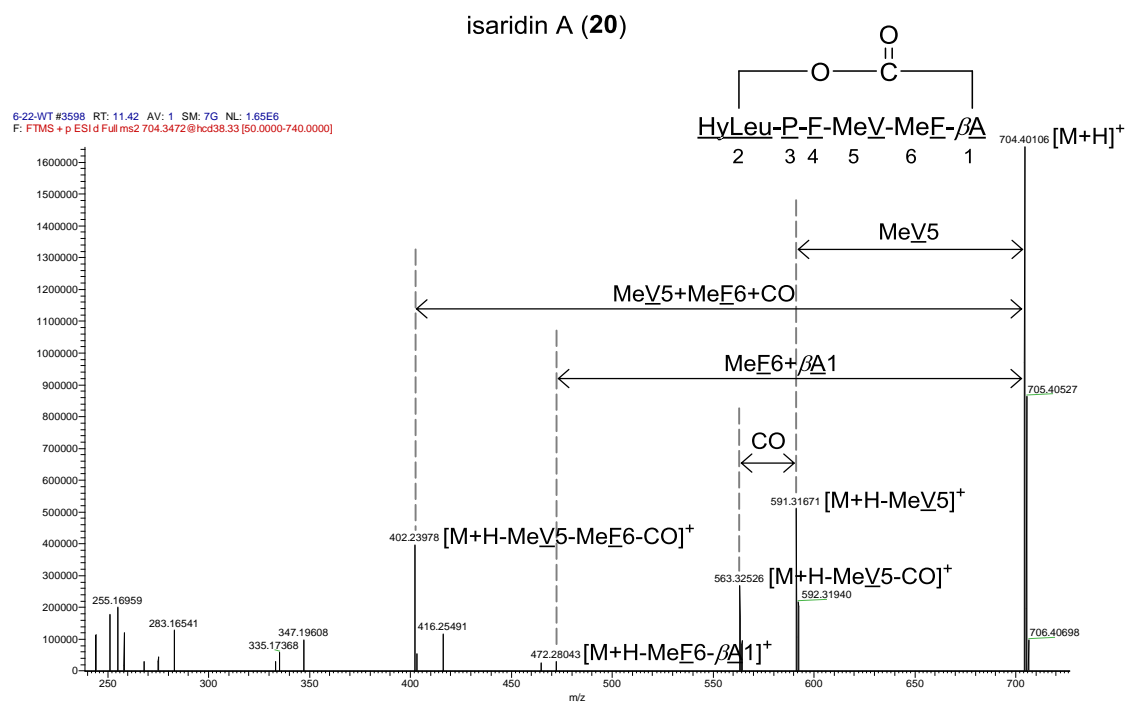

c. MS/MS spectrum of isoisariin B (23)

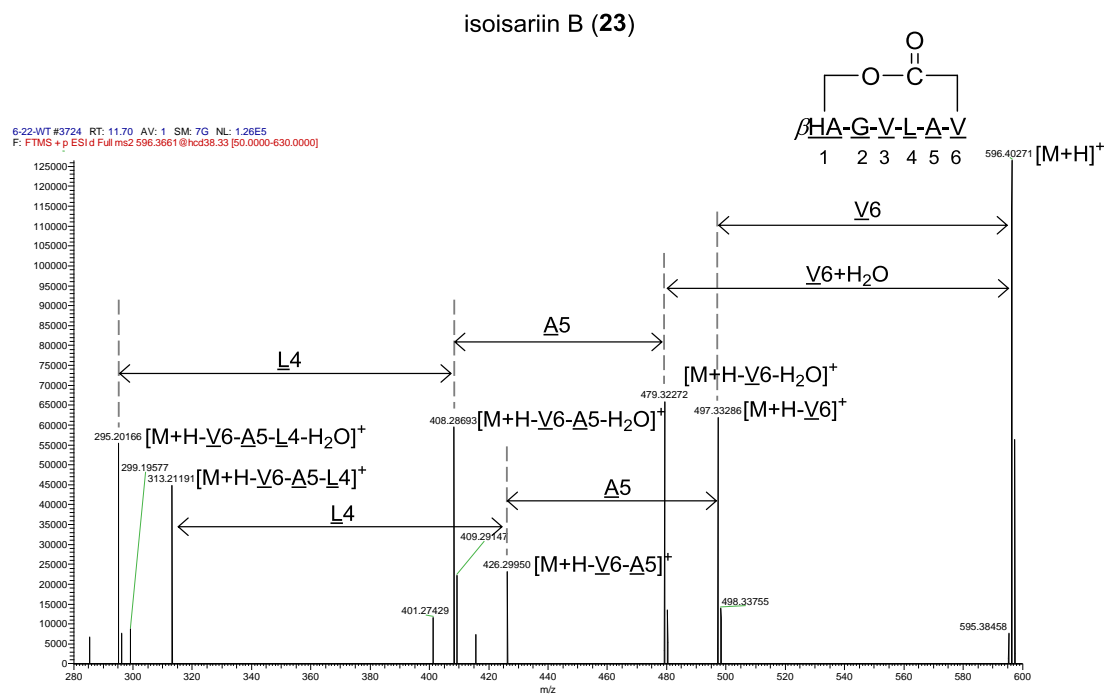

d. MS/MS spectrum of isaridin D (27)

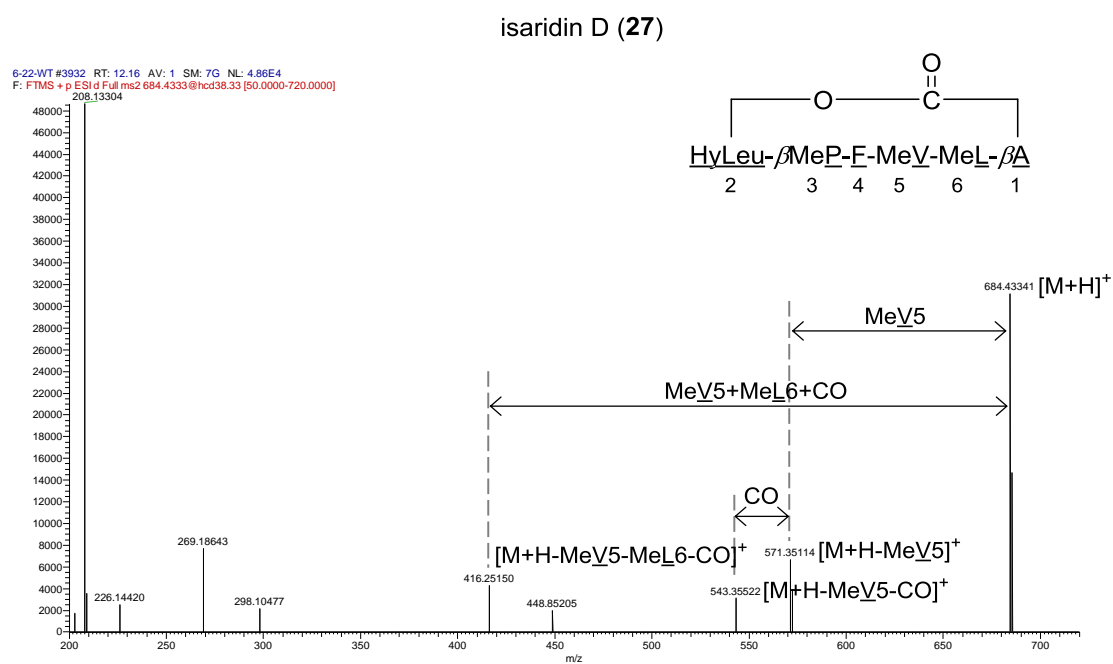

e. MS/MS spectrum of isaridin B (28)

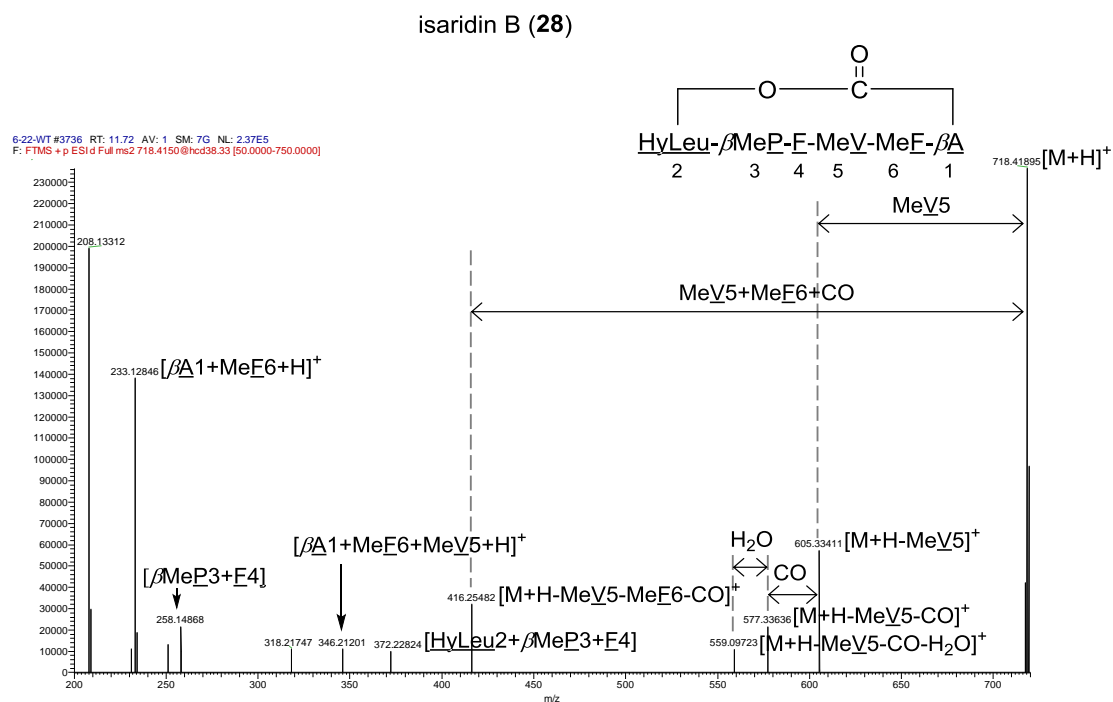

f. MS/MS spectrum of desmethylisaridin C (29)

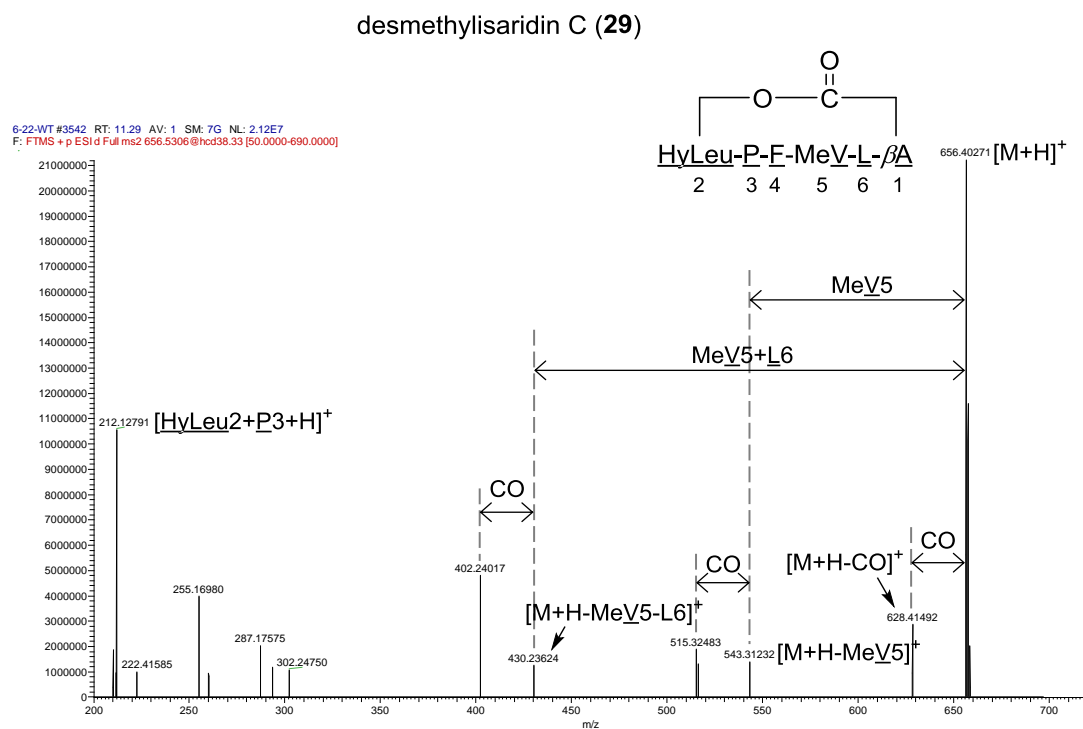

## g. MS/MS spectrum of desmethylisaridin A (30)

## desmethylisaridin A (30)

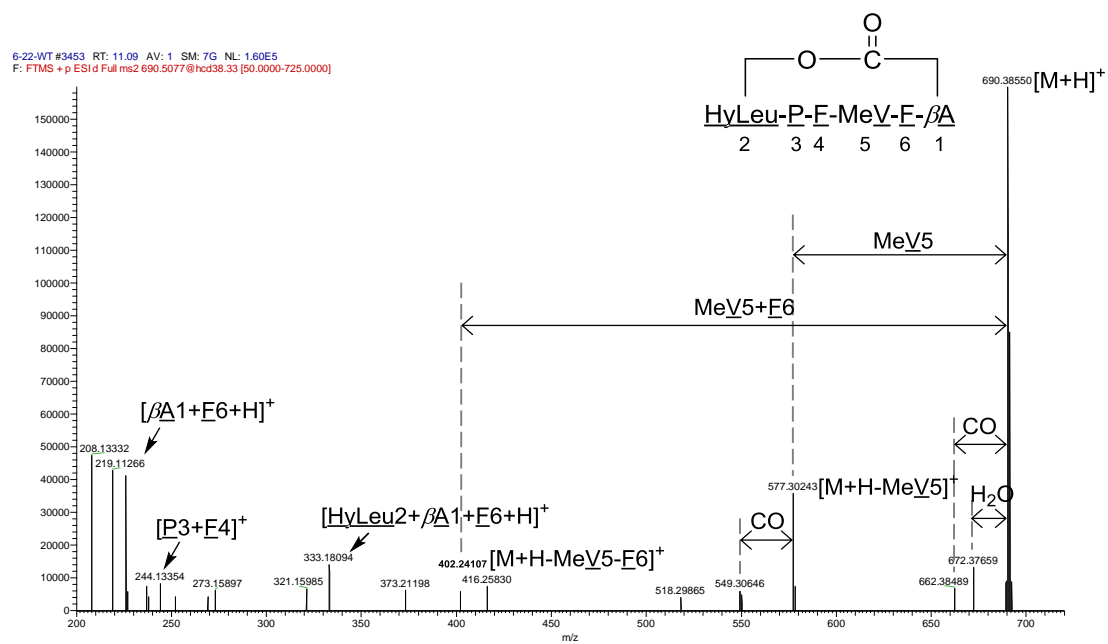

**Figure S6.** The Marfey's analysis for the determination of absolute configuration of **6**, based on the comparison of the HPLC retention times of the FDAA derivatives of **6**'s hydrolysates with FDAA derivatives of standard amino acids.

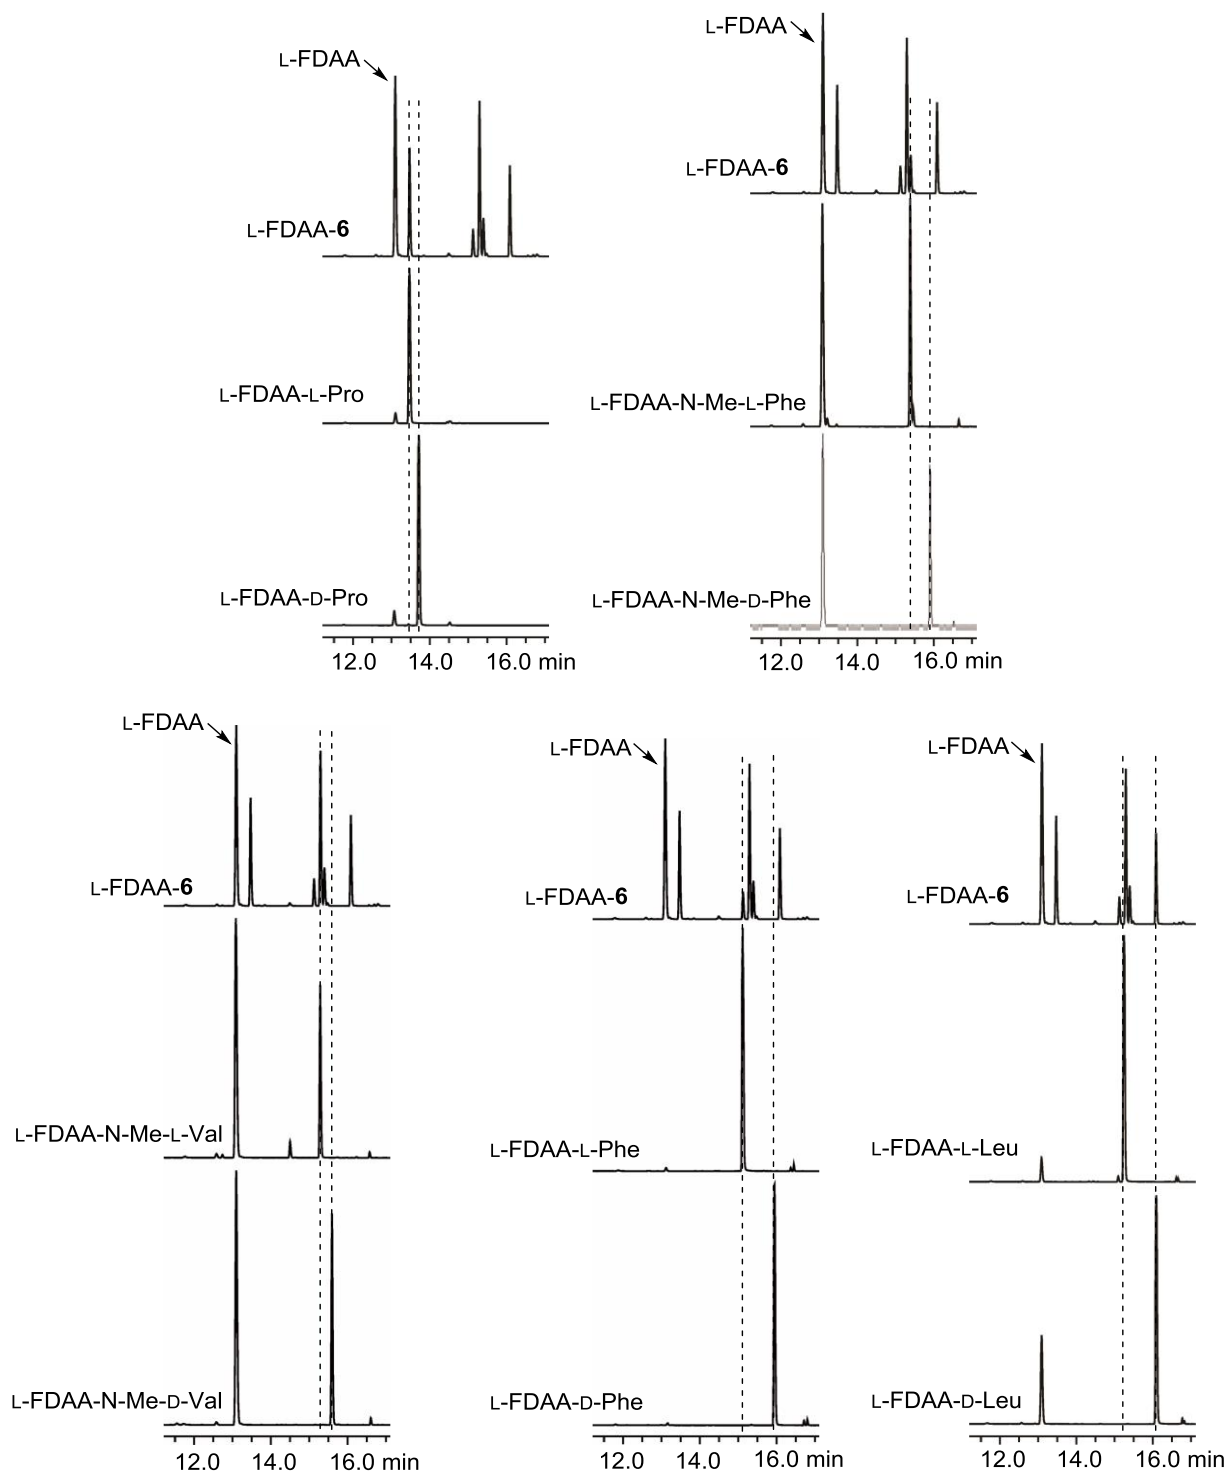

**Figure S7.** Schematic diagrams of gene deletion of *detxA*, *isdA*, *isrA*, *detxE*, *SX-p5cr1* and *SX-p5cr2* and PCR confirmation for mutants. (a) Schematic diagrams of gene deletion process by CRISPR/Cas9 system. (b) PCR confirmation for each of the mutants. Some gels were spliced to remove unrelated lanes among the molecular weight markers (labeled with "M"), lanes for wild-type (WT), and lanes for mutants.

a

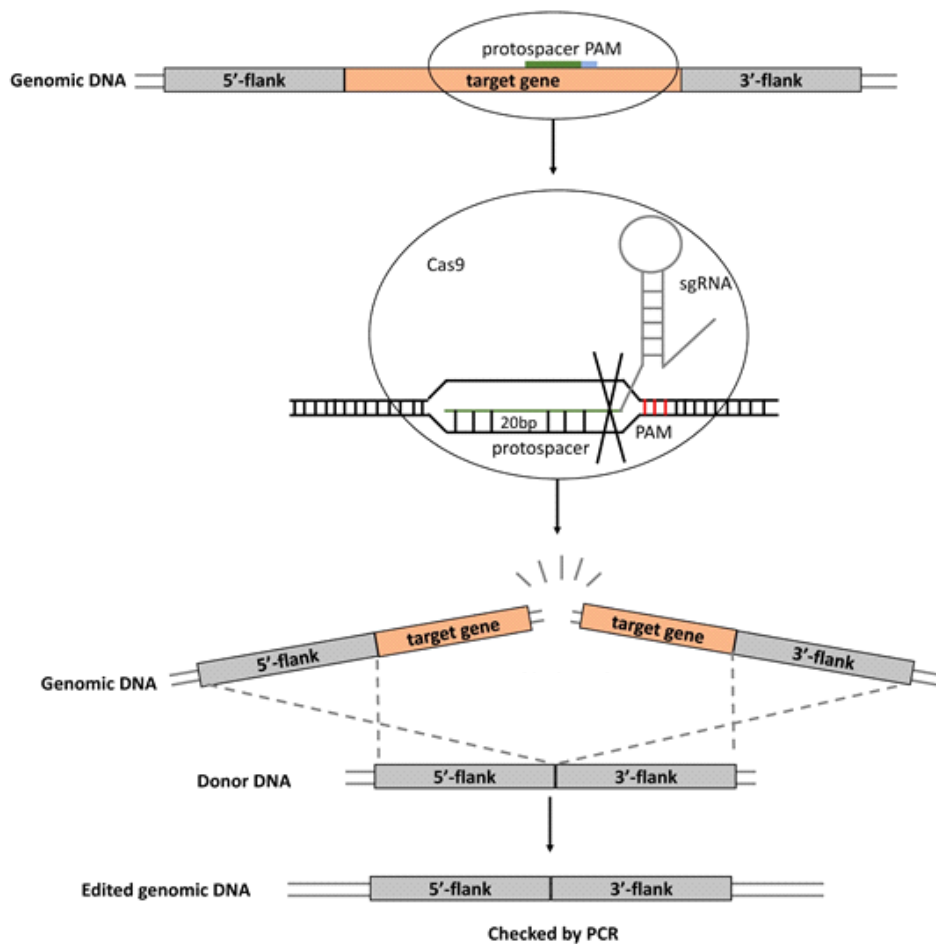

b

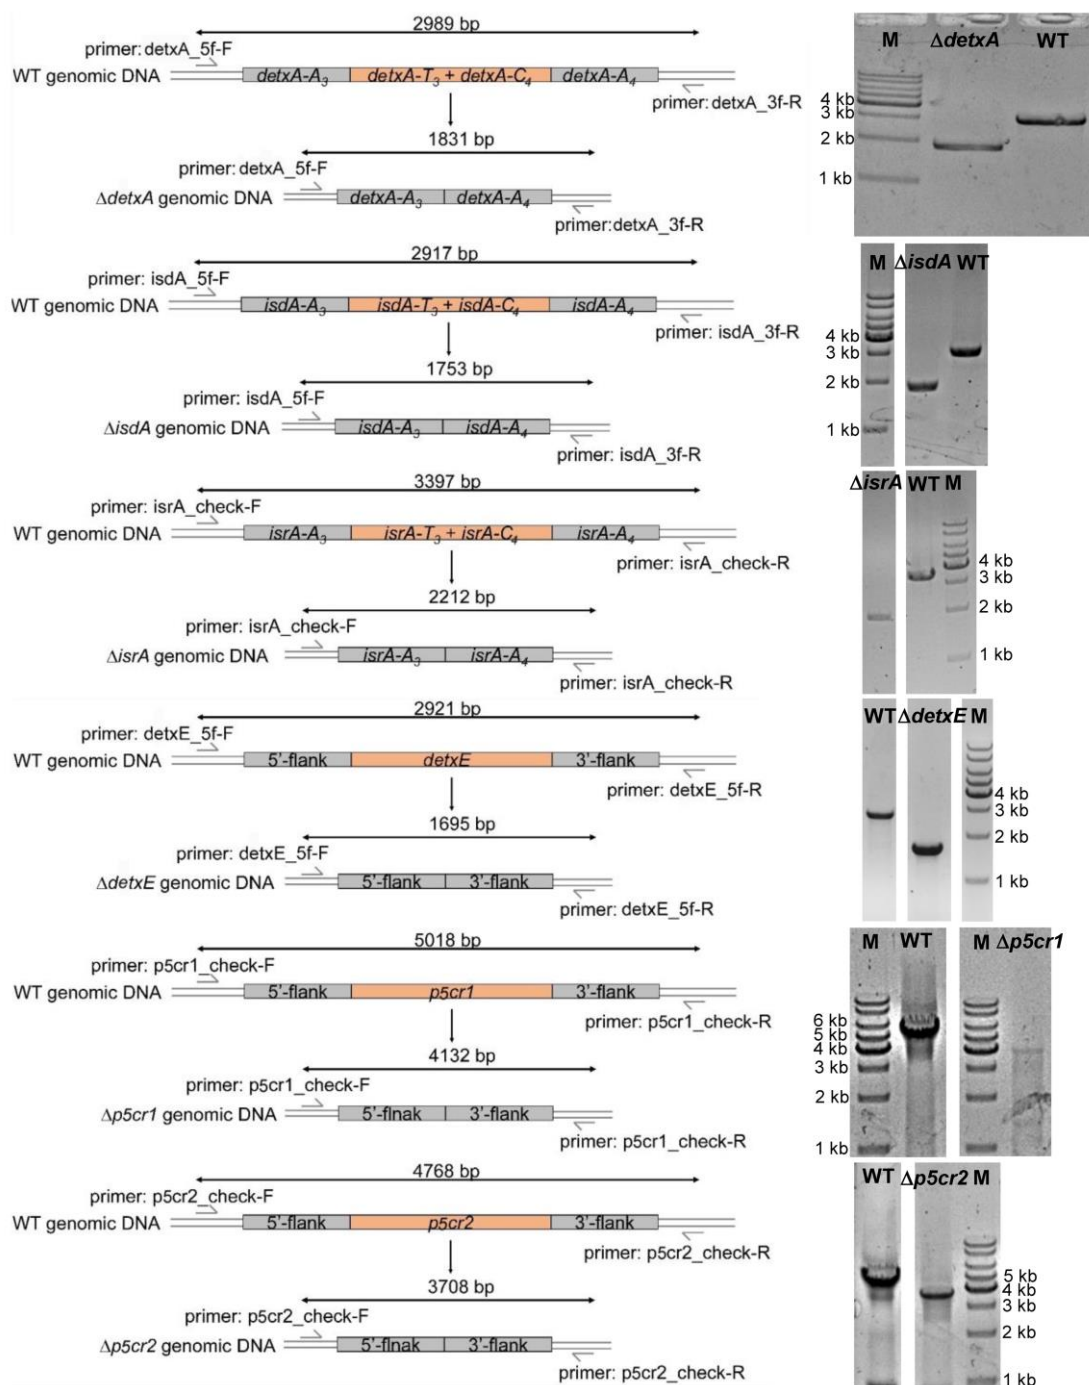



**Figure S8.** LC-MS analysis of compounds accumulated in wild-type strain and mutants including  $\Delta detxA$ ,  $\Delta isdA$  and  $\Delta isrA$ . Compounds **1/2**, **3/4**, **5/8**, **21/22** and **7/25** are isomers.

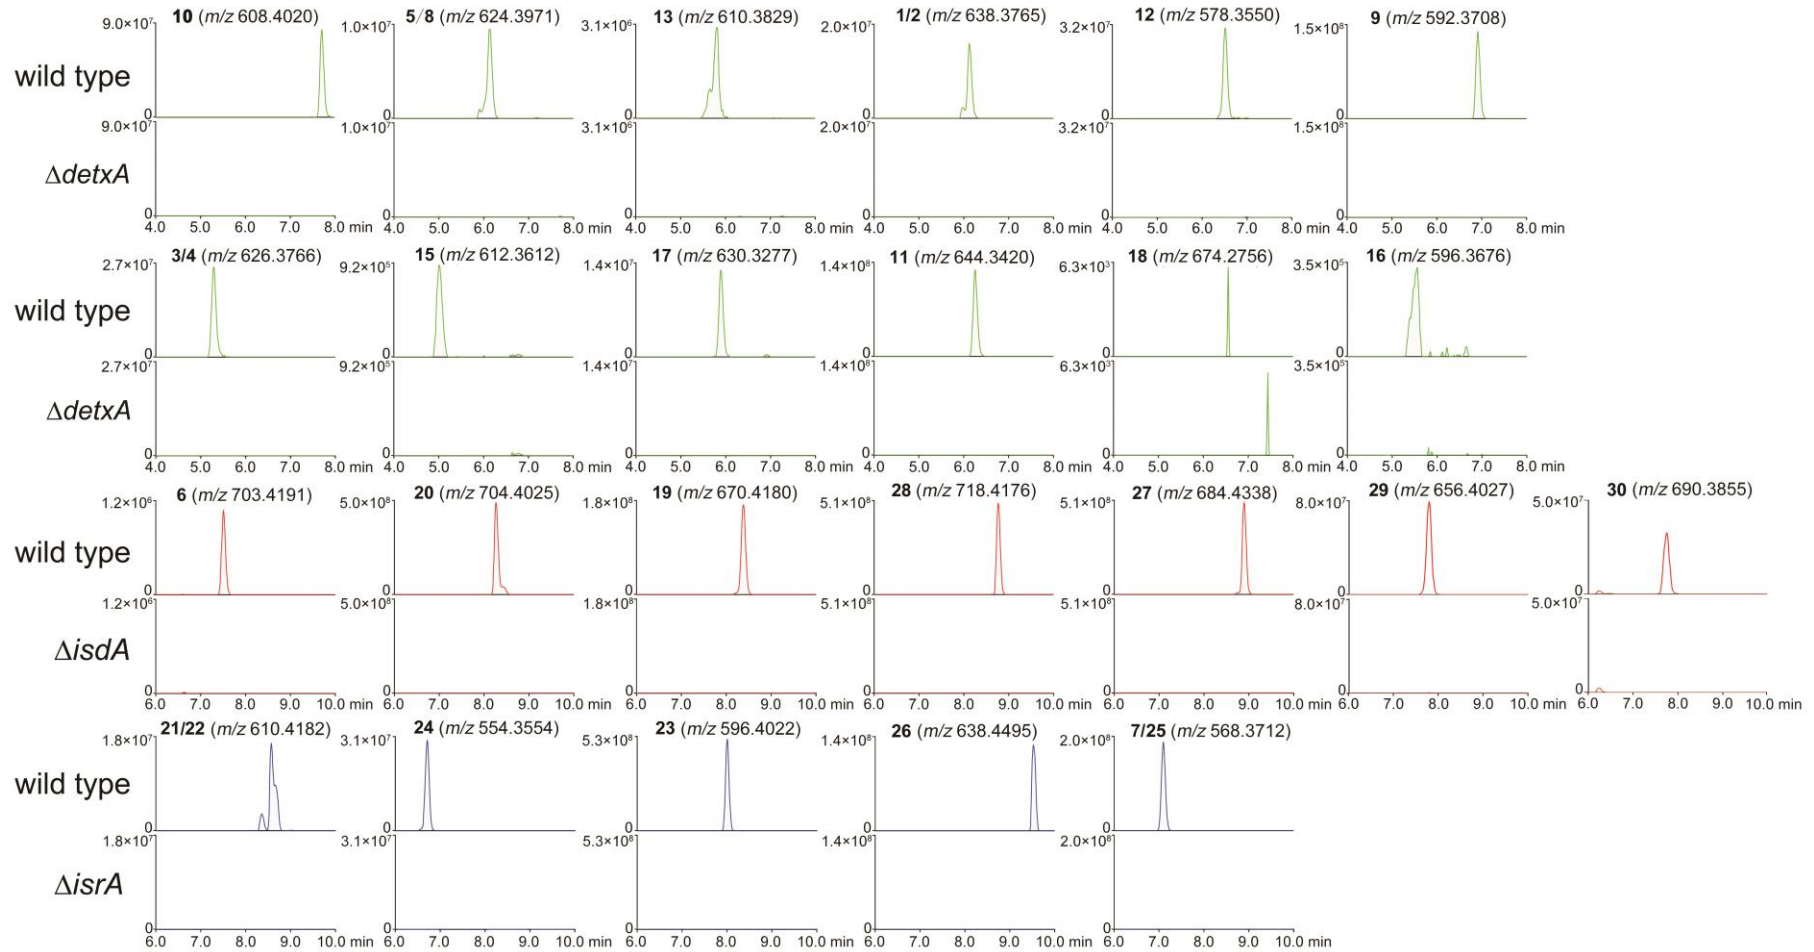

**Figure S9.** Proposed biogenetic oxidation of  $\alpha$ -HIC.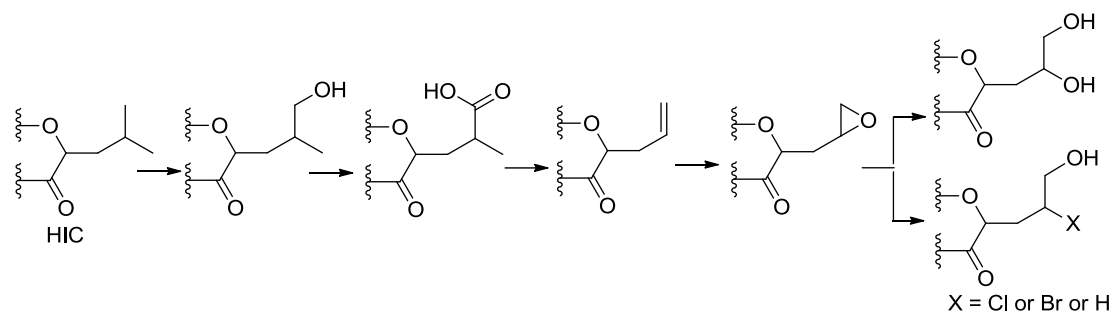

**Figure S10.** The extracted ion chromatogram (EIC) detection of compounds accumulated in  $\Delta detxE$  mutant compared to wild-type strain.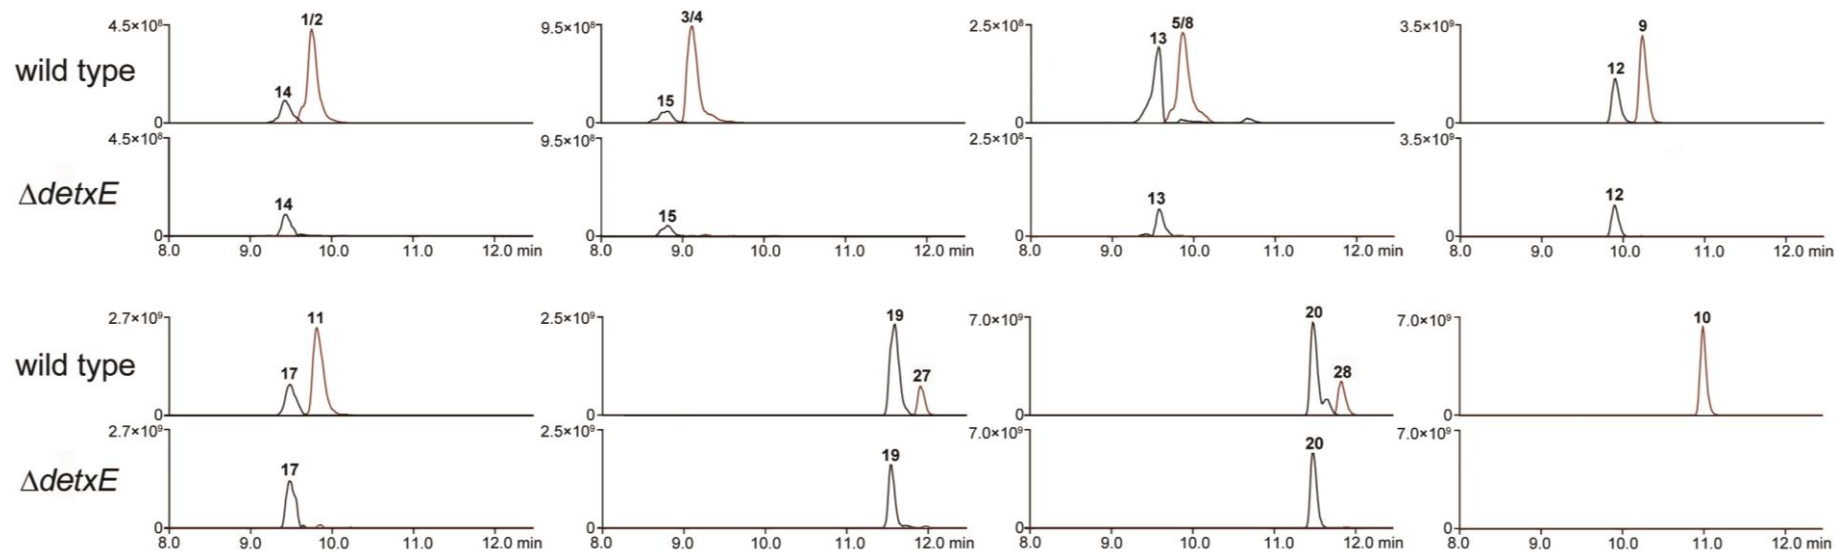

**Figure S11.** SDS-PAGE analysis of purified DetxE, SX-P5CR1 and SX-P5CR2.

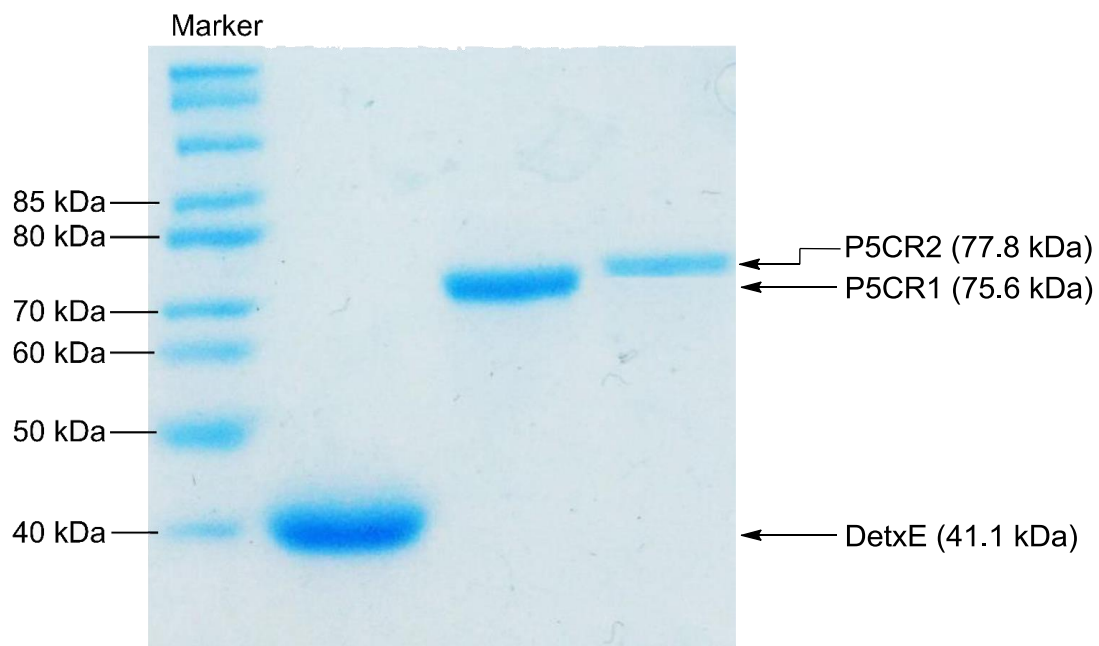

**Figure S12.** The UPLC profile of DetxE reaction with *o*-AB derivatization using L-isoleucine as the substrate.

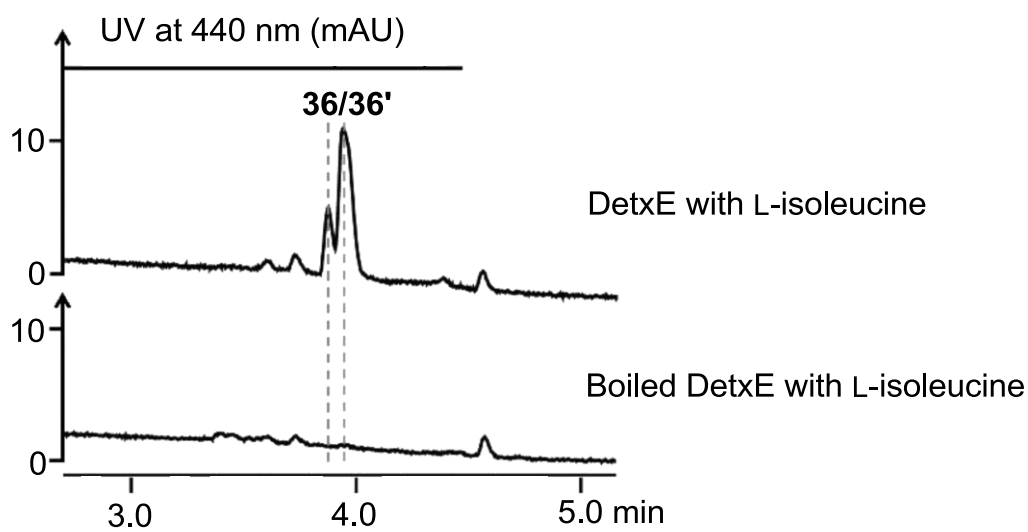

**Figure S13.** The HPLC profiles of DetxE reaction with Fmoc-Cl derivatization. Lane I, the reaction of DetxE with L-isoleucine as the substrate; lane II, the reaction of boiled DetxE with L-isoleucine as the substrate; lane III, the reaction of DetxE with D-isoleucine as the substrate; lane IV, the reaction of DetxE with L-*allo*-isoleucine as the substrate.

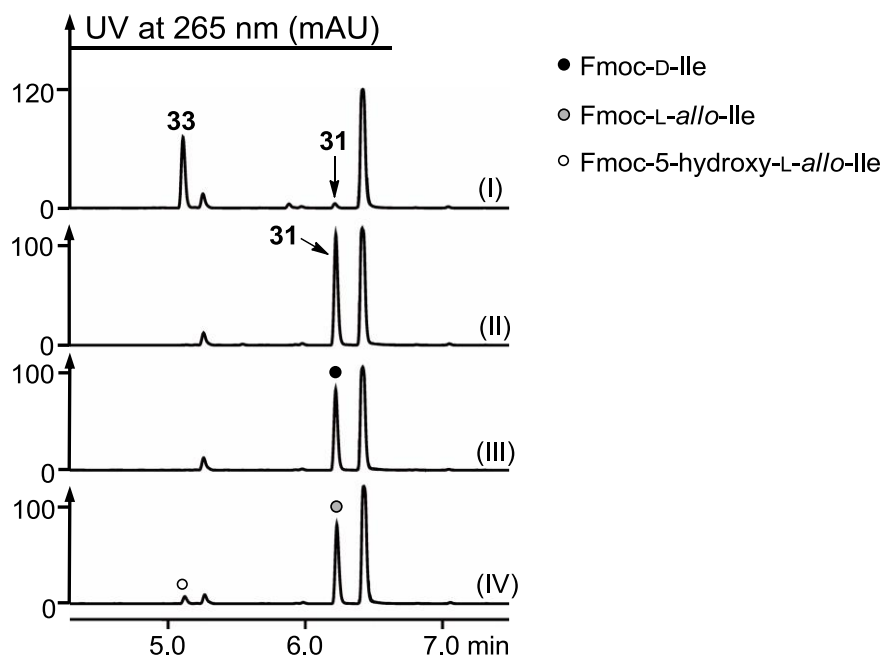

**Figure S14.** The EIC analysis of DetxE reactions without Fmoc-Cl derivatization. Lane I, the reaction of DetxE with L-isoleucine as the substrate; lane II, the reaction of boiled DetxE with L-isoleucine as the substrate; lane III, the reaction of DetxE with D-isoleucine as the substrate; lane IV, the reaction of DetxE with L-*allo*-isoleucine as the substrate. The  $m/z$  148 ions were selected for the detection of 5-hydroxyisoleucine and  $m/z$  132 ions were selected for the detection of L-isoleucine, D-isoleucine and L-*allo*-isoleucine.

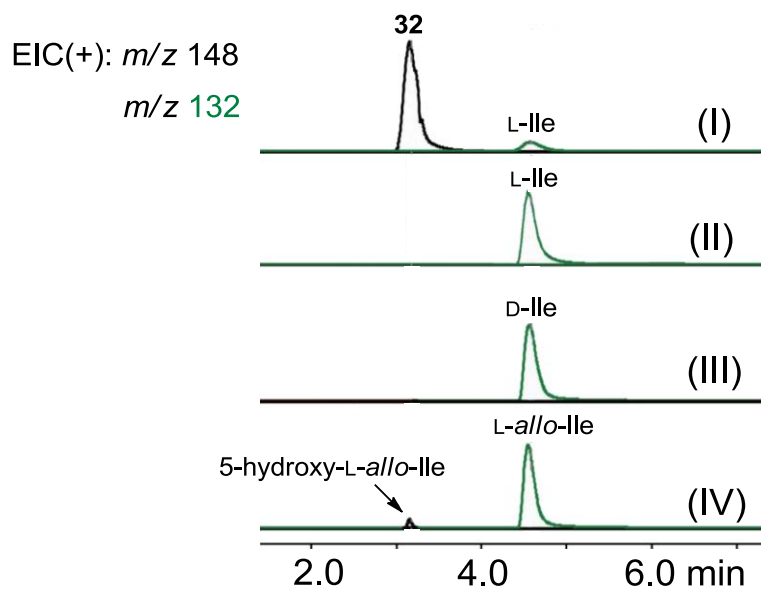

**Figure S15.** The biosynthetic process of (4*R*)-methyl-L-proline reported in previous literature.<sup>[8]</sup>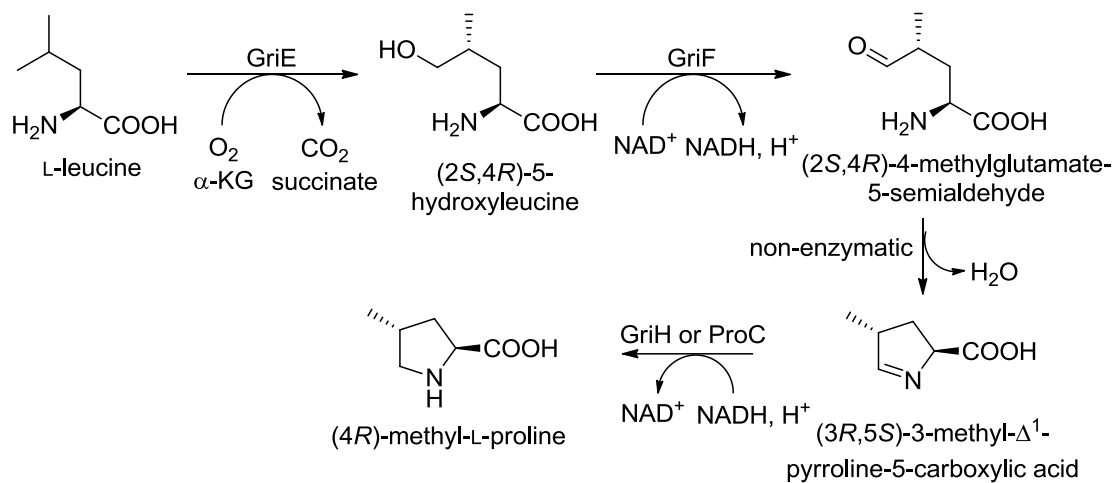



**Figure S16.** The EIC analysis of DetxE combined with P5CR1/P5CR2 reactions, using L-isoleucine as the substrate and derivatized with Fmoc-Cl. Lane I, standard L-isoleucine; lane II, standard (3*S*)-methyl-L-proline; lane III, the reaction of DetxE; lane IV, the reaction of DetxE with SX-P5CR1 and NADH; lane V, the reaction of DetxE with SX-P5CR1 and NADPH; lane VI, the reaction of DetxE with SX-P5CR2 and NADH; lane VII, the reaction of DetxE with SX-P5CR2 and NADPH; lane VIII, the reaction of boiled DetxE with both SX-P5CR1 and SX-P5CR2 added. The peaks (*m/z* 352) labelled with asterisk represent the in-situ dehydration product of **33** generated in the ESIMS experiments.

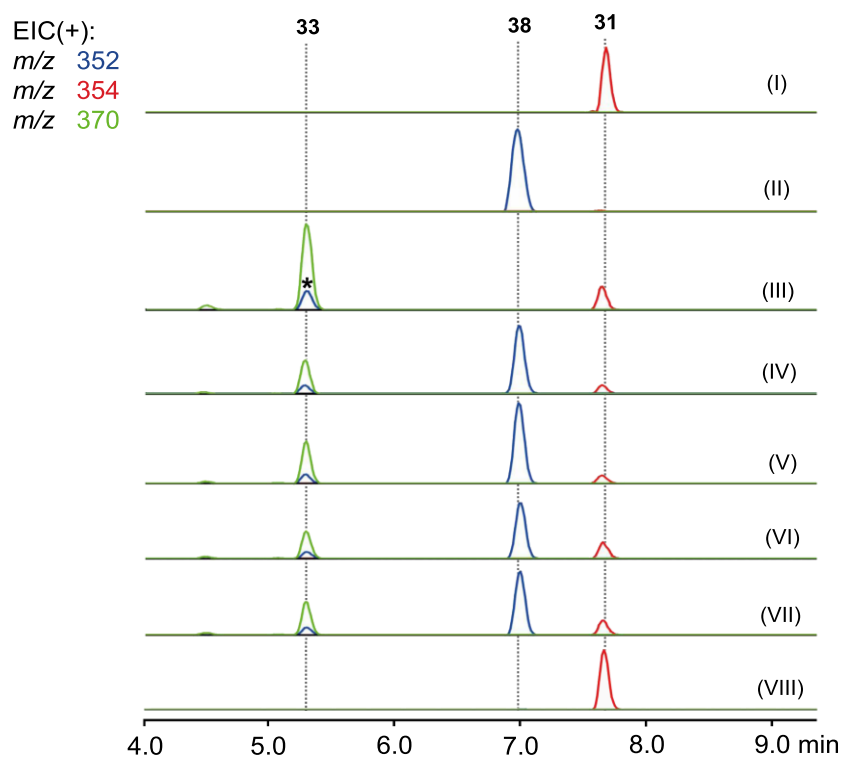

**Figure S17.** Detection of lysosome acidification of A549 cells and the uncropped NS5 production inhibition images. (A) Detection of lysosome acidification of A549 cells treated by compounds **5**, **9**, **10** and **16**. Two inhibitors chloroquine and bafilomycin were used as positive control and DMSO was used as negative control. Fluorescence was observed by confocal microscopy using a 60× objective lens. "BF" represents the view taken for cells in brightfield, "Fluorescence" represents the view of LysoTracker Red fluorescence, and "Merged" represents the view with BF merged with fluorescence. The images of "BF", "Merged" and "Fluorescence" have the same scale bars; and the images of "Amplified region" have the same scale bars. (B) The amplified presentation of the two images in the red dashed box in (A), showing the scale bars with measurement units. (C) and (D) The uncropped NS5 production inhibition images (corresponding to Figure 3B and 3C).

A

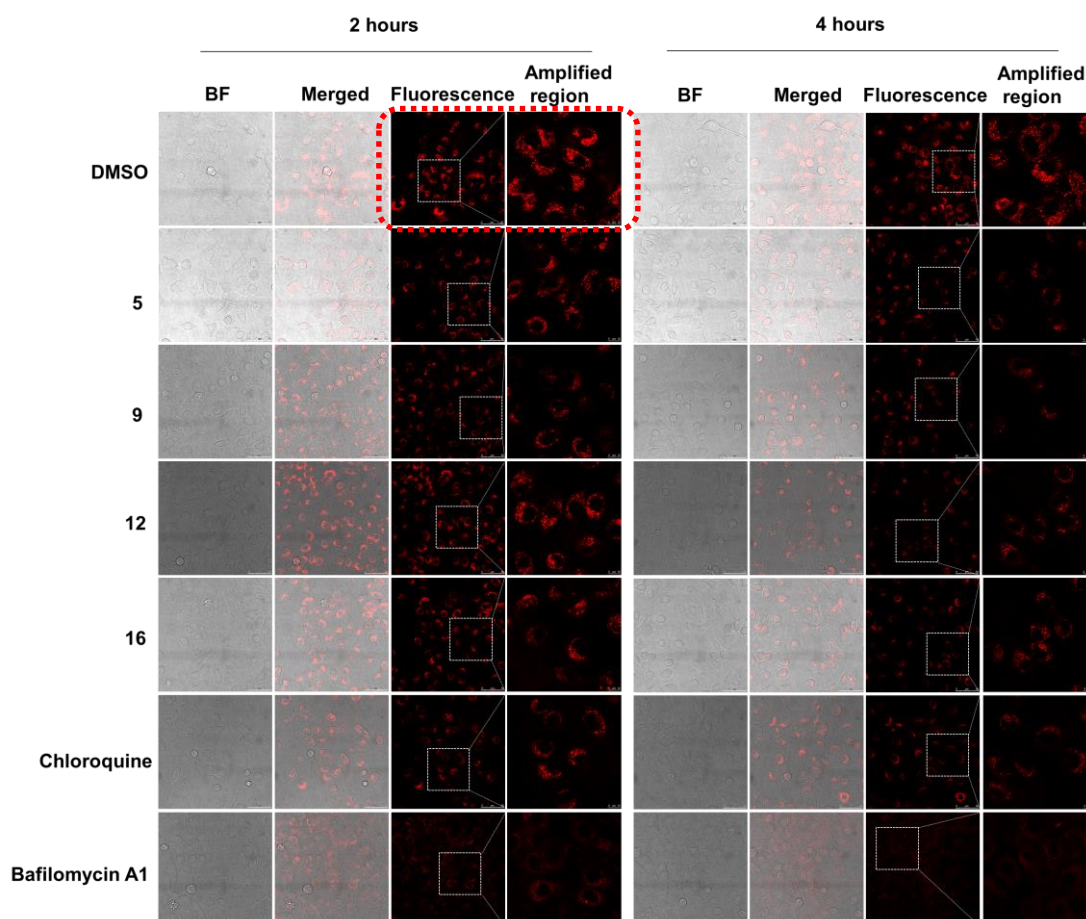

B

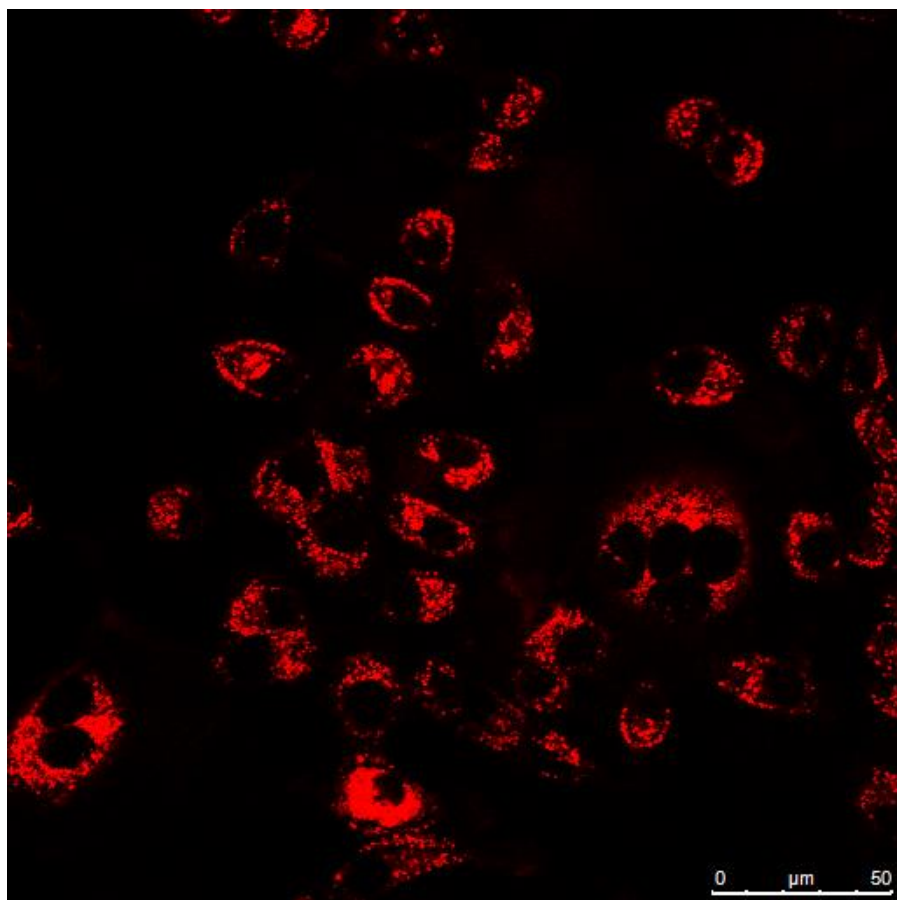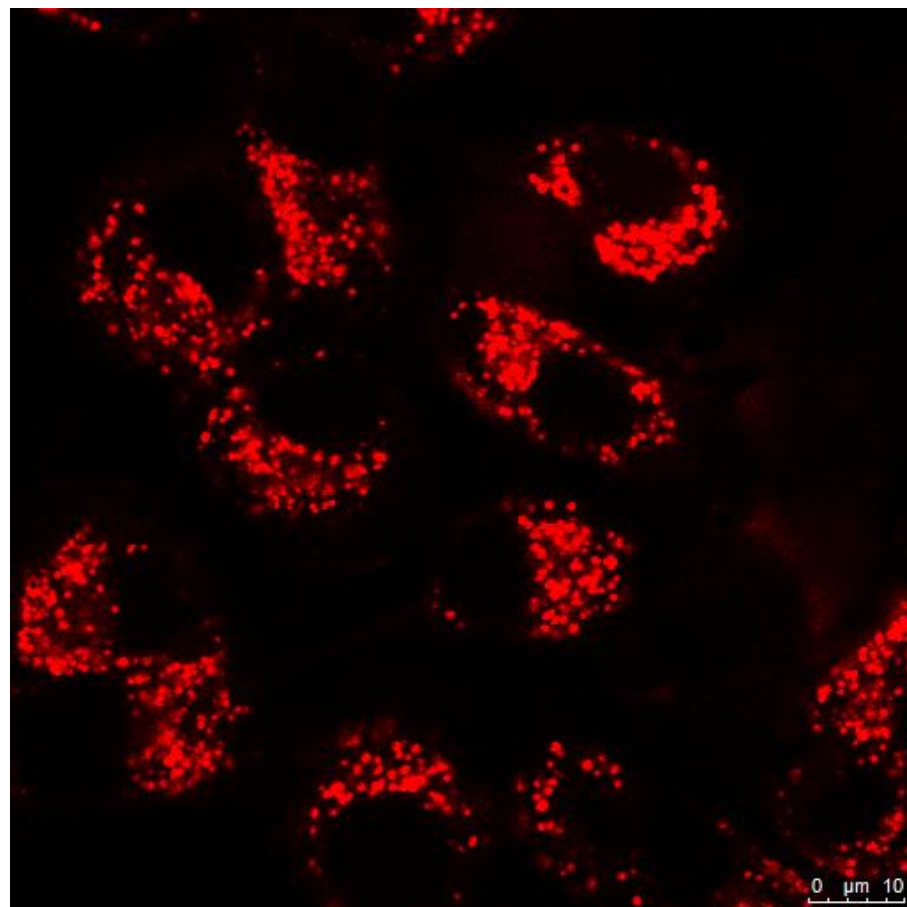

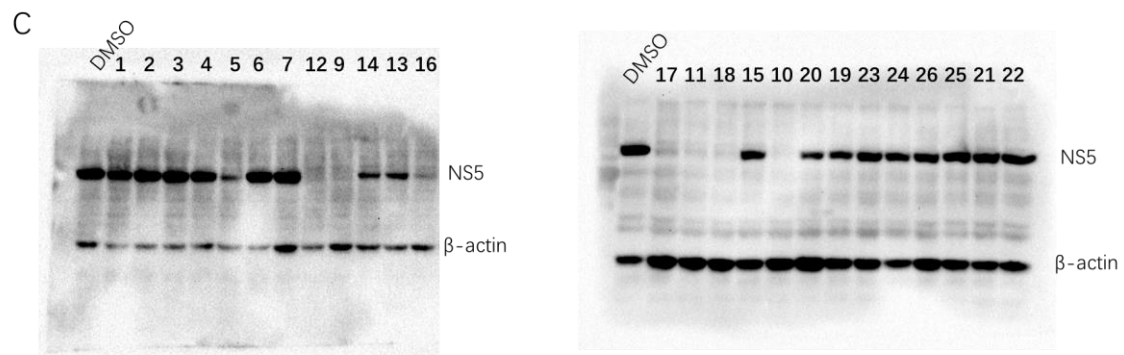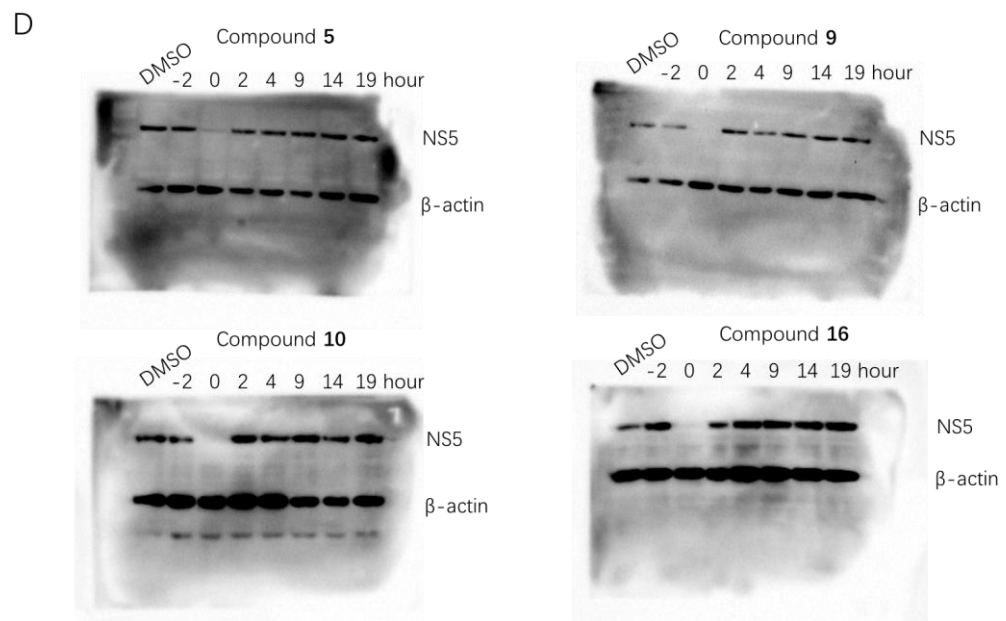

Figure S18.  $^1\text{H}$  NMR spectrum of **1** (600 MHz,  $\text{DMSO-}d_6$ ).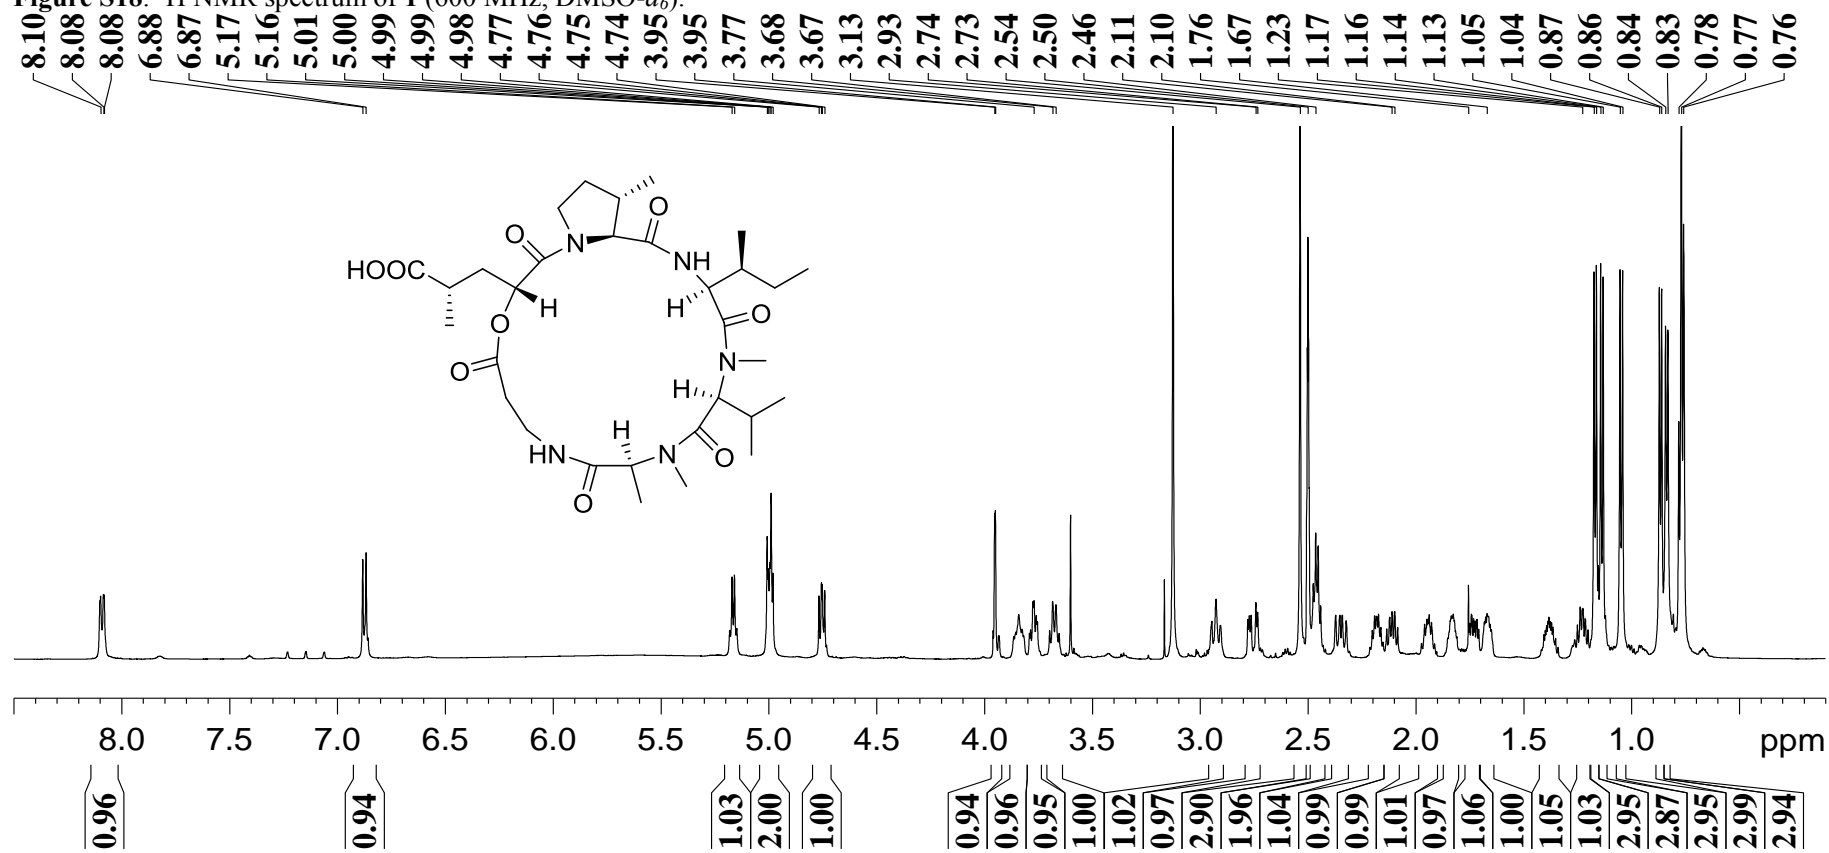

**Figure S19.**  $^{13}\text{C}$  APT spectrum of compound **1** (600 MHz,  $\text{DMSO-}d_6$ ).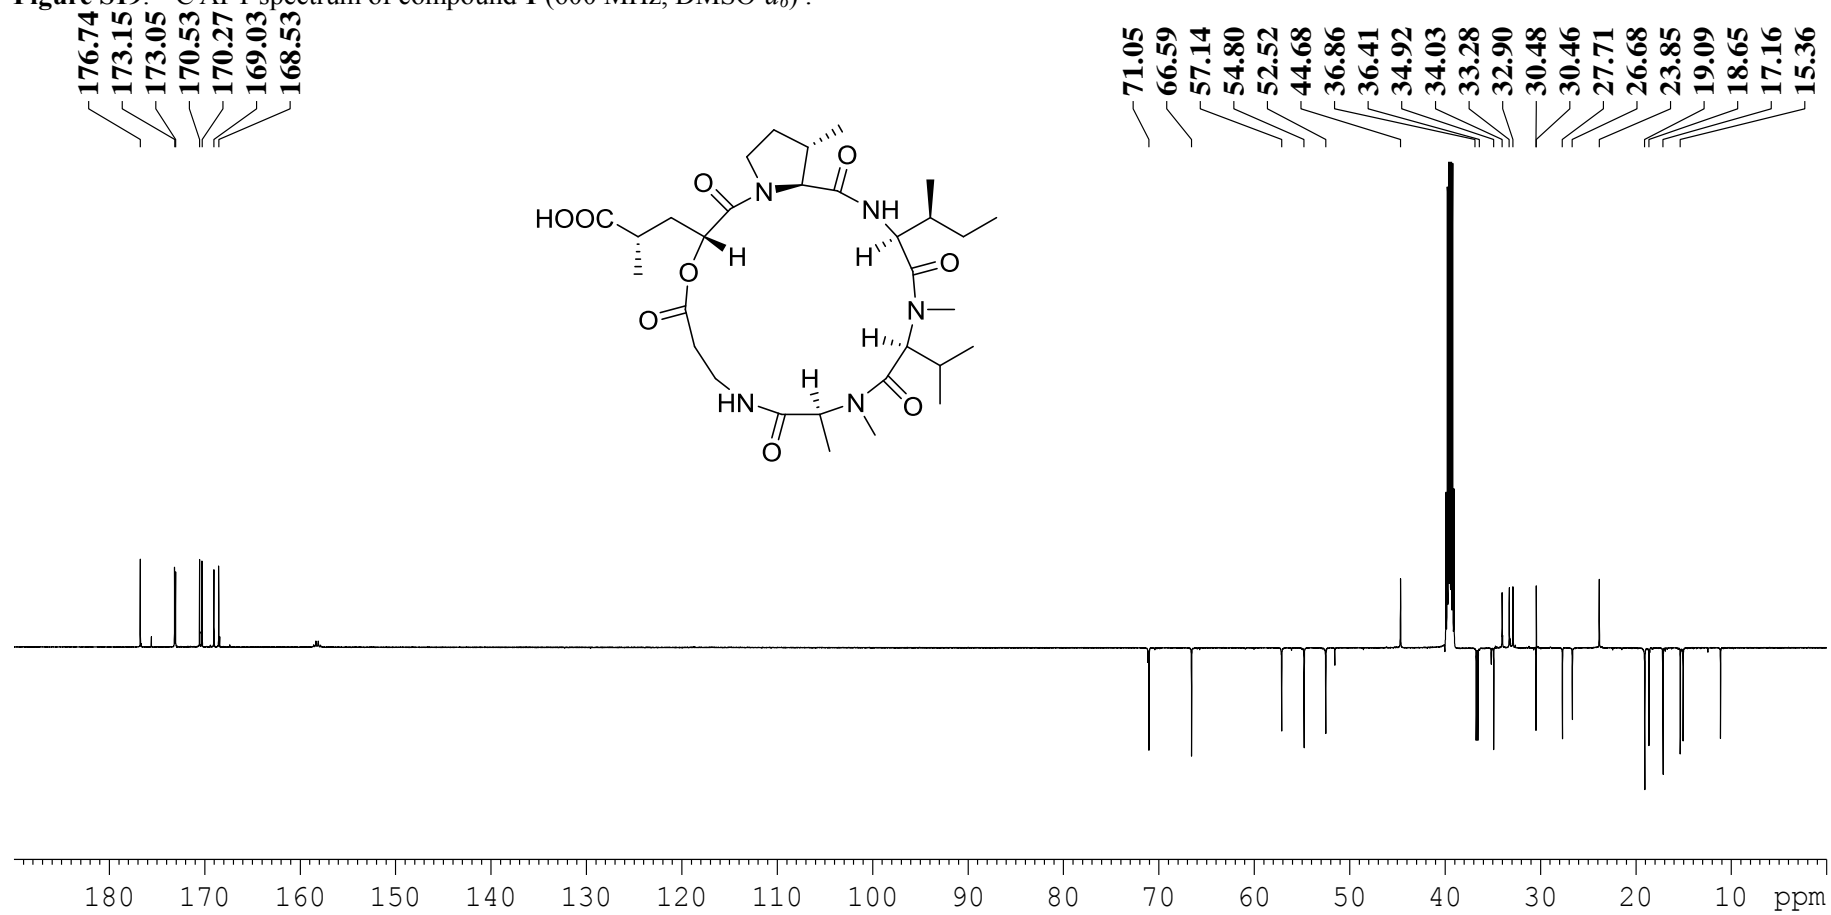

Figure S20.  $^1\text{H}$ - $^1\text{H}$  COSY spectrum of compound 1.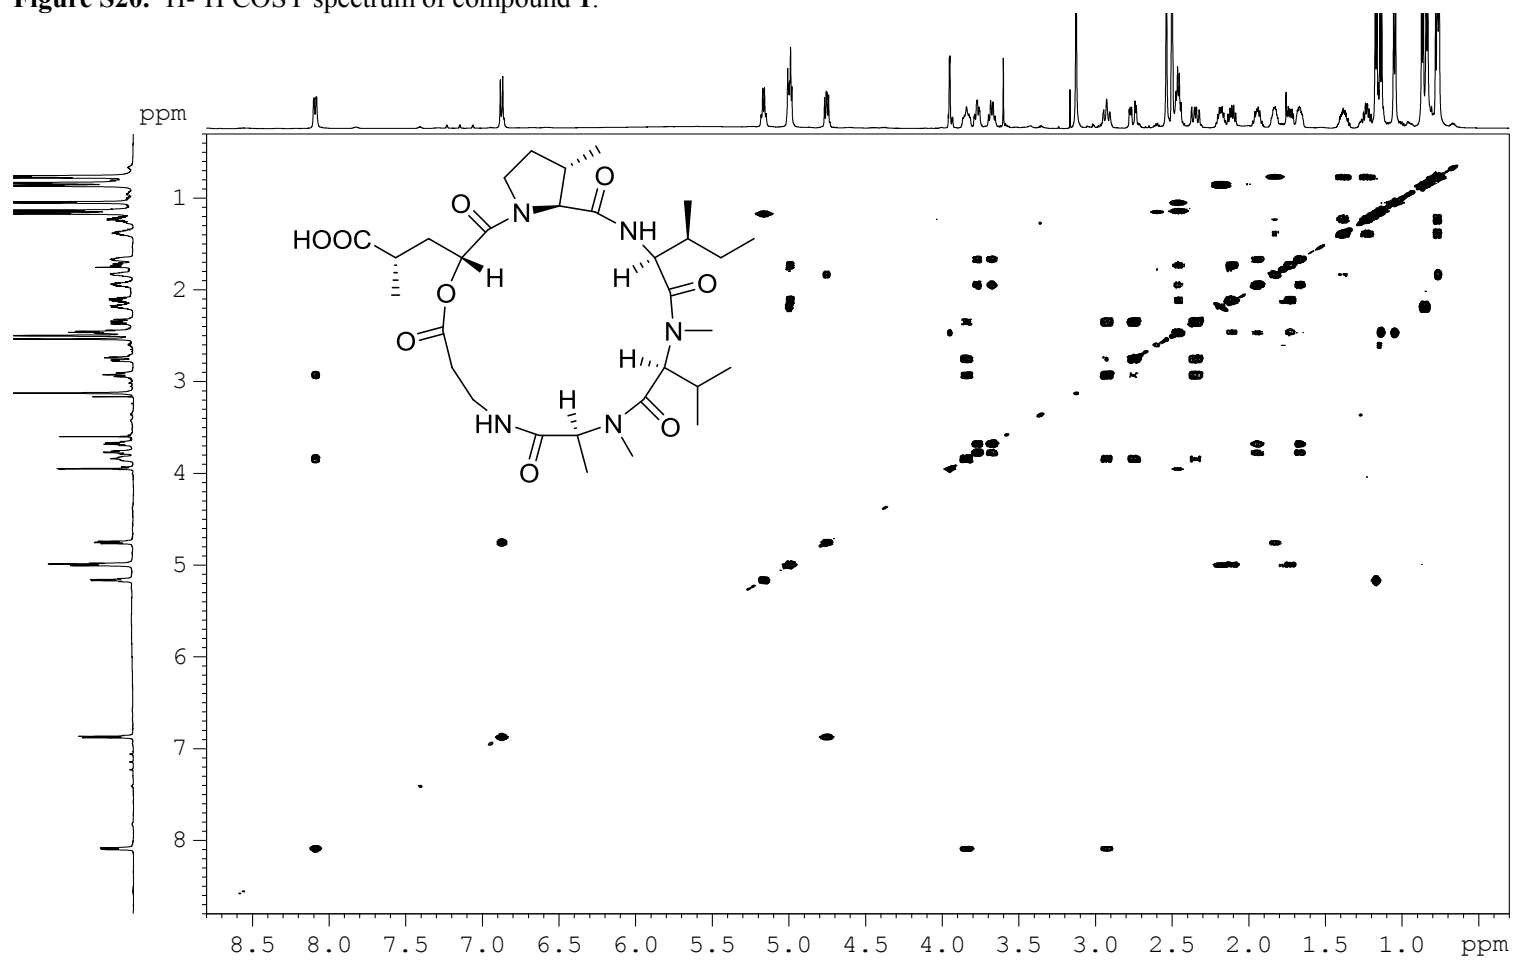

Figure S21. HSQC spectrum of compound 1.

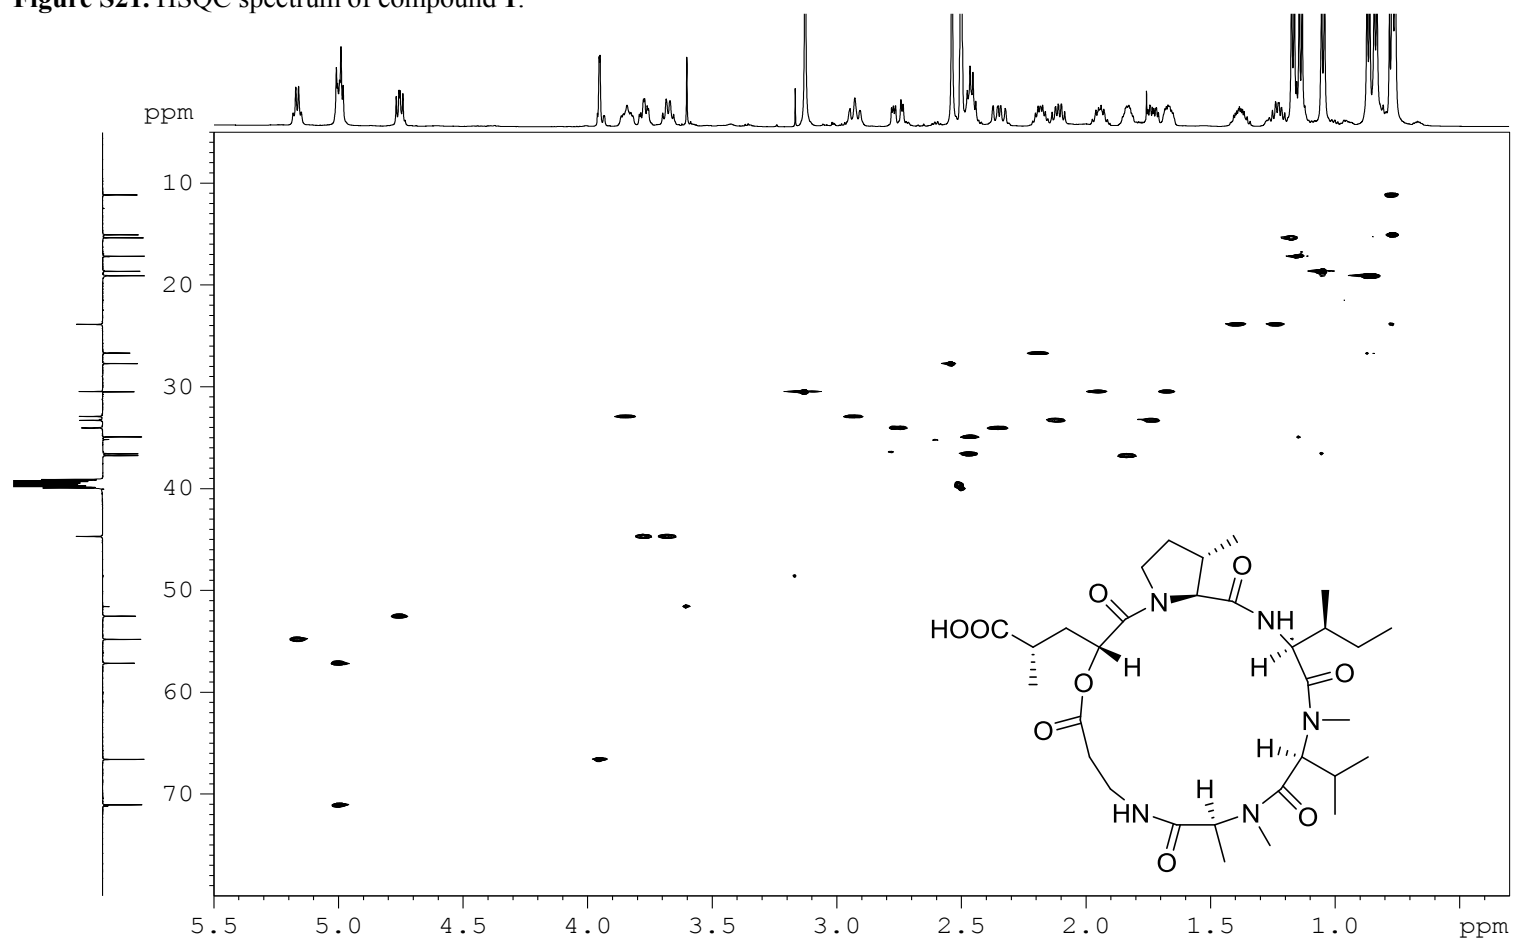



Figure S22. HMBC spectrum of compound 1.

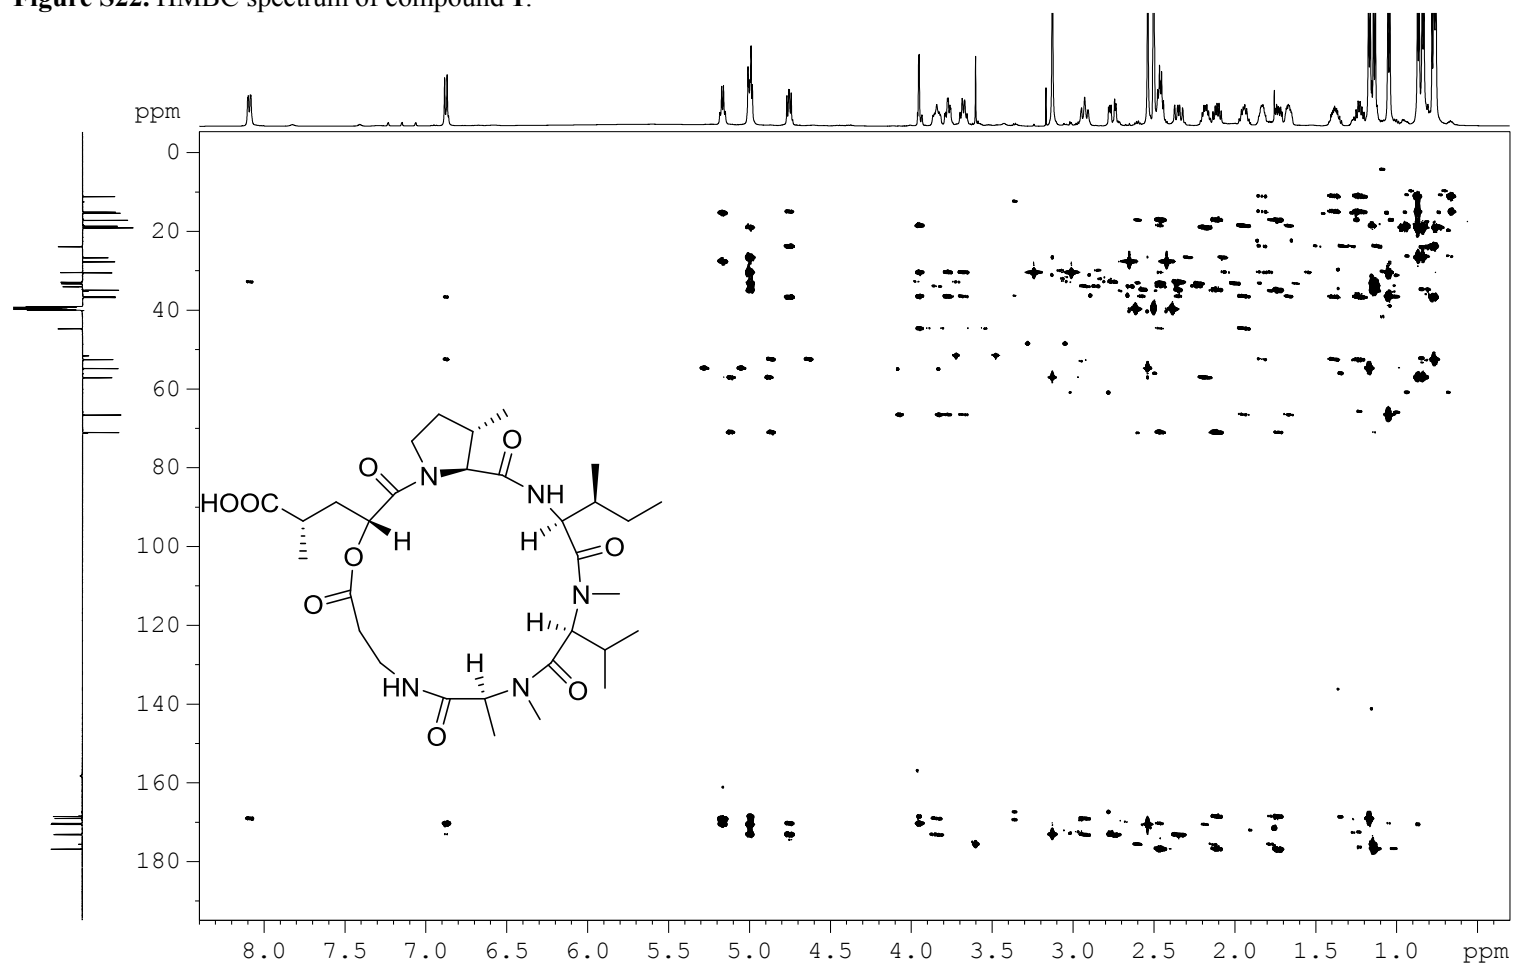

Figure S23. NOESY spectrum of compound 1.

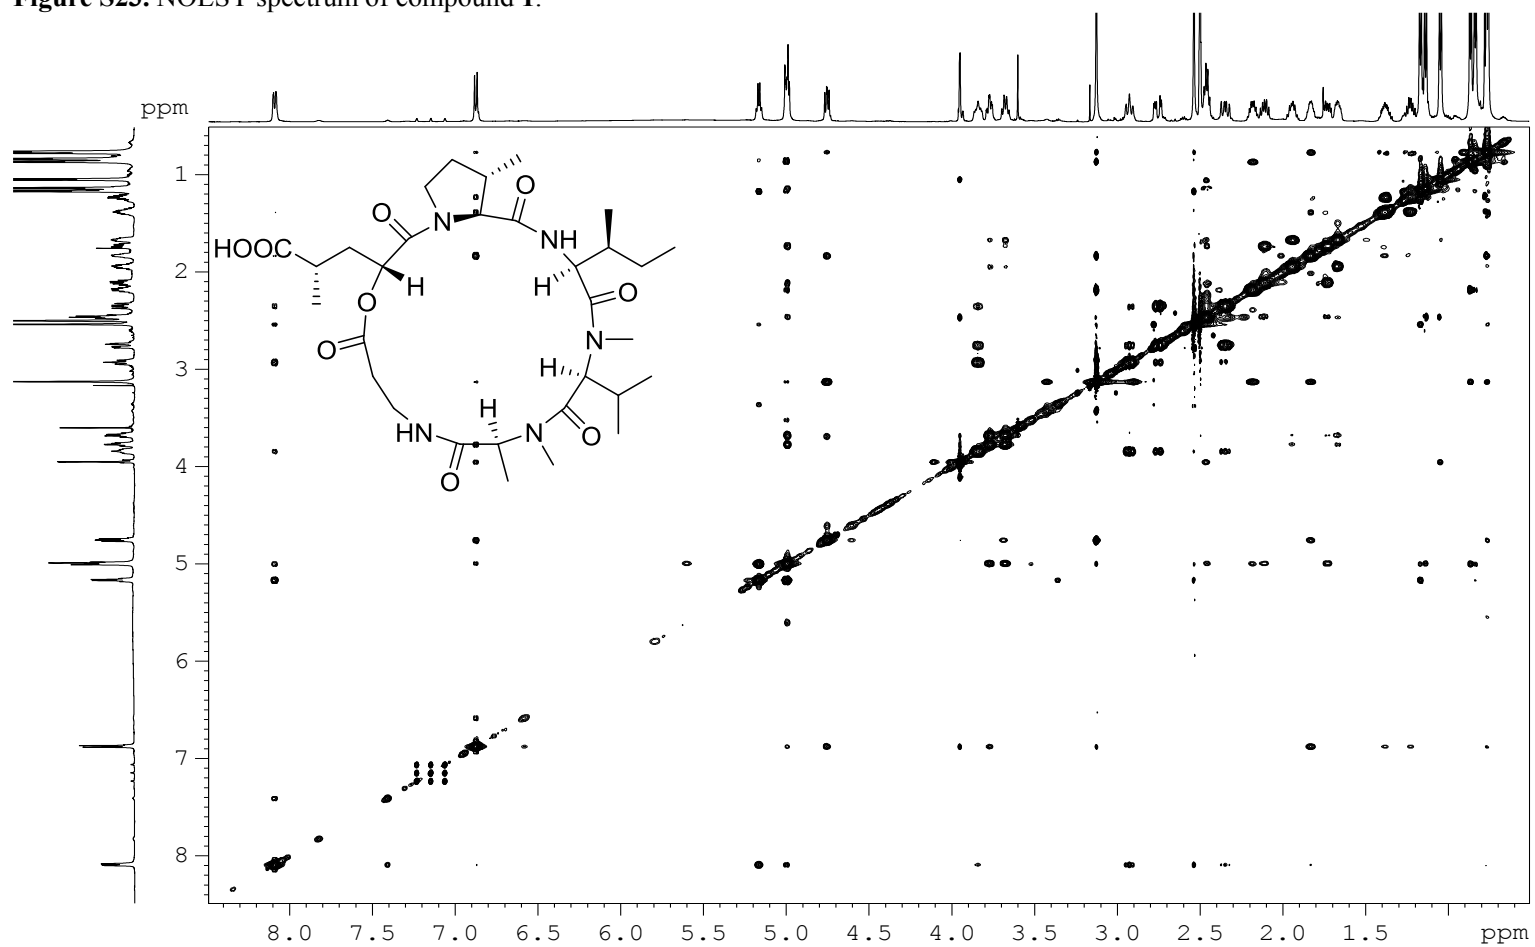

Figure S24. IR of compound 1.

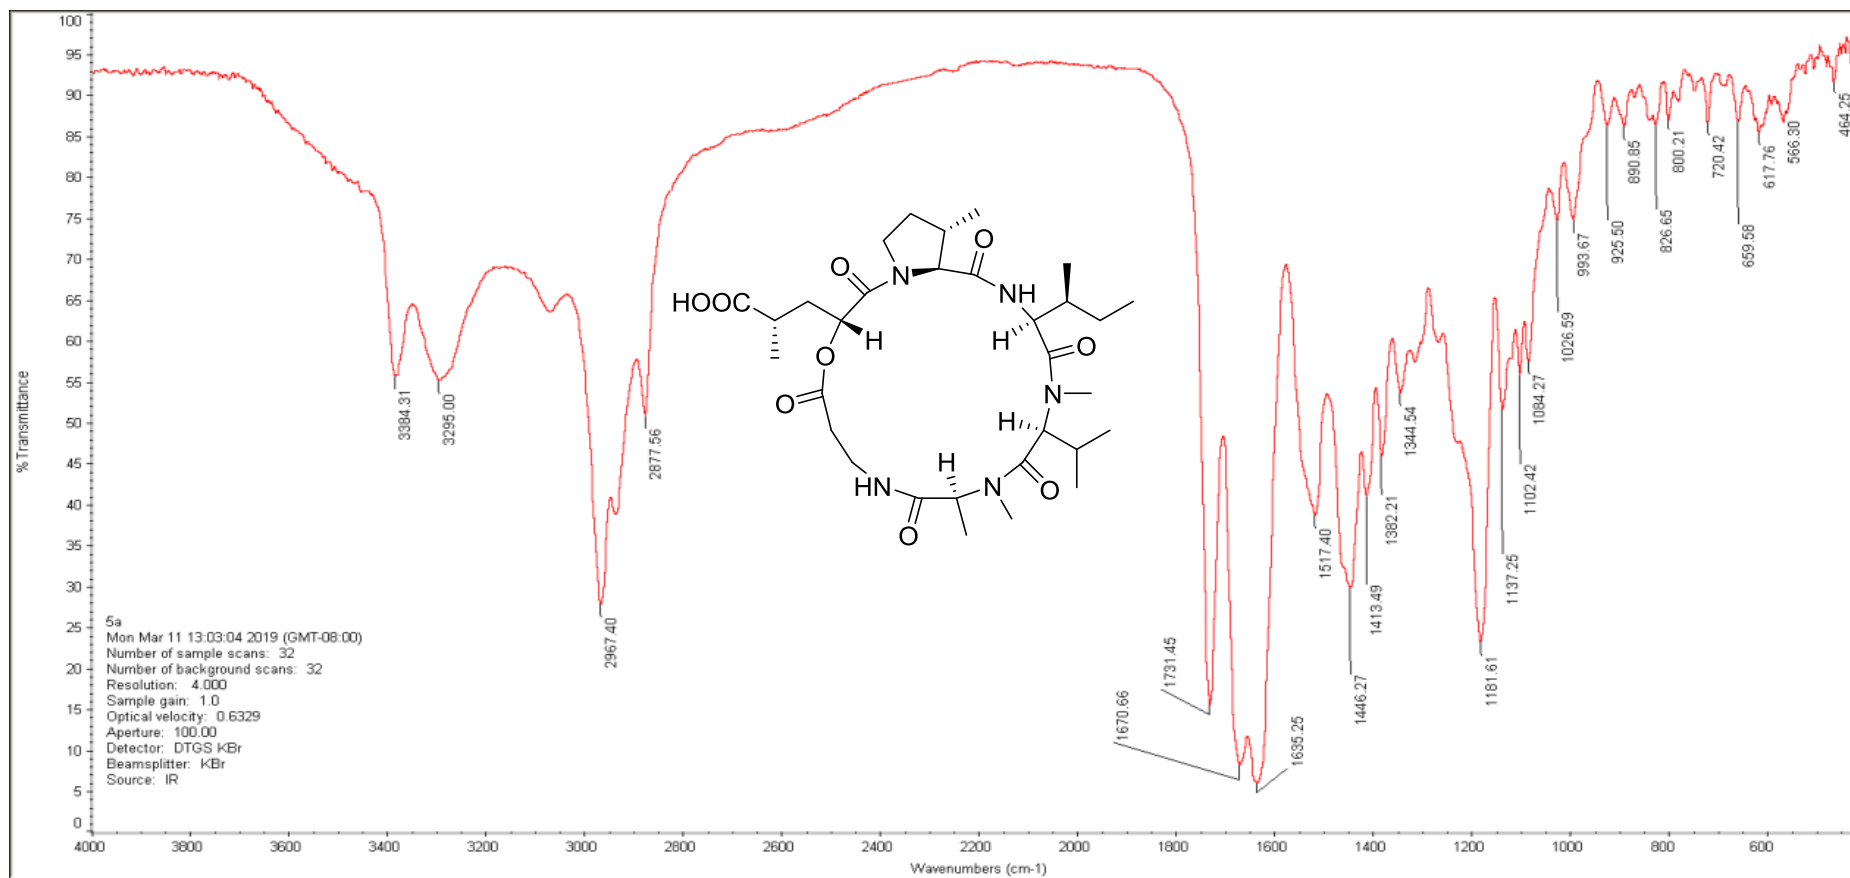

**Figure S25.** HRESIMS of compound **1**.

Xevo G2 Q-TOF/YCA166#

4-6-f-1 HR 12 (0.233) Cm (10:18-(2:6+31:52))

26-Apr-2018

Waters  
1: TOF MS ES+  
9.87e5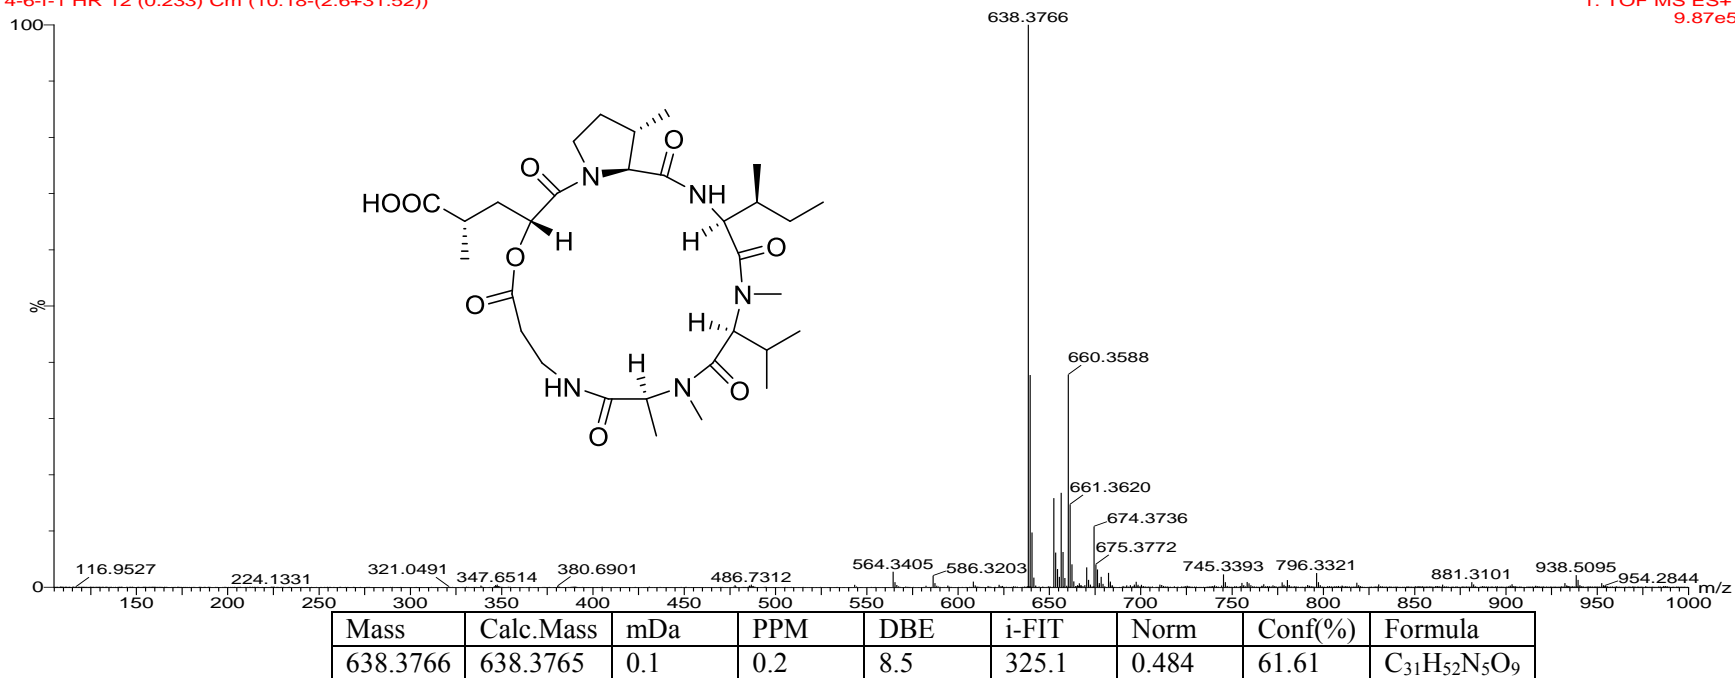

Figure S26.  $^1\text{H}$  NMR spectrum of compound 2 (600 MHz,  $\text{DMSO-}d_6$ ).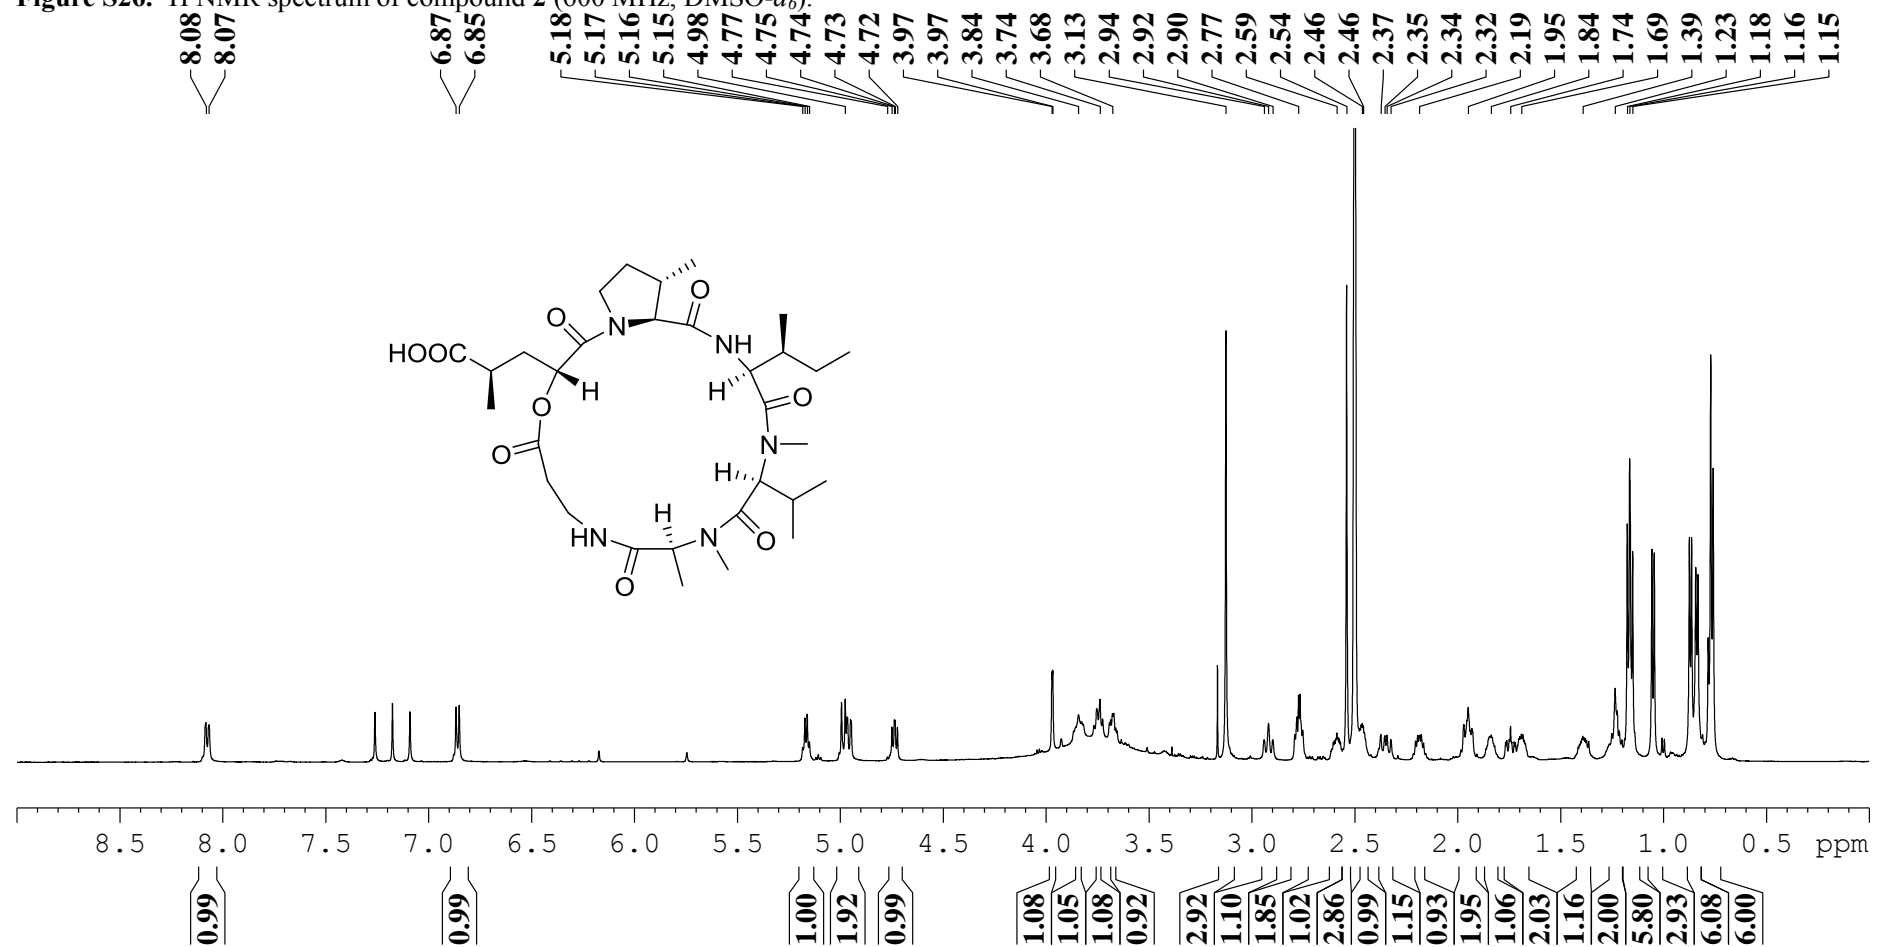

**Figure S27.**  $^{13}\text{C}$  APT spectrum of compound **2** (600 MHz,  $\text{DMSO-}d_6$ ).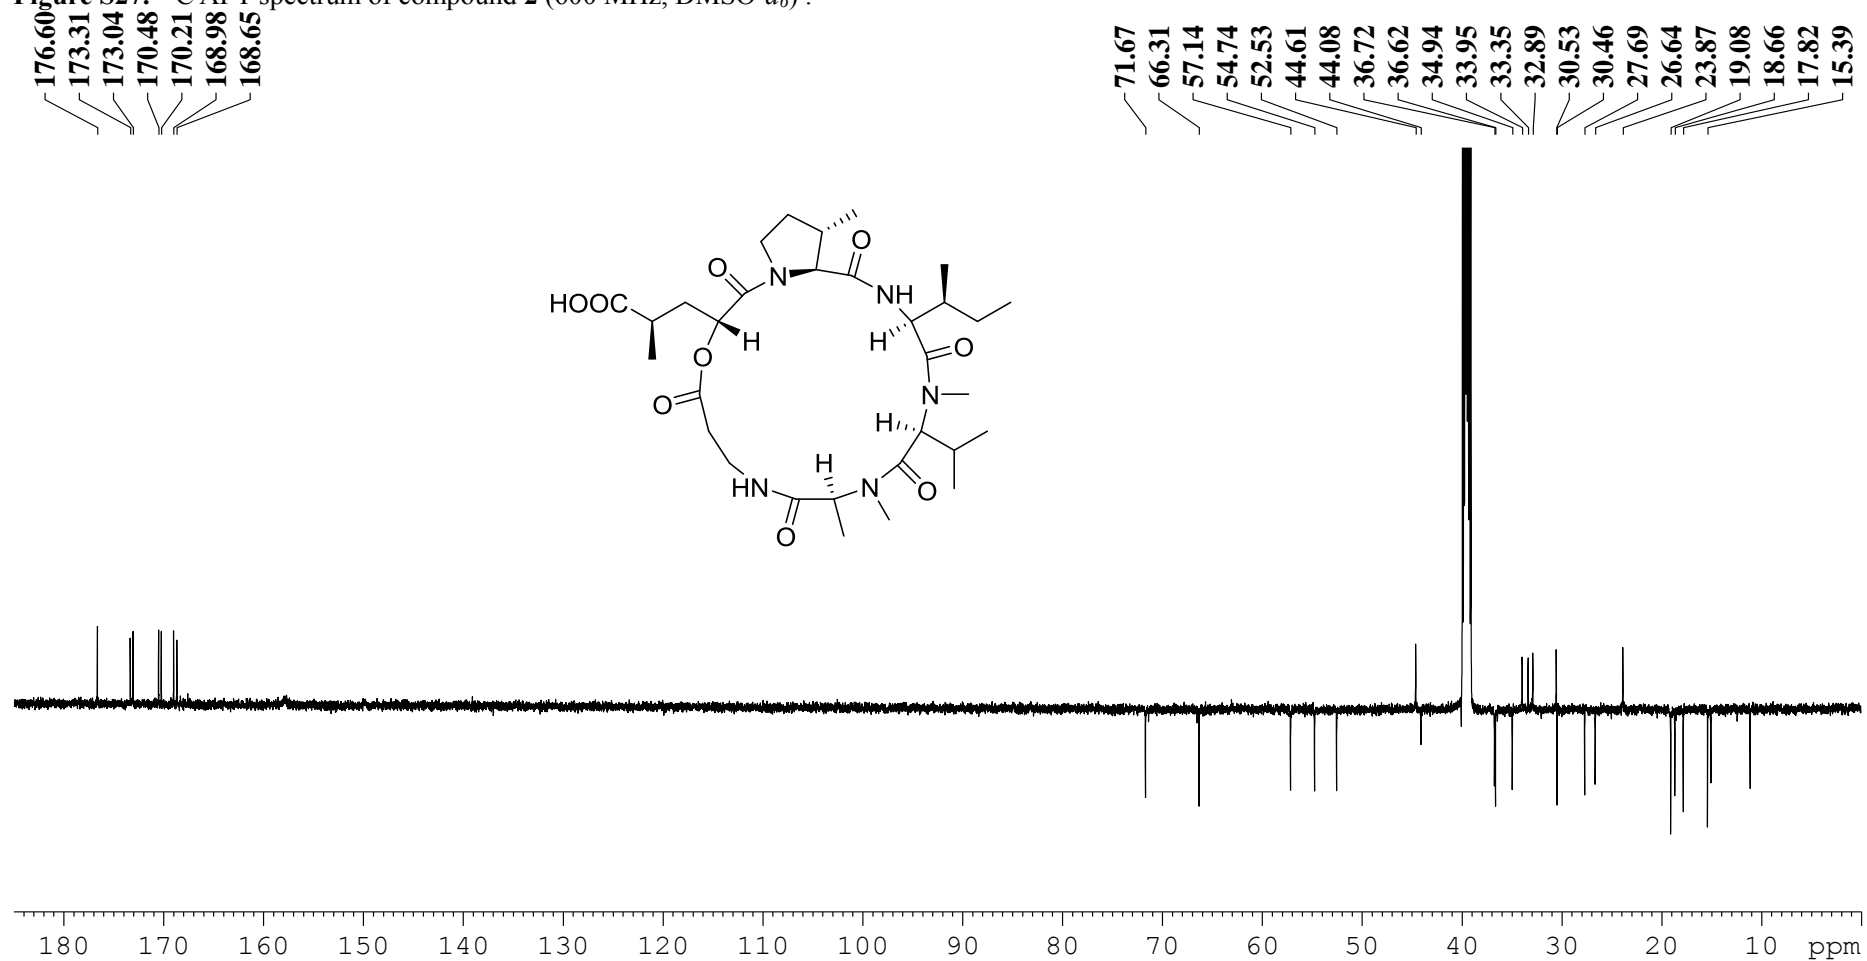

Figure S28.  $^1\text{H}$ - $^1\text{H}$  COSY spectrum of compound 2.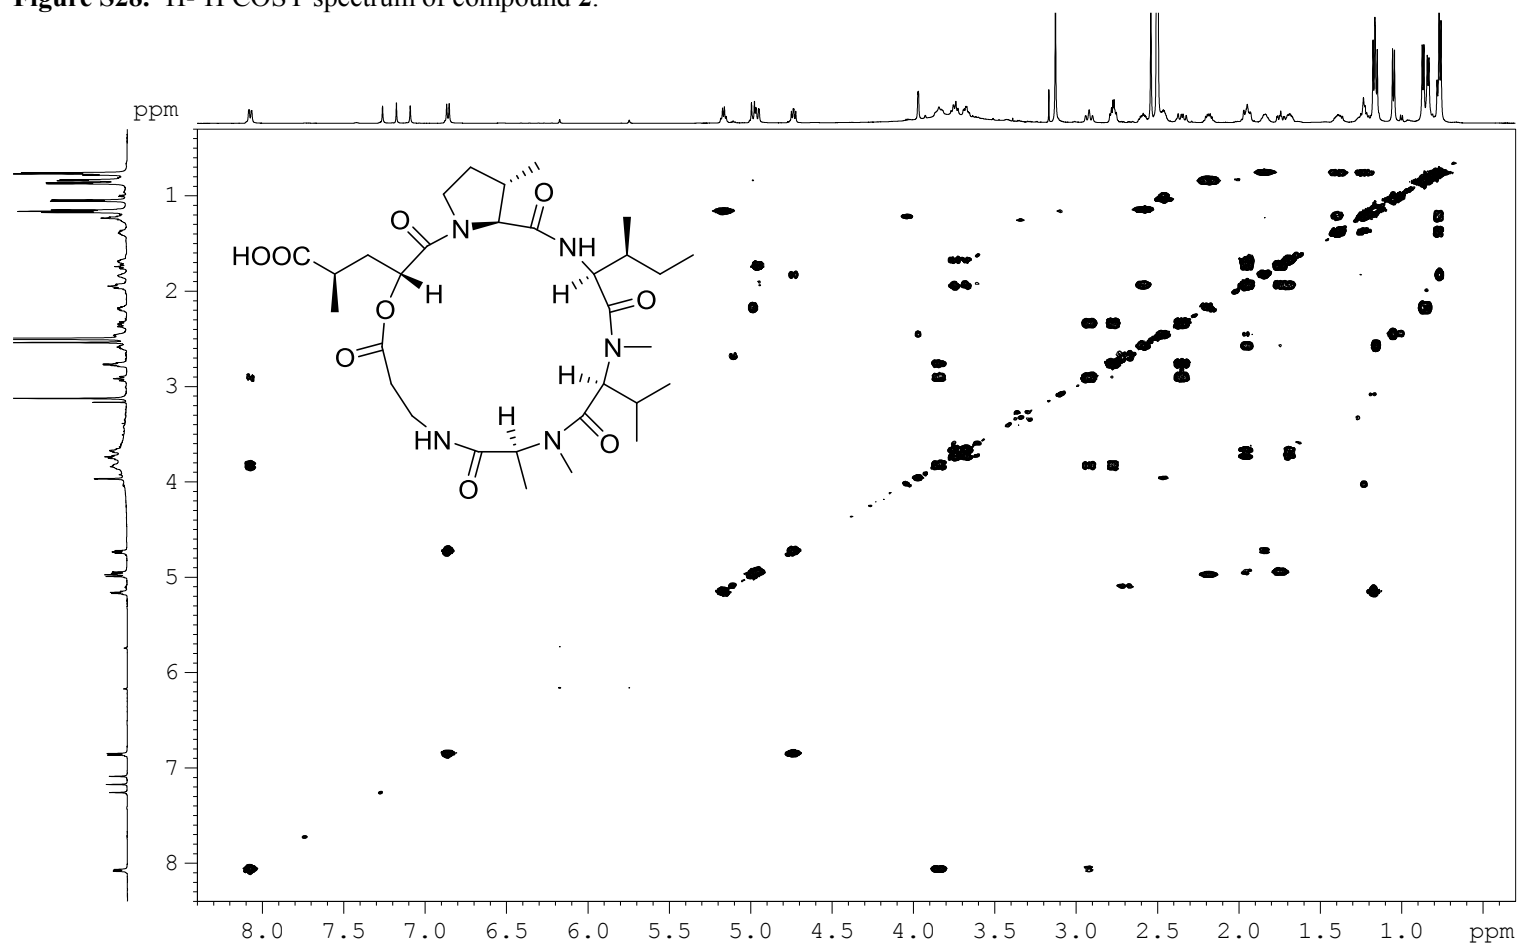

Figure S29. HSQC spectrum of compound 2.

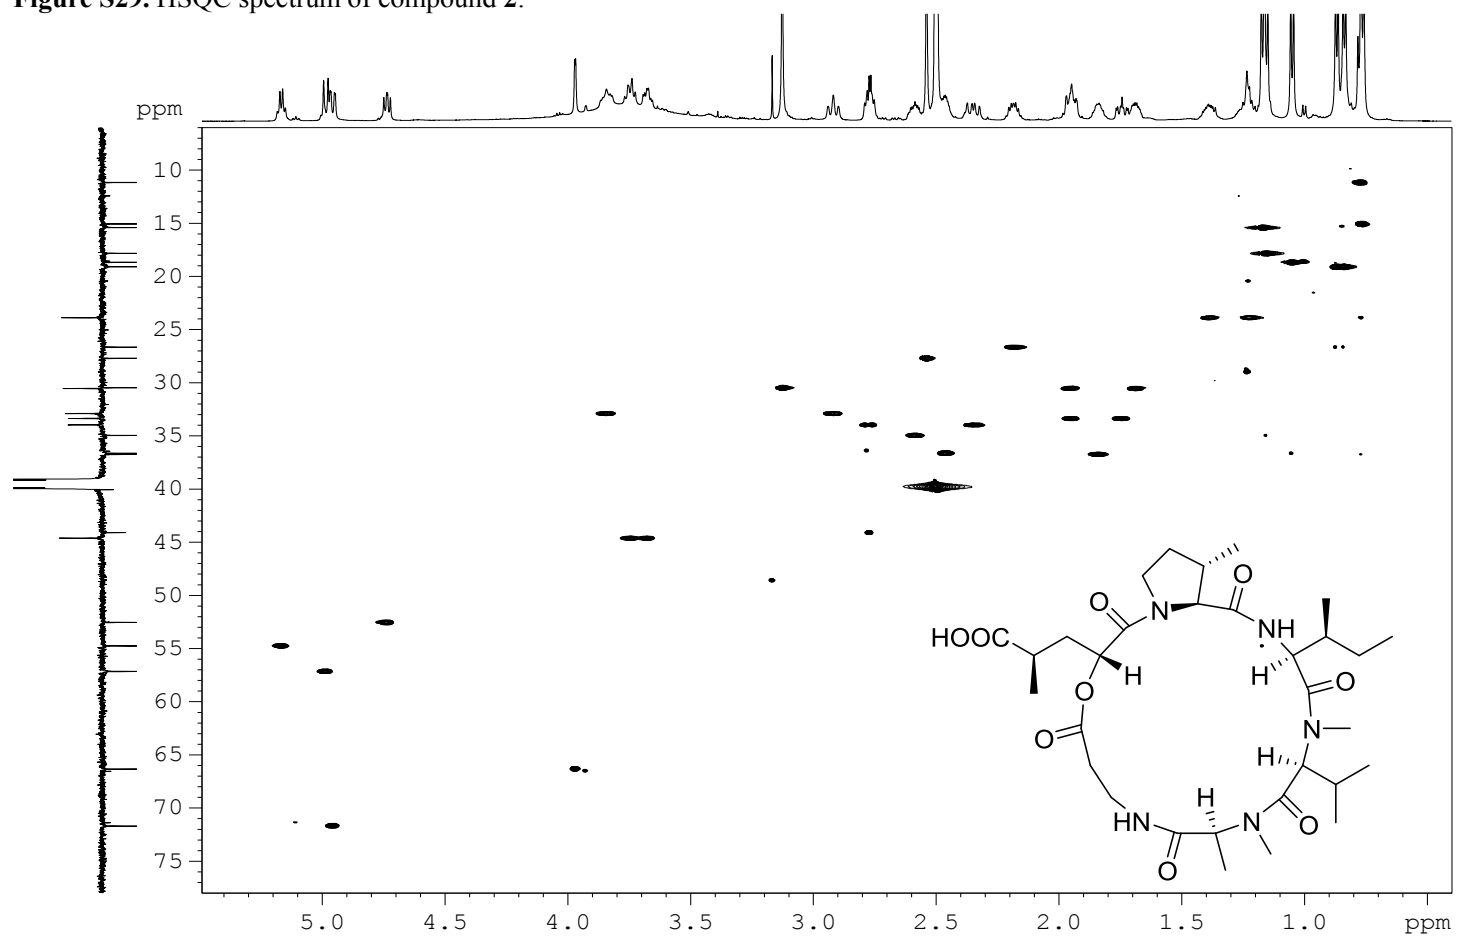



Figure S30. HMBC spectrum of compound 2.

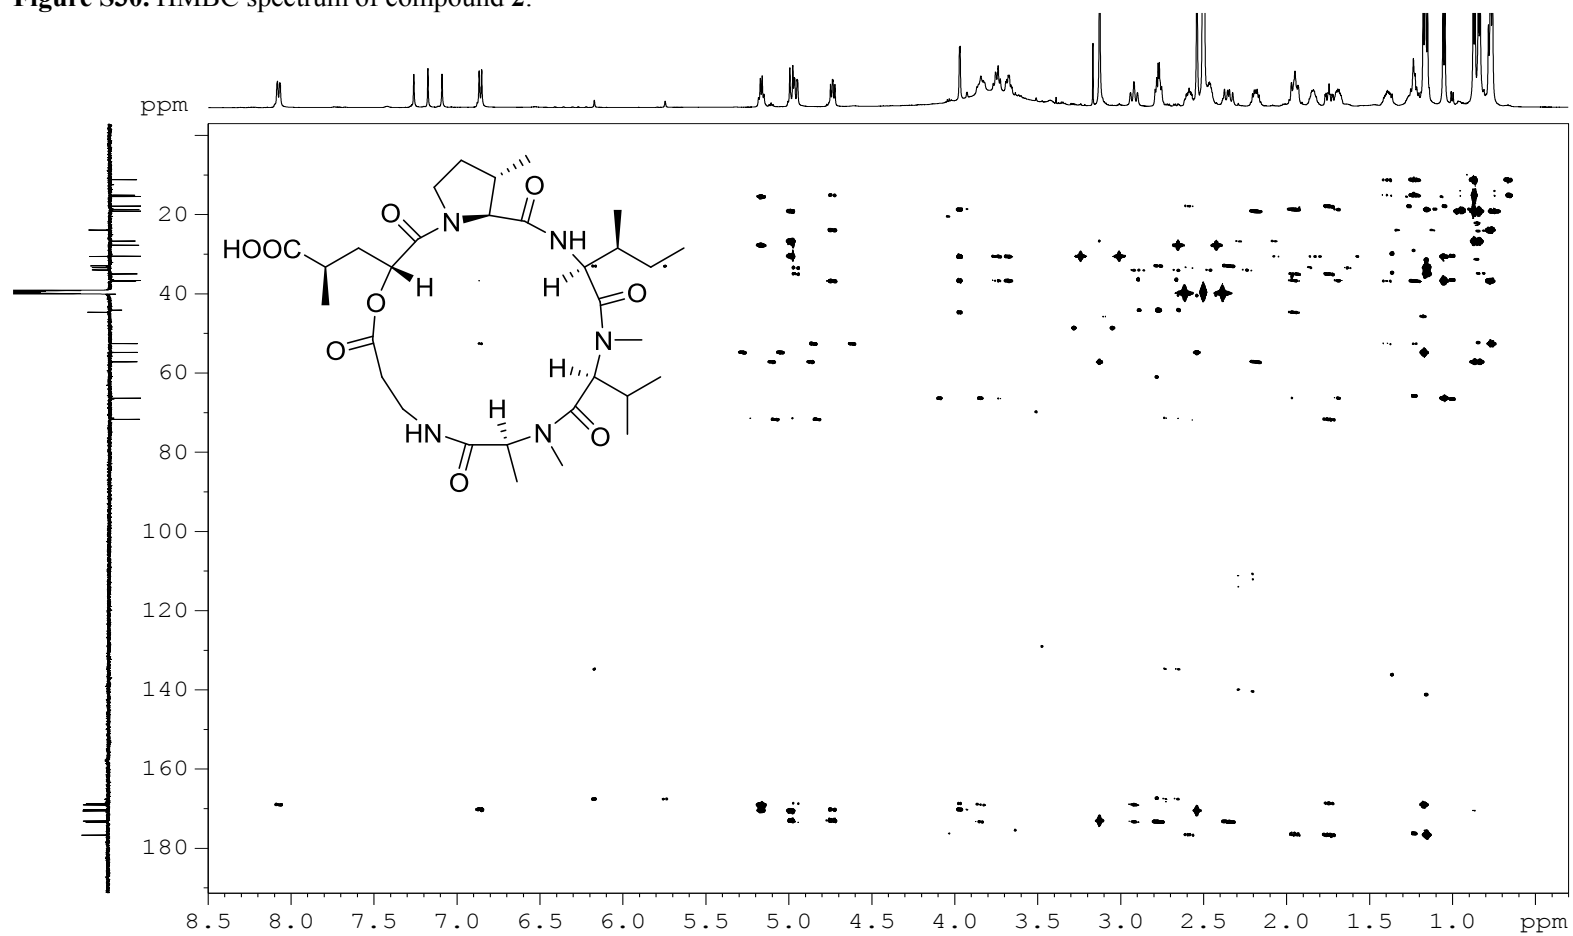

Figure S31. NOESY spectrum of compound 2.

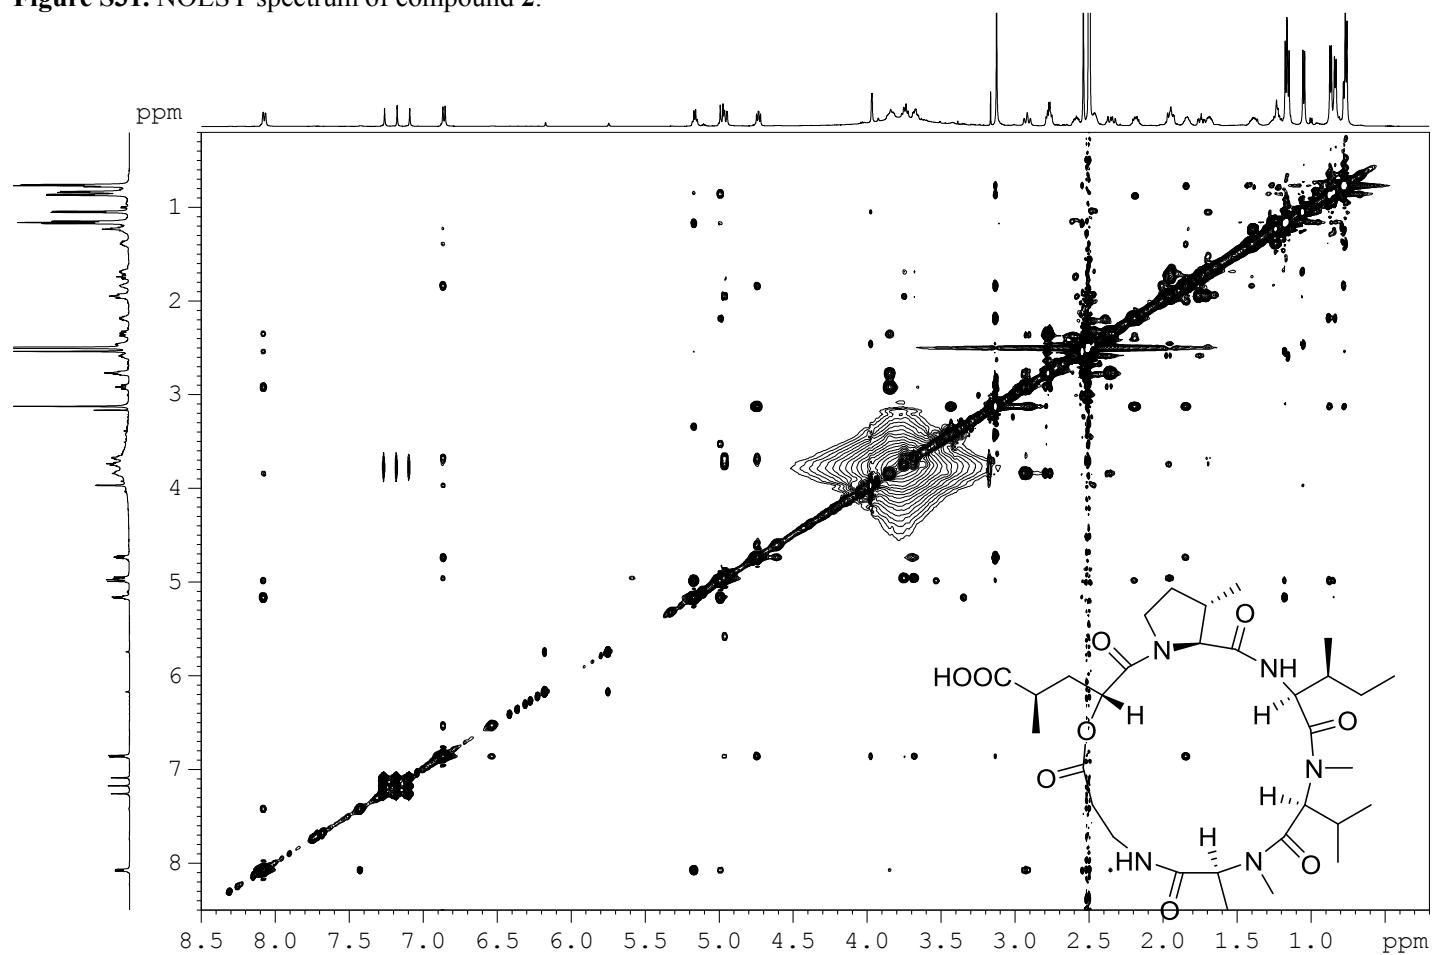

Figure S32. IR of compound 2.

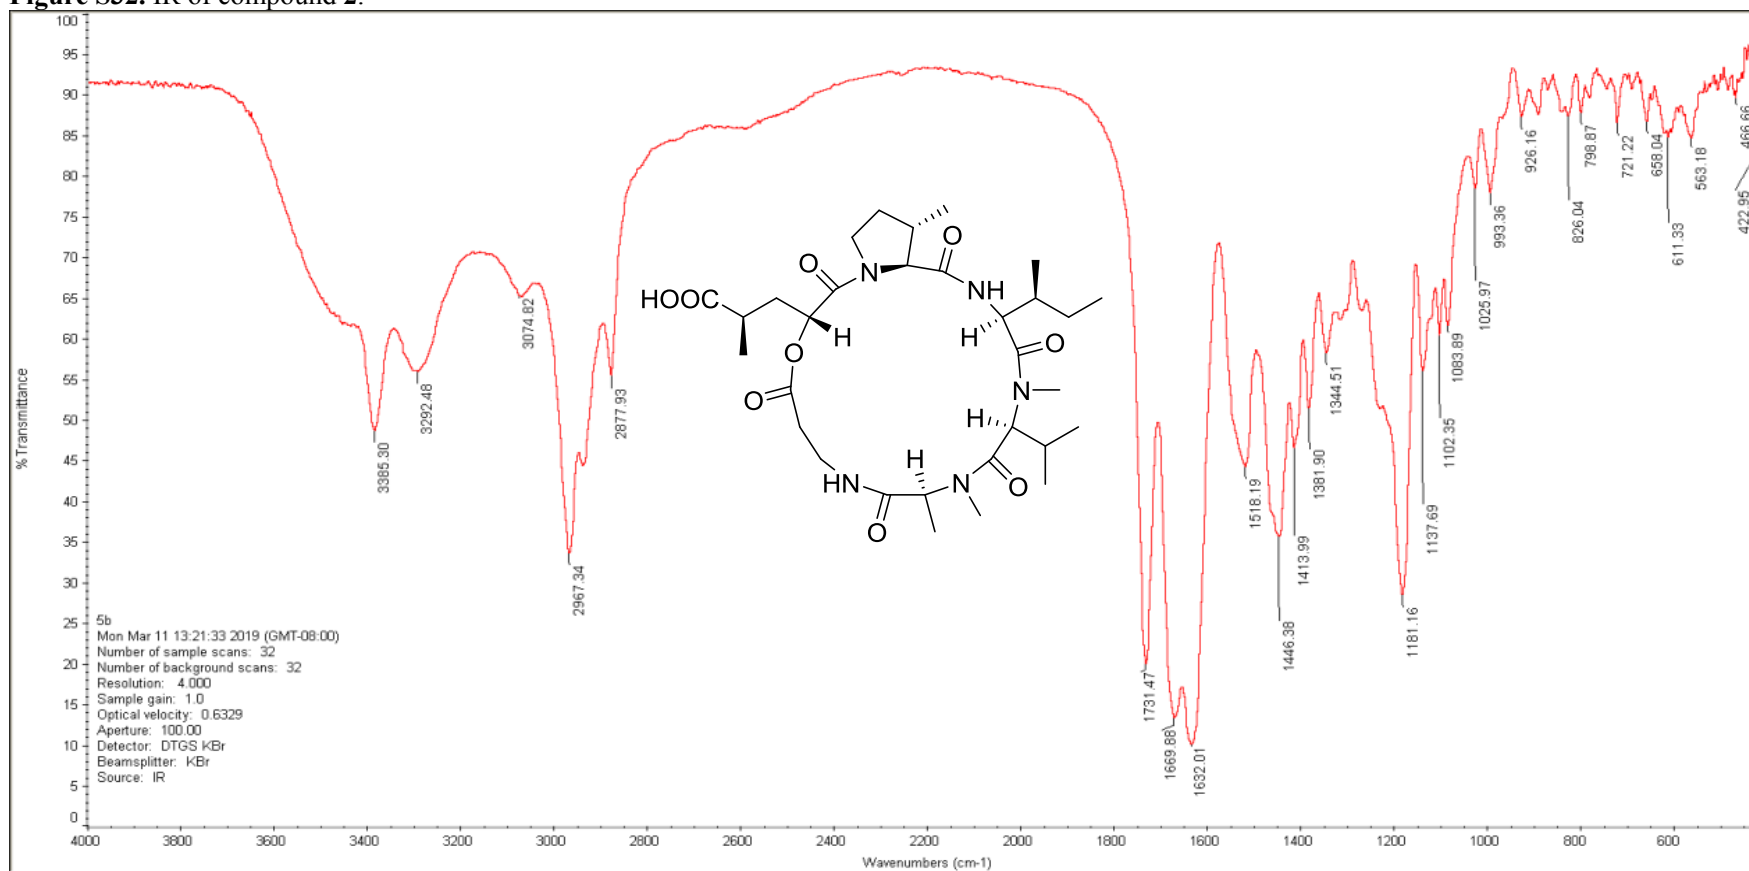

**Figure S33.** HRESIMS of compound **2**.

Xevo G2 Q-TOF/YCA166#

4-6-f-a-4 HR 12 (0.233) Cm (10:17-(2:6+26:54))

26-Apr-2018

Waters

1: TOF MS ES+  
5.38e5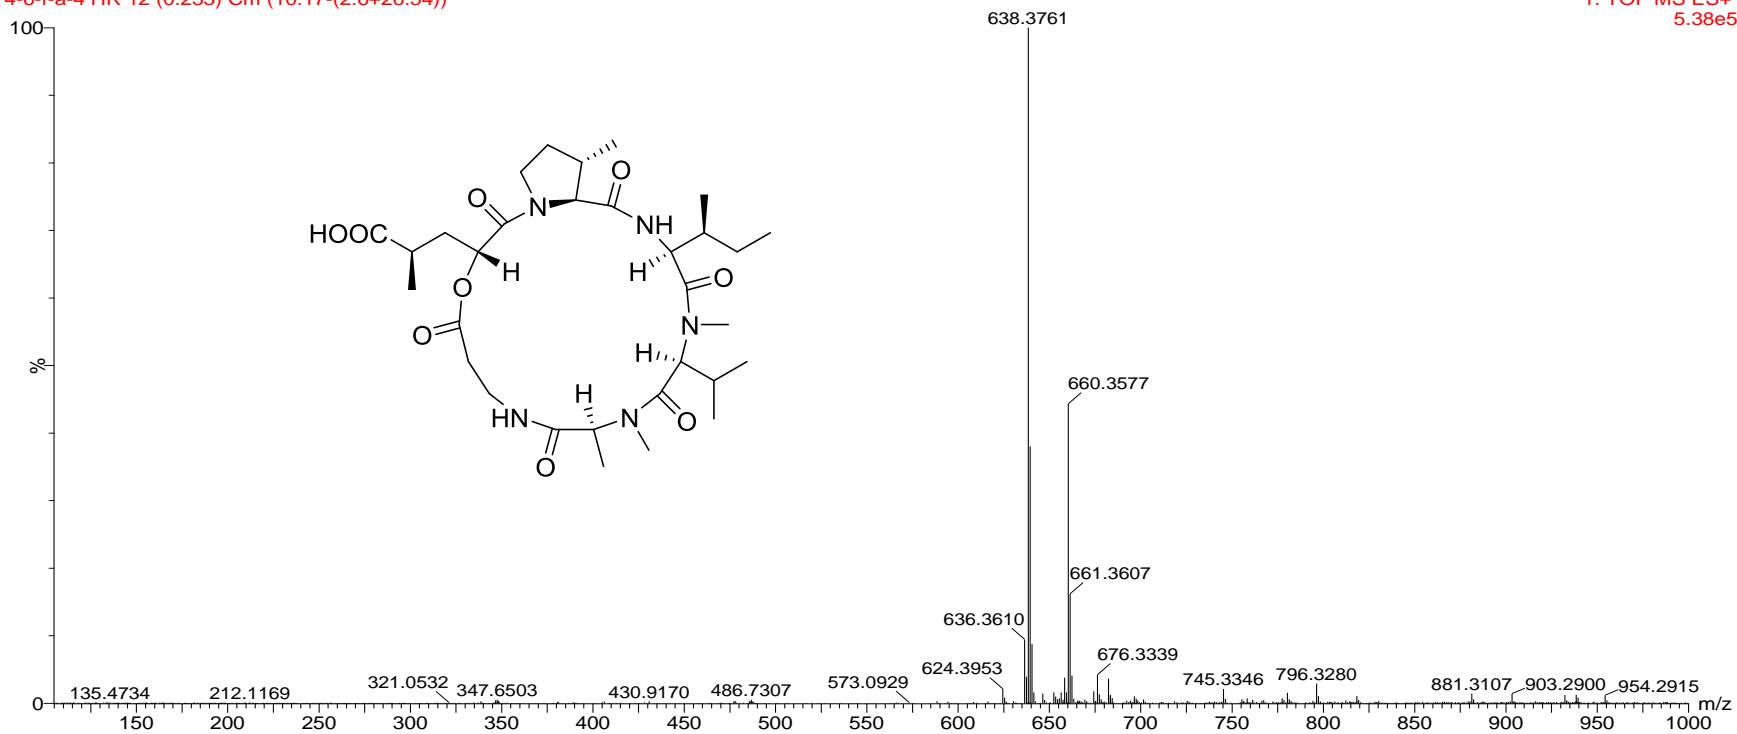

| Mass     | Calc.Mass | mDa  | PPM  | DBE | i-FIT | Norm  | Conf(%) | Formula                                                       |
|----------|-----------|------|------|-----|-------|-------|---------|---------------------------------------------------------------|
| 638.3761 | 638.3765  | -0.4 | -0.6 | 8.5 | 193.7 | 1.062 | 64.57   | C <sub>31</sub> H <sub>52</sub> N <sub>5</sub> O <sub>9</sub> |

**Figure S34.**  $^1\text{H}$  NMR spectrum of compound **3** (600 MHz,  $\text{DMSO-}d_6$ ).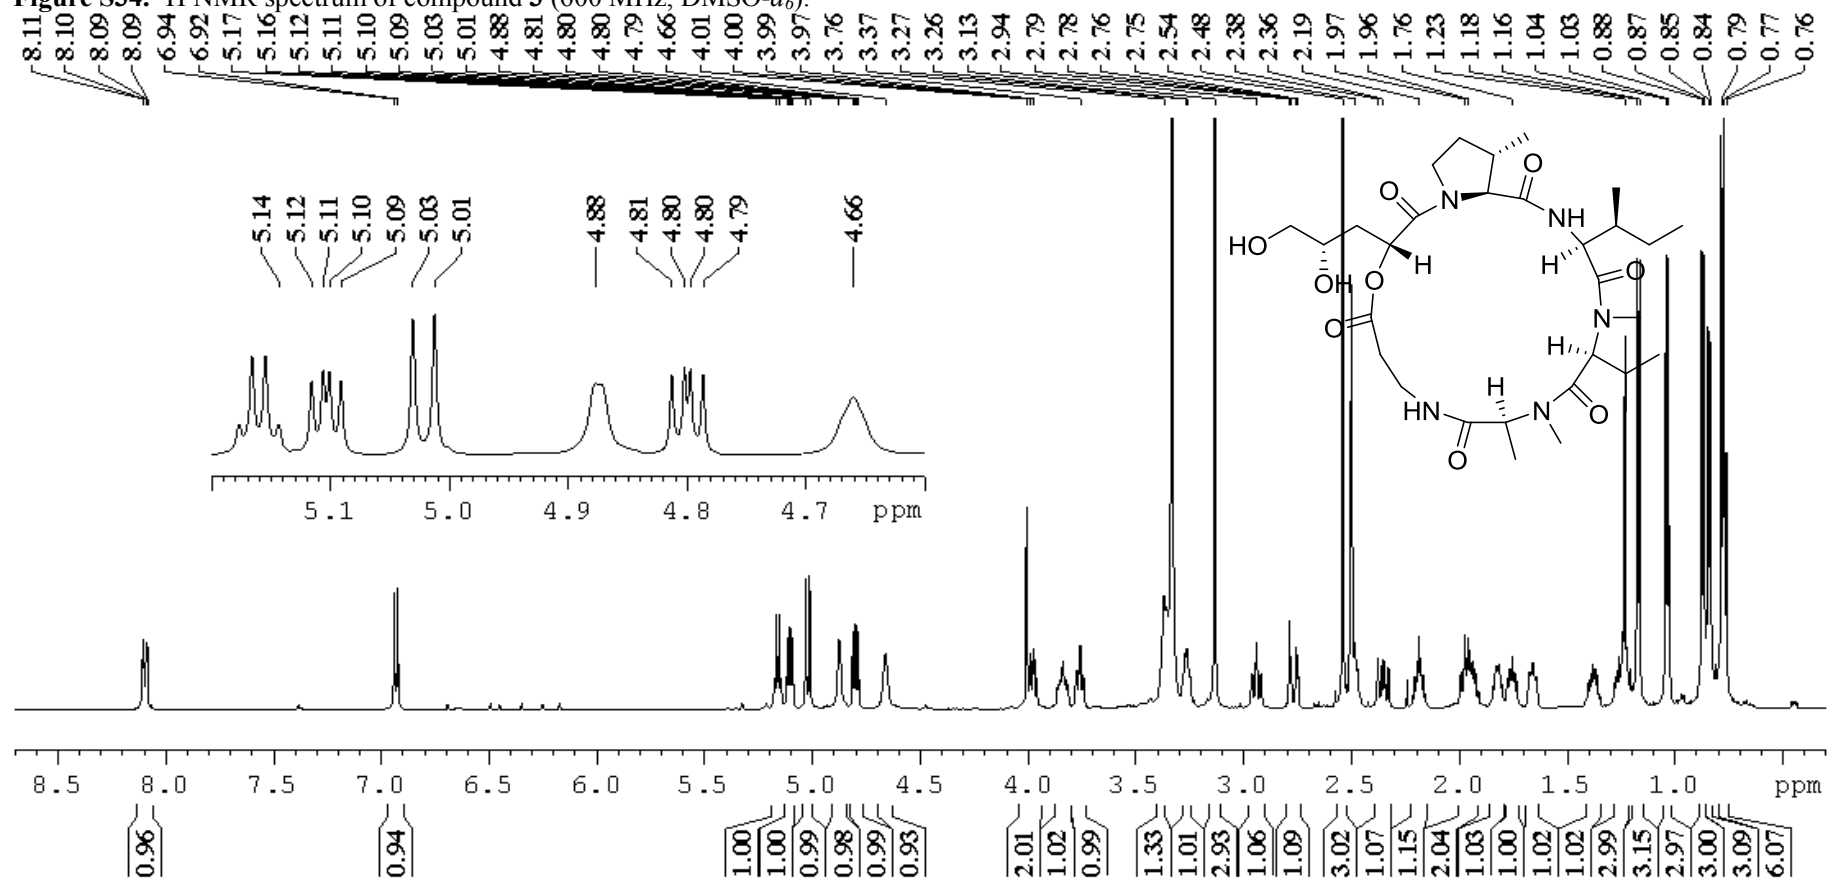

**Figure S35.**  $^{13}\text{C}$  APT spectrum of compound **3** (600 MHz,  $\text{DMSO-}d_6$ ).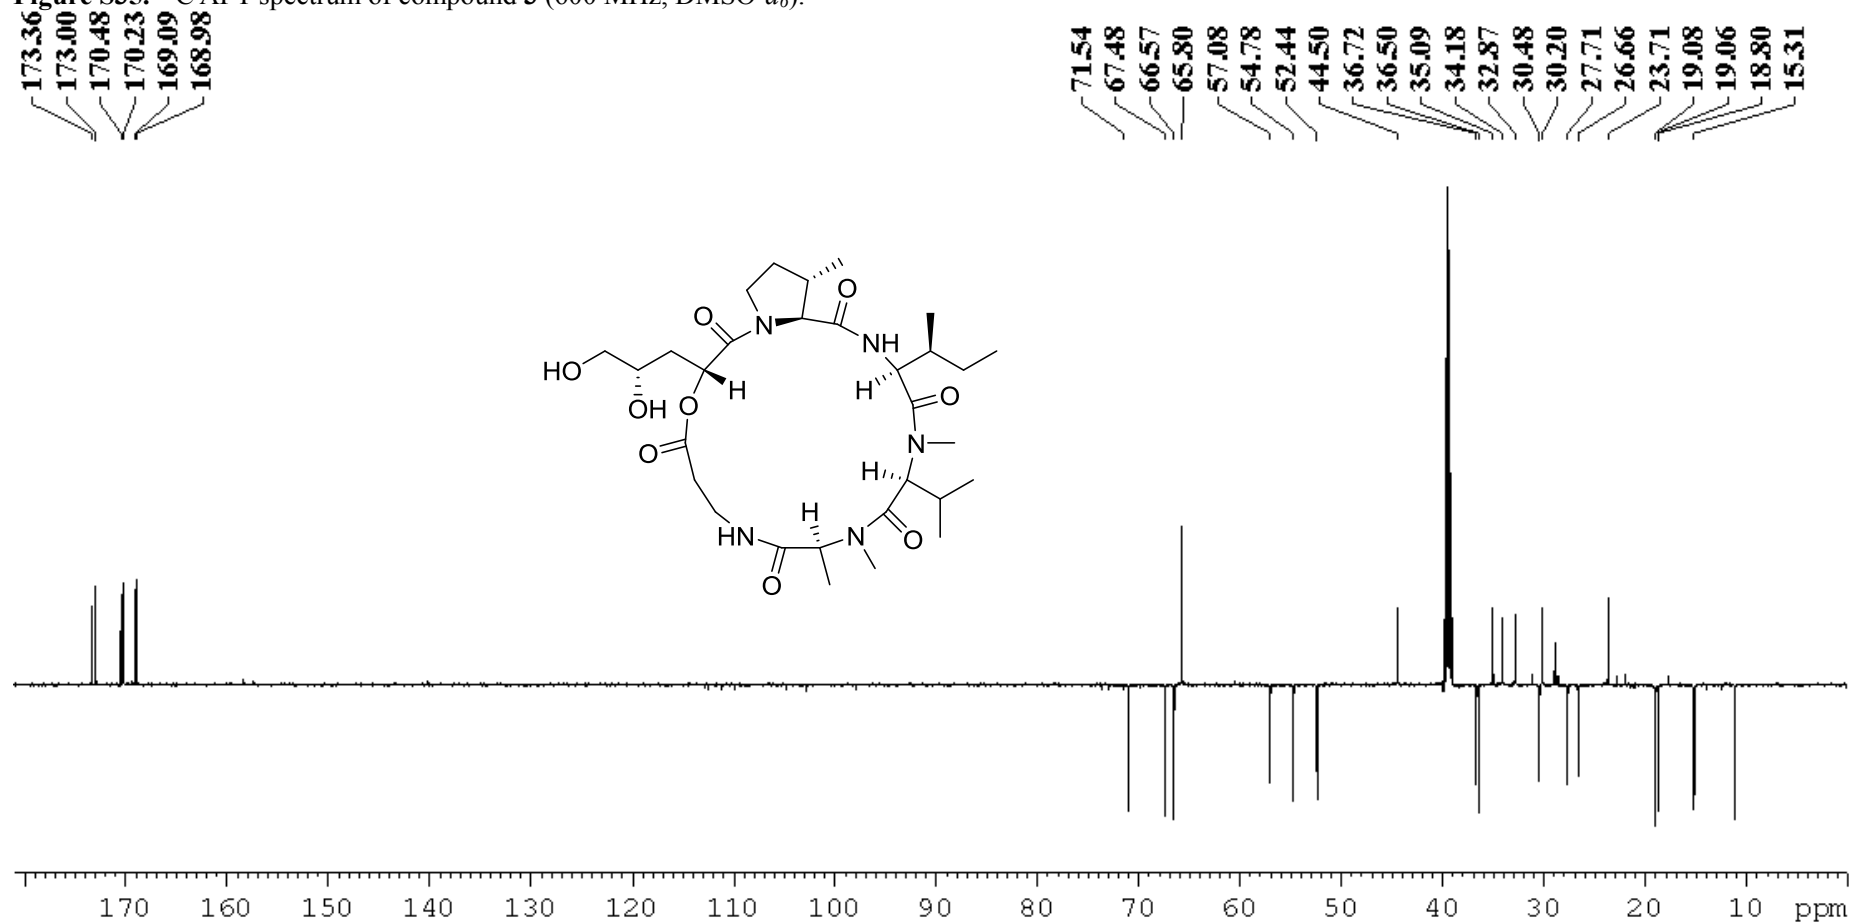

**Figure S36.**  $^1\text{H}$ - $^1\text{H}$  COSY spectrum of compound **3**.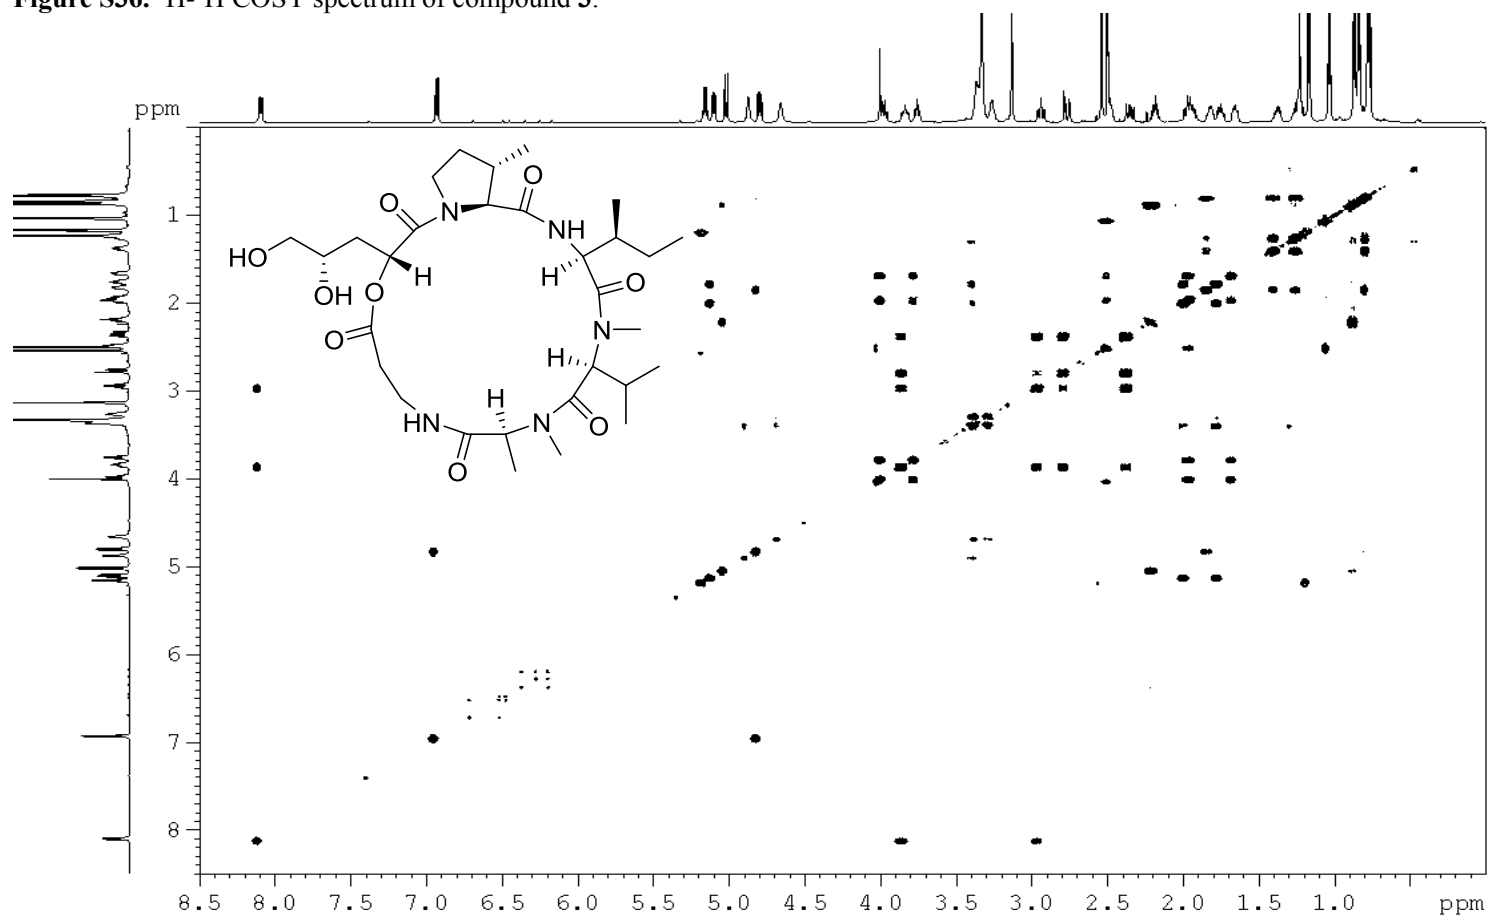

Figure S37. HSQC spectrum of compound 3.

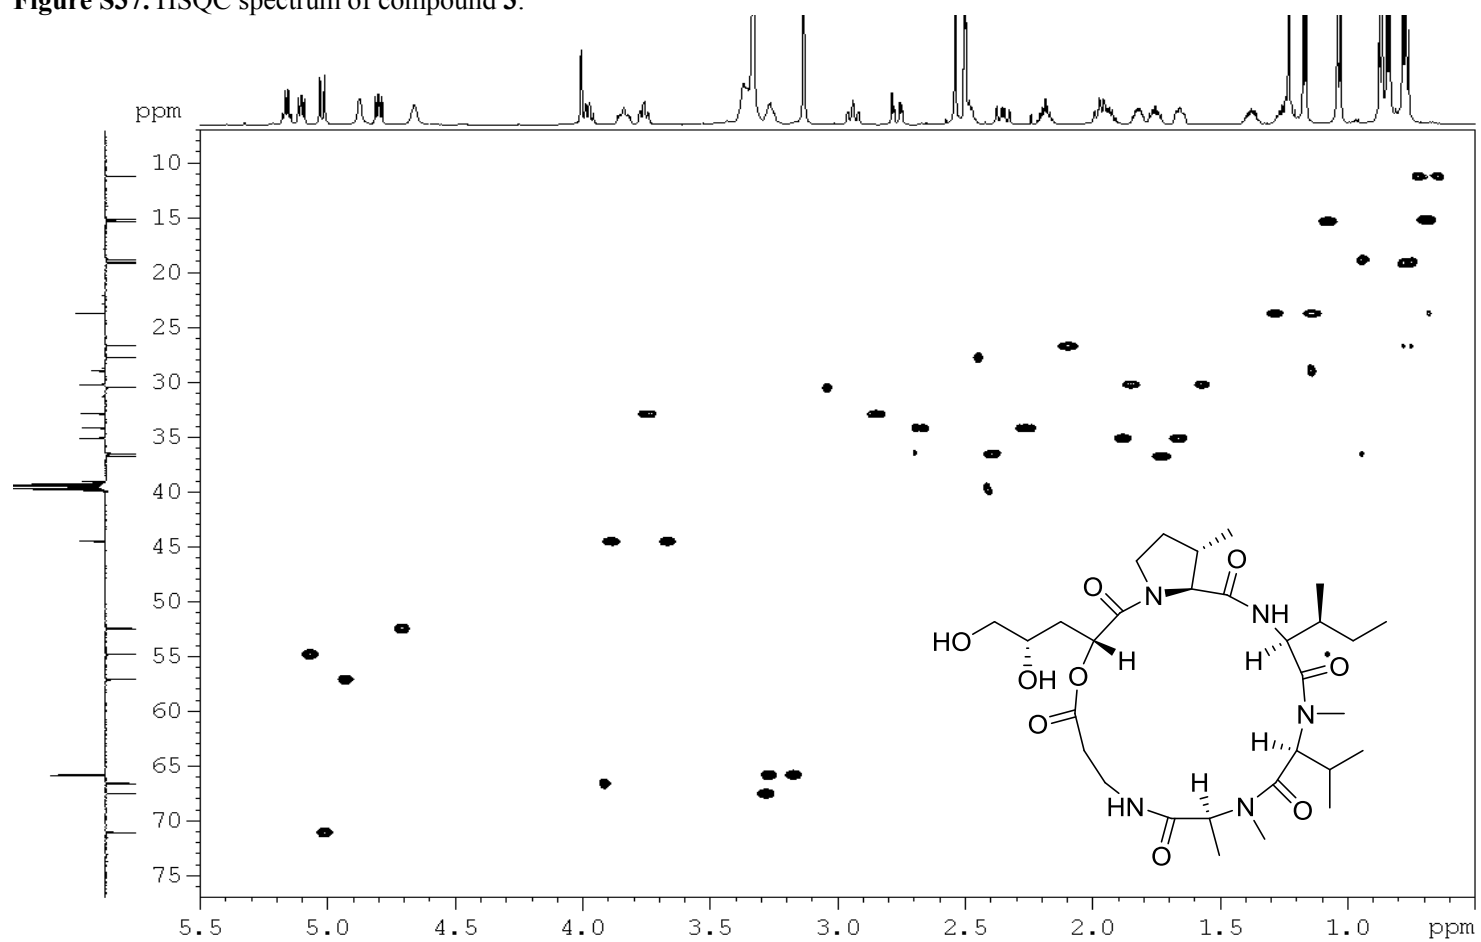



Figure S38. HMBC spectrum of compound 3.

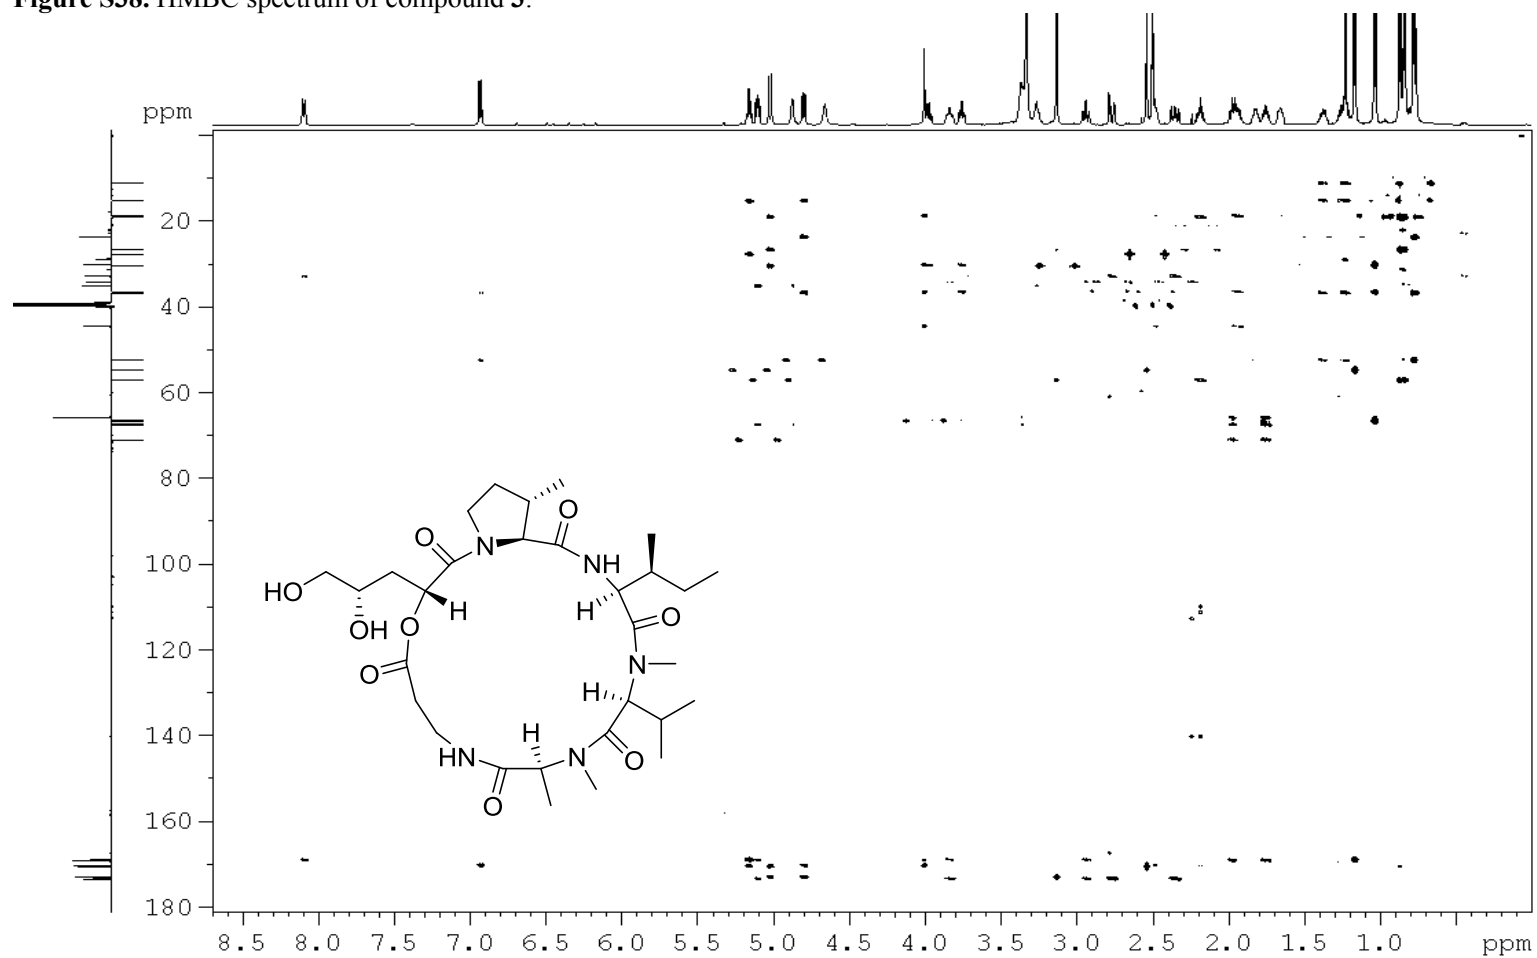

Figure S39. NOESY spectrum of compound 3.

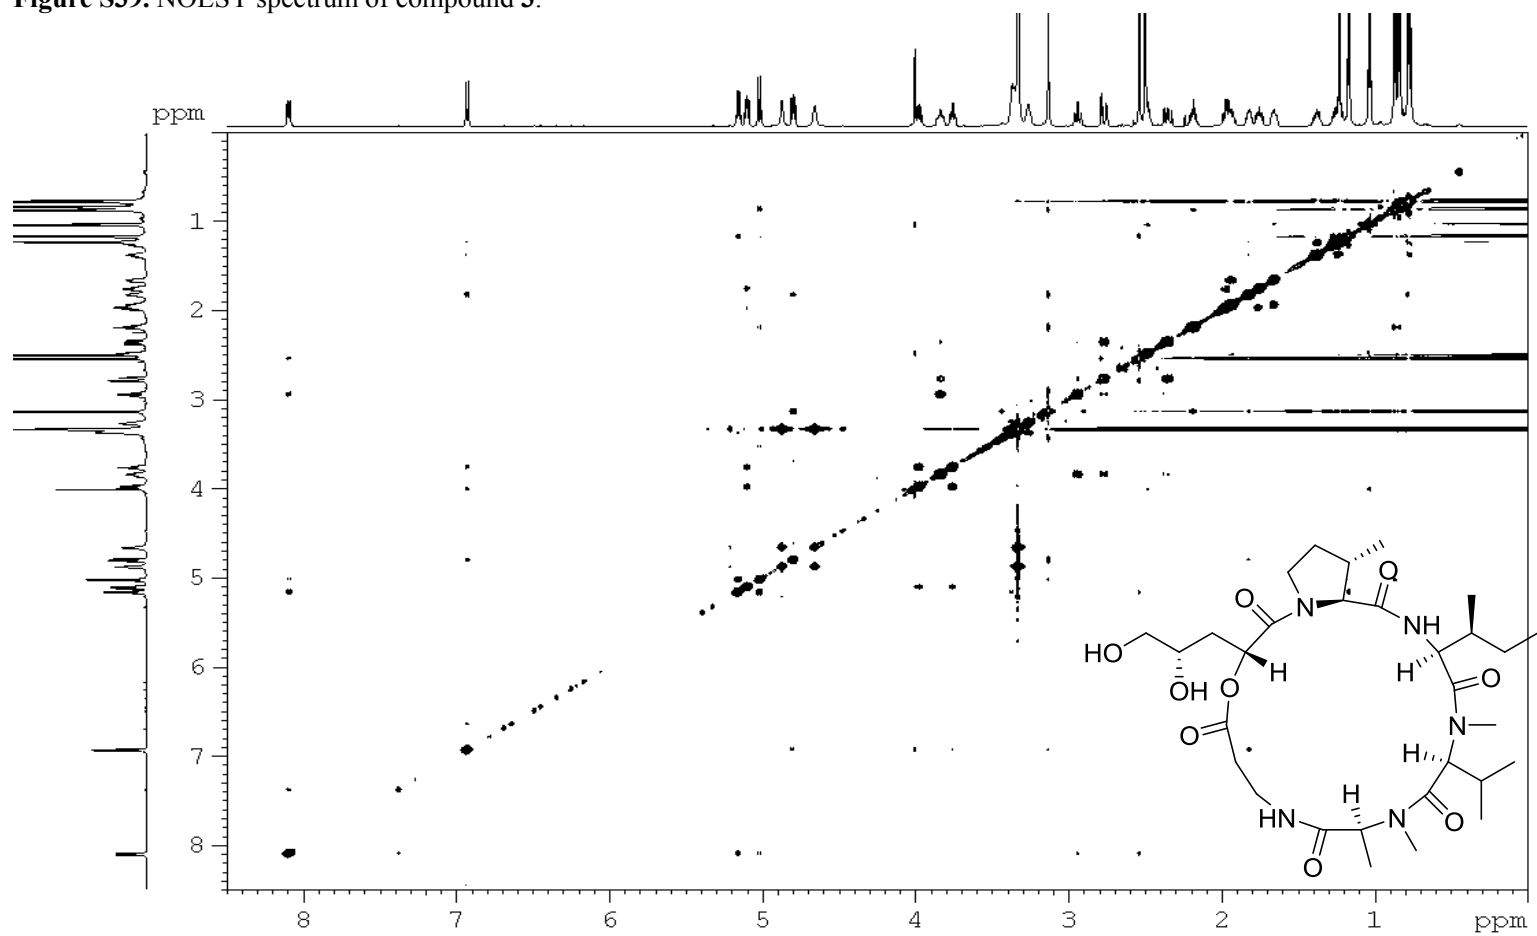

Figure S40. IR of compound 3.

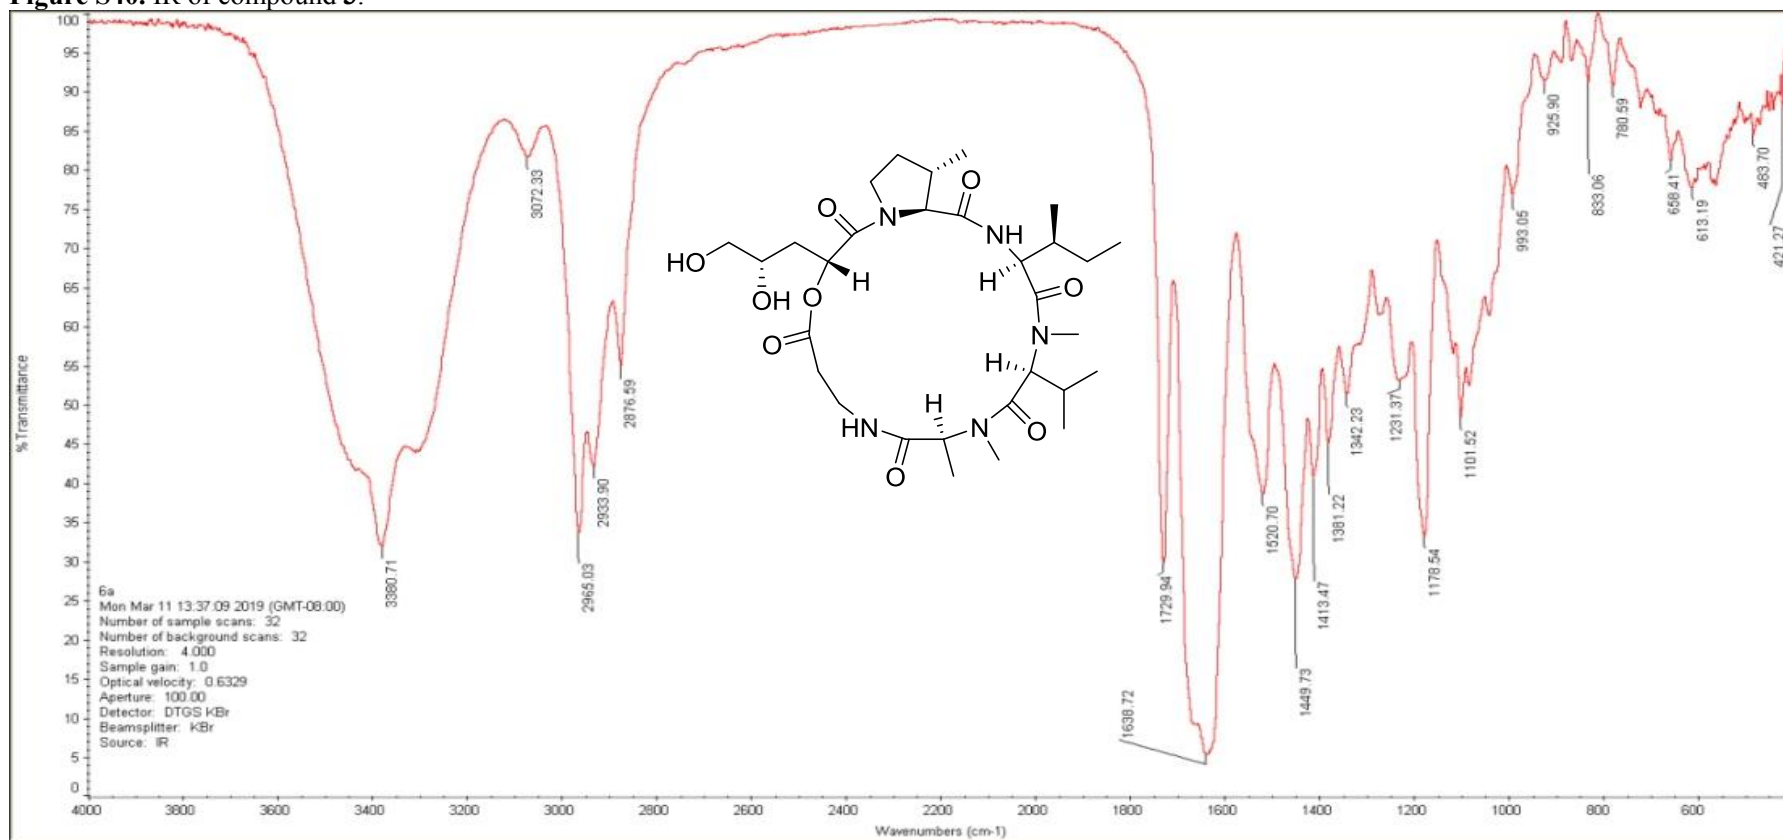

**Figure S41.** HRESIMS of compound **3**.

Xevo G2 Q-TOF/YCA166#

4-6-c HR 12 (0.233) Cm (10:17-(2:5+26:54))

26-Apr-2018

Waters

1: TOF MS ES+  
6.53e5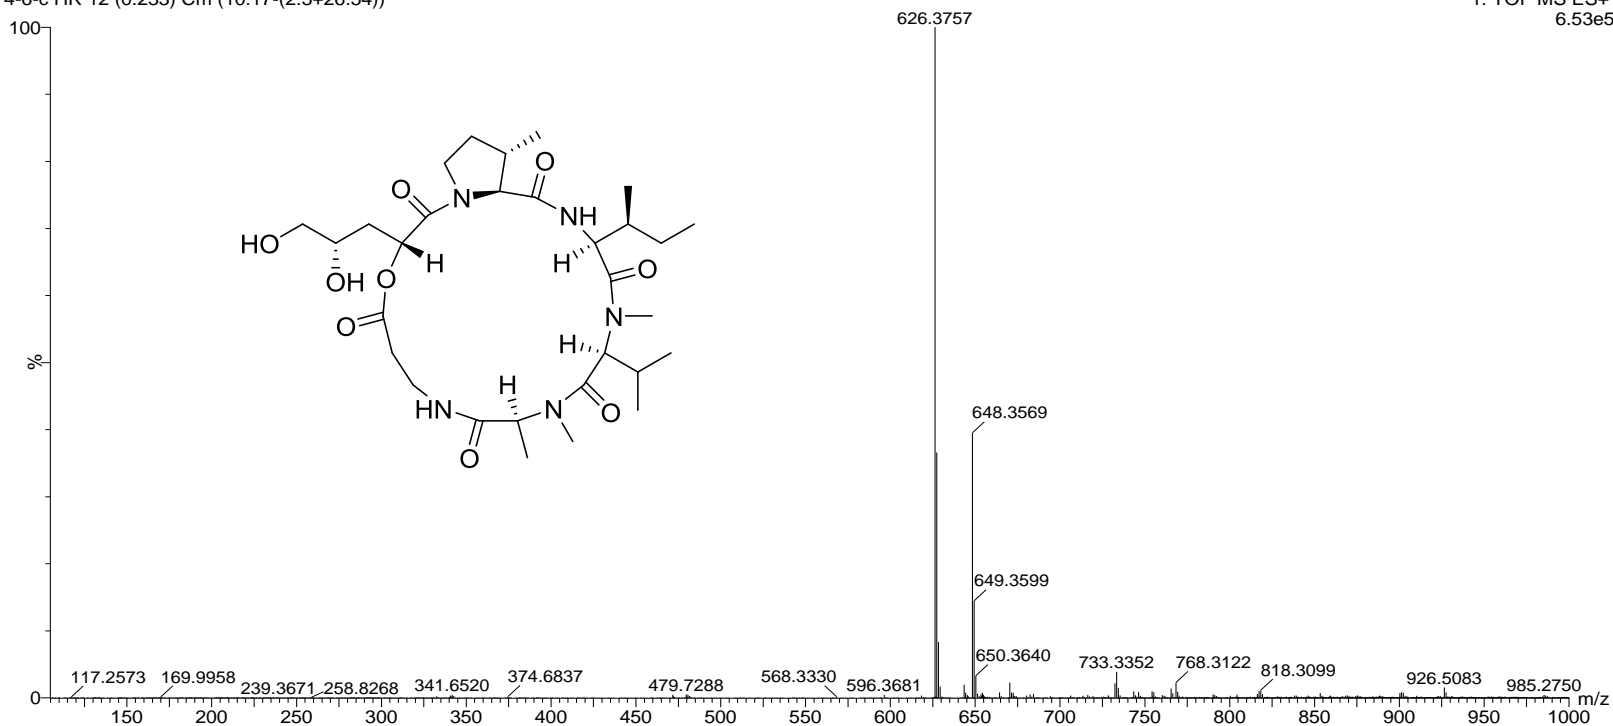

| Mass     | Calc. Mass | mDa  | PPM  | DBE | i-FIT | Norm  | Conf(%) | Formula                                                       |
|----------|------------|------|------|-----|-------|-------|---------|---------------------------------------------------------------|
| 626.3757 | 626.3765   | -0.8 | -1.3 | 7.5 | 188.3 | 0.296 | 74.37   | C <sub>30</sub> H <sub>52</sub> N <sub>5</sub> O <sub>9</sub> |

**Figure S42.**  $^1\text{H}$  NMR spectrum of compound **4** (600 MHz,  $\text{DMSO-}d_6$ ).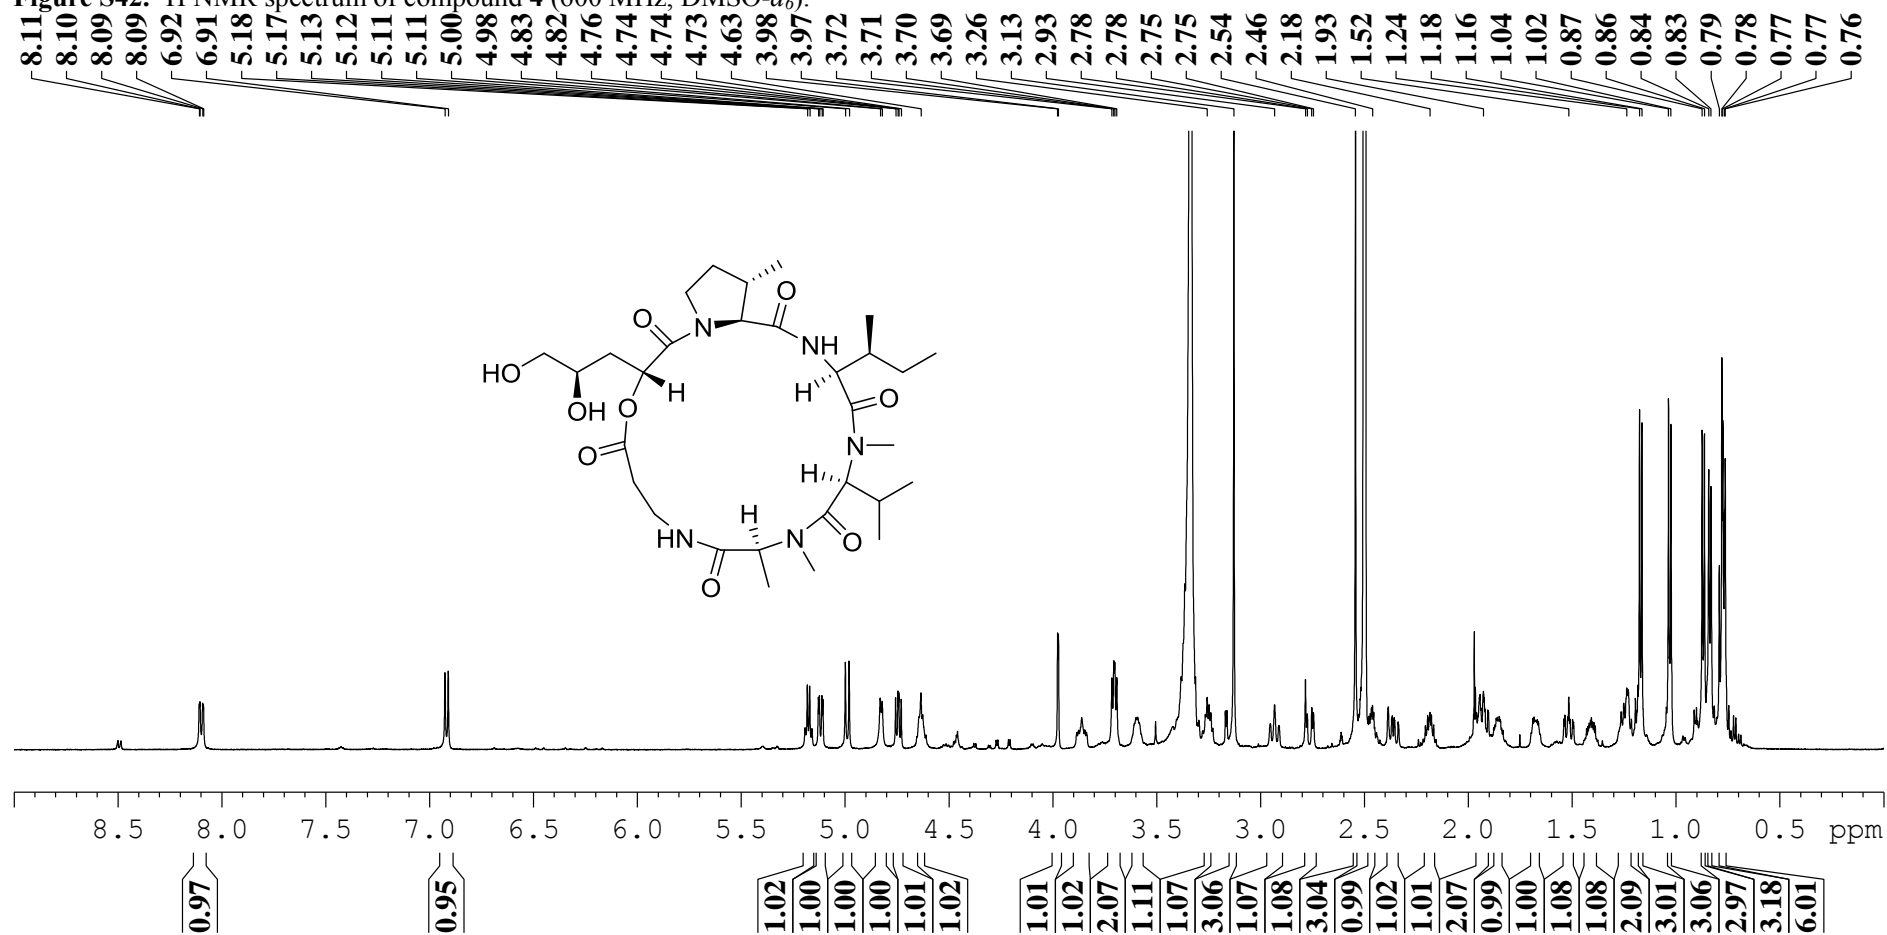

**Figure S43.**  $^{13}\text{C}$  APT spectrum of compound **4** (600 MHz,  $\text{DMSO-}d_6$ ).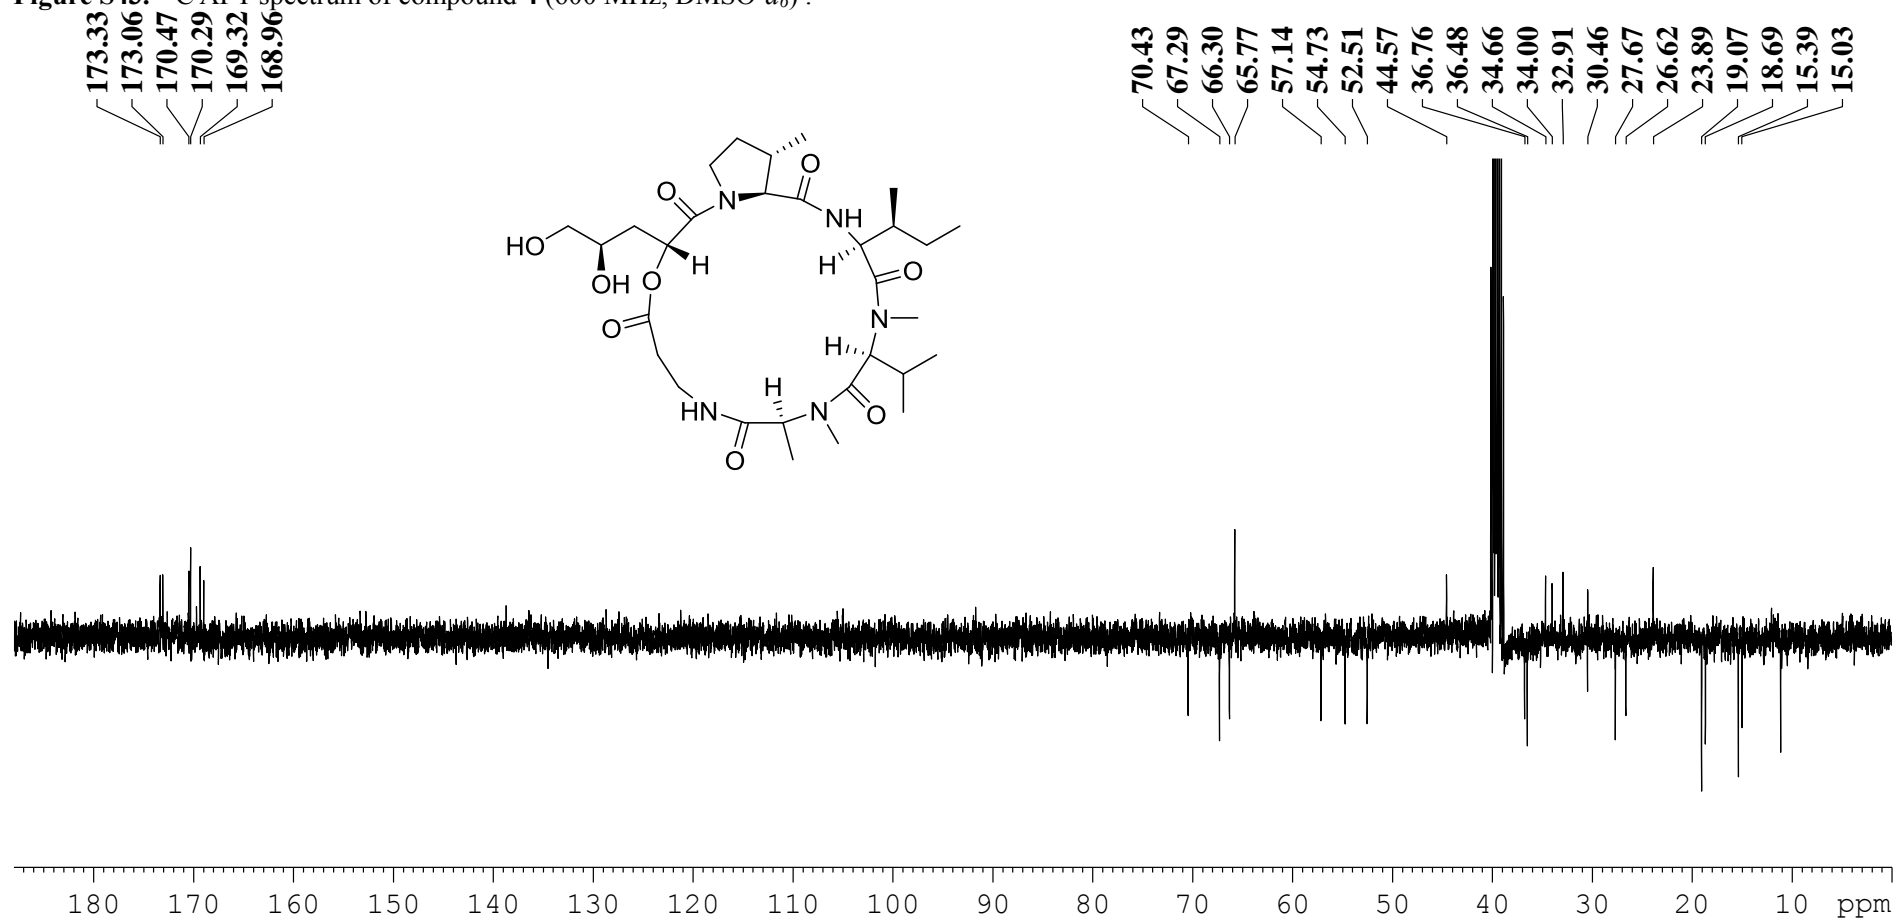

Figure S44.  $^1\text{H}$ - $^1\text{H}$  COSY spectrum of compound 4.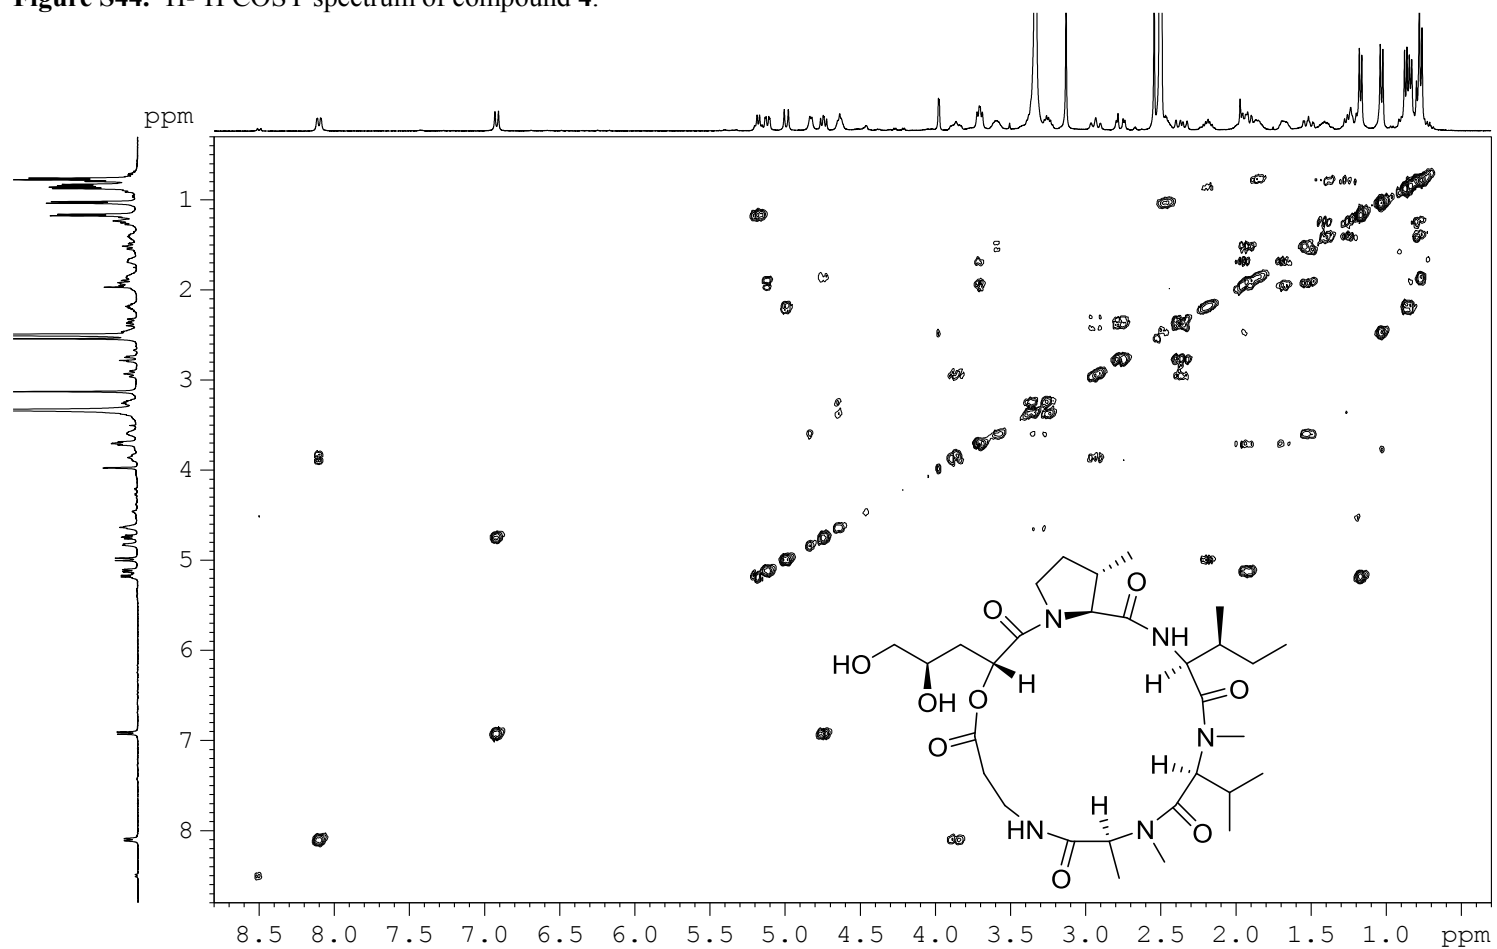

Figure S45. HSQC spectrum of compound 4.

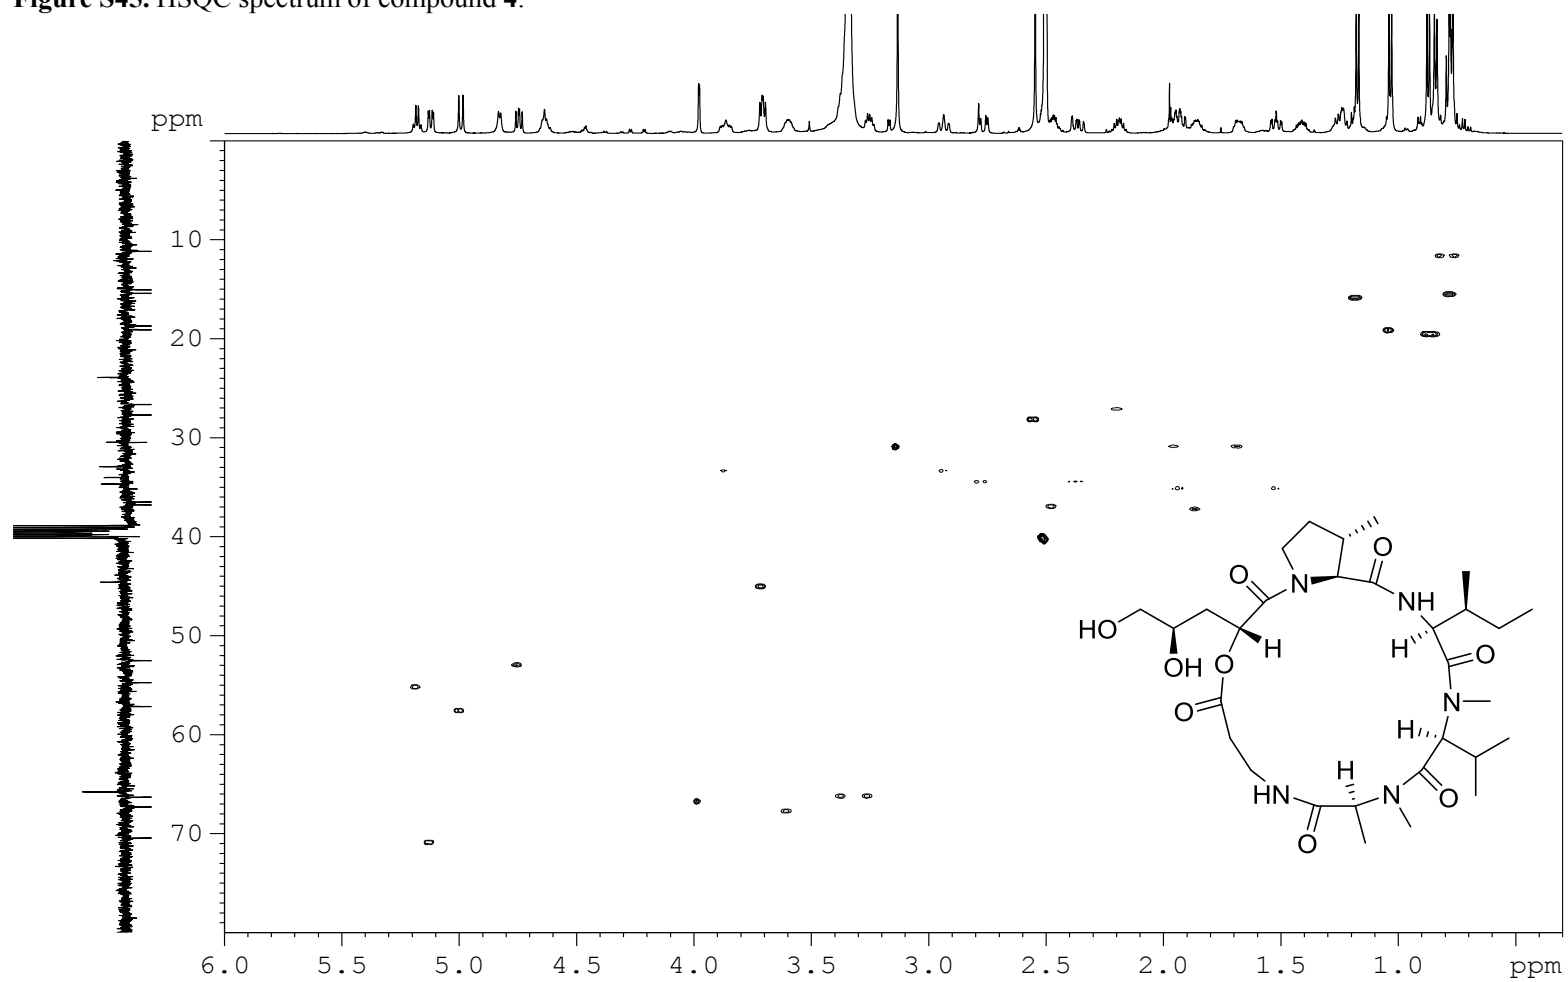



Figure S46. HMBC spectrum of compound 4.

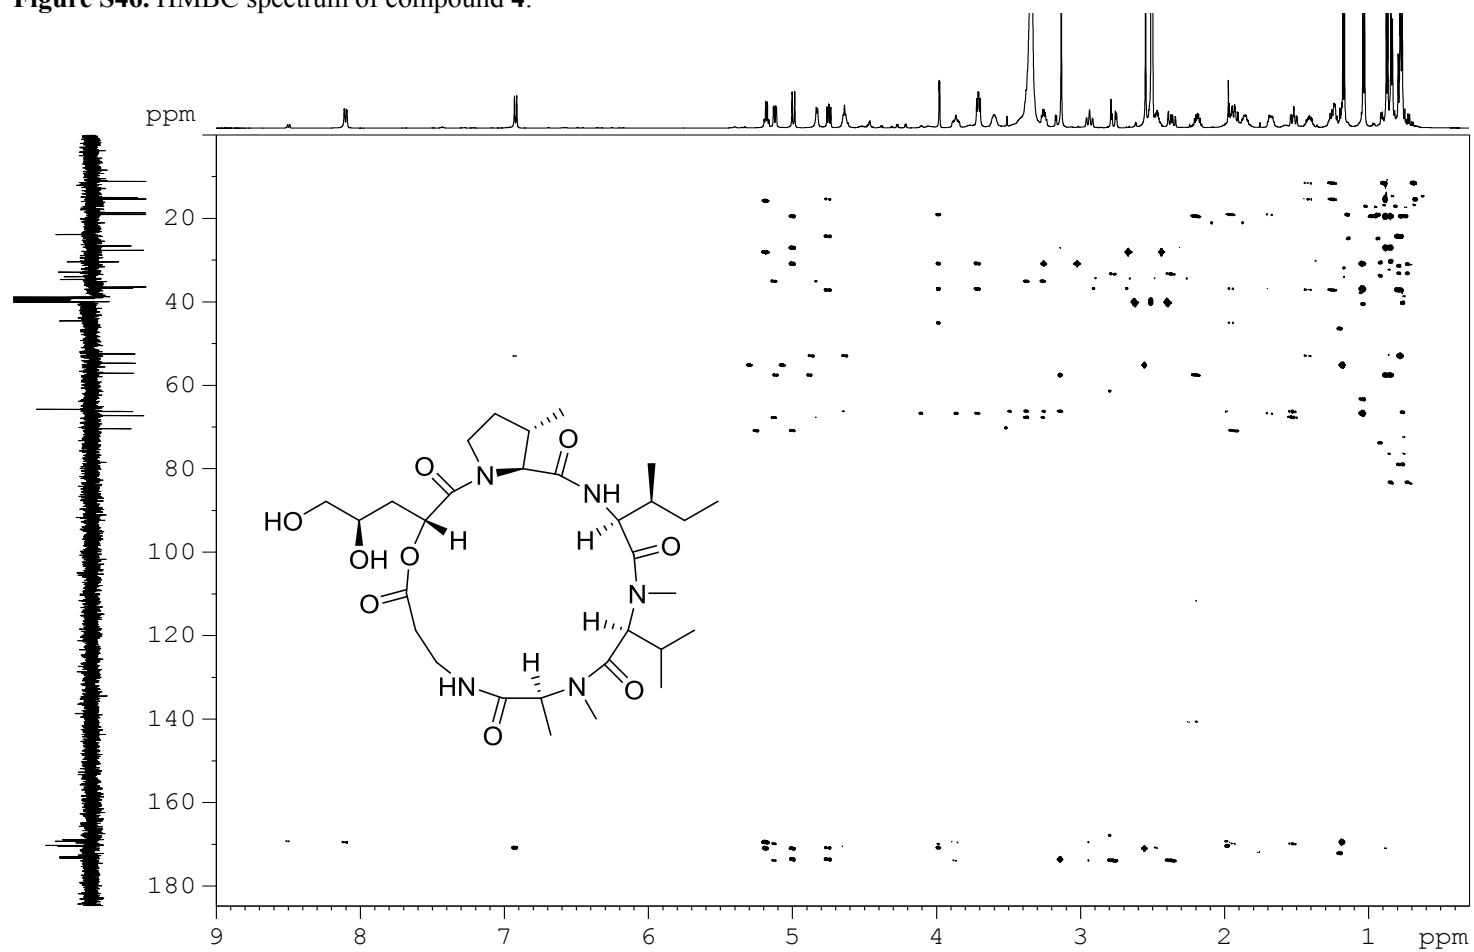

Figure S47. IR of compound 4.

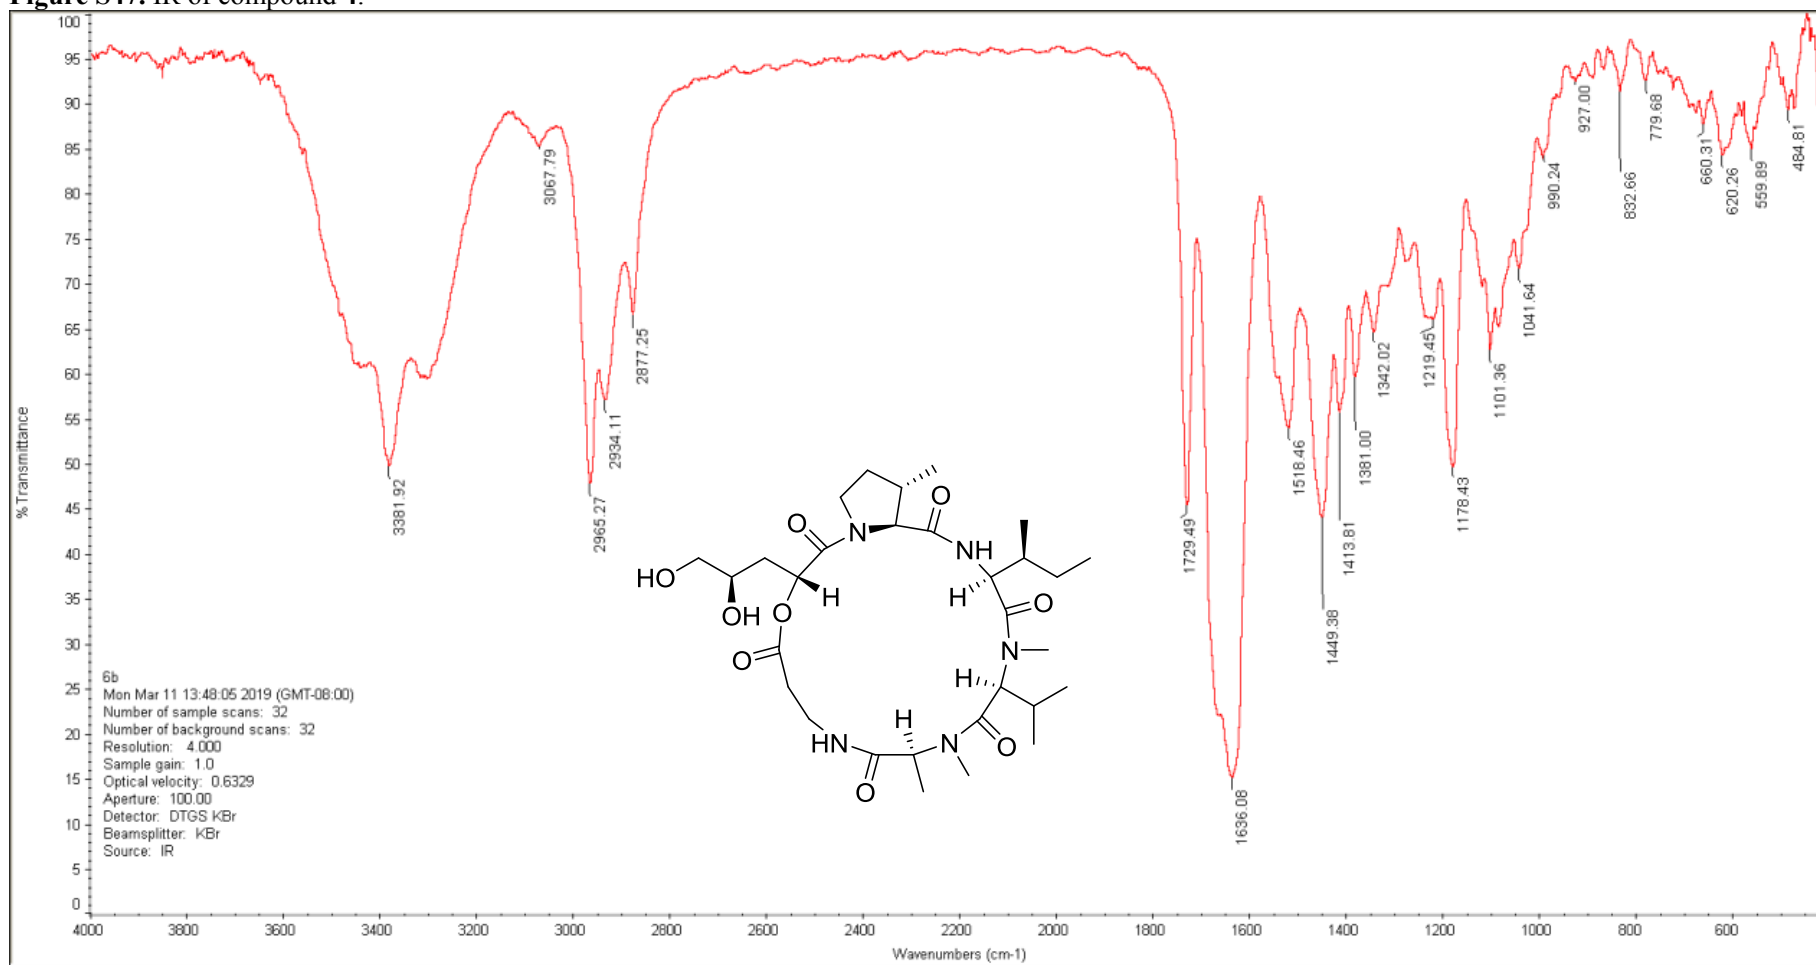

**Figure S48.** HRESIMS of compound 4.

Xevo G2 Q-TOF/YCA166#

14-3-1 POS 14 (0.267) Cm (14:17-(4:11+35:46))

12-Mar-2019

Waters

1: TOF MS ES+

7.95e4

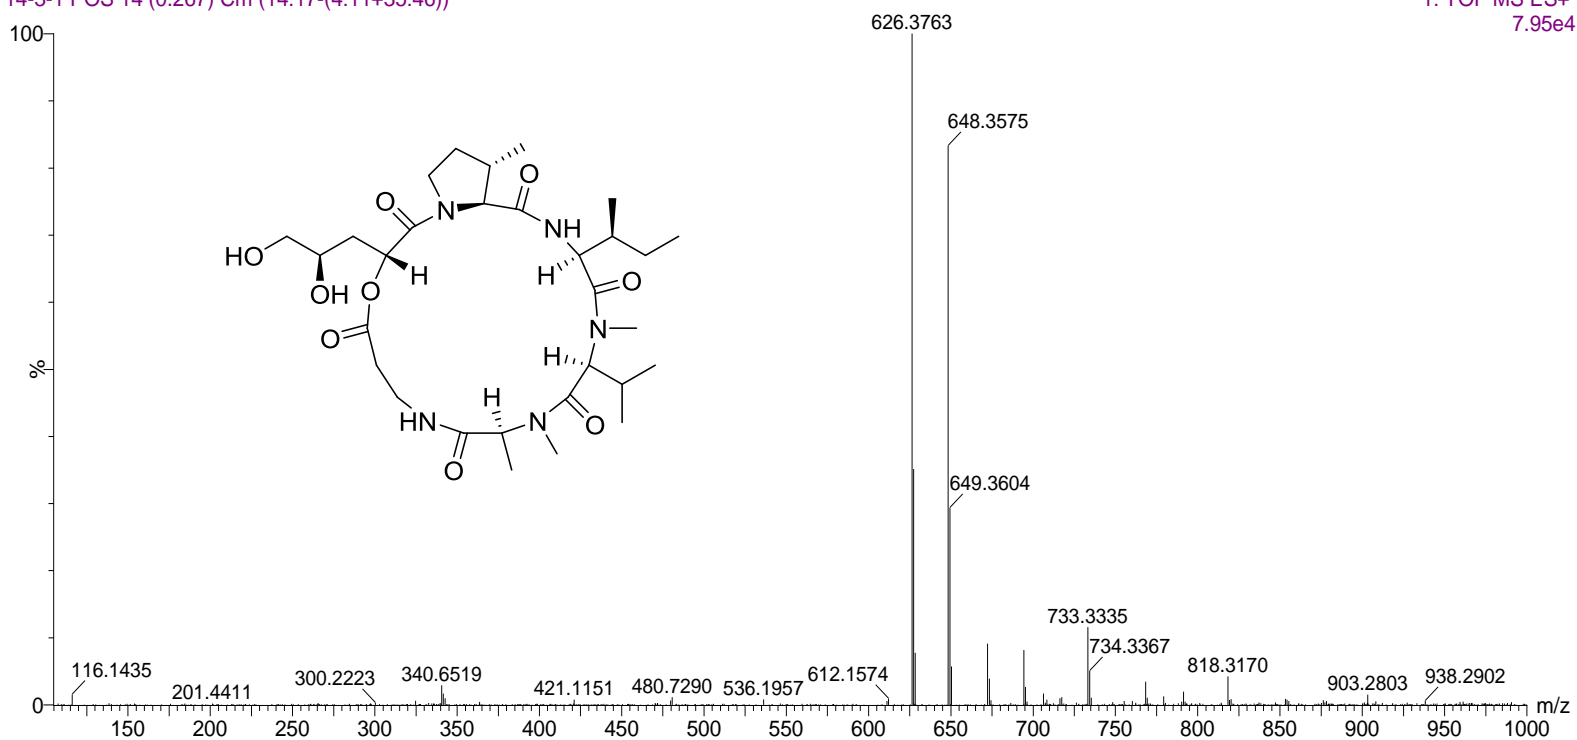

| Mass     | Calc. Mass | mDa  | PPM  | DBE | i-FIT | Norm  | Conf(%) | Formula                                                       |
|----------|------------|------|------|-----|-------|-------|---------|---------------------------------------------------------------|
| 626.3763 | 626.3765   | -0.2 | -0.3 | 7.5 | 37.1  | 0.002 | 99.77   | C <sub>30</sub> H <sub>52</sub> N <sub>5</sub> O <sub>9</sub> |

Figure S49.  $^1\text{H}$  NMR spectrum of compound 5 (600 MHz,  $\text{DMSO-}d_6$ ).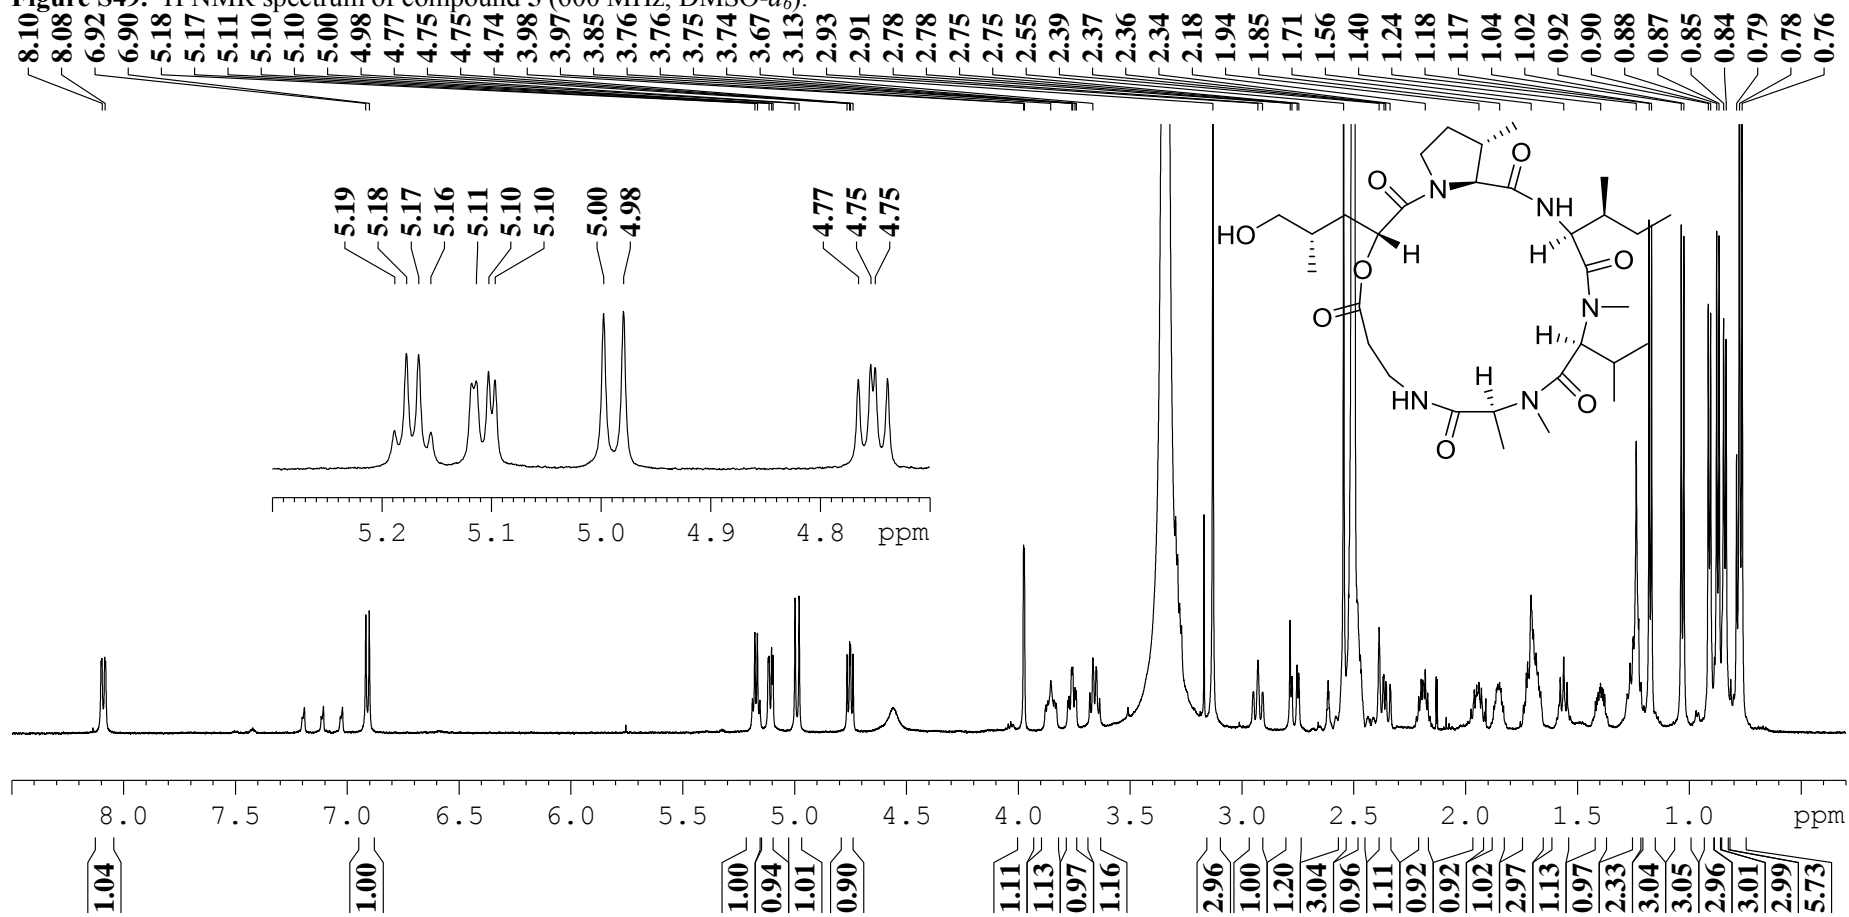

**Figure S50.**  $^{13}\text{C}$  APT spectrum of compound **5** (600 MHz,  $\text{DMSO-}d_6$ ).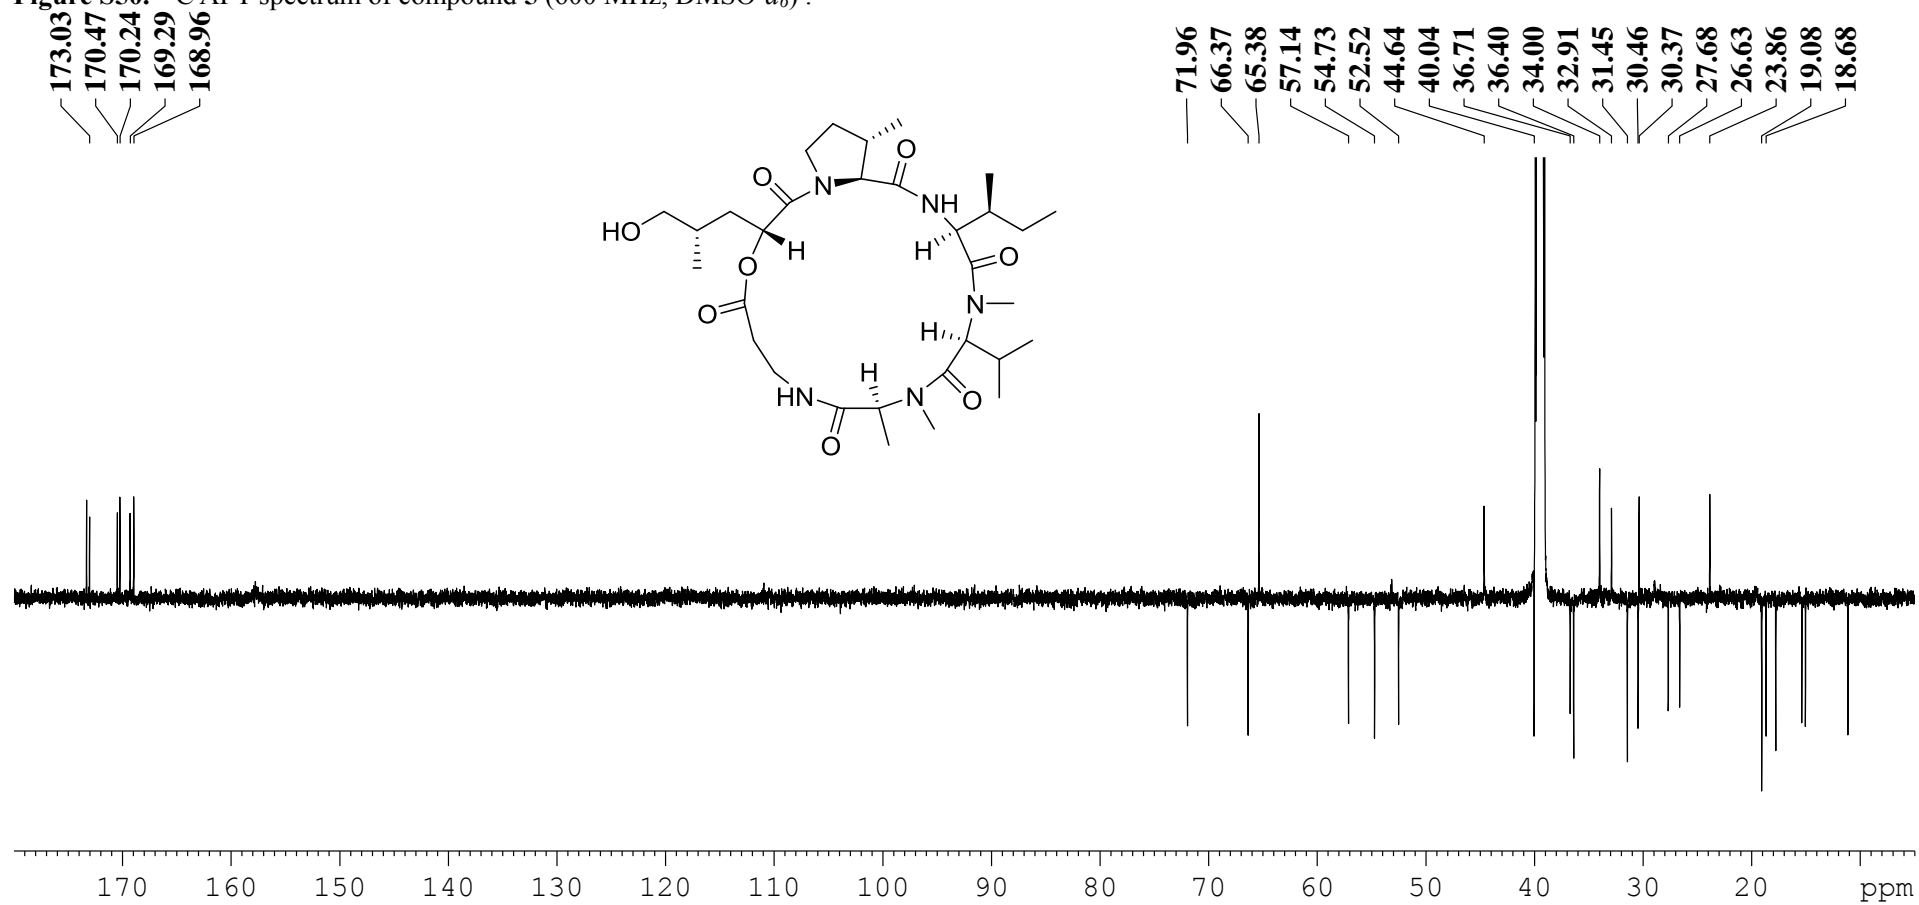

Figure S51.  $^1\text{H}$ - $^1\text{H}$  COSY spectrum of compound 5.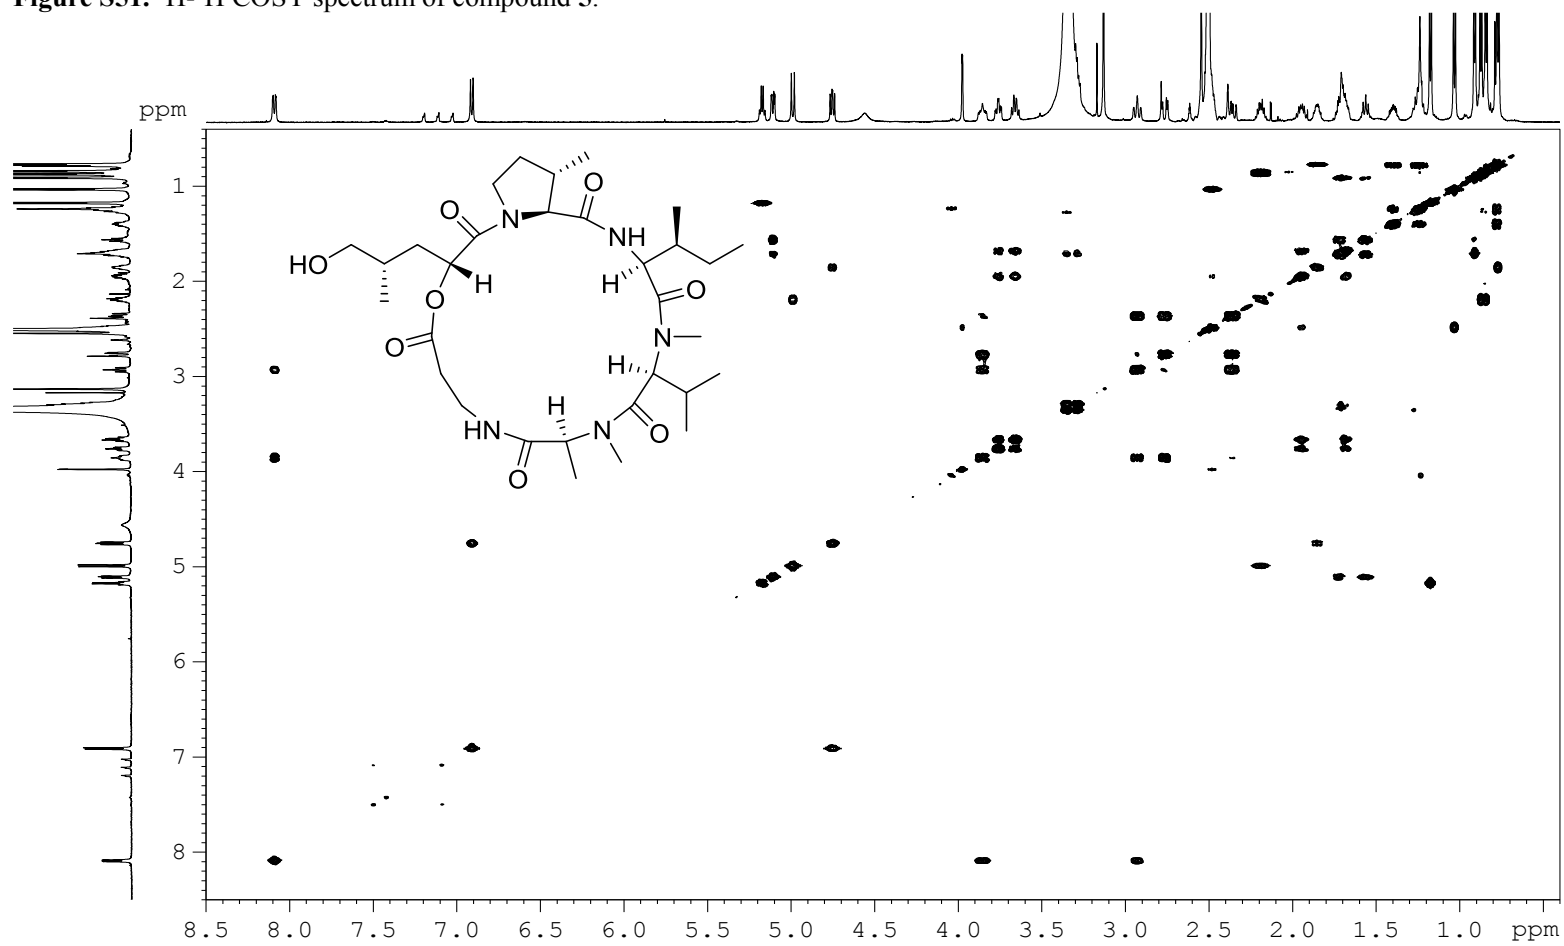



Figure S53. HMBC spectrum of compound 5.

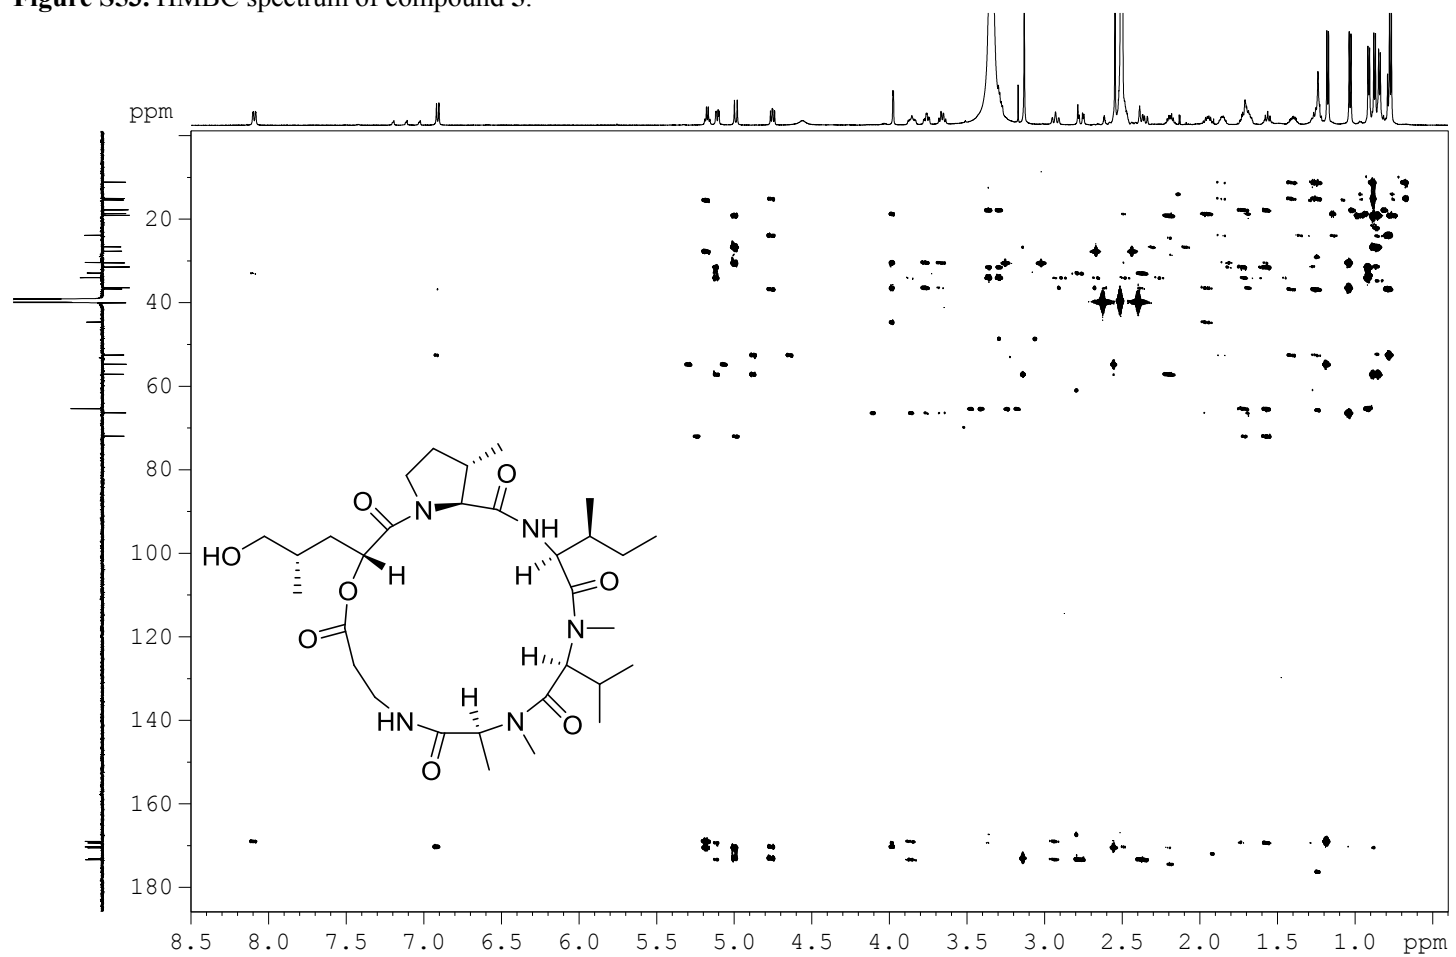



Figure S54. IR of compound 5.

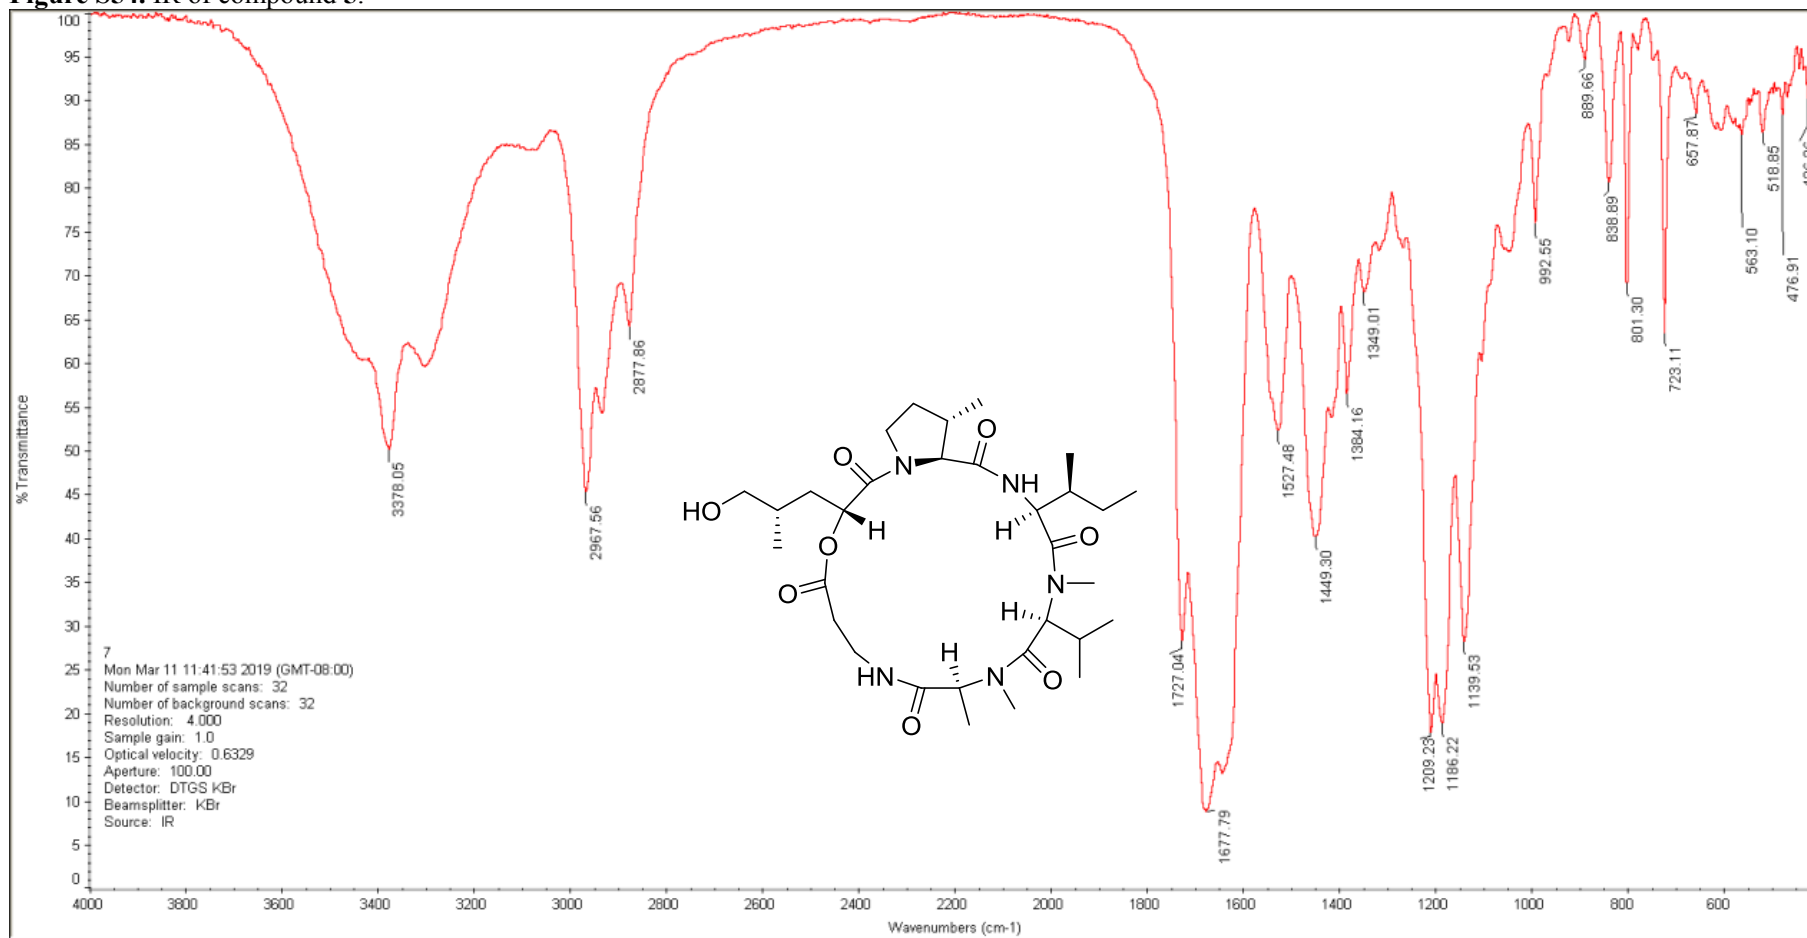

**Figure S55.** HRESIMS of compound **5**.

Xevo G2 Q-TOF/YCA166#

4-6-f-a-3 HR POS 12 (0.233) Cm (11:17-(1:5+24:31))

26-Apr-2018

Waters

1: TOF MS ES+  
3.96e5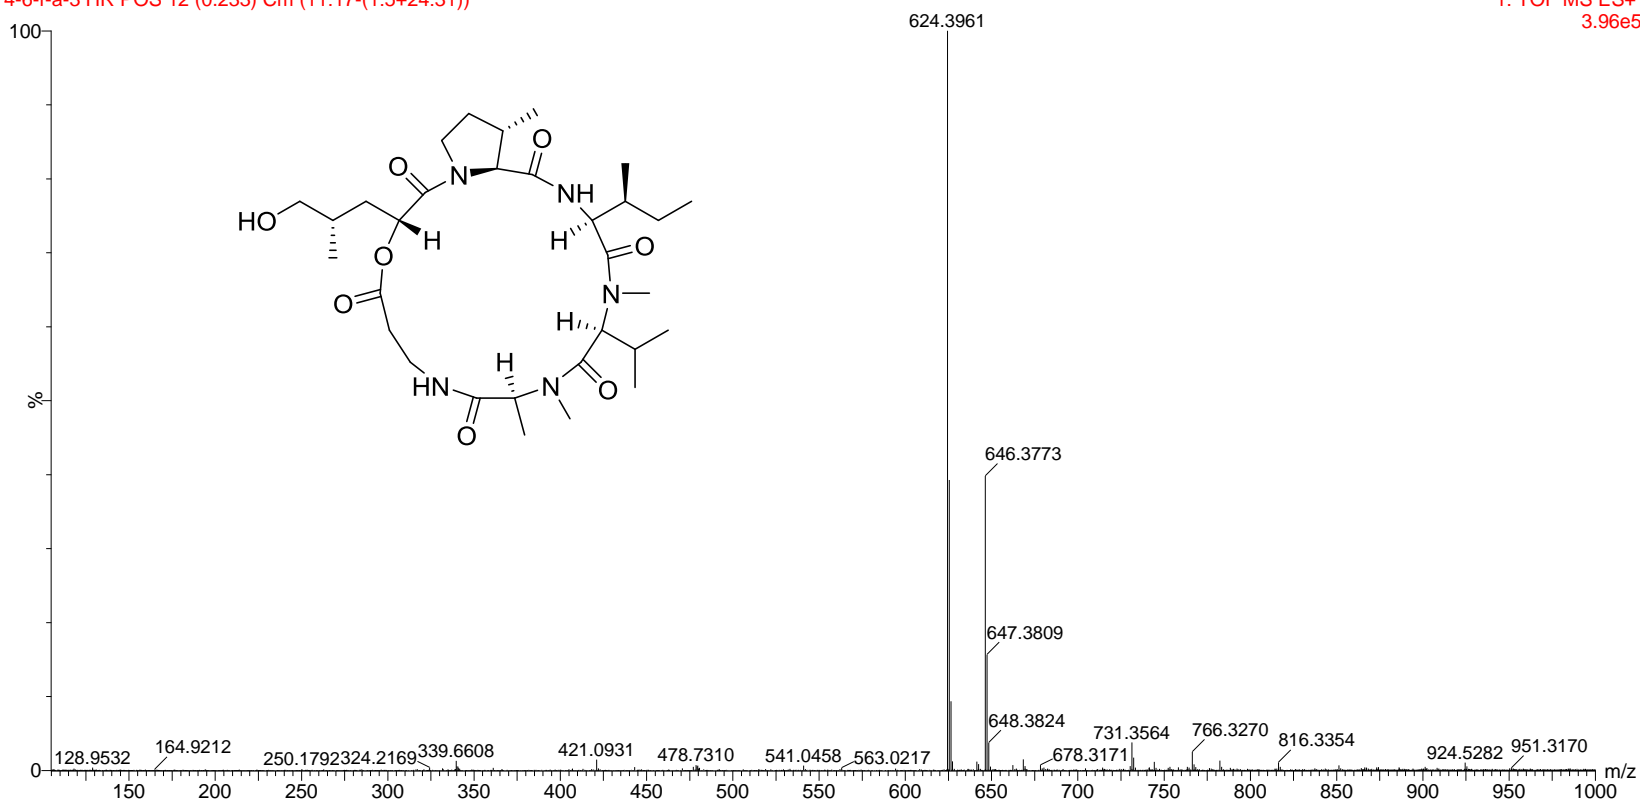

| Mass     | Calc.Mass | mDa  | PPM  | DBE | i-FIT | Norm  | Conf(%) | Formula                                                       |
|----------|-----------|------|------|-----|-------|-------|---------|---------------------------------------------------------------|
| 626.3763 | 624.3972  | -1.1 | -1.8 | 7.5 | 239.6 | 1.011 | 46.38   | C <sub>31</sub> H <sub>54</sub> N <sub>5</sub> O <sub>8</sub> |

**Figure S56.**  $^1\text{H}$  NMR spectrum of **6** (600 MHz,  $\text{DMSO-}d_6$ ).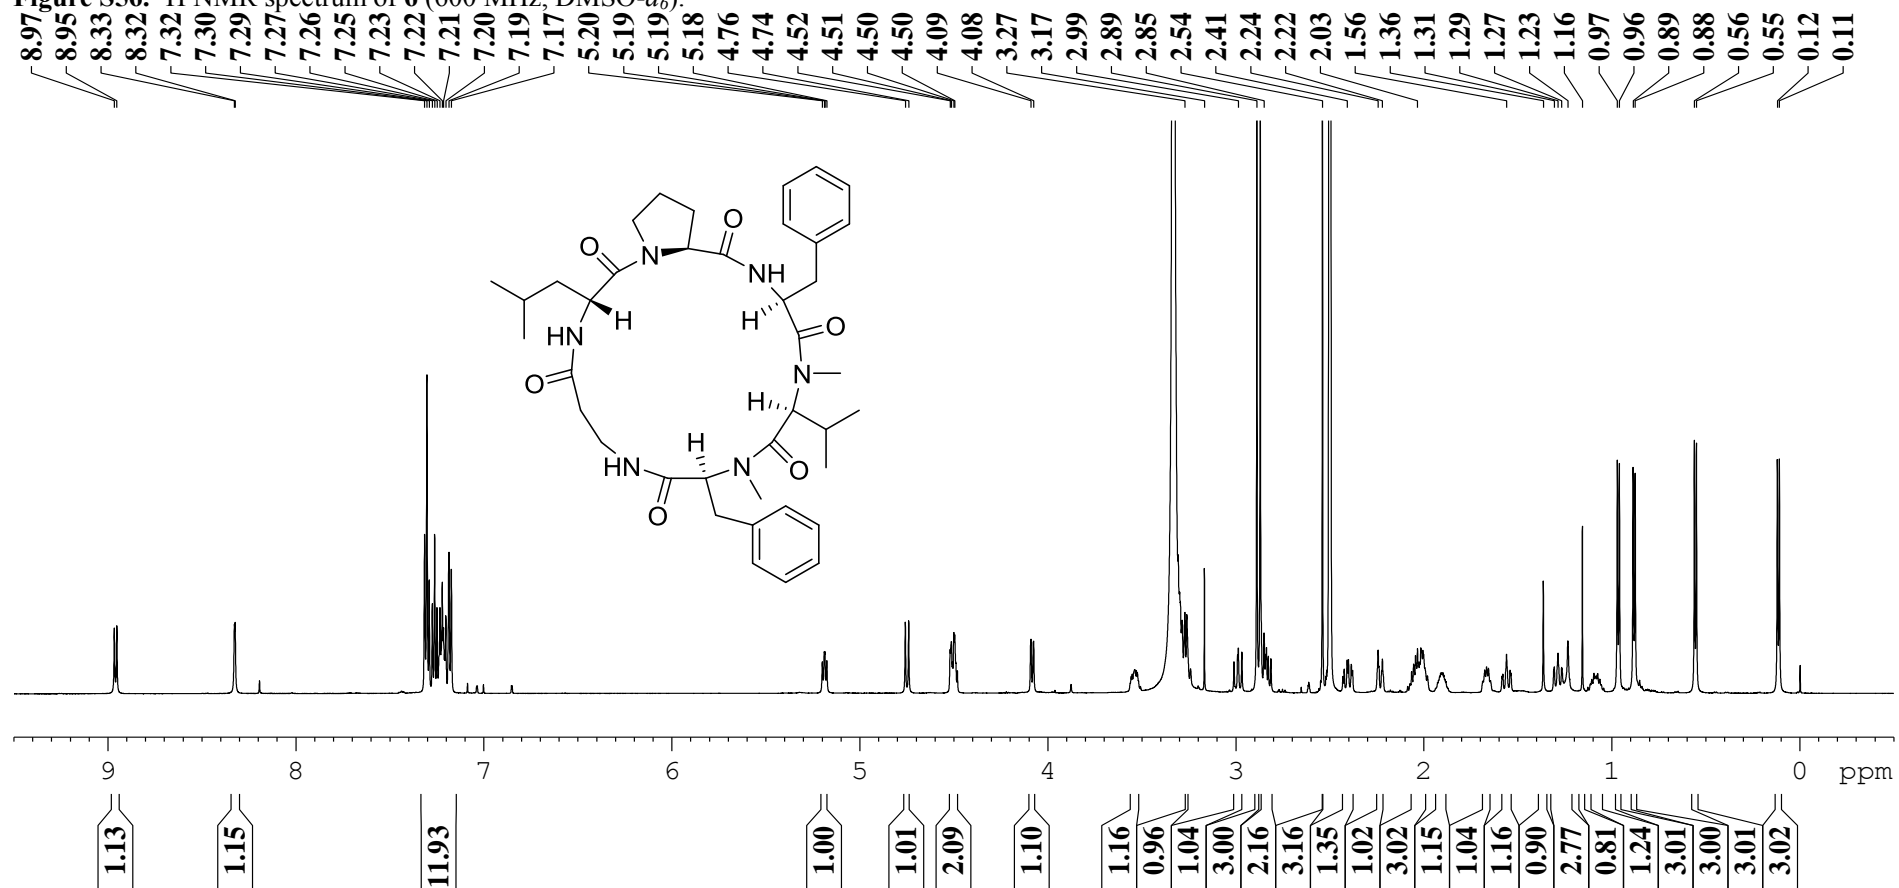

**Figure S57.**  $^{13}\text{C}$  APT spectrum of **6** (600 MHz,  $\text{DMSO-}d_6$ ).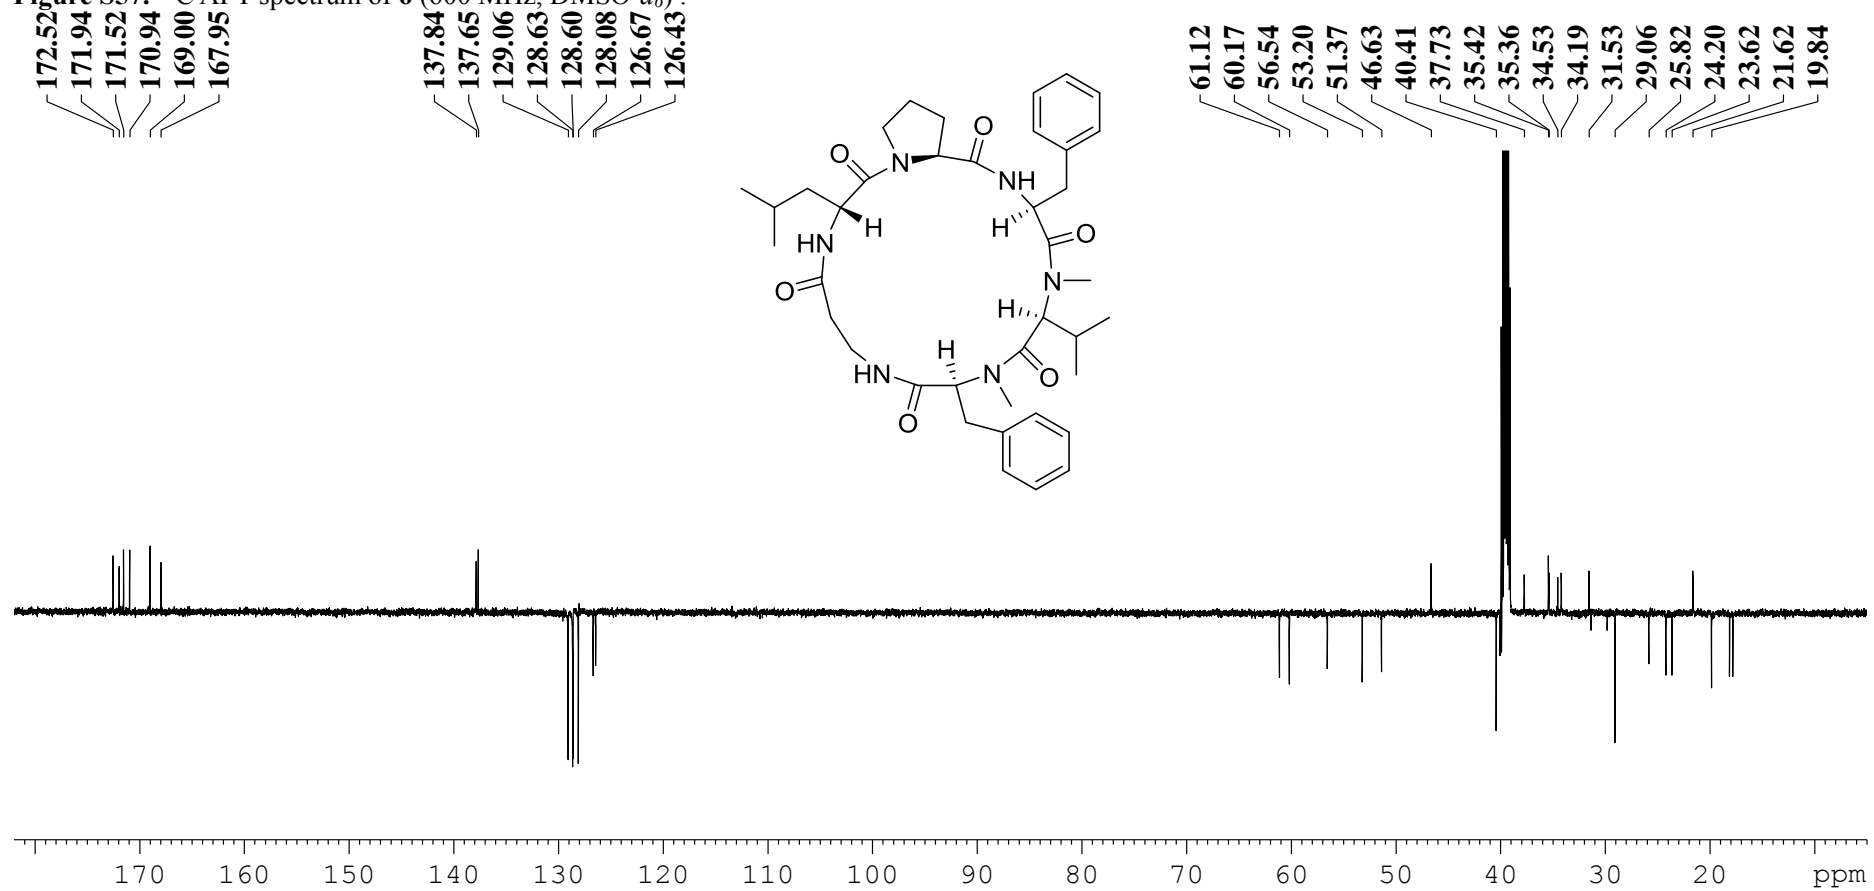

Figure S58.  $^1\text{H}$ - $^1\text{H}$  COSY spectrum of **6**.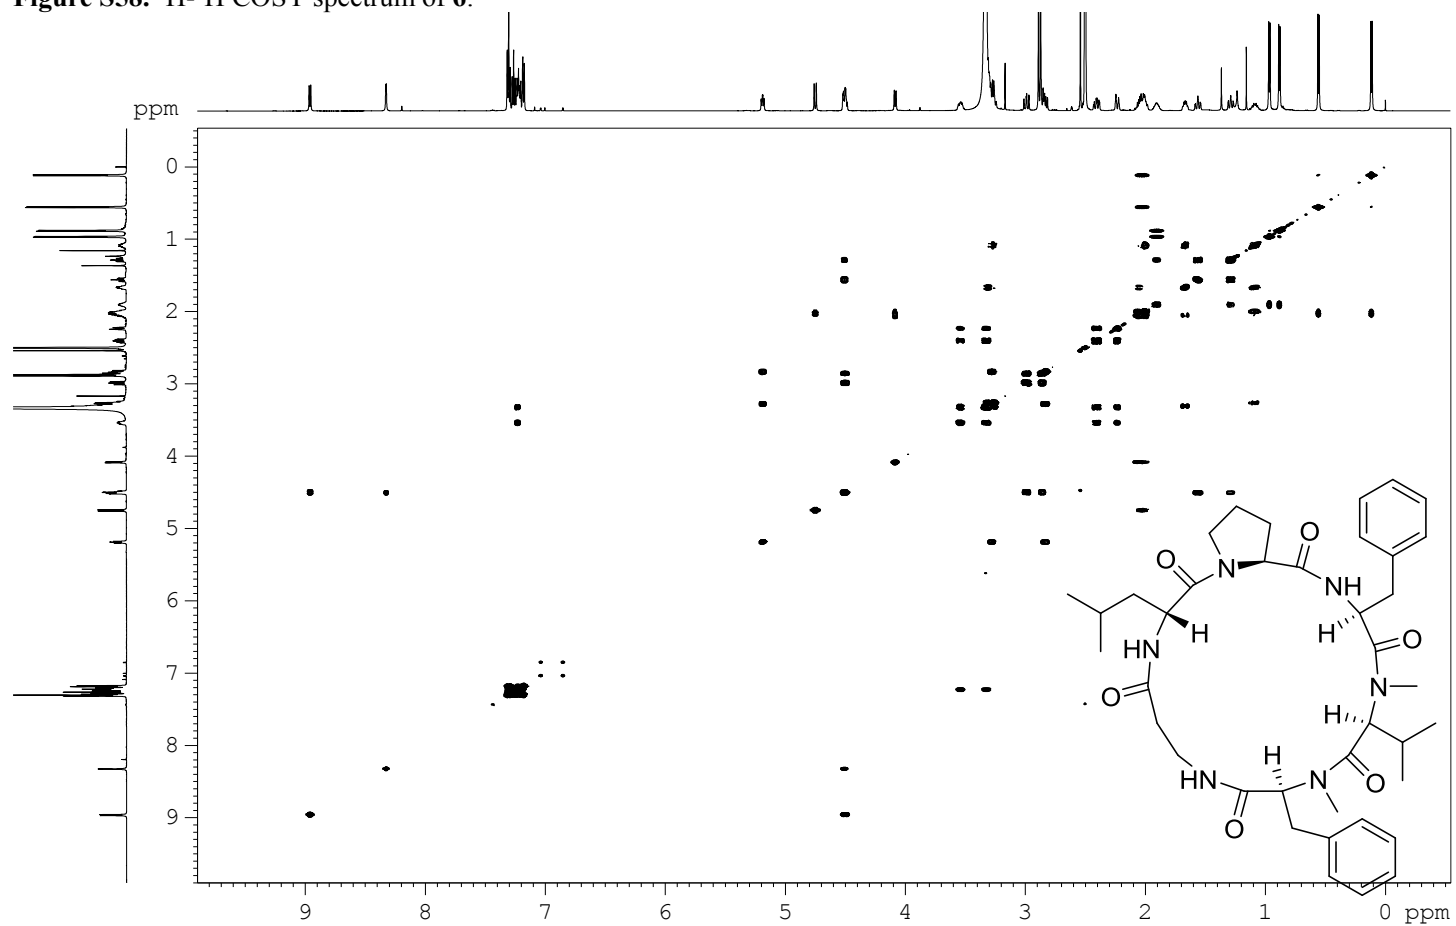

Figure S59. HSQC spectrum of **6**.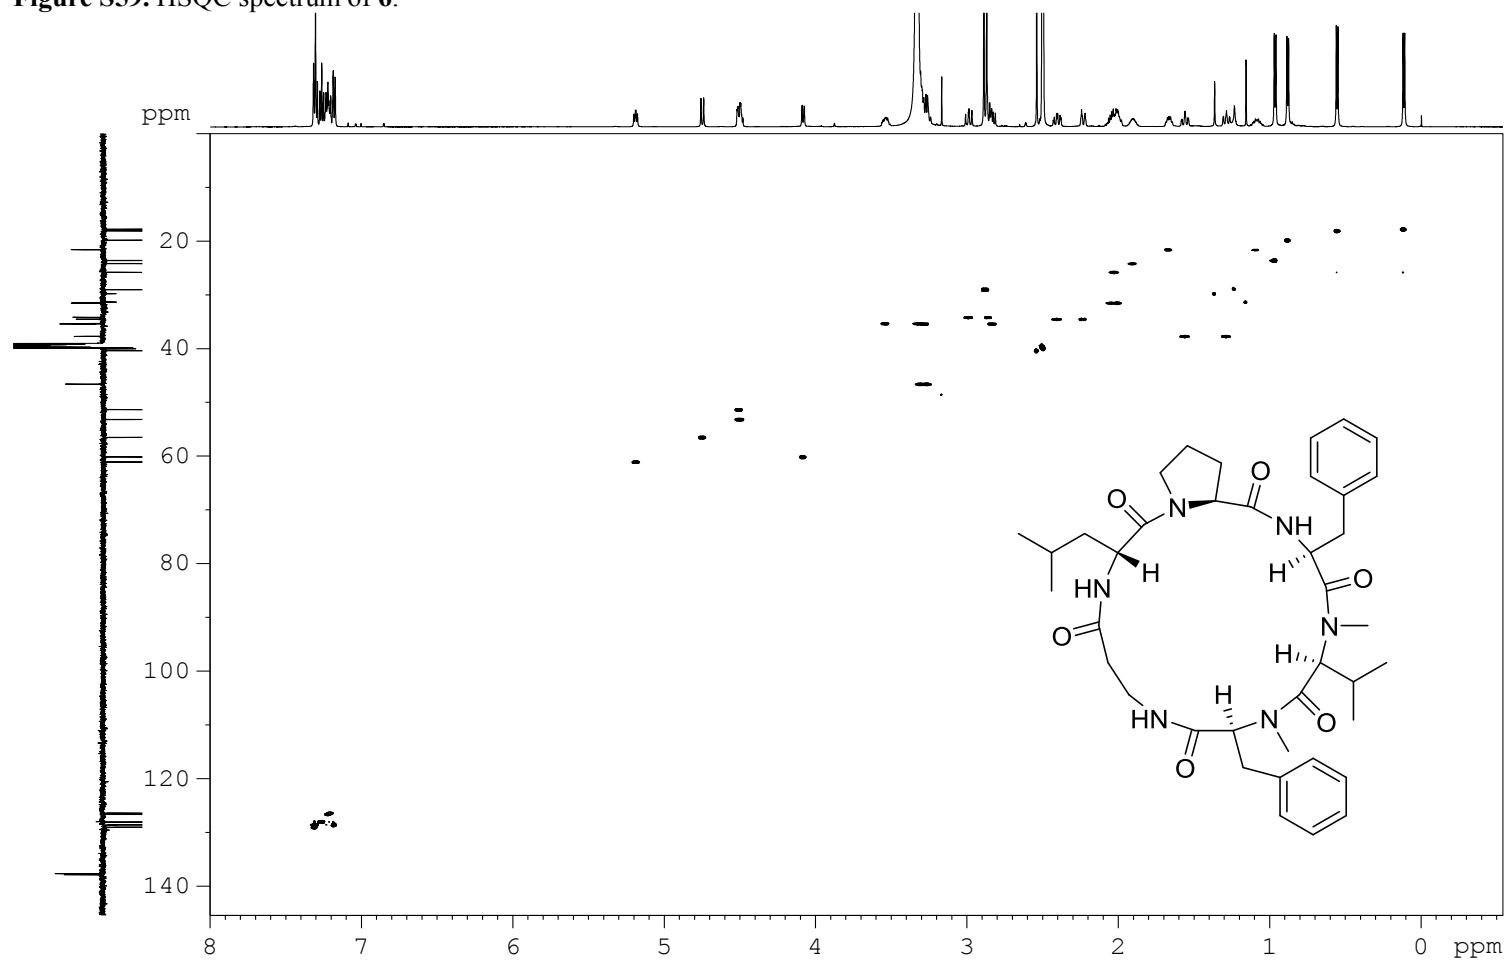

Figure S60. HMBC spectrum of 6.

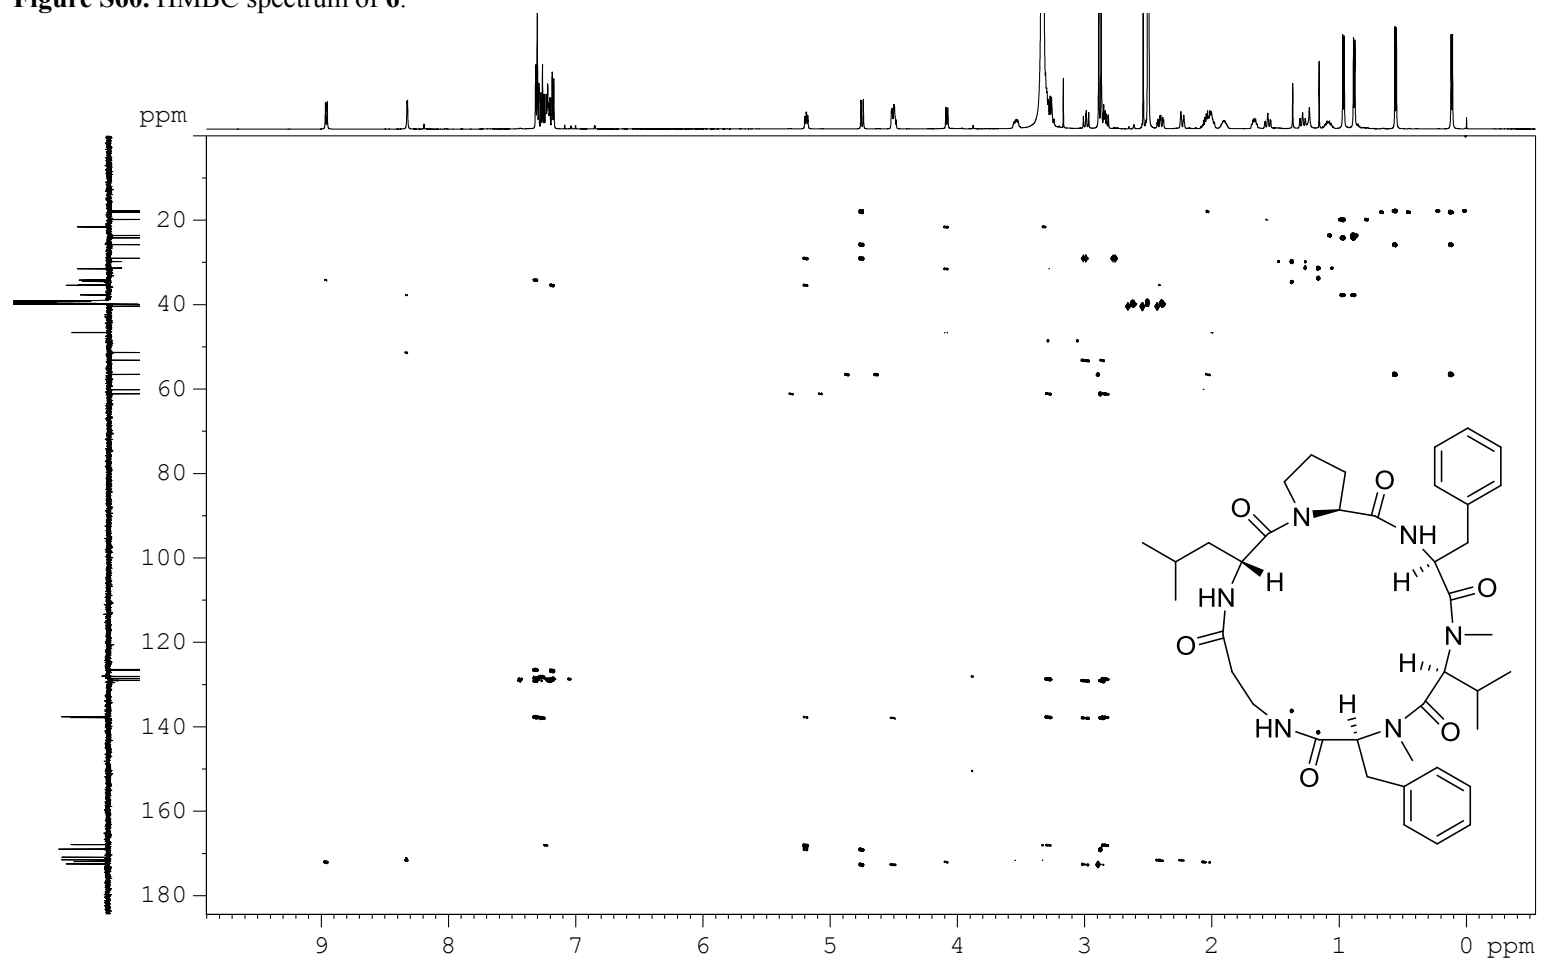





Figure S62. IR spectrum of 6.

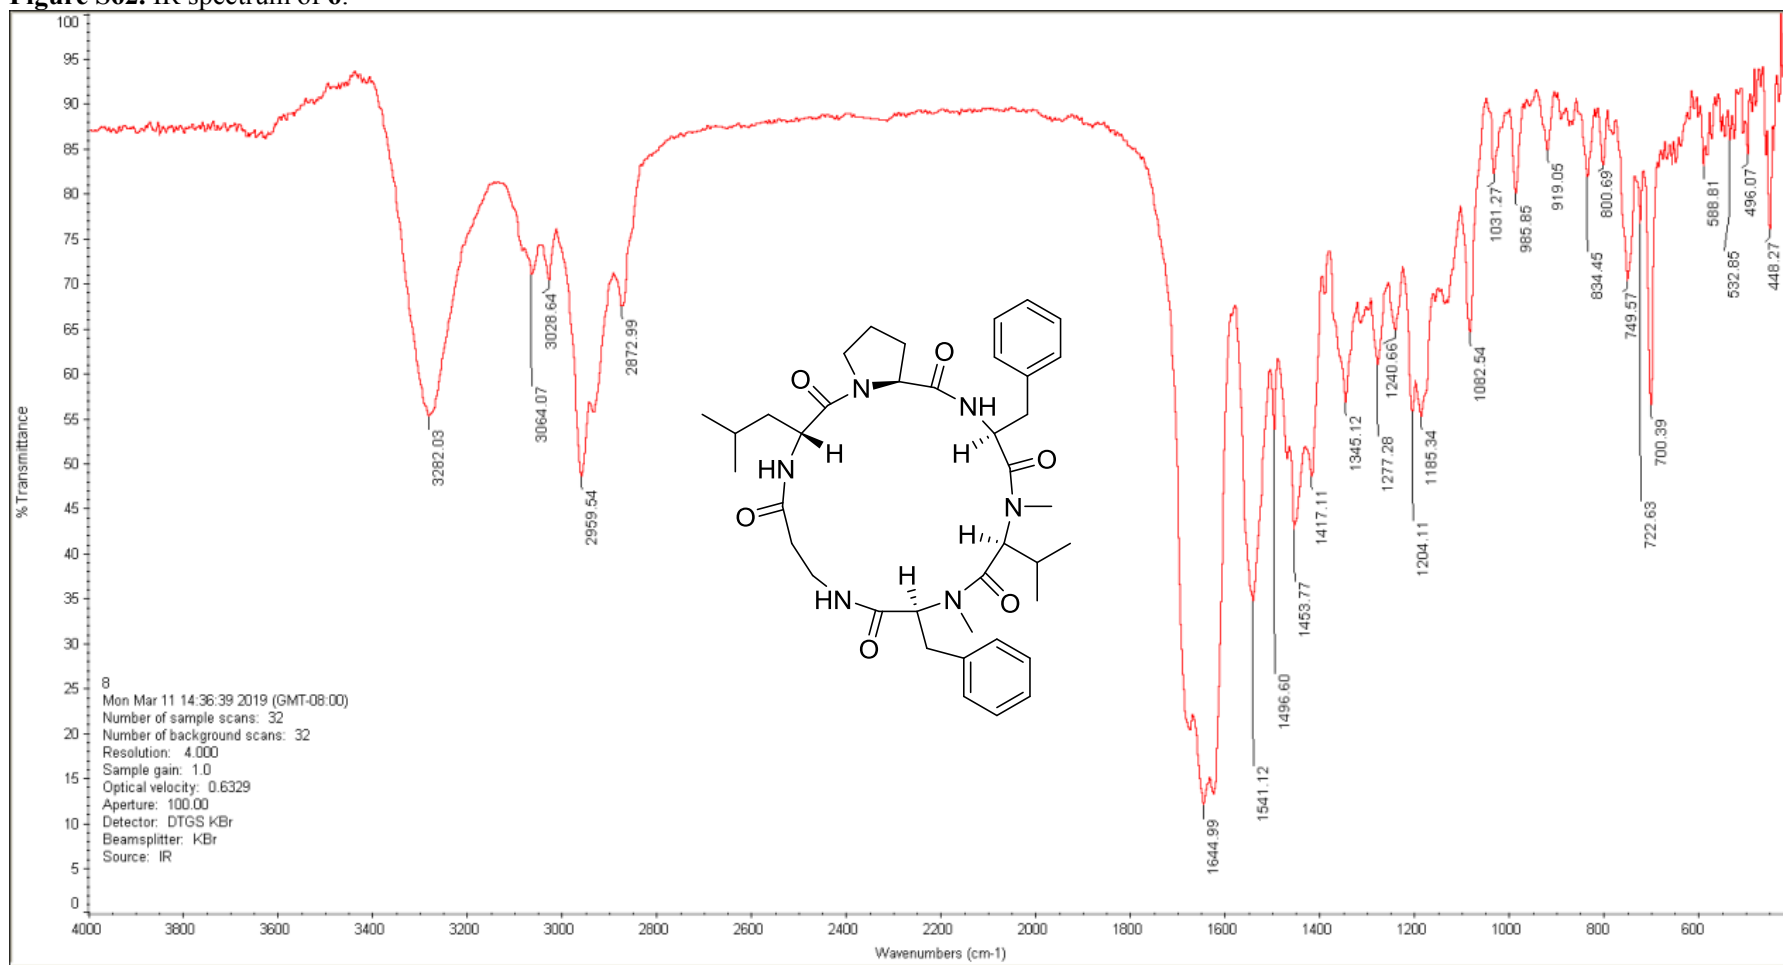

**Figure S63.** HRESIMS spectrum of **6**.

Xevo G2 Q-TOF/YCA166#

09-May-2018

Waters

10-11-10-1-2 12 (0.220) Cm (11:15-(2:7+31:58))

TOF MS ES+  
1.65e6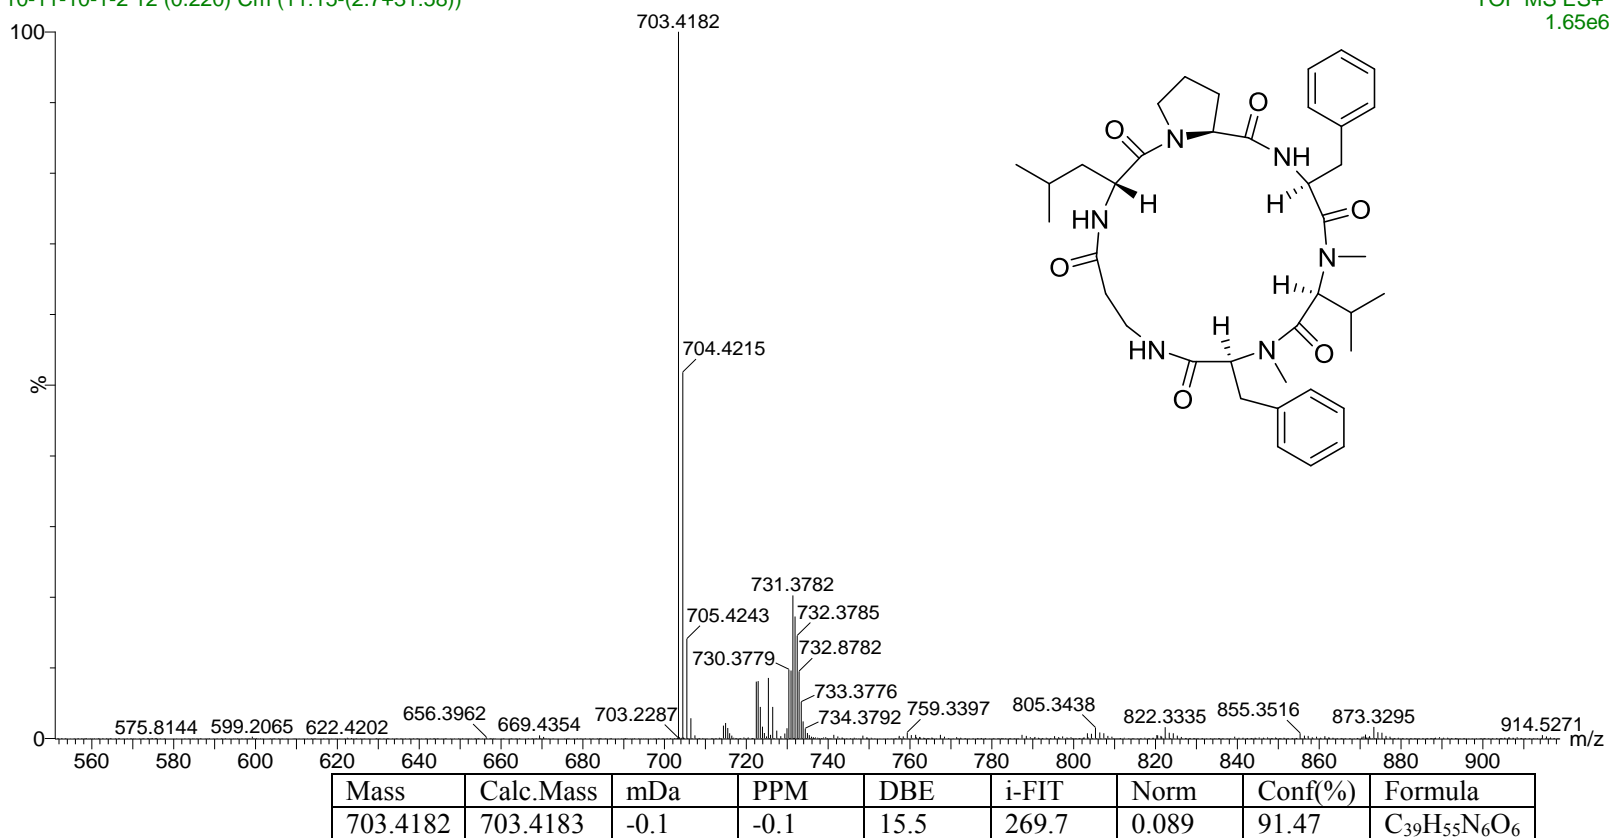

Figure S64.  $^1\text{H}$  NMR spectrum of **7** (600 MHz,  $\text{DMSO-}d_6$ ).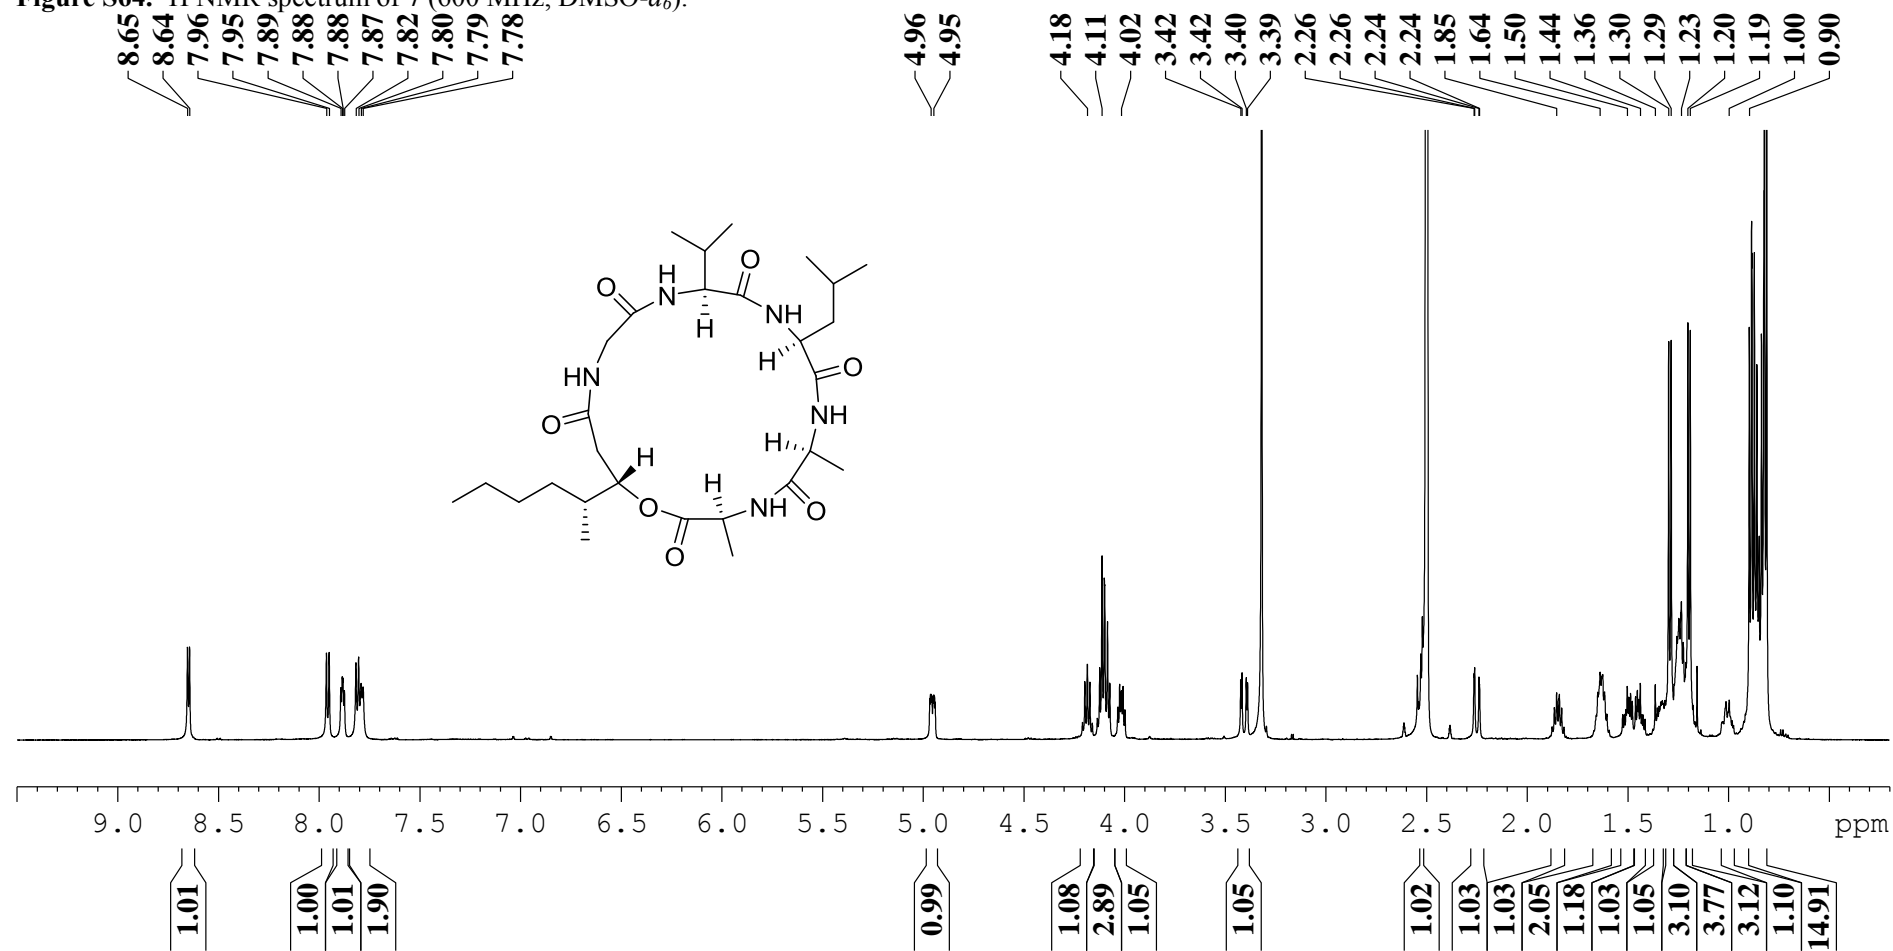

**Figure S65.**  $^{13}\text{C}$  APT spectrum of **7** (600 MHz,  $\text{DMSO-}d_6$ ).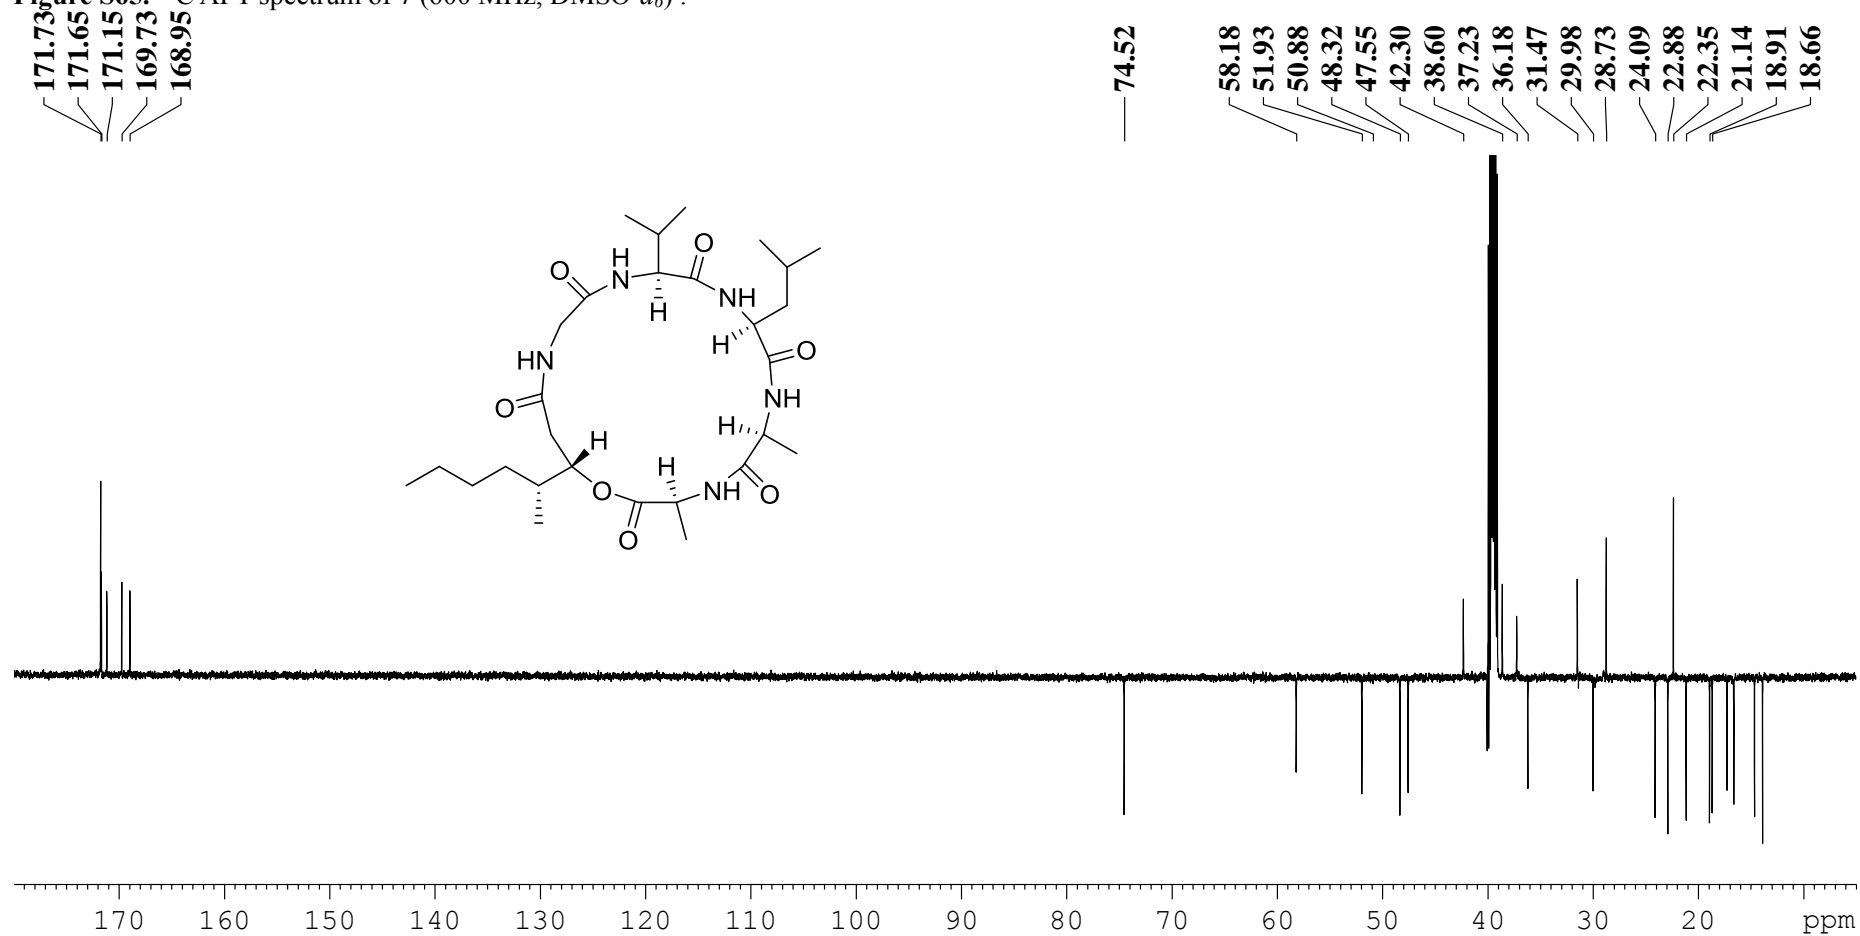

Figure S66.  $^1\text{H}$ - $^1\text{H}$  COSY spectrum of 7.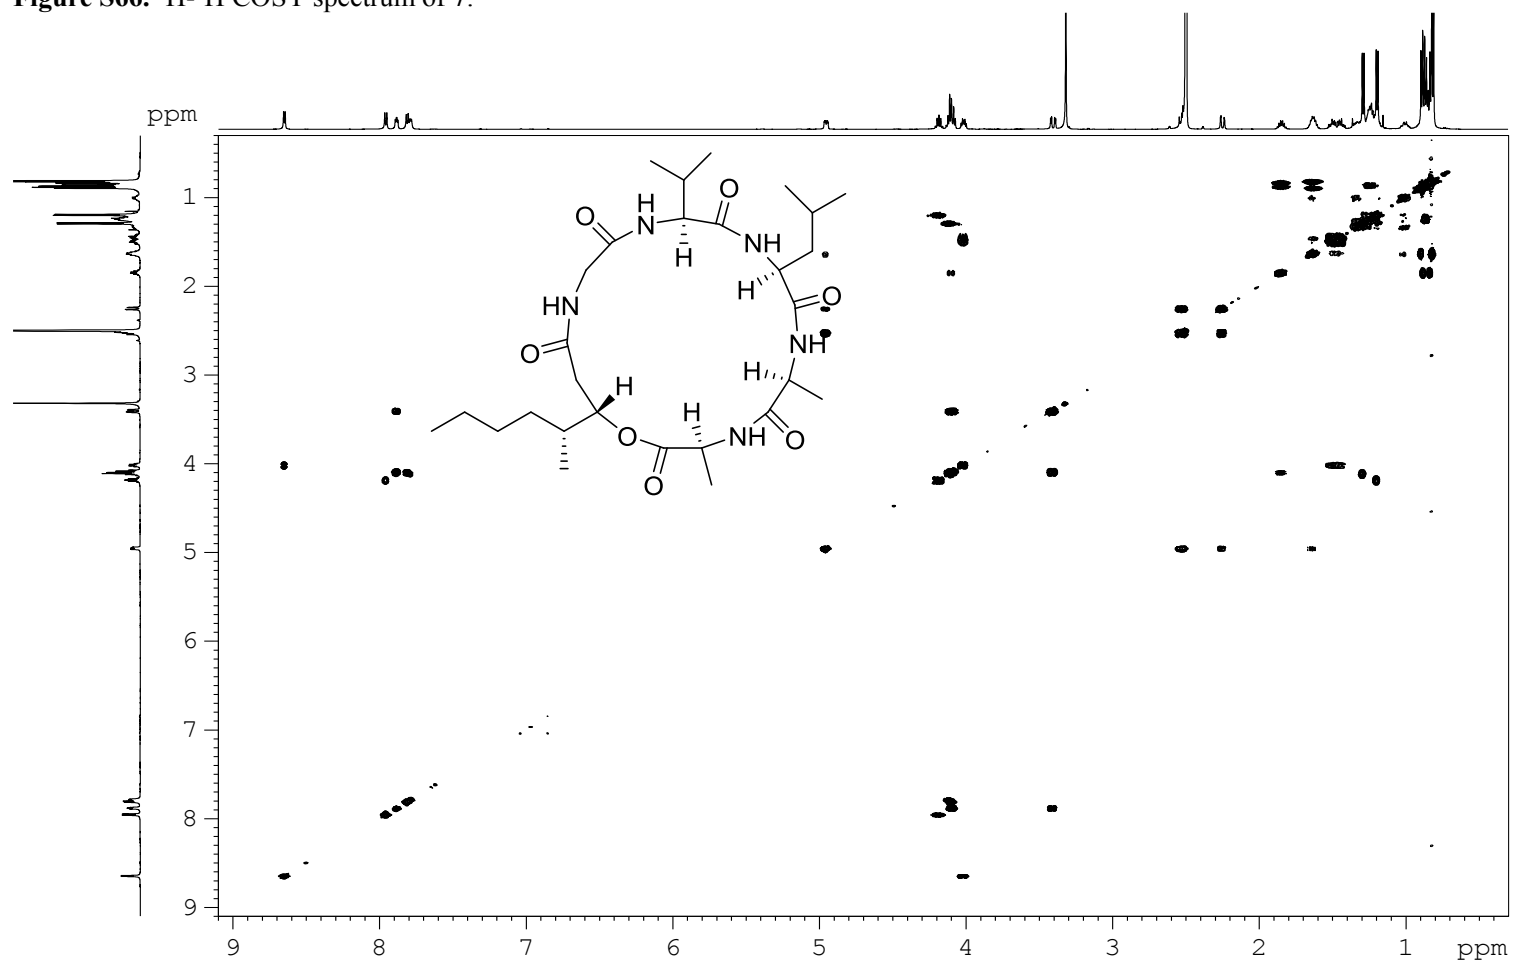

Figure S67. HSQC spectrum of 7.

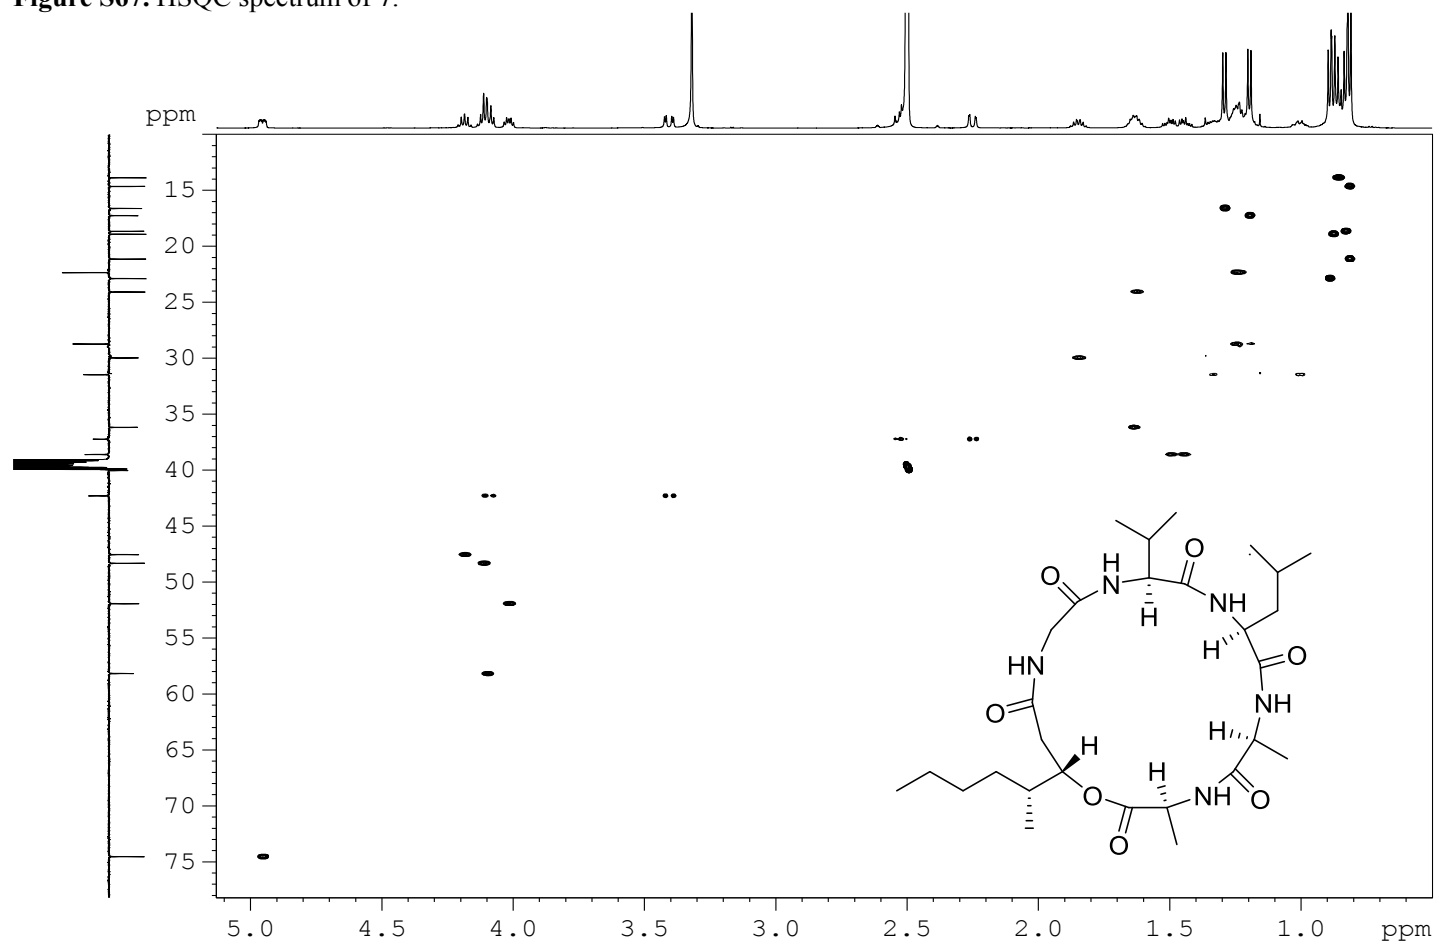

Figure S68. HMBC spectrum of 7.

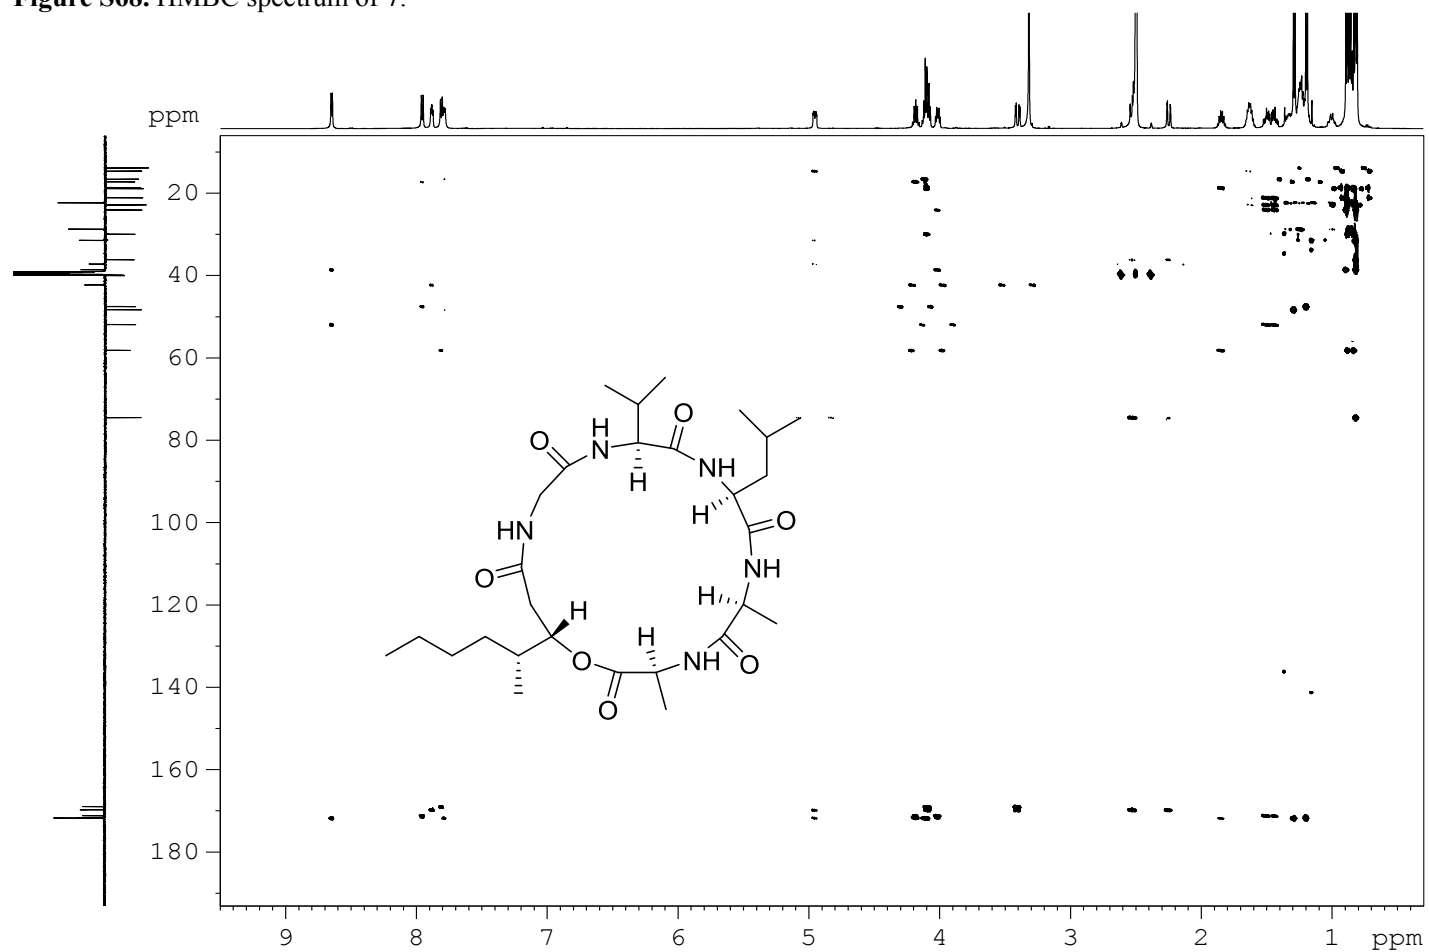

Figure S69. NOESY spectrum of 7.

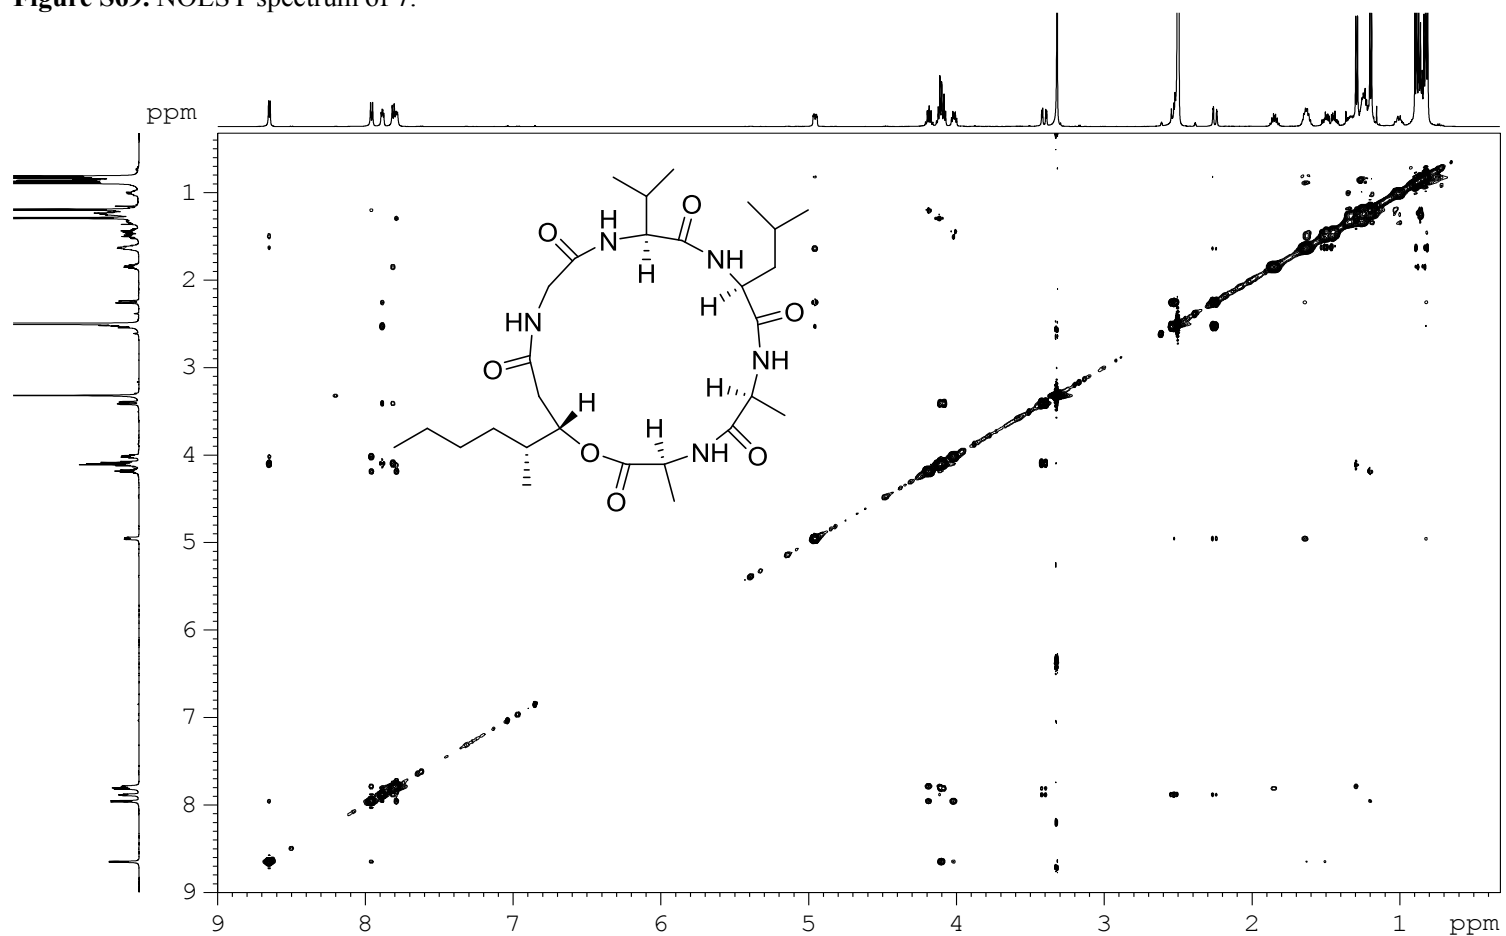



Figure S70. IR spectrum of 7.

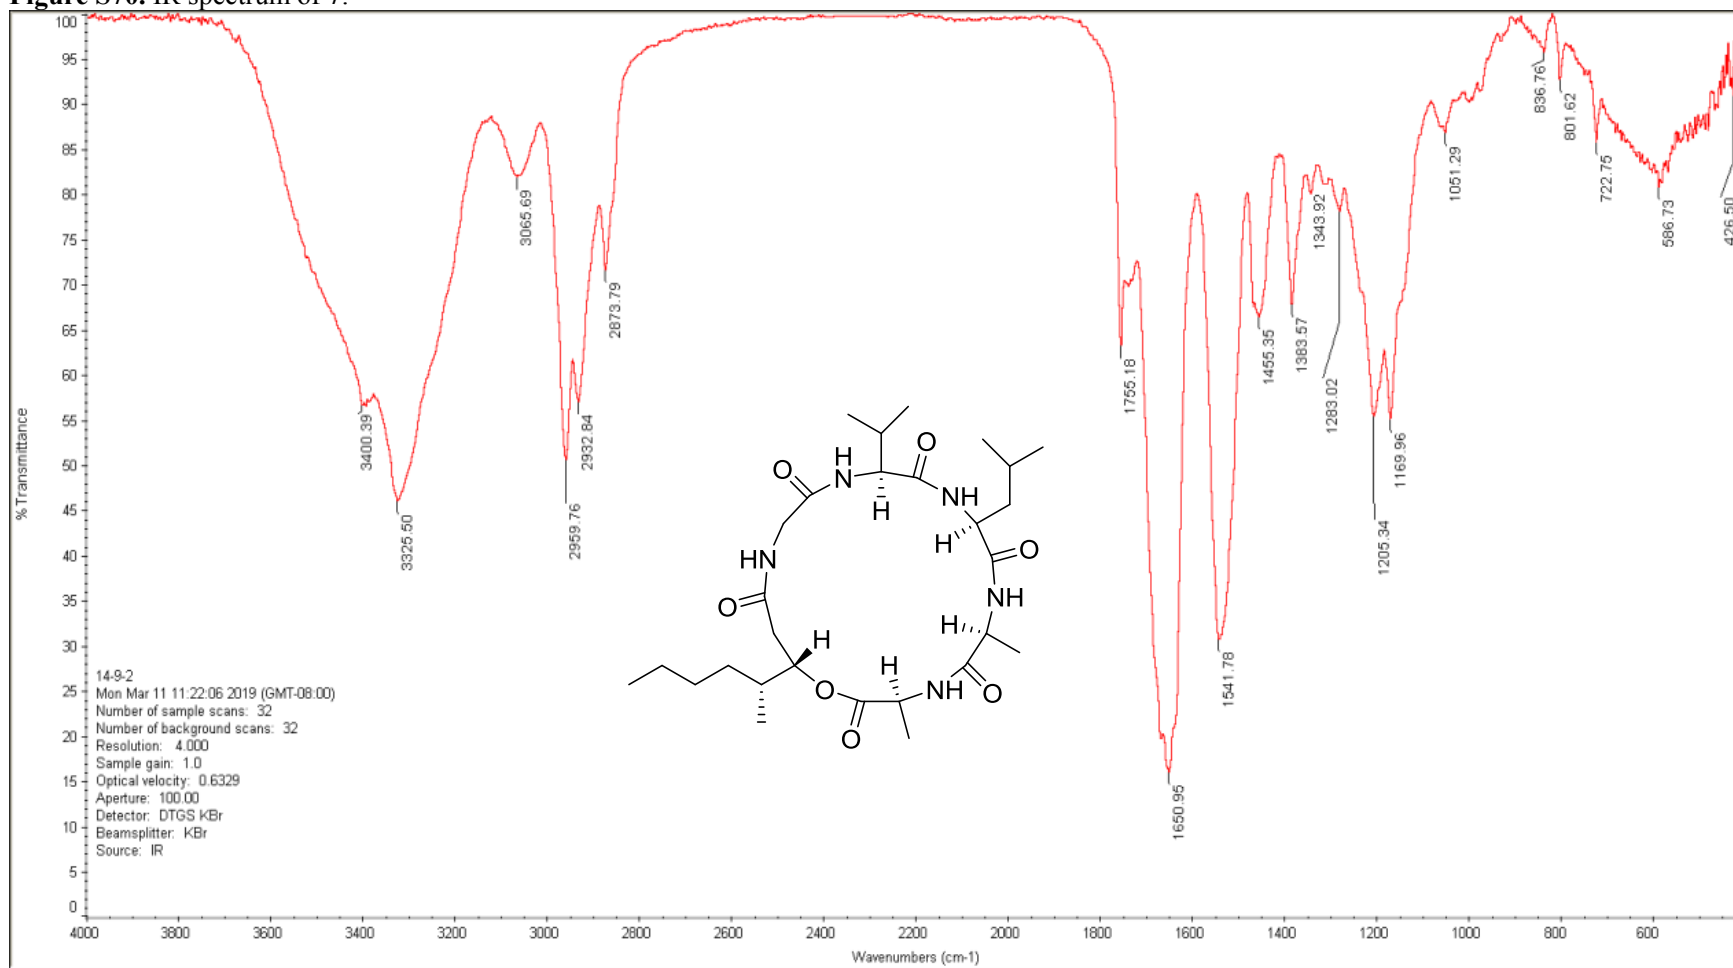

**Figure S71.** HRESIMS spectrum of **7**.

Xevo G2 Q-TOF/YCA166#

14-9-2 12 (0.233) Cm (11:15-(1:8+33:55))

04-Mar-2019

Waters  
1: TOF MS ES+  
8.05e5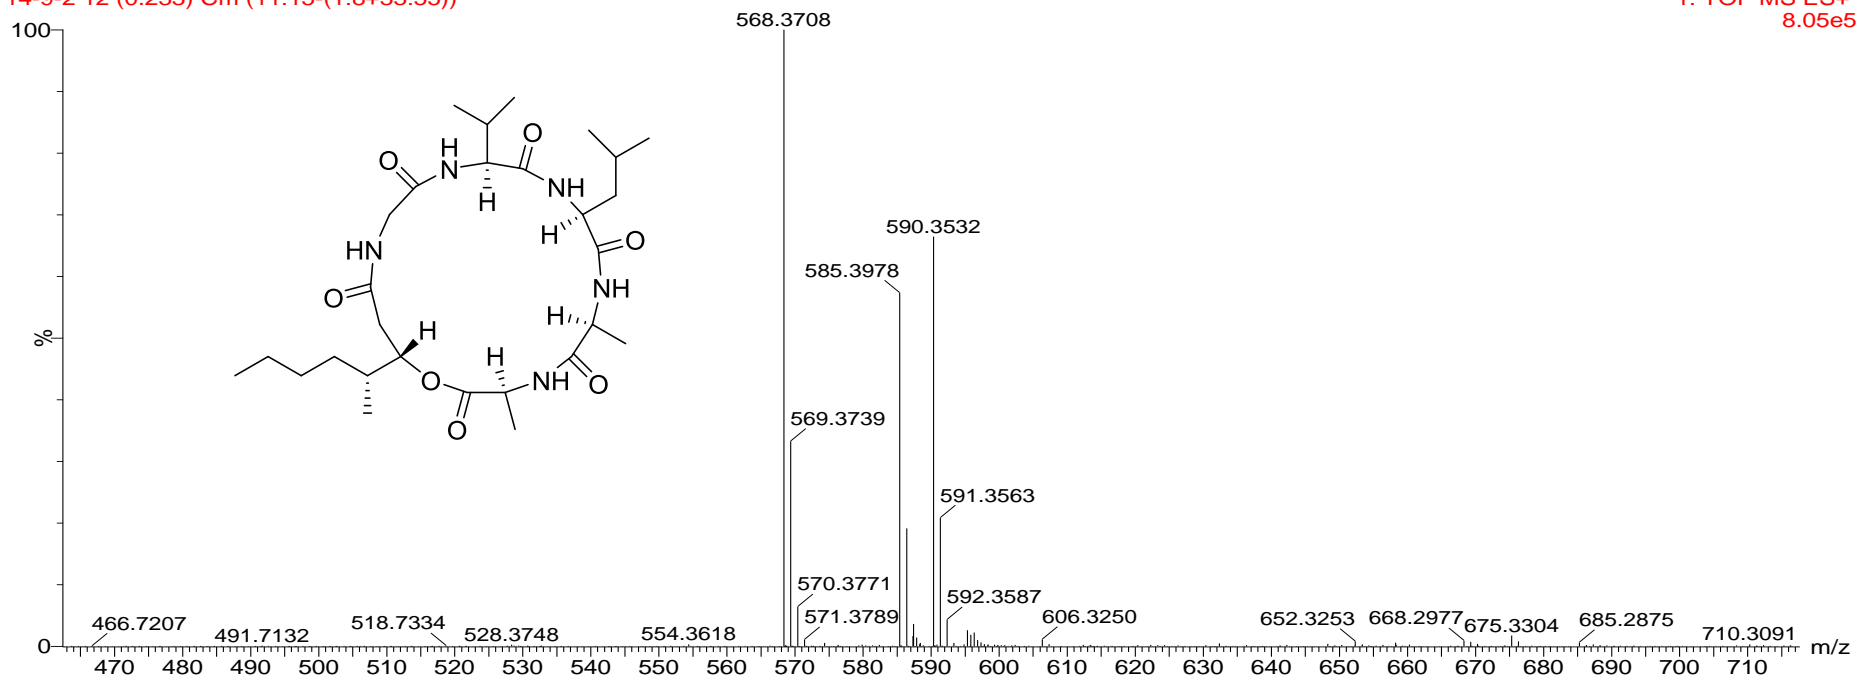

| Mass     | Calc.Mass | mDa  | PPM  | DBE | i-FIT | Norm  | Conf(%) | Formula                                                       |
|----------|-----------|------|------|-----|-------|-------|---------|---------------------------------------------------------------|
| 568.3708 | 568.3710  | -0.2 | -0.4 | 6.5 | 250.4 | 0.018 | 98.20   | C <sub>28</sub> H <sub>50</sub> N <sub>5</sub> O <sub>7</sub> |

**Figure S72.**  $^1\text{H}$  and  $^{13}\text{C}$  NMR and ESIMS spectra of roseotoxin C (**8**). $^1\text{H}$  NMR spectrum of **8** (400 MHz,  $\text{DMSO-}d_6$ ).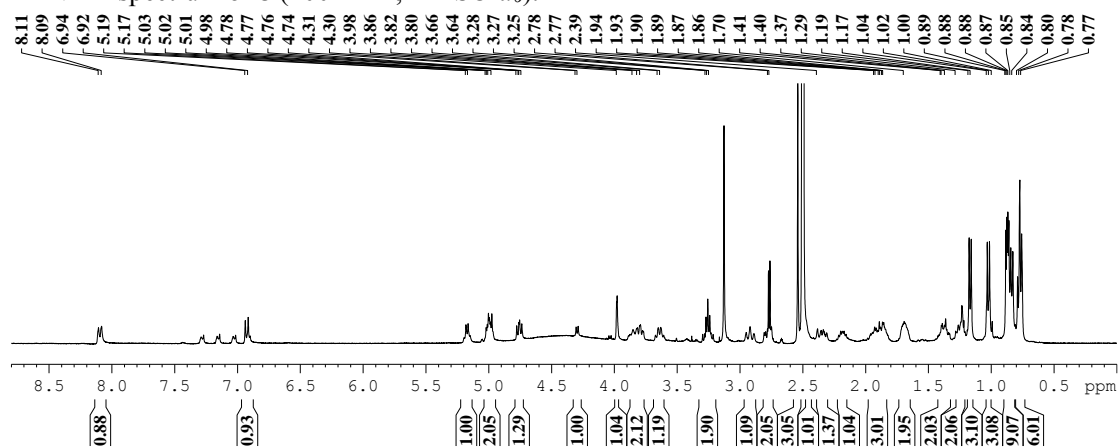 $^{13}\text{C}$  APT spectrum of **8** (400 MHz,  $\text{DMSO-}d_6$ ).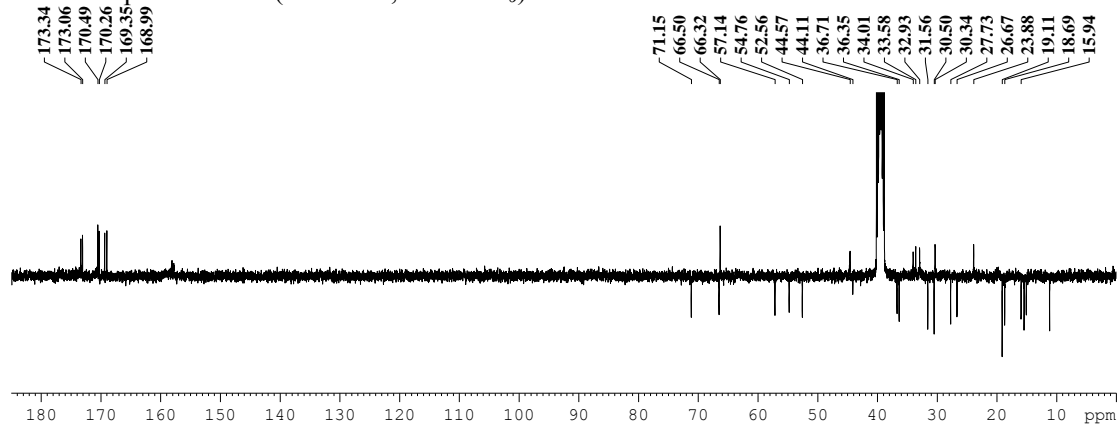ESIMS spectrum of **8**.

Xevo G2 Q-TOF/YCA166#

4-6-f-a-5 13 (0.237) Cm (11:17-(2:6+21:27))

16-Apr-2018

Waters  
TOF MS ES+  
5.99e5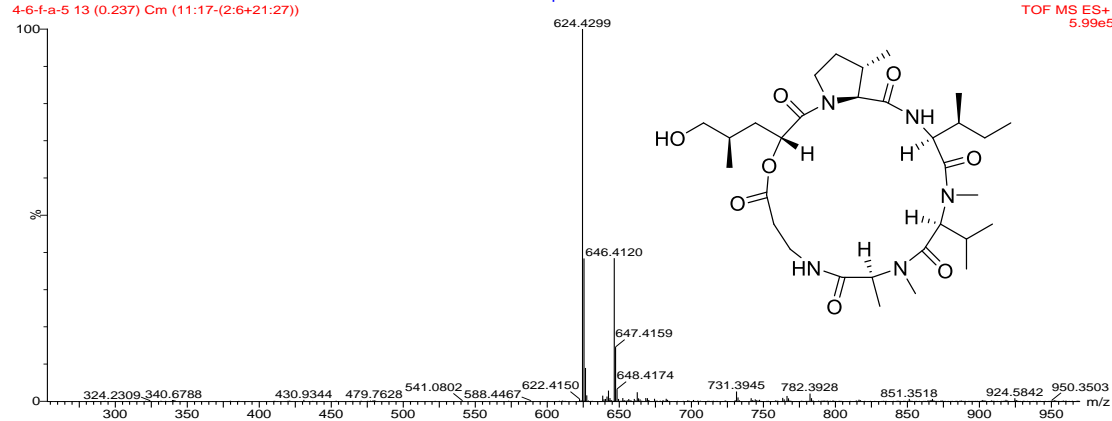



**Figure S74.**  $^1\text{H}$  and  $^{13}\text{C}$  NMR and ESIMS spectra of roseotoxin A (**10**) $^1\text{H}$  NMR spectrum of **10** (400 MHz,  $\text{DMSO-}d_6$ ).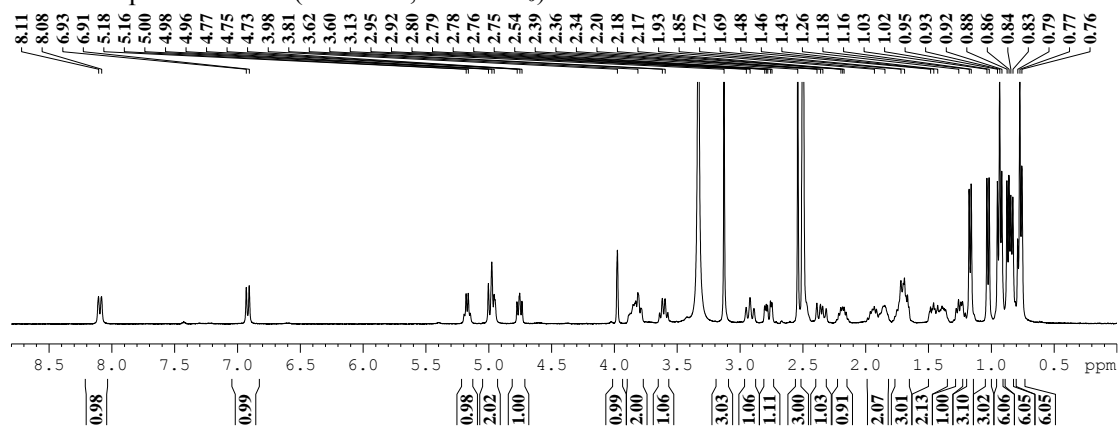 $^{13}\text{C}$  APT spectrum of **10** (400 MHz,  $\text{DMSO-}d_6$ ).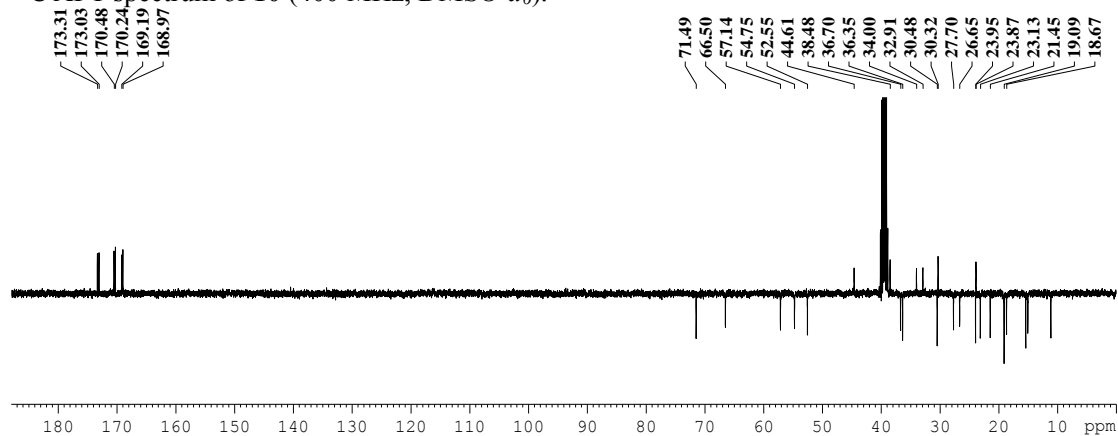ESIMS spectrum of **10**.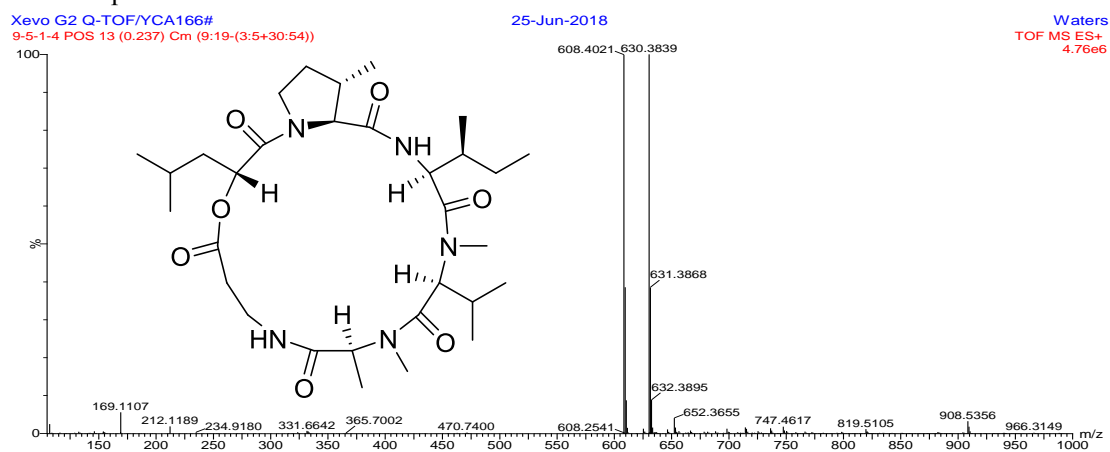



**Figure S76.**  $^1\text{H}$  and  $^{13}\text{C}$  NMR and ESIMS spectra of destruxin A (**12**). $^1\text{H}$  NMR spectrum of **12** (400 MHz,  $\text{DMSO-}d_6$ ).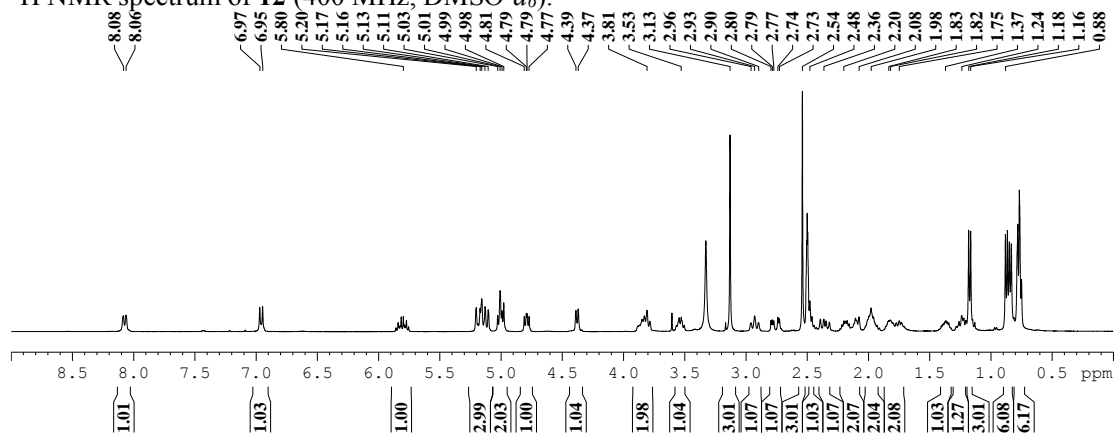 $^{13}\text{C}$  APT spectrum of **12** (400 MHz,  $\text{DMSO-}d_6$ ).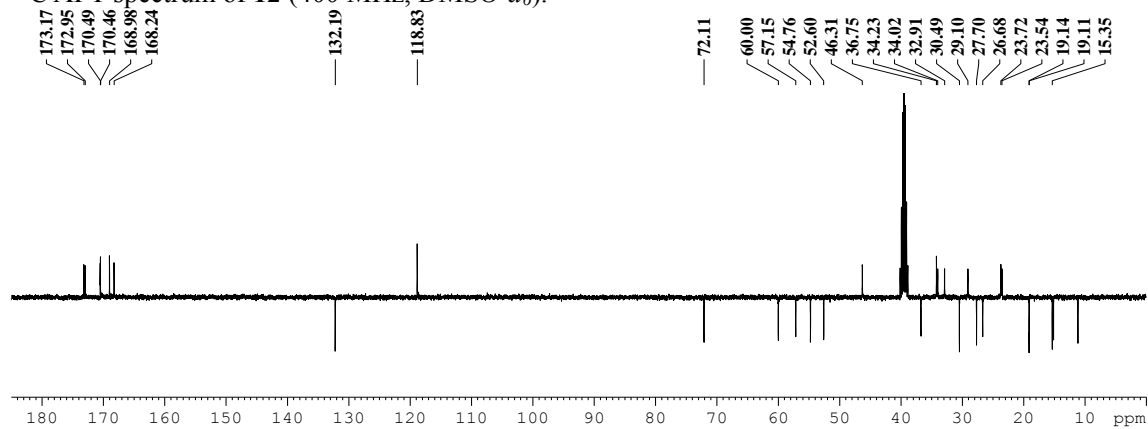ESIMS spectrum of **12**.

Xevo G2 Q-TOF/YCA166#

4 13 (0.237) Cm (11:18-(1:5+28:55))

16-Apr-2018

Waters  
TOF MS ES+  
6.64e5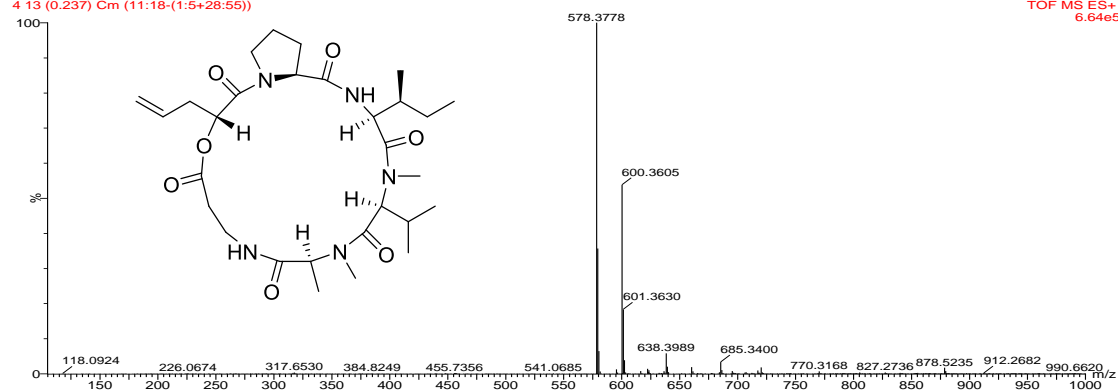

**Figure S77.**  $^1\text{H}$  and  $^{13}\text{C}$  NMR and ESIMS spectra of destruxin C (**13**). $^1\text{H}$  NMR spectrum of **13** (400 MHz,  $\text{DMSO-}d_6$ ).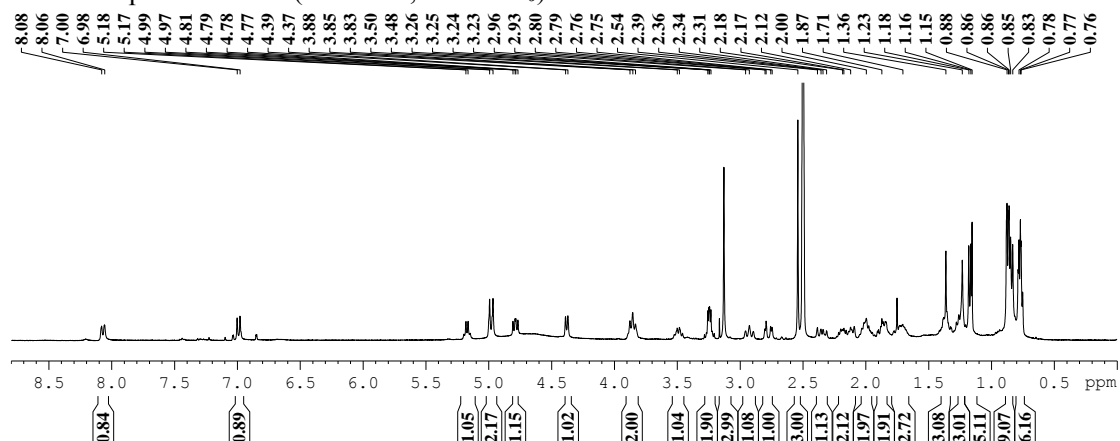 $^{13}\text{C}$  APT spectrum of **13** (400 MHz,  $\text{DMSO-}d_6$ ).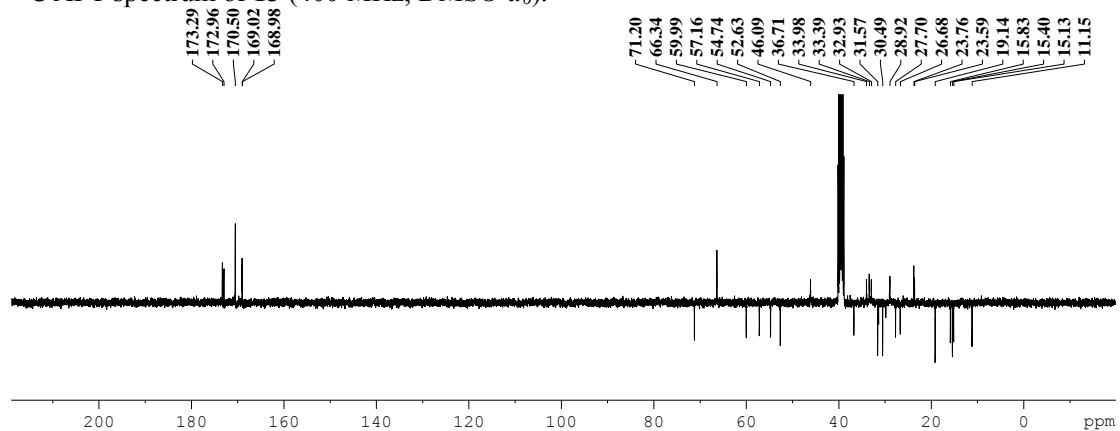ESIMS spectrum of **13**.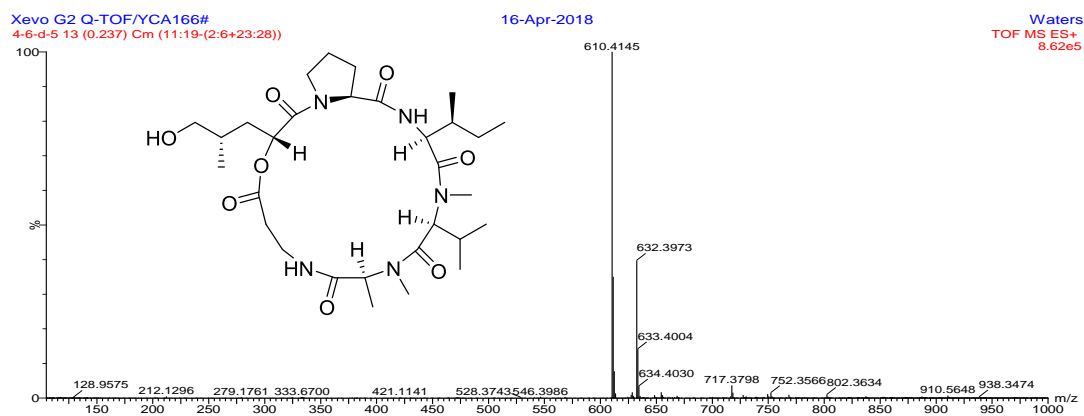



**Figure S78.**  $^1\text{H}$  and  $^{13}\text{C}$  NMR and ESIMS spectra of destruxin D (**14**) $^1\text{H}$  NMR spectrum of **14** (400 MHz,  $\text{DMSO-}d_6$ ).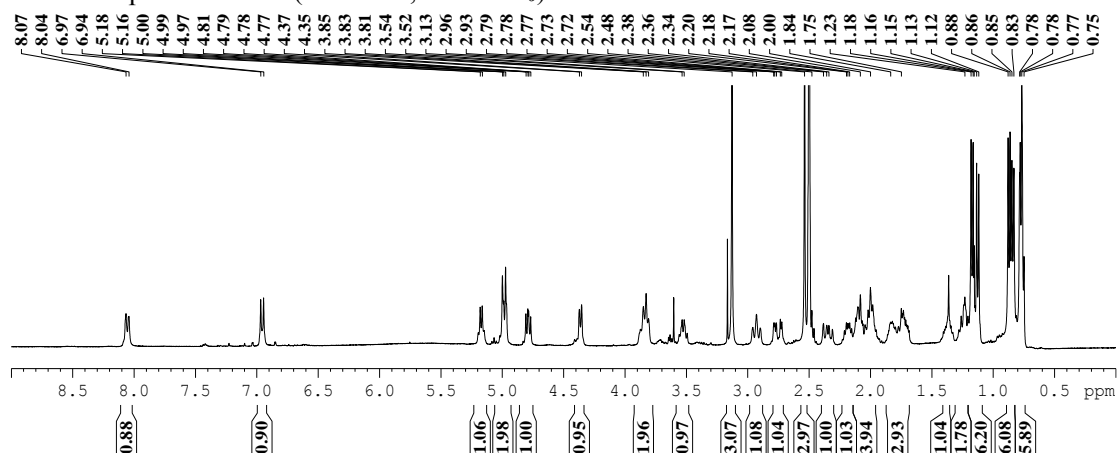 $^{13}\text{C}$  APT spectrum of **14** (400 MHz,  $\text{DMSO-}d_6$ ).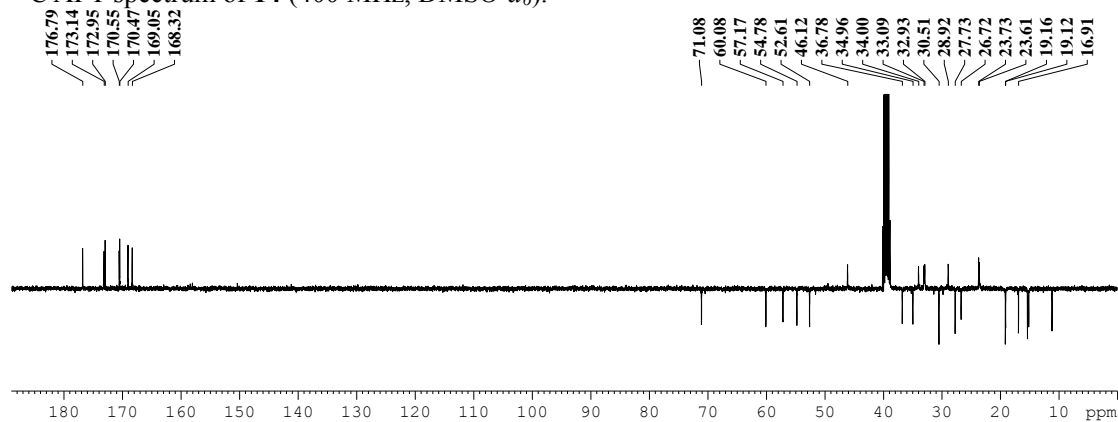ESIMS spectrum of **14**.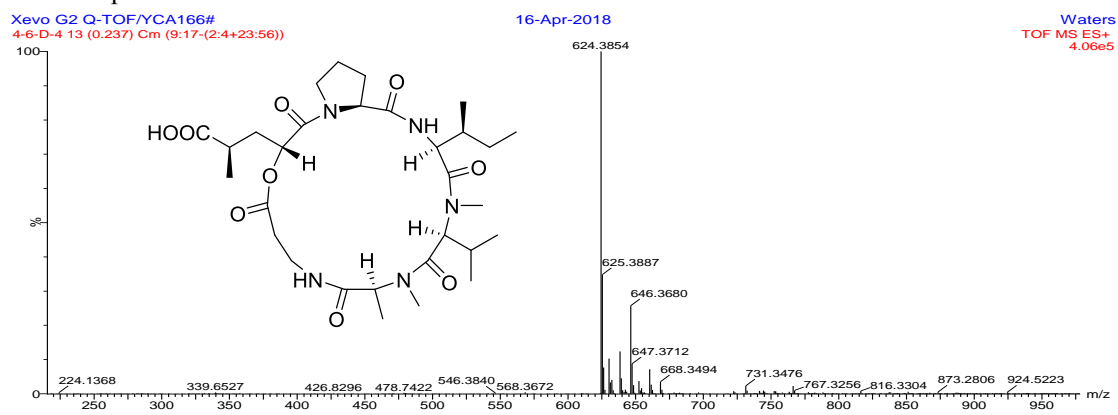

**Figure S79.**  $^1\text{H}$  and  $^{13}\text{C}$  NMR and ESIMS spectra of destruxin Ed (**15**). $^1\text{H}$  NMR spectrum of **15** (400 MHz,  $\text{DMSO-}d_6$ ).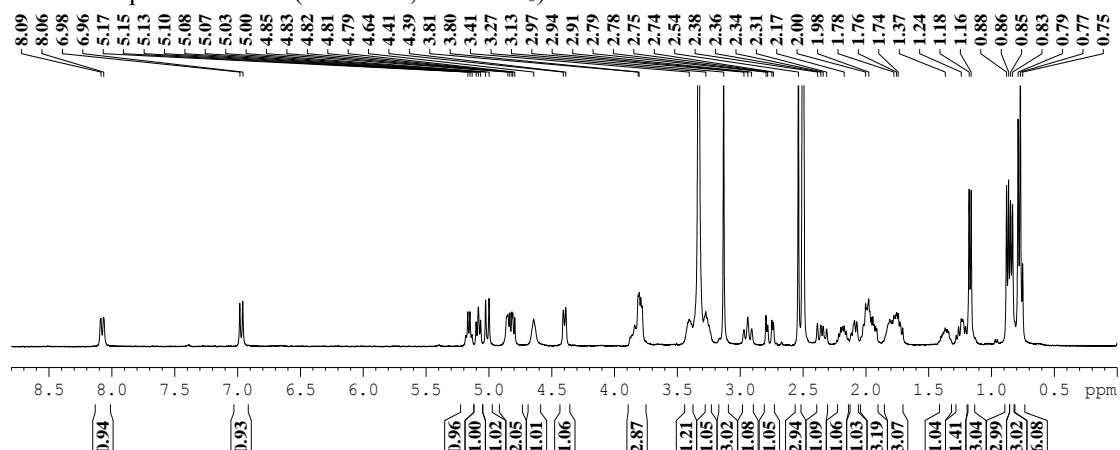 $^{13}\text{C}$  APT spectrum of **15** (400 MHz,  $\text{DMSO-}d_6$ ).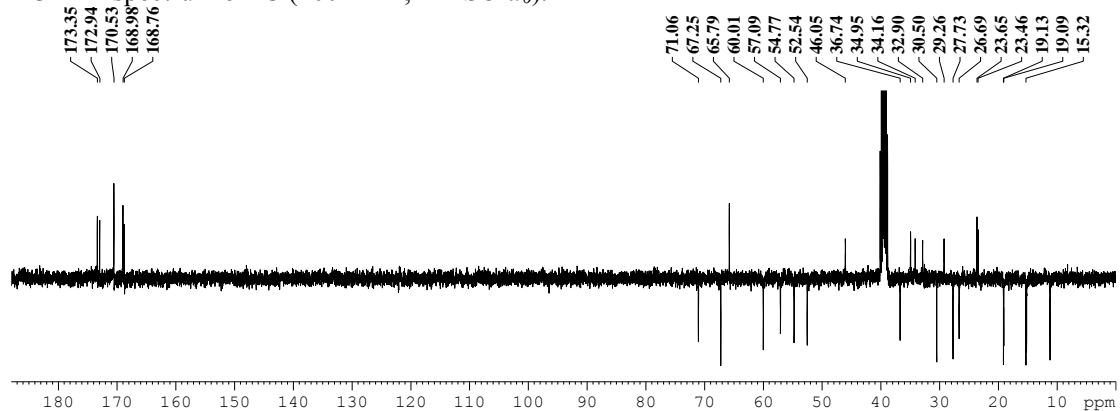ESIMS spectrum of **15**.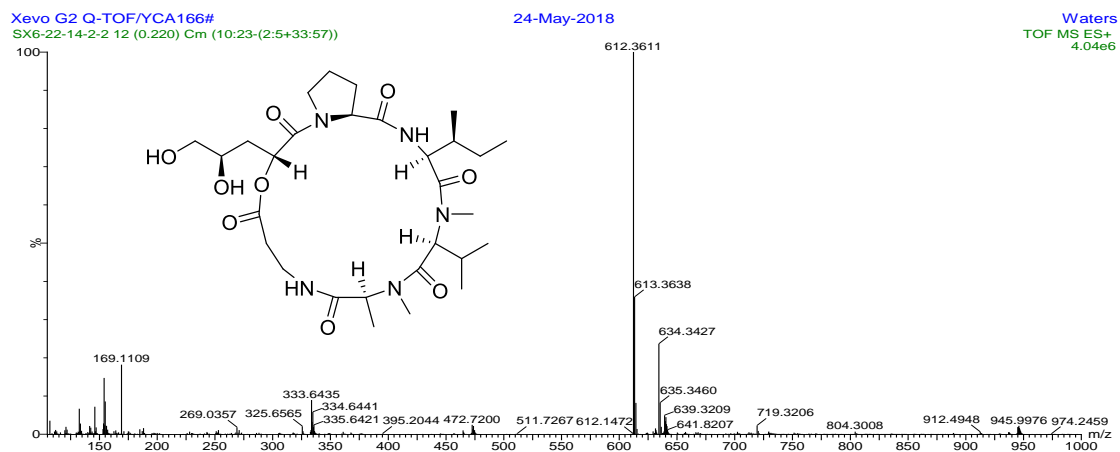

**Figure S80.**  $^1\text{H}$  and  $^{13}\text{C}$  NMR and ESIMS spectra of destruxin F (**16**). $^1\text{H}$  NMR spectrum of **16** (400 MHz,  $\text{DMSO-}d_6$ ).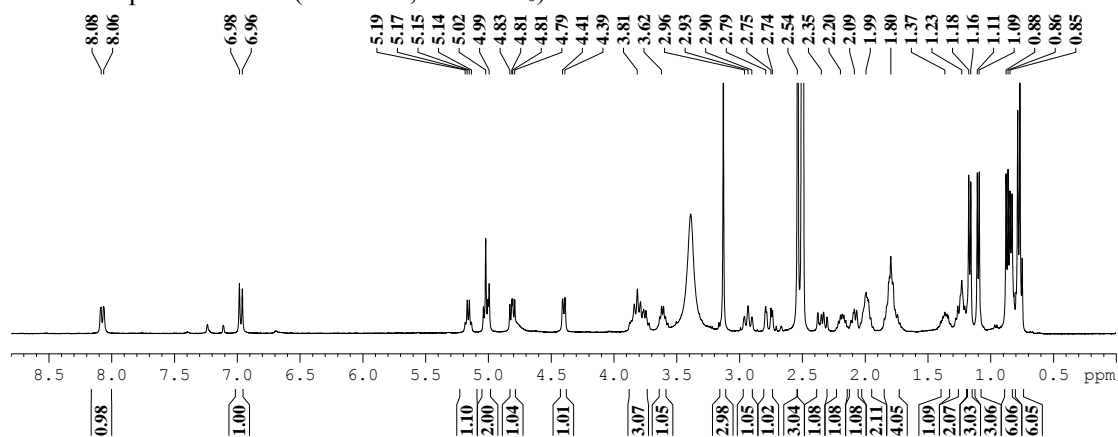 $^{13}\text{C}$  APT spectrum of **16** (400 MHz,  $\text{DMSO-}d_6$ ).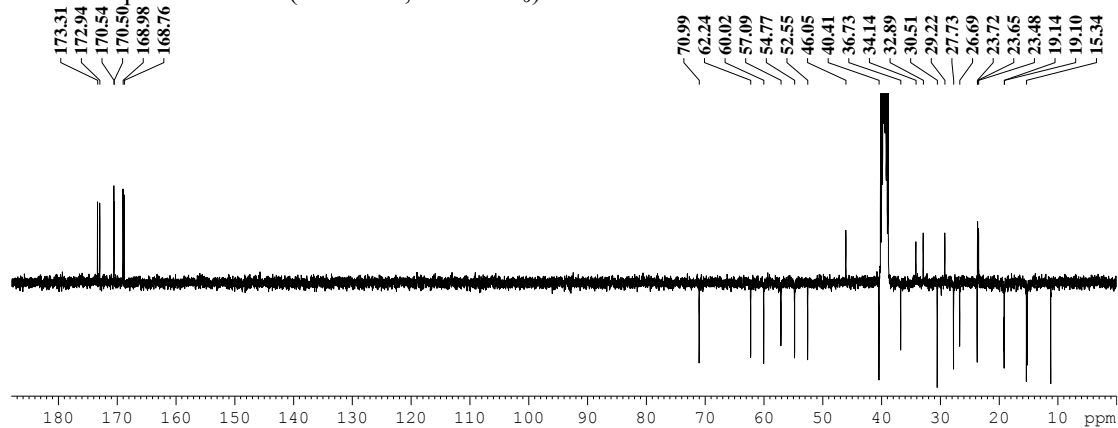ESIMS spectrum of **16**.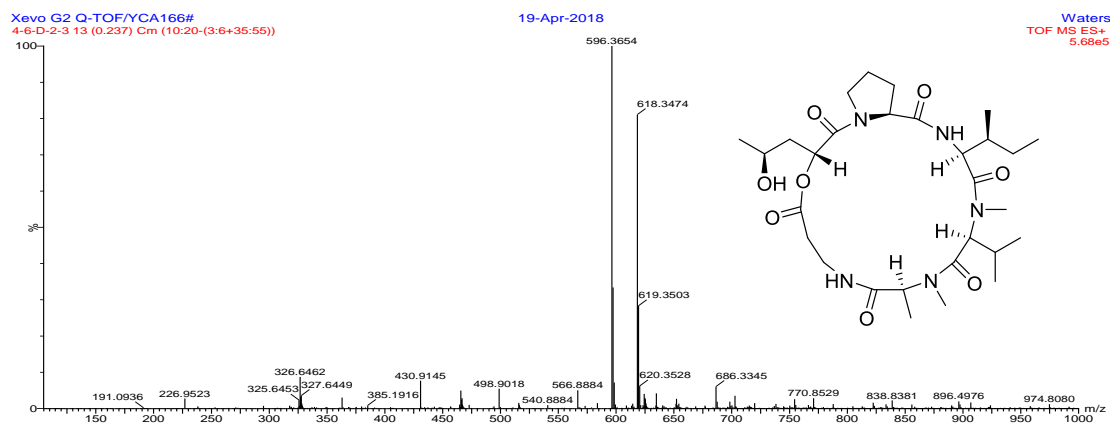



**Figure S82.**  $^1\text{H}$  and  $^{13}\text{C}$  NMR and ESIMS spectra of destruxin Brh (**18**). $^1\text{H}$  NMR spectrum of **18** (400 MHz,  $\text{DMSO-}d_6$ ).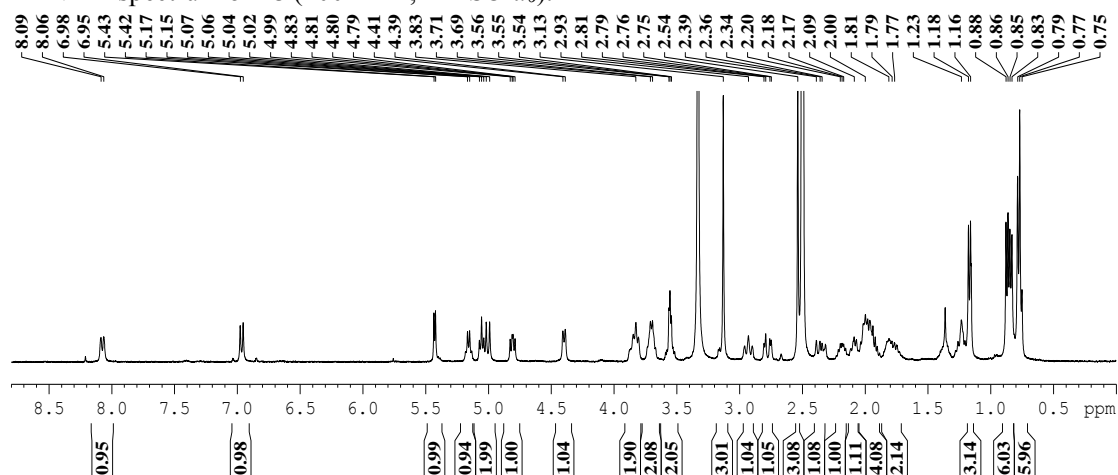 $^{13}\text{C}$  APT spectrum of **18** (400 MHz,  $\text{DMSO-}d_6$ ).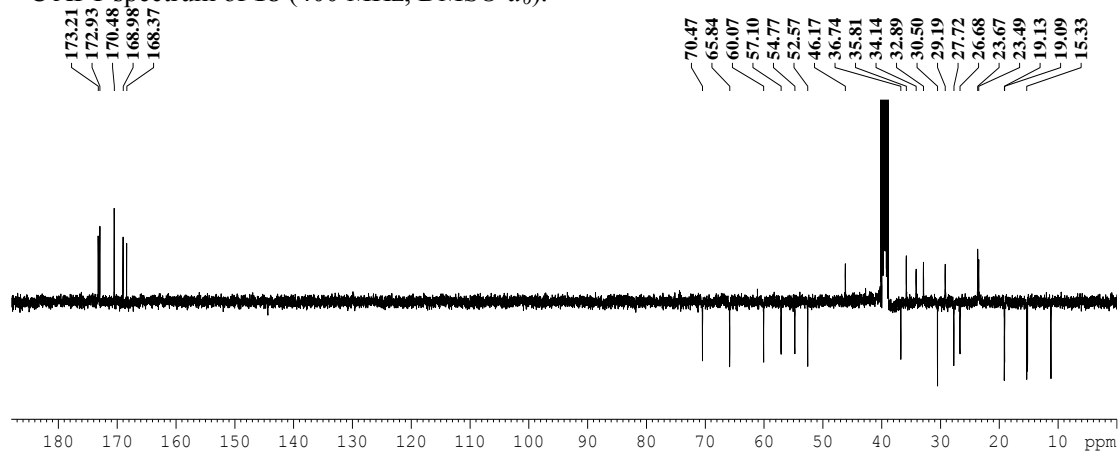ESIMS spectrum of **18**.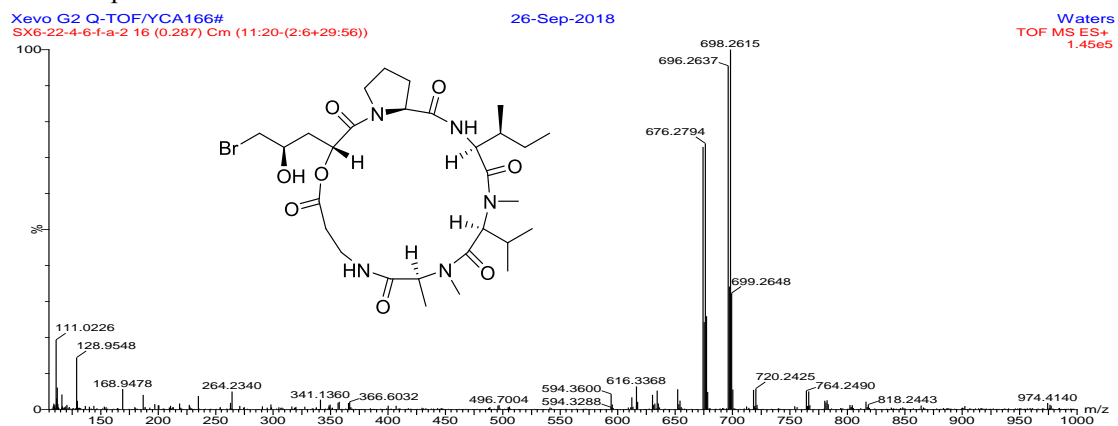

**Figure S83.**  $^1\text{H}$  and  $^{13}\text{C}$  NMR and ESIMS spectra of isaridin C (**19**). $^1\text{H}$  NMR spectrum of **19** (400 MHz,  $\text{DMSO-}d_6$ ).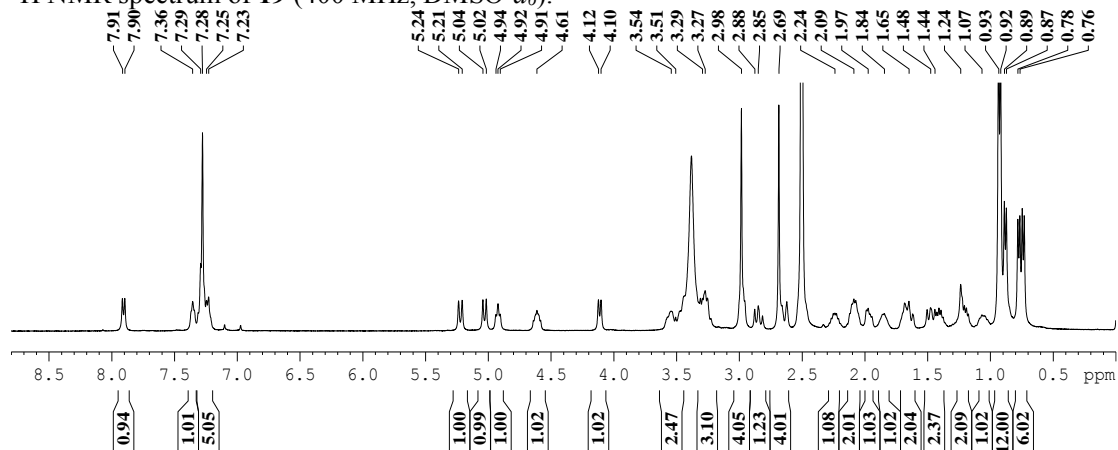 $^{13}\text{C}$  APT spectrum of **19** (400 MHz,  $\text{DMSO-}d_6$ ).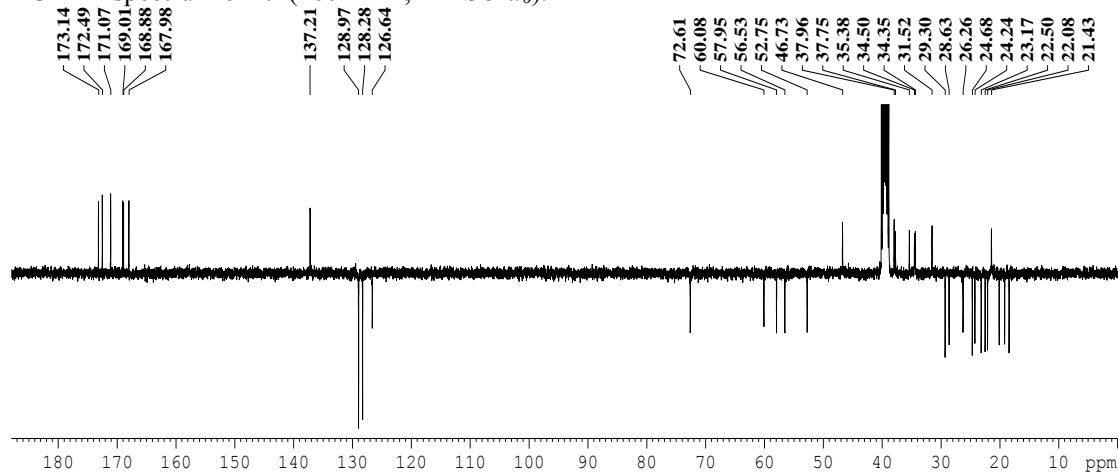ESIMS spectrum of **19**.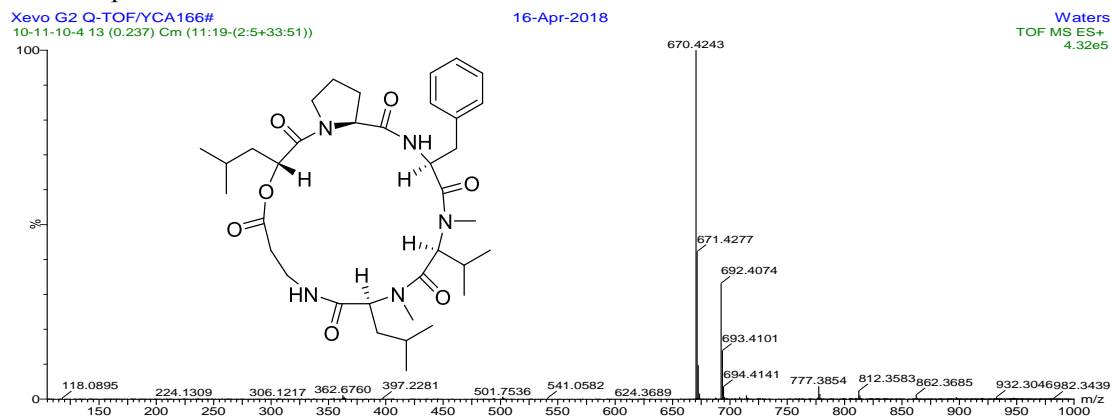



**Figure S85.**  $^1\text{H}$  and  $^{13}\text{C}$  NMR and ESIMS spectra of isariin G1 (**21**). $^1\text{H}$  NMR spectrum of **21** (400 MHz,  $\text{DMSO-}d_6$ ).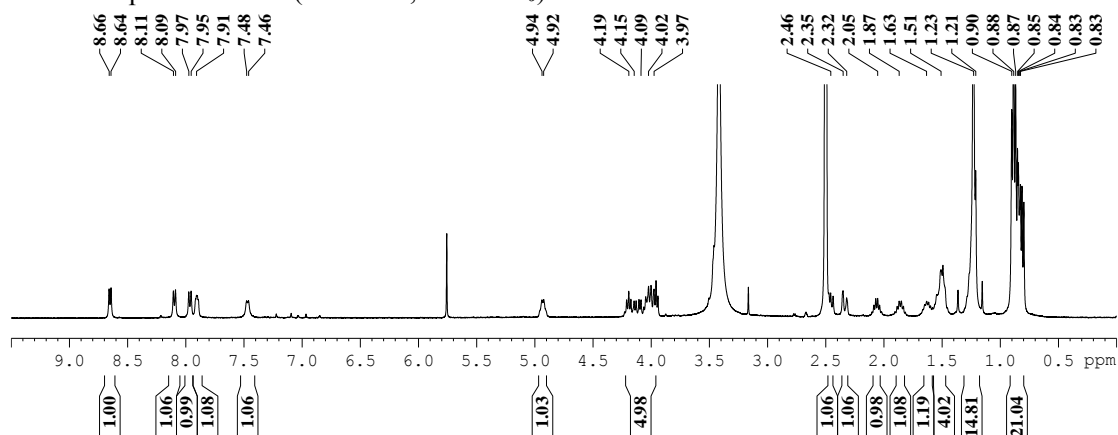APT spectrum of **21** (400 MHz,  $\text{DMSO-}d_6$ ).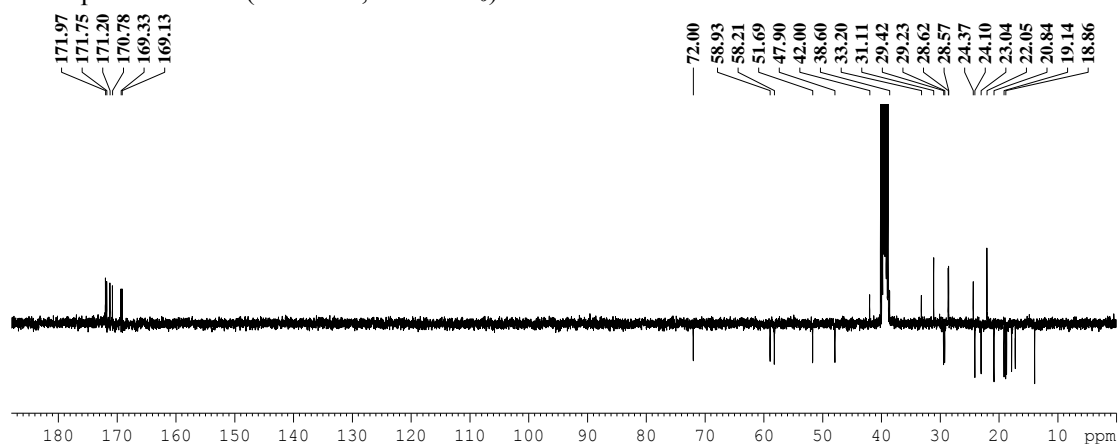ESIMS spectrum of **21**.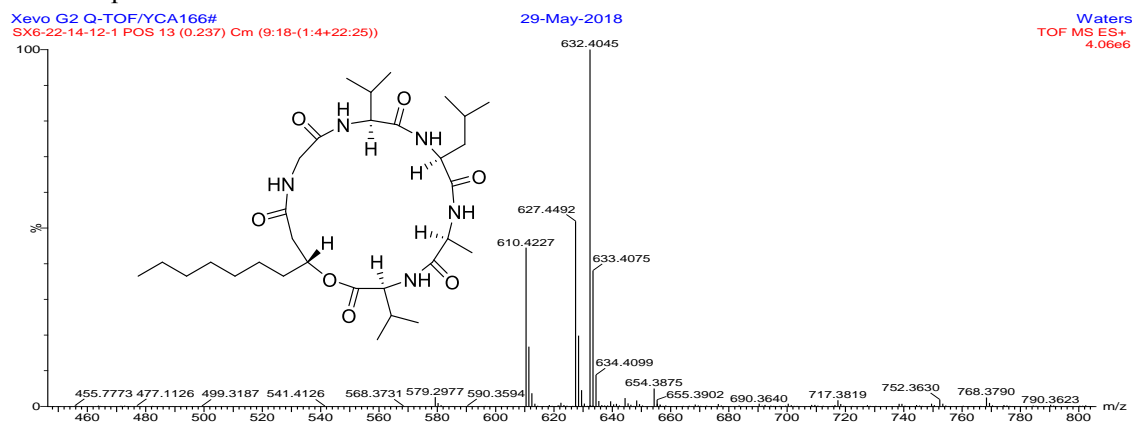



**Figure S86.**  $^1\text{H}$  and  $^{13}\text{C}$  NMR and ESIMS spectra of isariin G2 (**22**). $^1\text{H}$  NMR spectrum of **22** (400 MHz,  $\text{DMSO-}d_6$ ).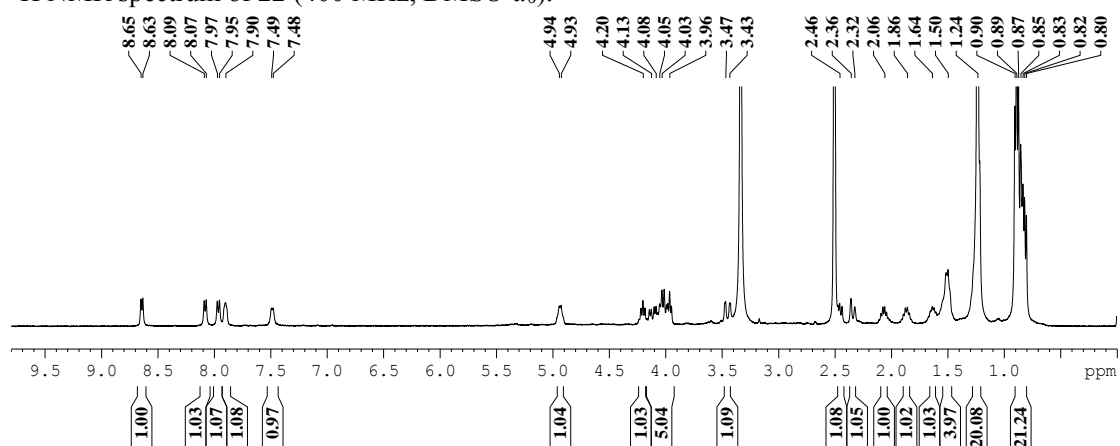 $^{13}\text{C}$  APT spectrum of **22** (400 MHz,  $\text{DMSO-}d_6$ ).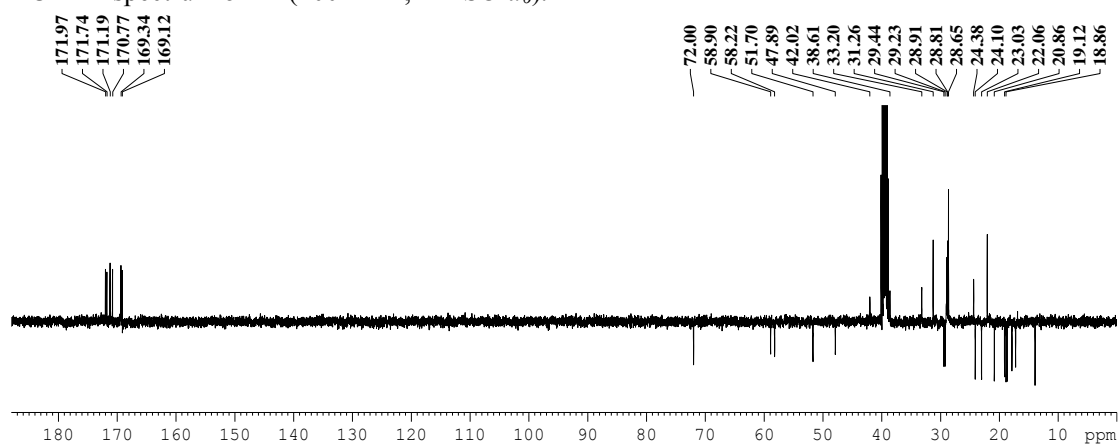ESIMS of **22**.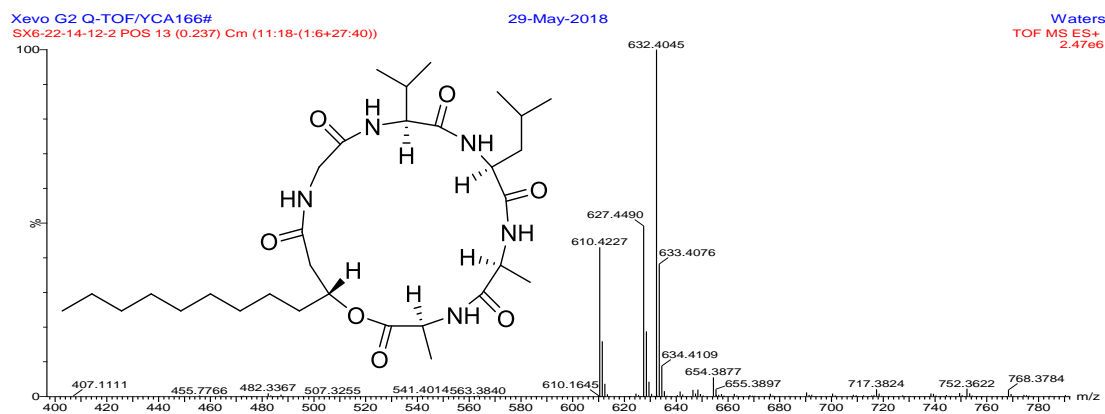



**Figure S88.**  $^1\text{H}$  and  $^{13}\text{C}$  NMR and ESIMS spectra of isariin E (**24**). $^1\text{H}$  NMR spectrum of **24** (400 MHz,  $\text{DMSO-}d_6$ ).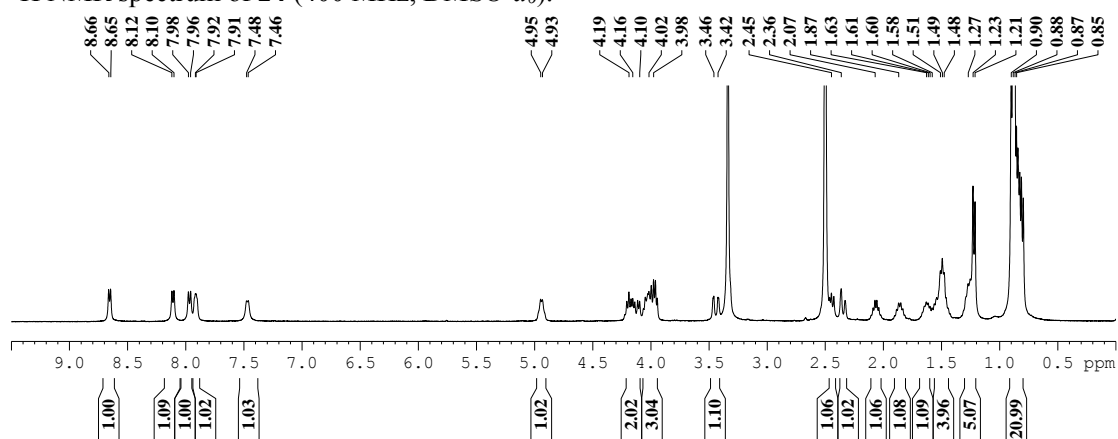 $^{13}\text{C}$  APT spectrum of **24** (400 MHz,  $\text{DMSO-}d_6$ ).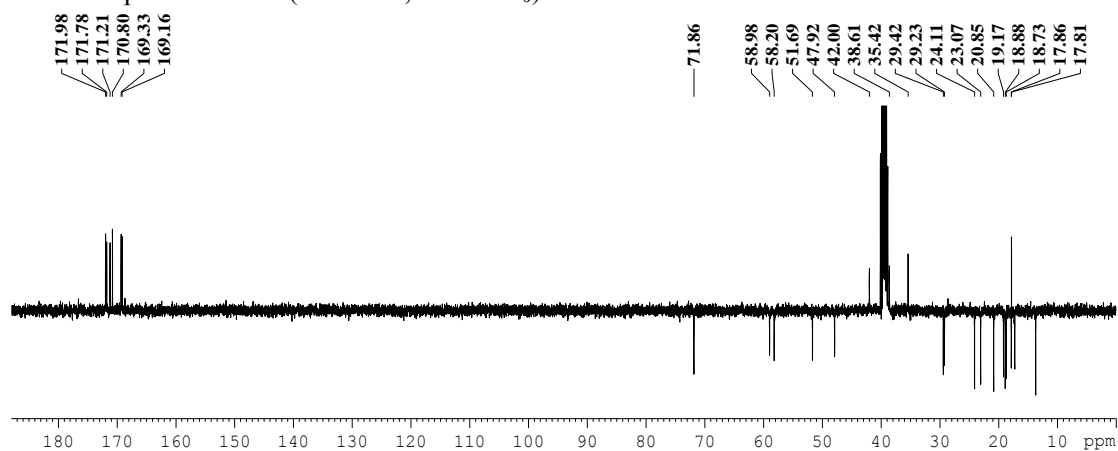ESIMS spectrum of **24**.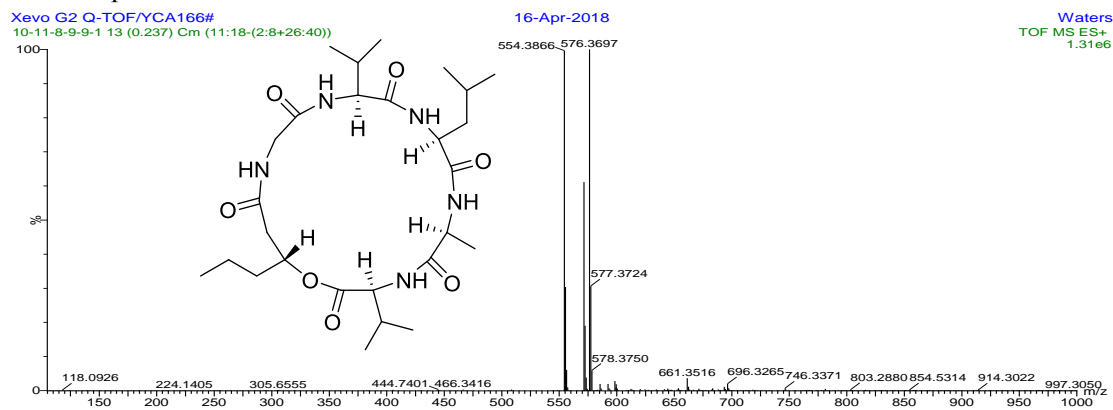

**Figure S89.**  $^1\text{H}$  and  $^{13}\text{C}$  NMR and ESIMS spectra of nodupetide (**25**). $^1\text{H}$  NMR spectrum of compound **25** (400 MHz,  $\text{DMSO-}d_6$ ).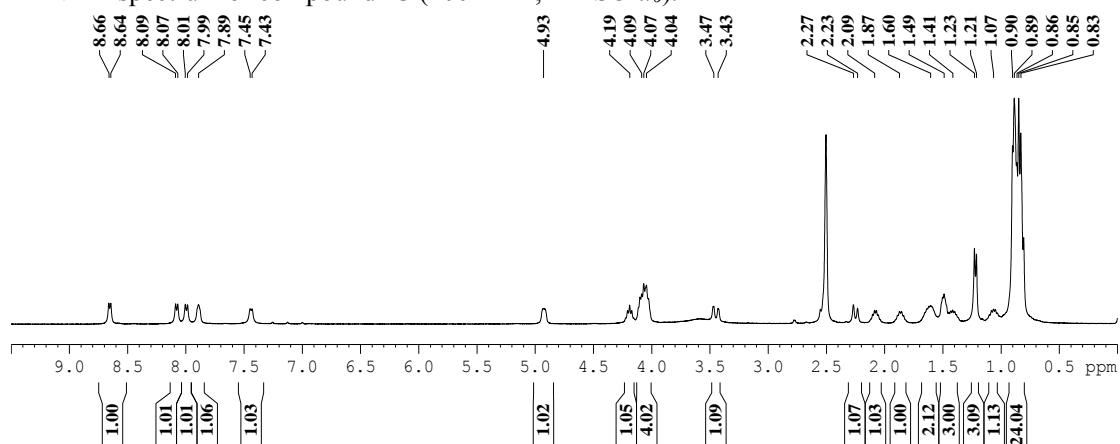 $^{13}\text{C}$  APT spectrum of **25** (400 MHz,  $\text{DMSO-}d_6$ ).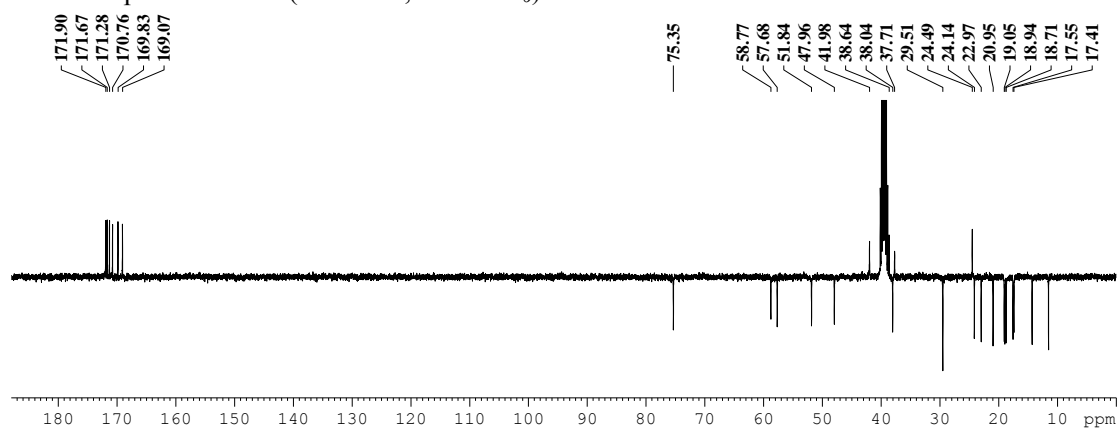ESIMS spectrum of **25**.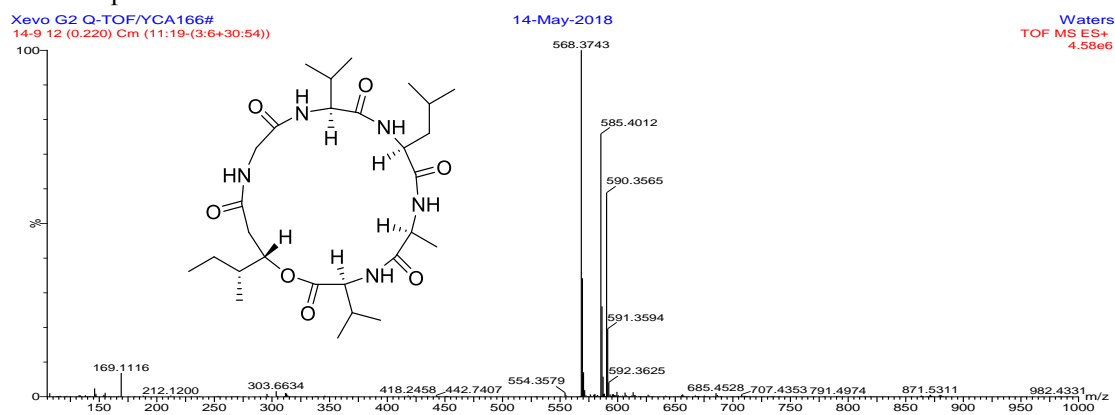

**Figure S90.**  $^1\text{H}$  and  $^{13}\text{C}$  NMR and ESIMS spectra of isariin A (**26**). $^1\text{H}$  NMR spectrum of **26** (400 MHz,  $\text{DMSO-}d_6$ ).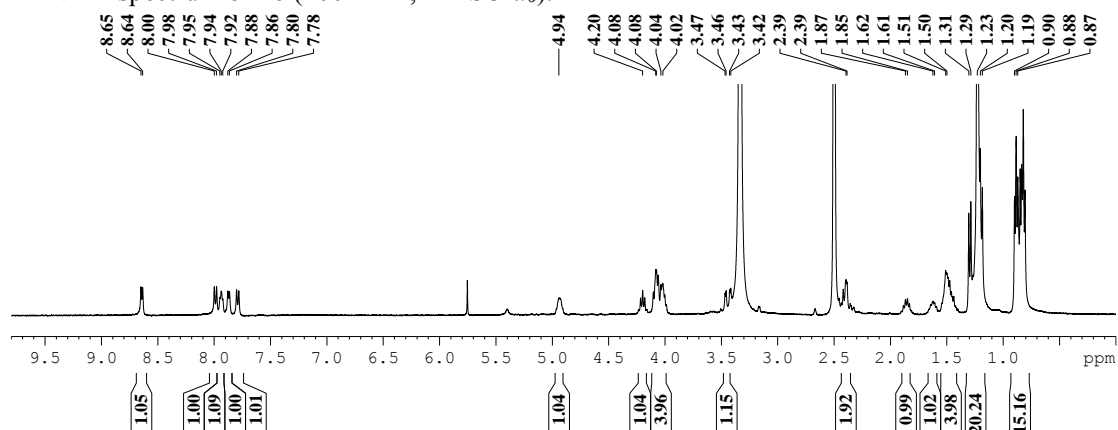APT spectrum of **26** (400 MHz,  $\text{DMSO-}d_6$ ).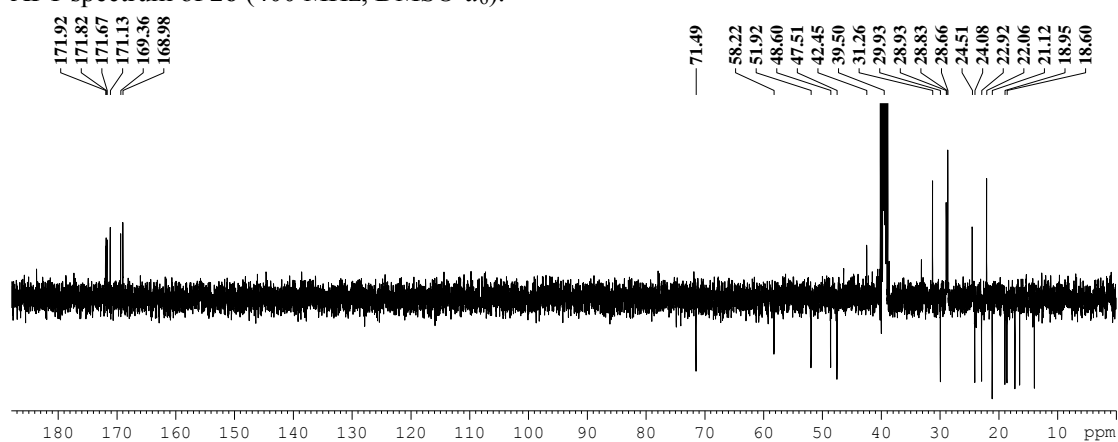ESIMS spectrum of **26**.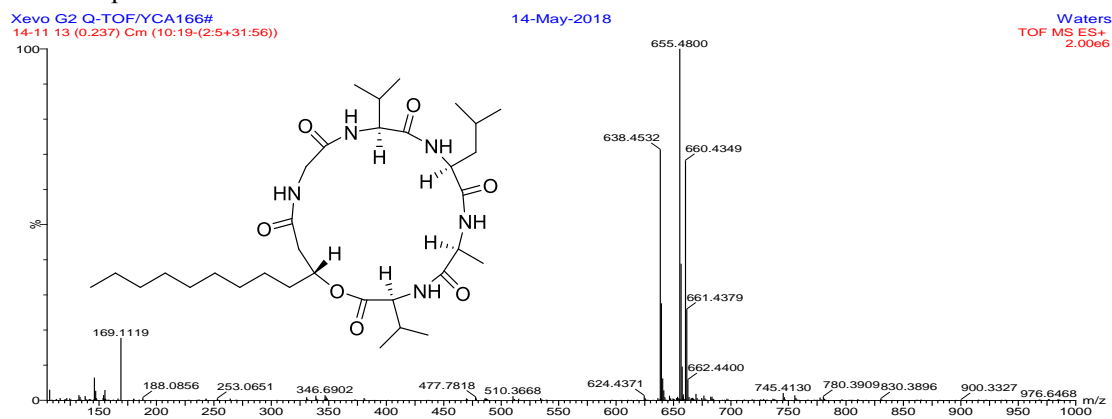

**References:**

- [1] A. Fredenhagen, L. P. Molleyres, B. Bohlendorf, G. Laue, *J Antibiot (Tokyo)* **2006**, *59*, 267.
- [2] L. T. Tan, X. C. Cheng, P. R. Jensen, W. Fenical, *J Org Chem* **2003**, *68*, 8767.
- [3] E. M. Stocking, J. F. Sanz-Cervera, R. M. Williams, C. J. Unkefer, *J Am Chem Soc* **1996**, *118*, 7008.
- [4] S. Nishikori, K. Takemoto, S. Kamisuki, S. Nakajima, K. Kuramochi, S. Tsukuda, M. Iwamoto, Y. Katayama, T. Suzuki, S. Kobayashi, K. Watashi, F. Sugawara, *J Nat Prod* **2016**, *79*, 442.
- [5] L. Li, M. C. Tang, S. Tang, S. Gao, S. Soliman, L. Hang, W. Xu, T. Ye, K. Watanabe, Y. Tang, *J Am Chem Soc* **2018**, *140*, 2067.
- [6] S. Noppawana, W. Mongkolthananarukb, N. Suwannasaic, T. Senawongd, P. Moontragoone, J. Boonmakf, S. Youngmef, S. McCloskeya, *Nat Prod Res* **2018**, *34*, 464.
- [7] H. Shimamura, H. Gouda, K. Nagai, T. Hirose, M. Ichioka, Y. Furuya, Y. Kobayashi, S. Hirono, T. Sunazuka, S. Omura, *Angew Chem Int Ed Engl* **2009**, *48*, 914.
- [8] P. Lukat, Y. Katsuyama, S. Wenzel, T. Binz, C. Konig, W. Blankenfeldt, M. Bronstrup, R. Muller, *Chem Sci* **2017**, *8*, 7521.
